# Supplementary material for: Synthesis of benzofused cyclobutaoxepanones via intramolecular annulation of o-cinnamyl chalcones
Source: Royal Society of Chemistry journal article supplement (doi:10.1039/d1ob00058f), 2021-01-01
Supplement: d1ob00058f1.pdf [file d1ob00058f1.pdf]

# Supporting Information

## Synthesis of Benzofused Cyclobutaoxepanones via Intramolecular Annulation of *o*-Cinnamyl Chalcones

Meng-Yang Chang<sup>\*a,b</sup> and Min-Chen Tsai<sup>a</sup>

<sup>a</sup>Department of Medicinal and Applied Chemistry, Kaohsiung Medical University, Kaohsiung 807,  
Taiwan <sup>b</sup>Department of Medical Research, Kaohsiung Medical University Hospital, Kaohsiung 807,  
Taiwan

\*Corresponding author, Email: [mychang@kmu.edu.tw](mailto:mychang@kmu.edu.tw)

### Table of Contents

|                                                                                                                                                                 |             |
|-----------------------------------------------------------------------------------------------------------------------------------------------------------------|-------------|
| 1. <sup>1</sup> H NMR and <sup>13</sup> C NMR spectra copies of <b>4a-4k</b>                                                                                    | S-2~S-23    |
| 2. <sup>1</sup> H NMR and <sup>13</sup> C NMR spectra copies of <b>5a-5ae</b>                                                                                   | S-24~S-85   |
| 3. <sup>1</sup> H NMR and <sup>13</sup> C NMR spectra copies of <b>6a-6u</b> , <b>6ac-6ad</b>                                                                   | S-91~S-131  |
| 4. <sup>1</sup> H NMR and <sup>13</sup> C NMR spectra copies of <b>7a</b> , <b>7d-7f</b> , <b>7h</b> , <b>7j</b> , <b>7m</b> , <b>7o</b> , <b>7q</b> , <b>8</b> | S-132~S-151 |
| 5. X-ray crystal data of <b>6a</b> , <b>6d</b> , <b>7a</b> and <b>7m</b>                                                                                        | S-152~S-159 |

# Compound 4a (<sup>1</sup>H-NMR spectral data)

SS1060309

Pulse Sequence: s2pu1  
UNITYplus-400 "unity400"  
Date: Mar 10 2017  
Solvent: CDC13  
Ambient temperature  
Total 32 repetitions

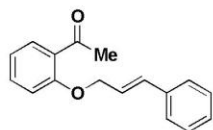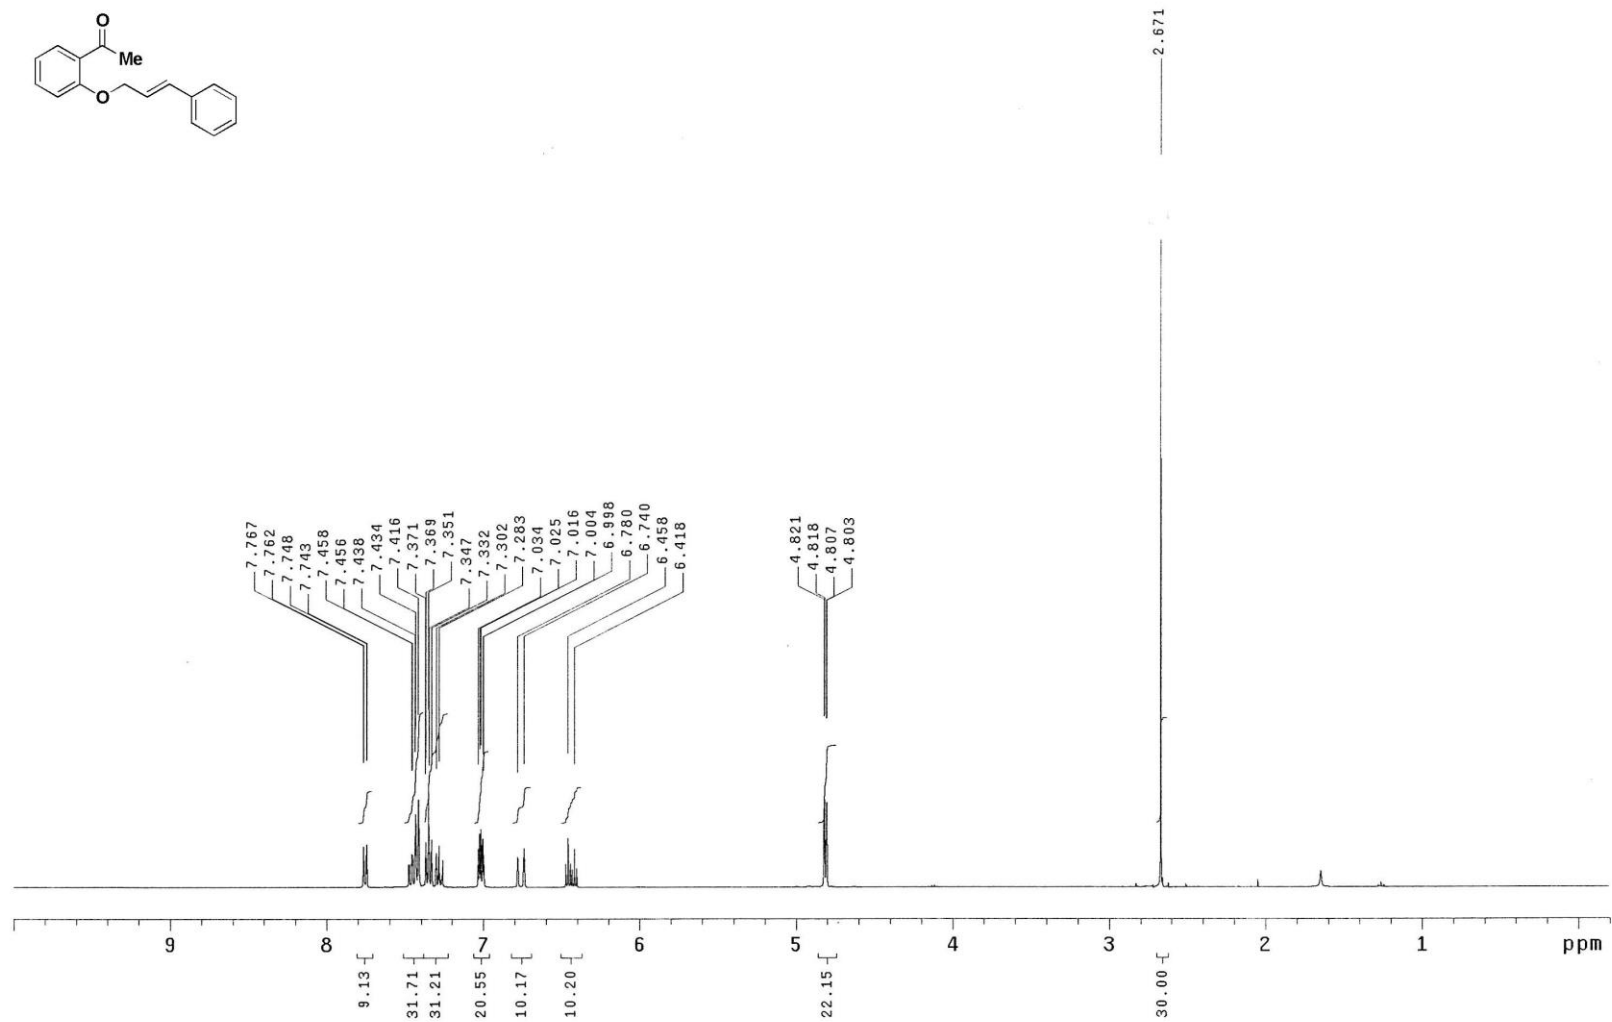

# Compound 4a (<sup>13</sup>C-NMR spectral data)

SS1060309

Pulse Sequence: s2pu1  
UNITYplus-400 "unity400"  
Date: Mar 10 2017  
Solvent: CDCl<sub>3</sub>  
Ambient temperature  
Total 1024 repetitions

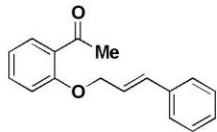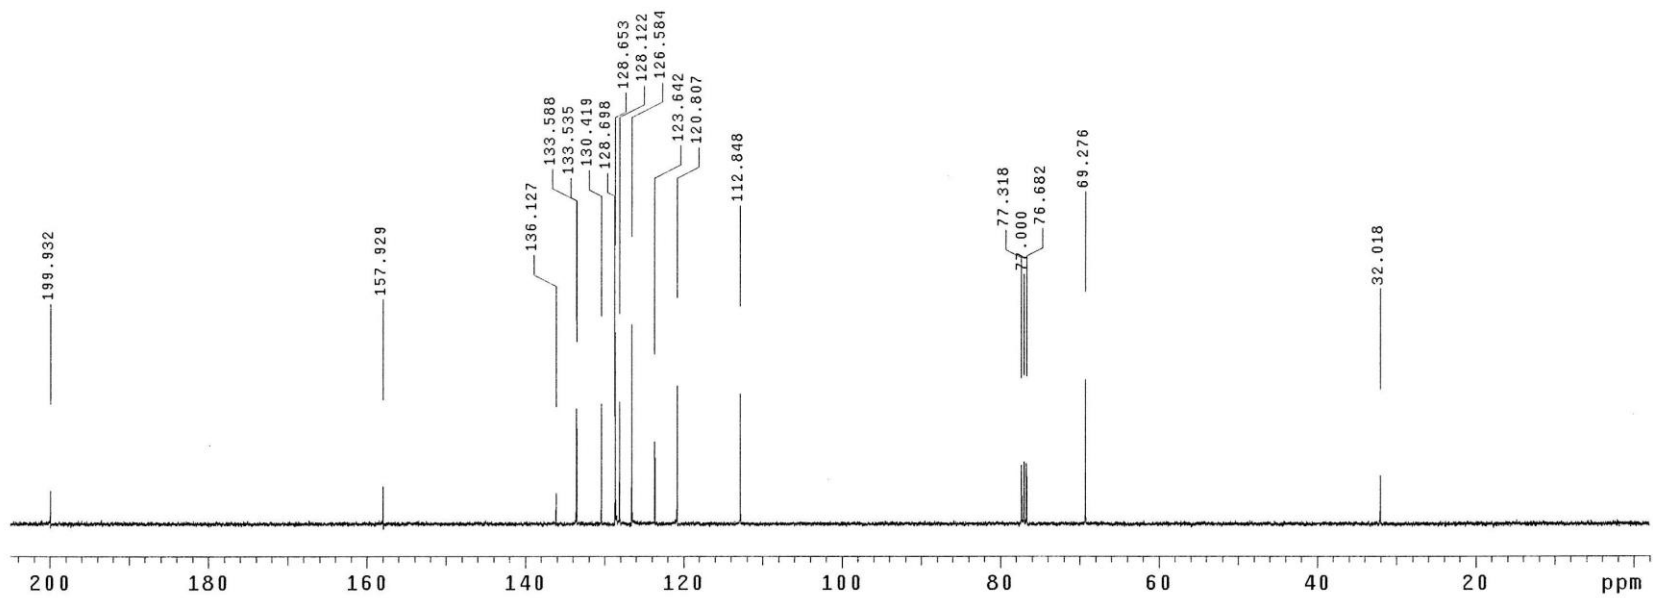

# Compound 4b (<sup>1</sup>H-NMR spectral data)

SS1060320

Pulse Sequence: s2pu1  
UNITYplus-400 "unity400"  
Date: Mar 21 2017  
Solvent: CDCl<sub>3</sub>  
Ambient temperature  
Total 32 repetitions

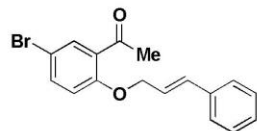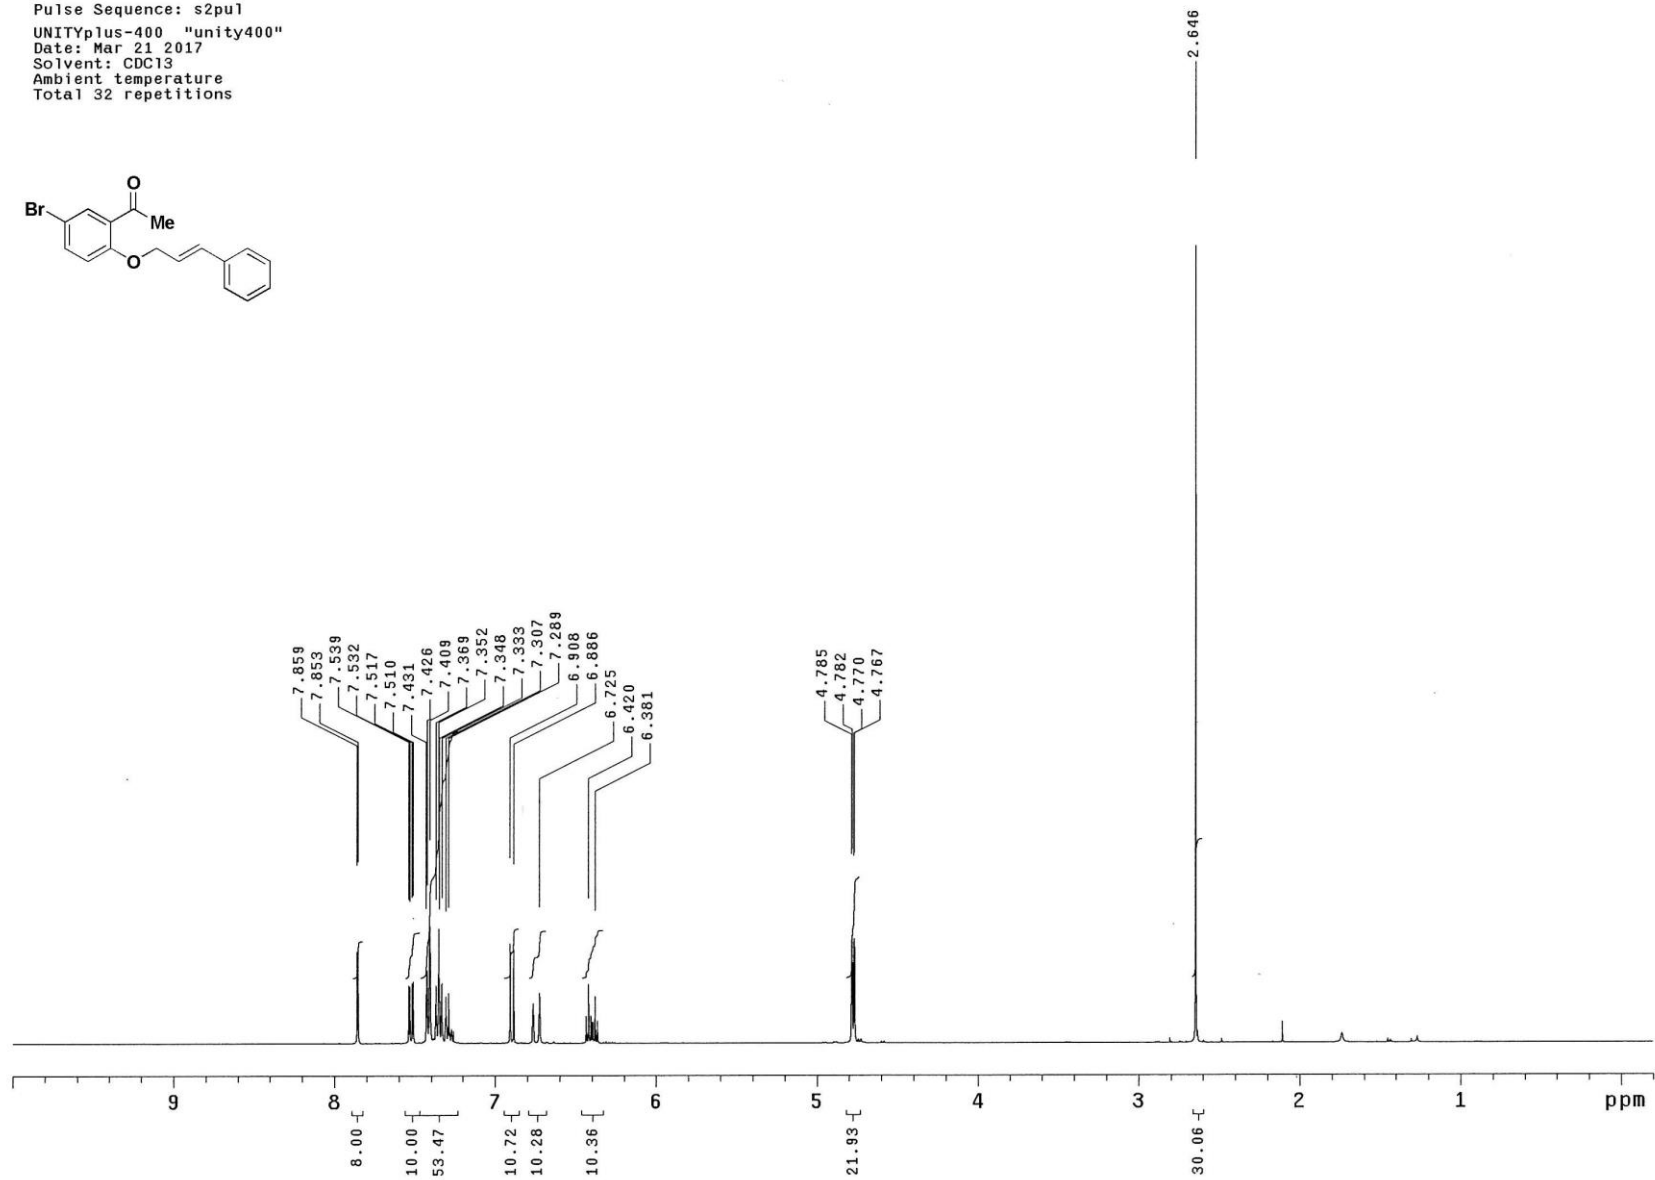



# Compound 4b (<sup>13</sup>C-NMR spectral data)

SS1060320

Pulse Sequence: s2pu1  
UNITYplus-400 "unity400"  
Date: Mar 21 2017  
Solvent: CDCl<sub>3</sub>  
Ambient temperature  
Total 240 repetitions

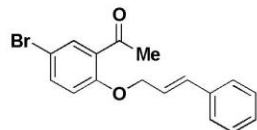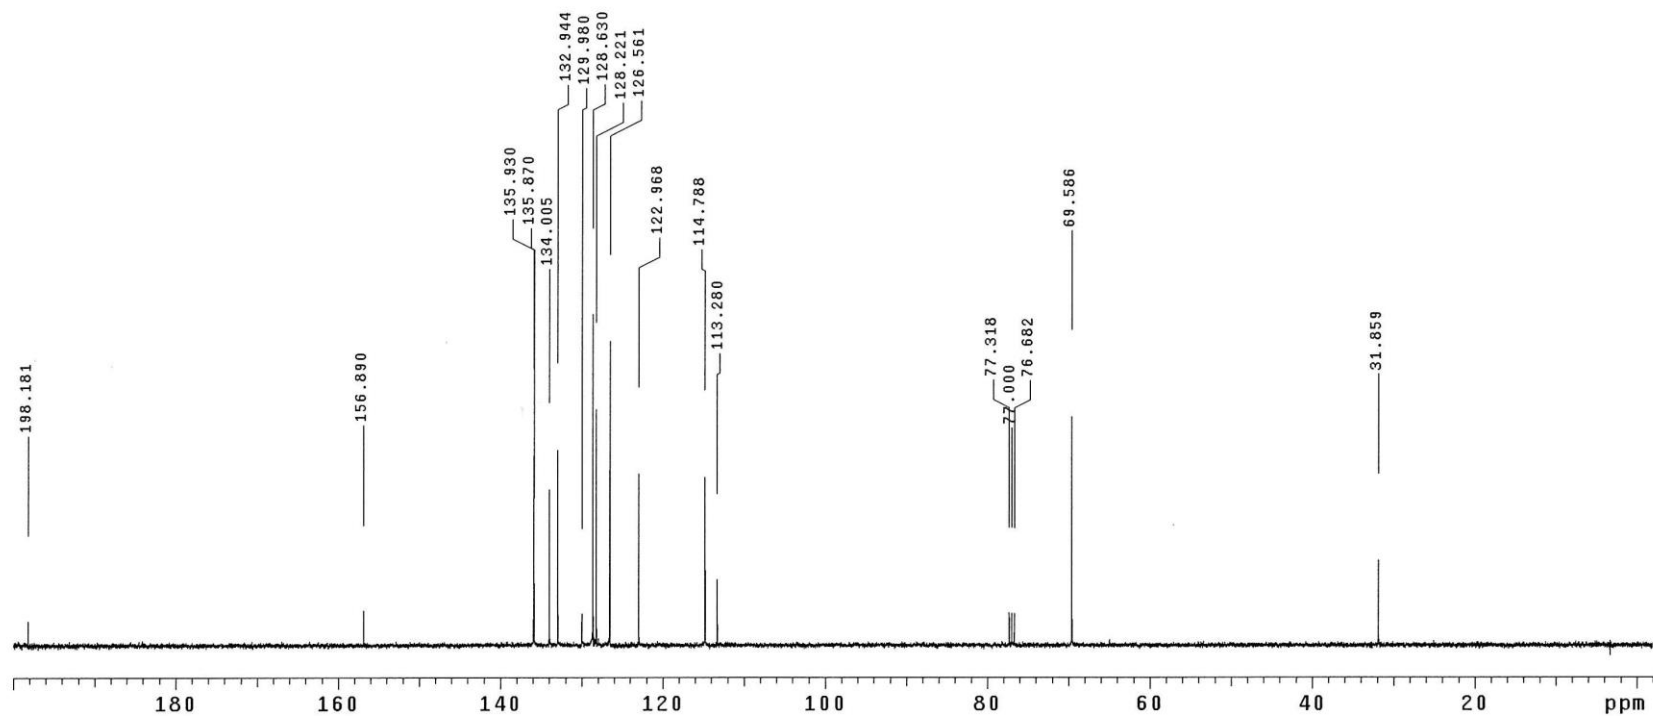

# Compound 4c (<sup>1</sup>H-NMR spectral data)

MC1080416

Pulse Sequence: s2pu1  
UNITYplus-400 "unity400"  
Date: Apr 16 2019  
Solvent: CDCl<sub>3</sub>  
Ambient temperature  
Total 32 repetitions

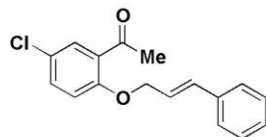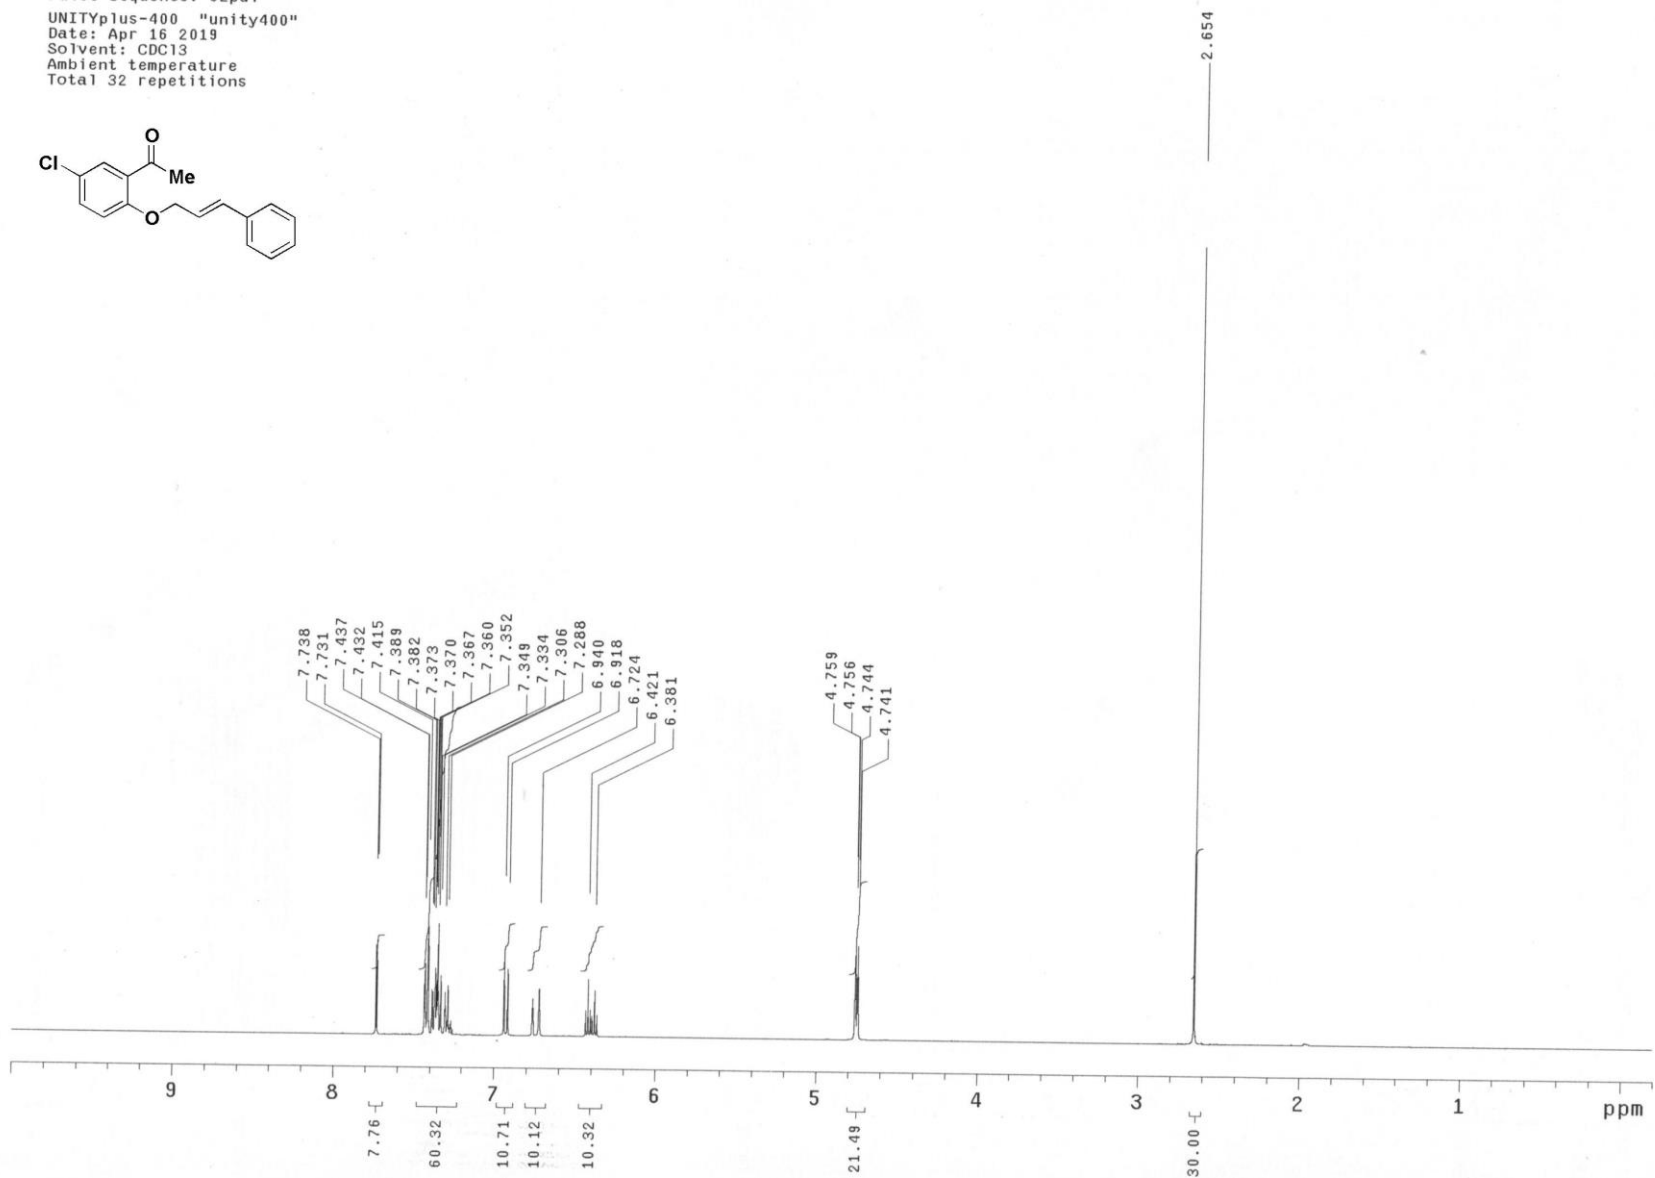

# Compound 4c (<sup>13</sup>C-NMR spectral data)

MC1080416

Pulse Sequence: s2pu1

UNITYplus-400 "unity400"

Date: Apr 16 2019

Solvent: CDCl<sub>3</sub>

Ambient temperature

Total 320 repetitions

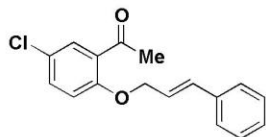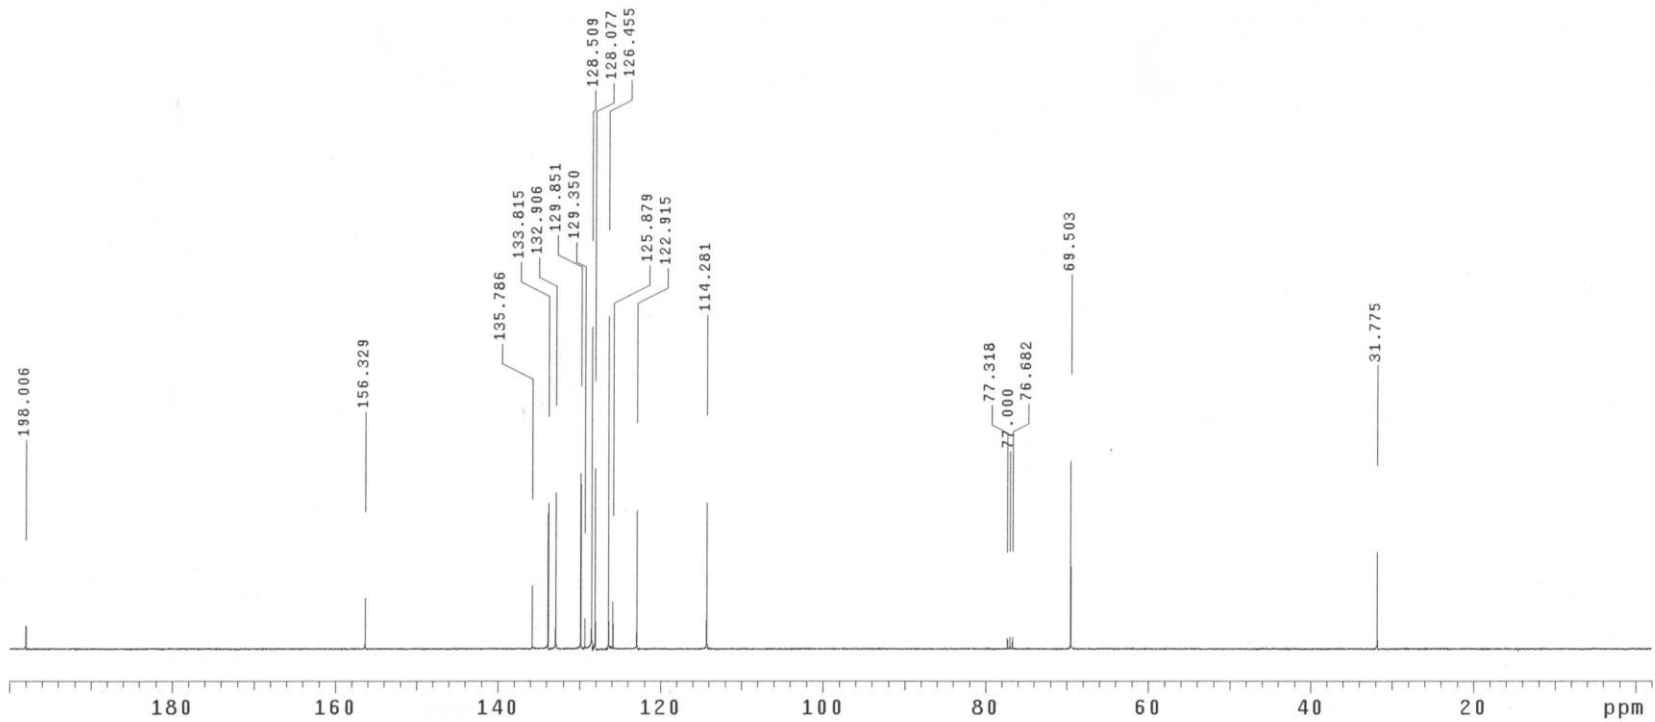

# Compound 4d (<sup>1</sup>H-NMR spectral data)

MC1080123

Pulse Sequence: s2pu1

UNITYplus-400 "unity400"

Date: Jan 23 2019

Solvent: CDCl<sub>3</sub>

Ambient temperature

Total 32 repetitions

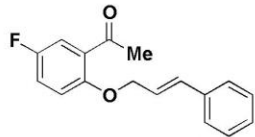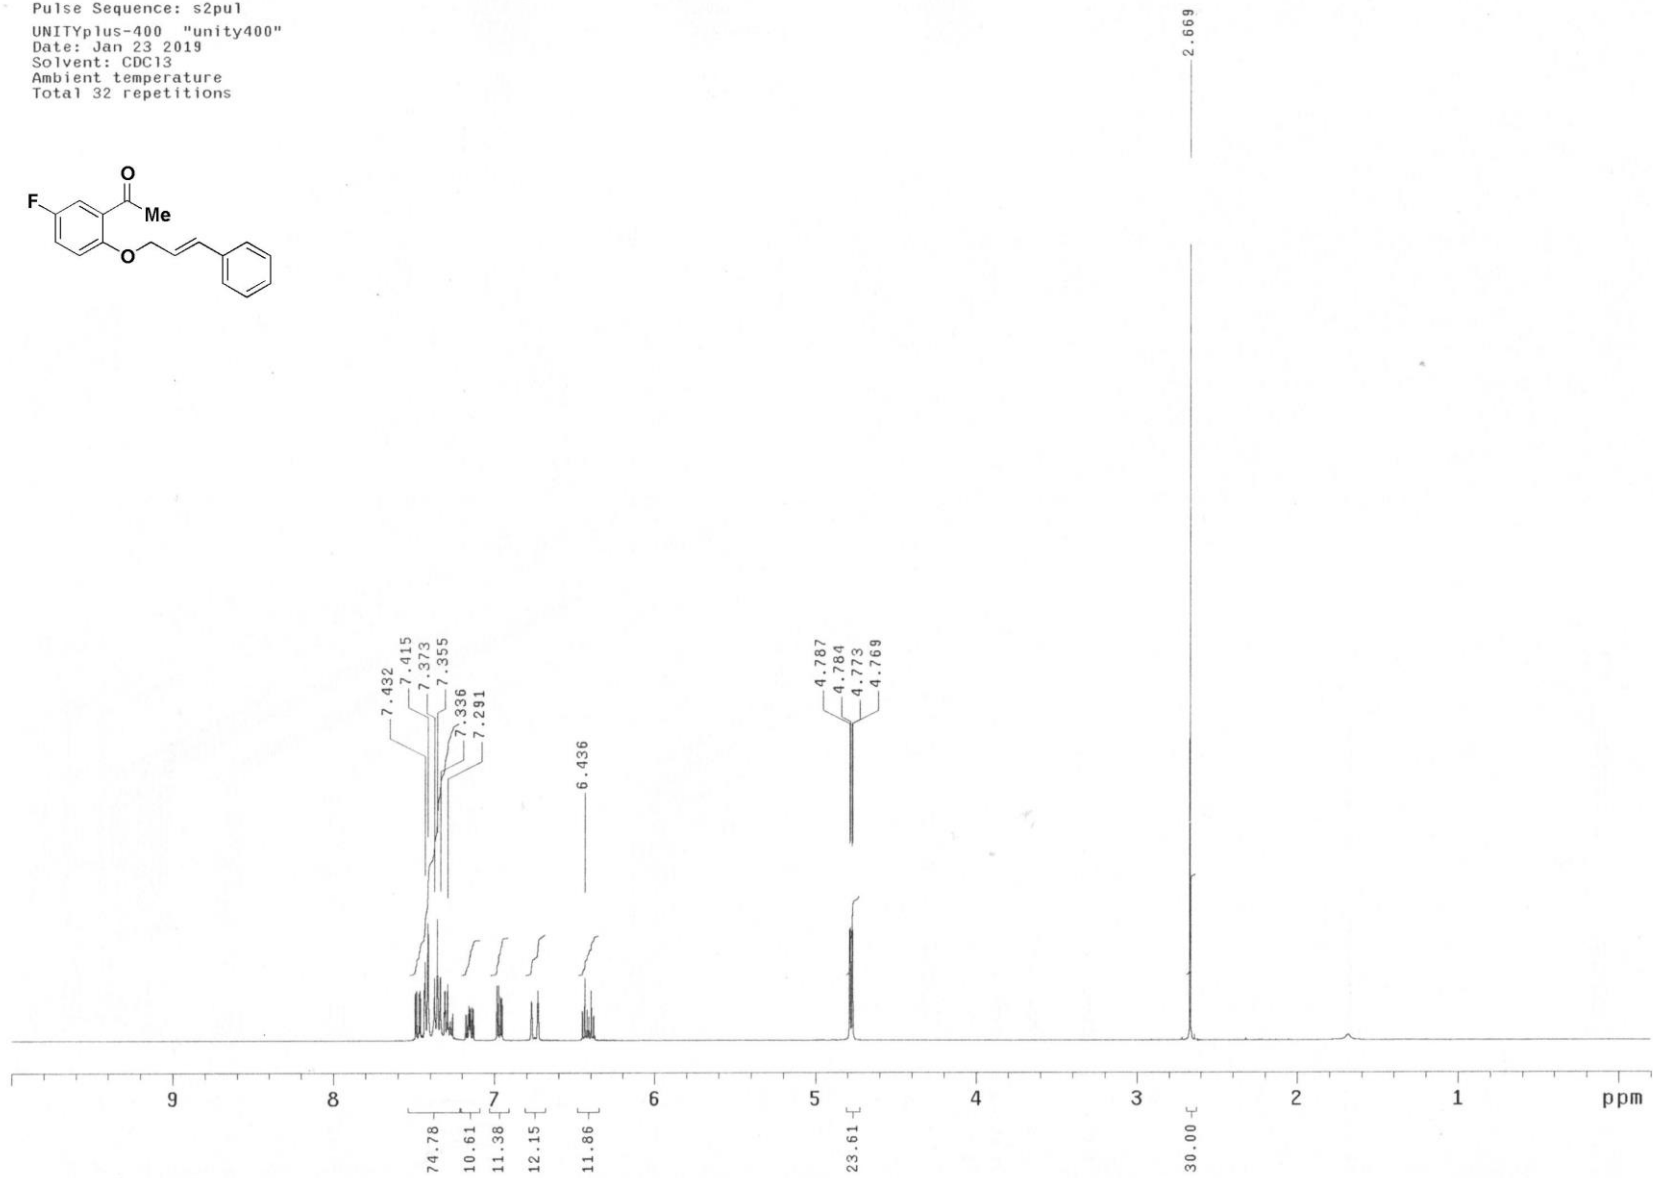

# Compound 4d (<sup>13</sup>C-NMR spectral data)

MC1080123

Pulse Sequence: s2pu1

UNITYplus-400 "unity400"

Date: Jan 23 2019

Solvent: CDCl<sub>3</sub>

Ambient temperature

Total 1072 repetitions

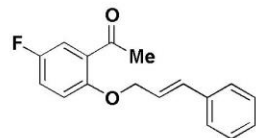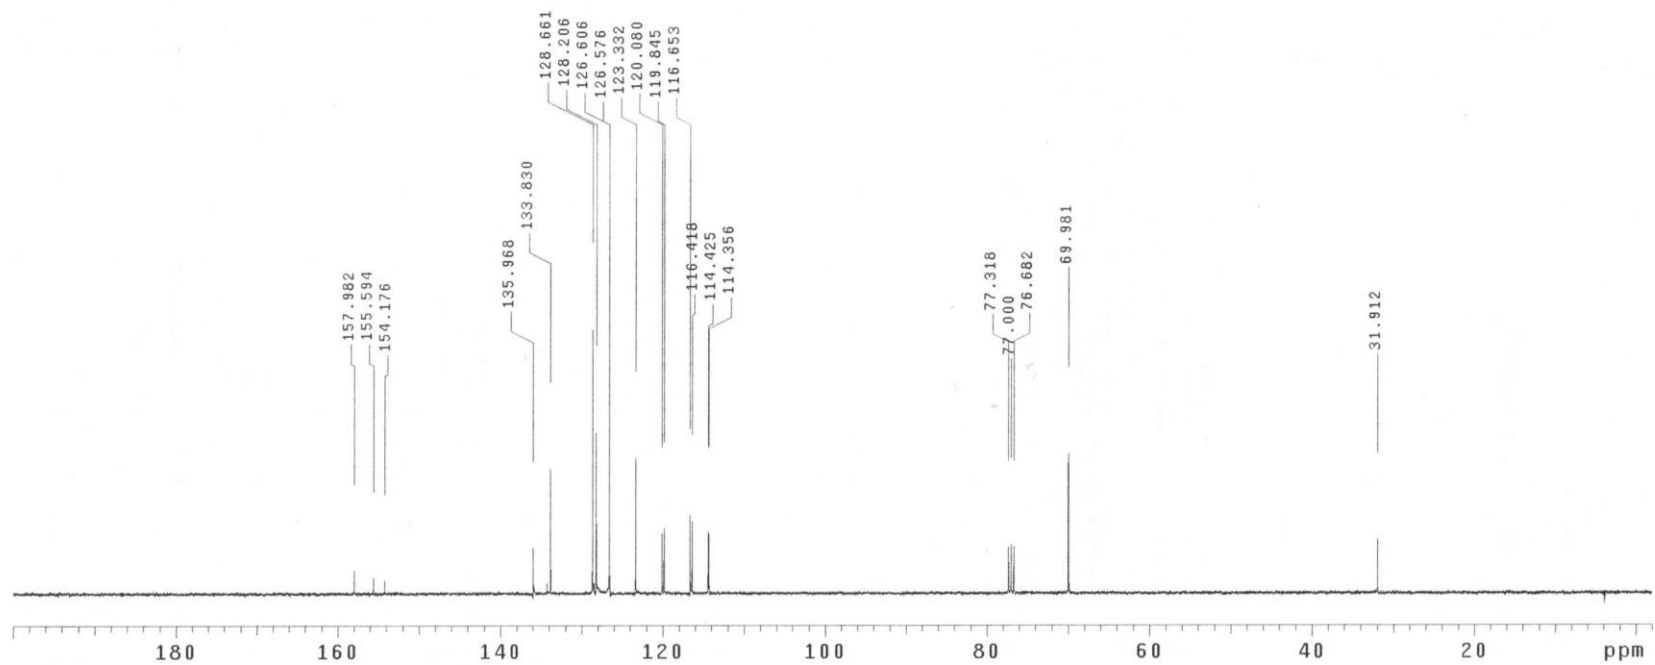

# Compound 4e (<sup>1</sup>H-NMR spectral data)

MC1080103

Pulse Sequence: s2pu1

UNITYplus-400 "unity400"

Date: Jan 7 2019

Solvent: CDCl<sub>3</sub>

Ambient temperature

Total 32 repetitions

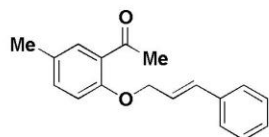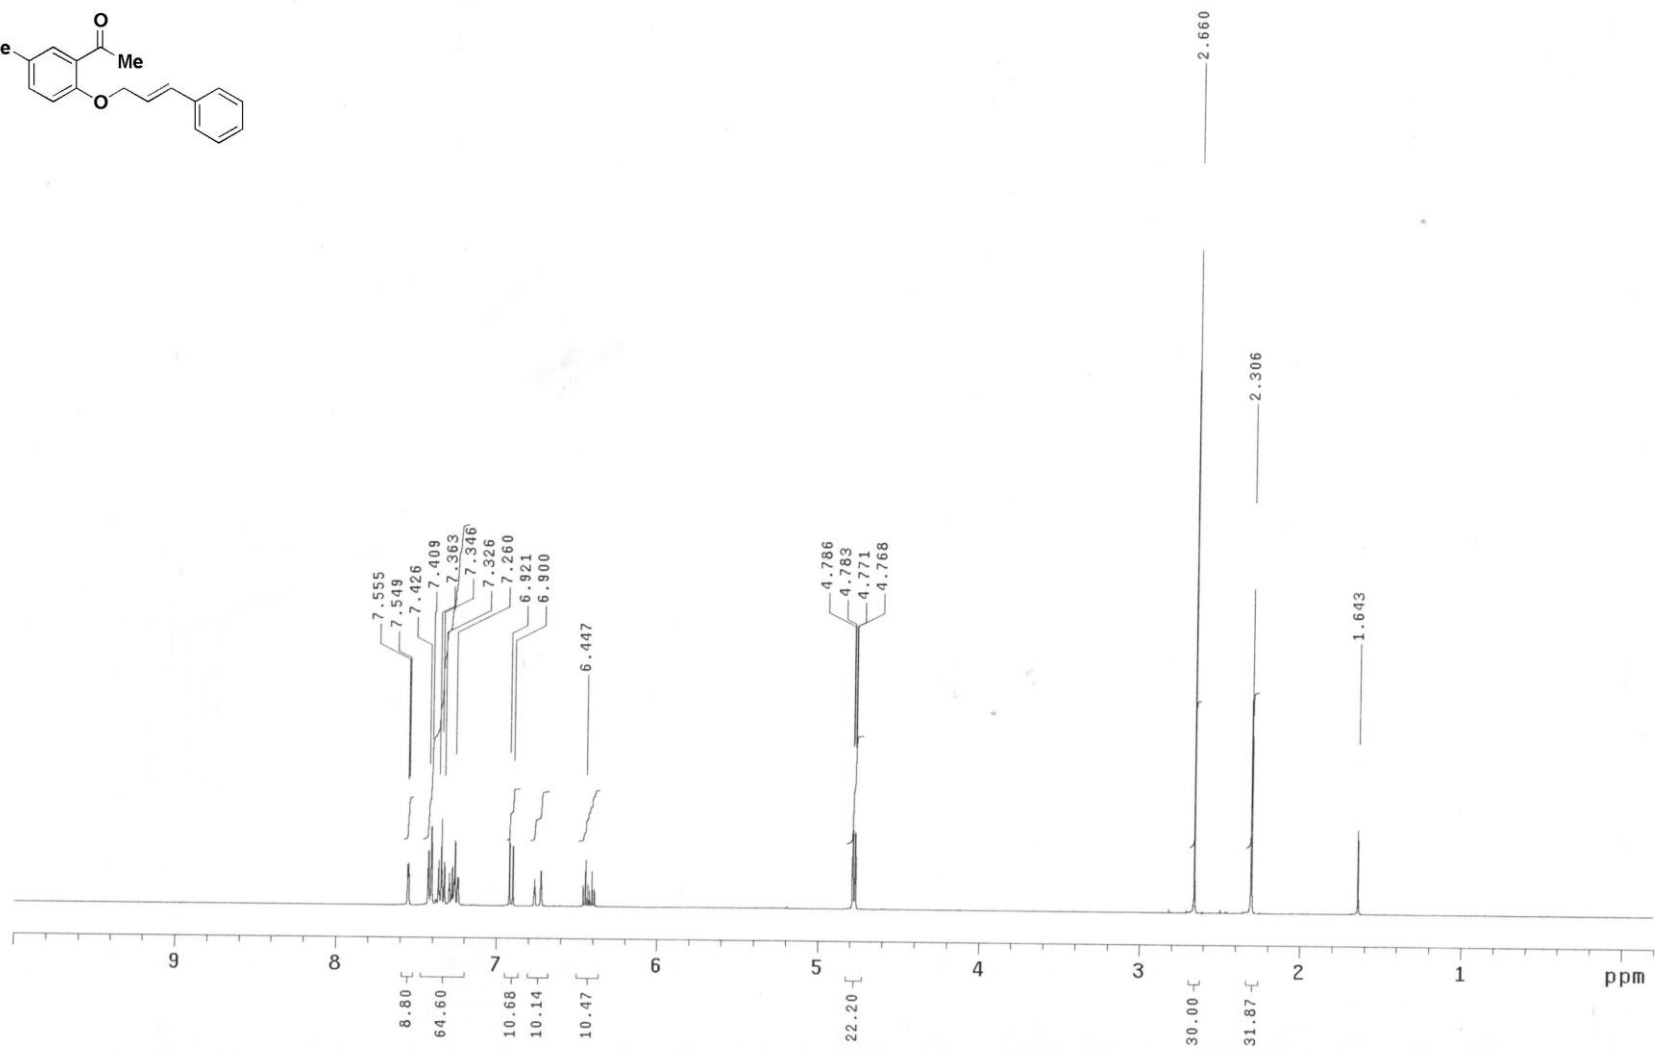

# Compound 4e (<sup>13</sup>C-NMR spectral data)

MC1080103

Pulse Sequence: s2pu1

UNITYplus-400 "unity400"

Date: Jan 7 2019

Solvent: CDCl<sub>3</sub>

Ambient temperature

Total 816 repetitions

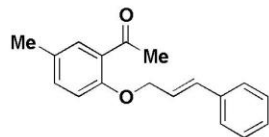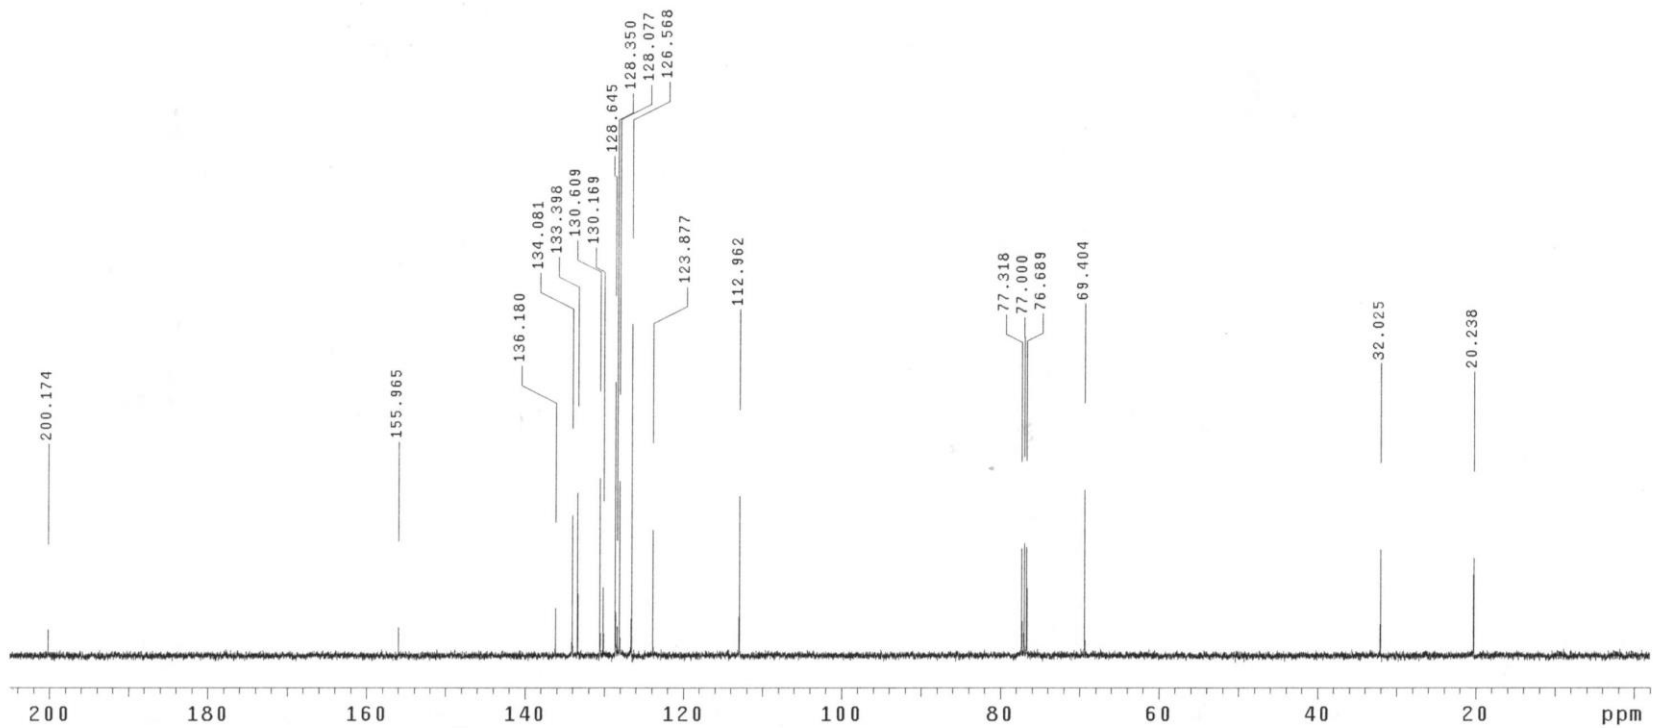

# Compound 4f (<sup>1</sup>H-NMR spectral data)

MC1080124

Pulse Sequence: s2pu1  
UNITYplus-400 "unity400"  
Date: Jan 29 2019  
Solvent: CDCl<sub>3</sub>  
Ambient temperature  
Total 32 repetitions

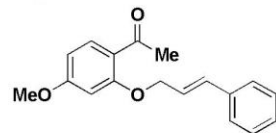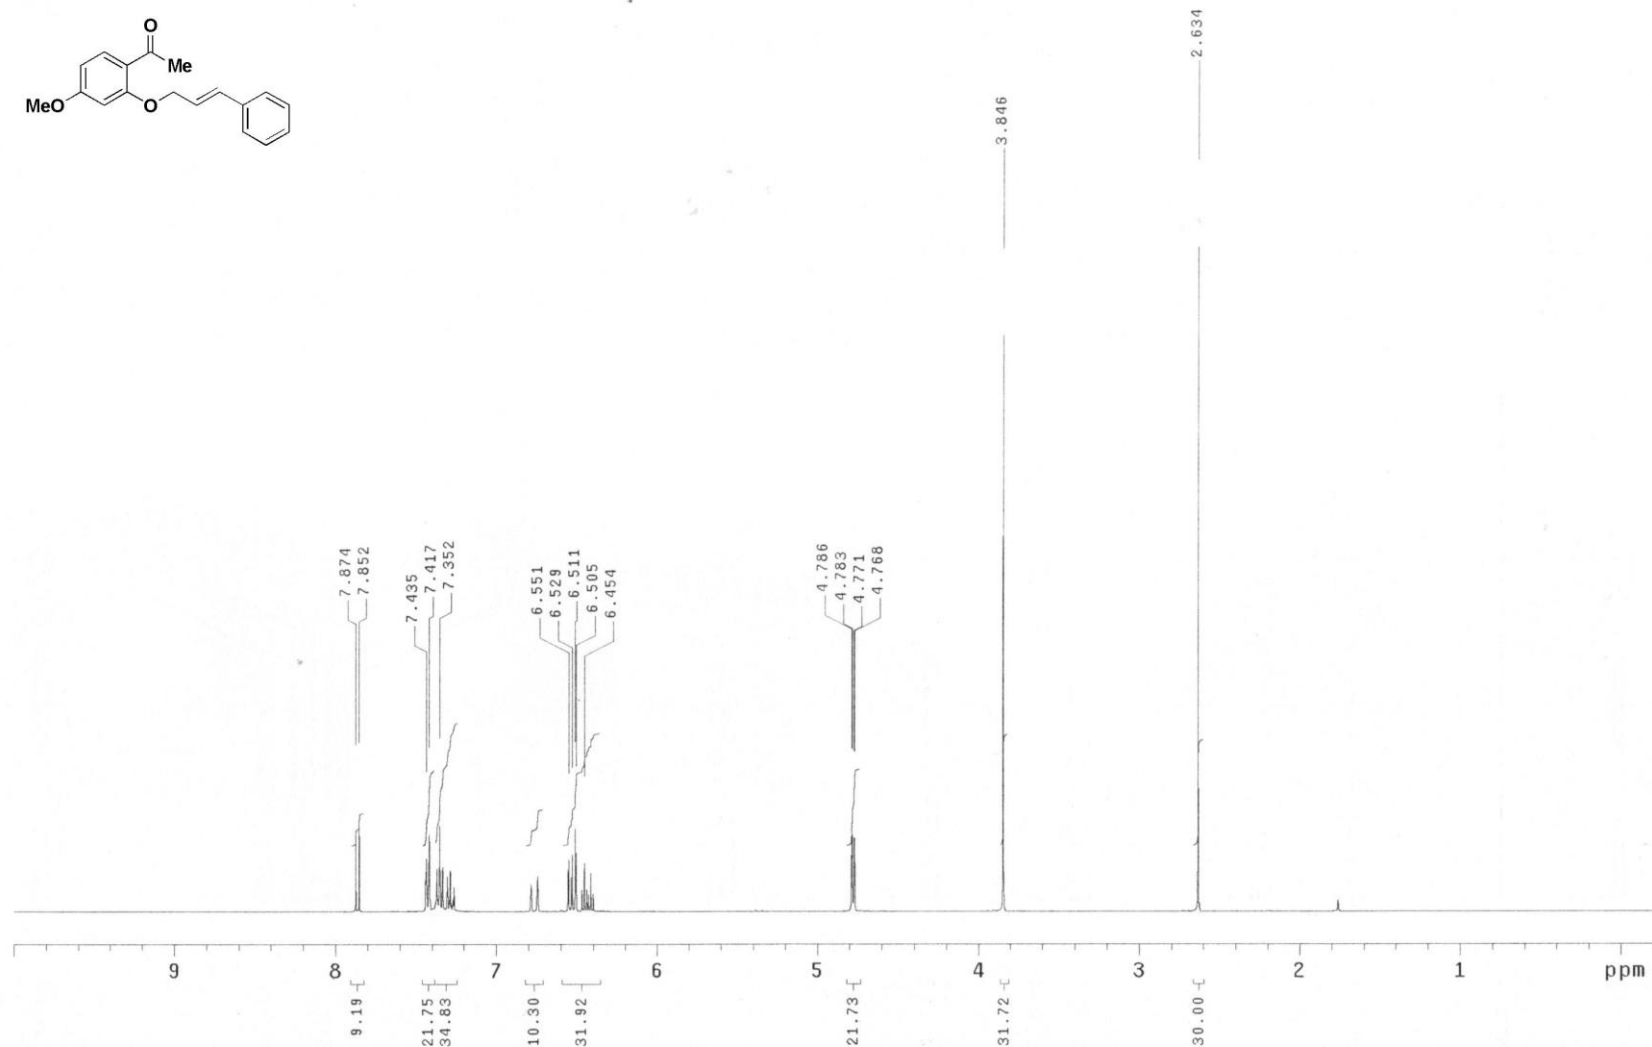



# Compound 4f (<sup>13</sup>C-NMR spectral data)

MC1080124

Pulse Sequence: s2pu1

UNITYplus-400 "unity400"

Date: Jan 29 2019

Solvent: CDCl<sub>3</sub>

Ambient temperature

Total 272 repetitions

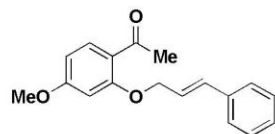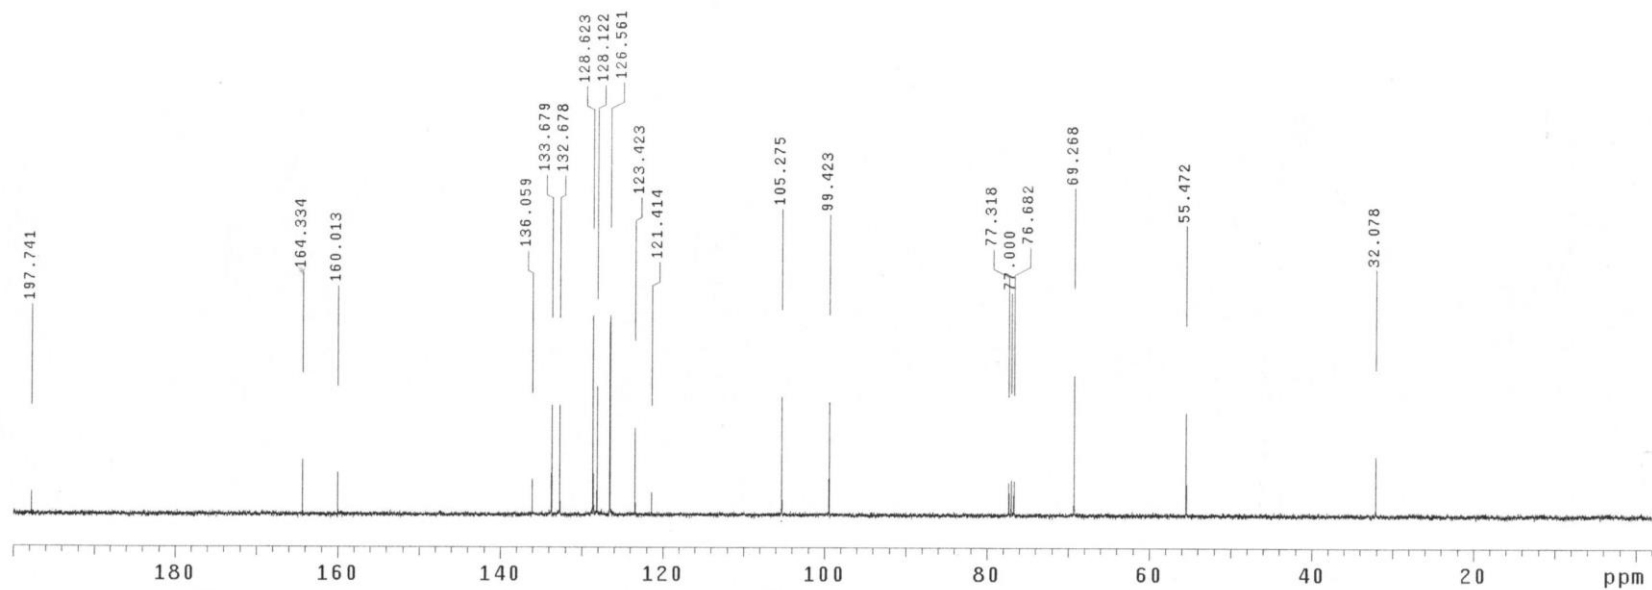

# Compound 4g (<sup>1</sup>H-NMR spectral data)

MC1071224

Pulse Sequence: s2pu1

UNITYplus-400 "unity400"

Date: Dec 24 2018

Solvent: CDCl<sub>3</sub>

Ambient temperature

Total 32 repetitions

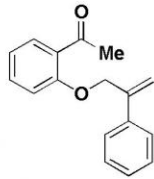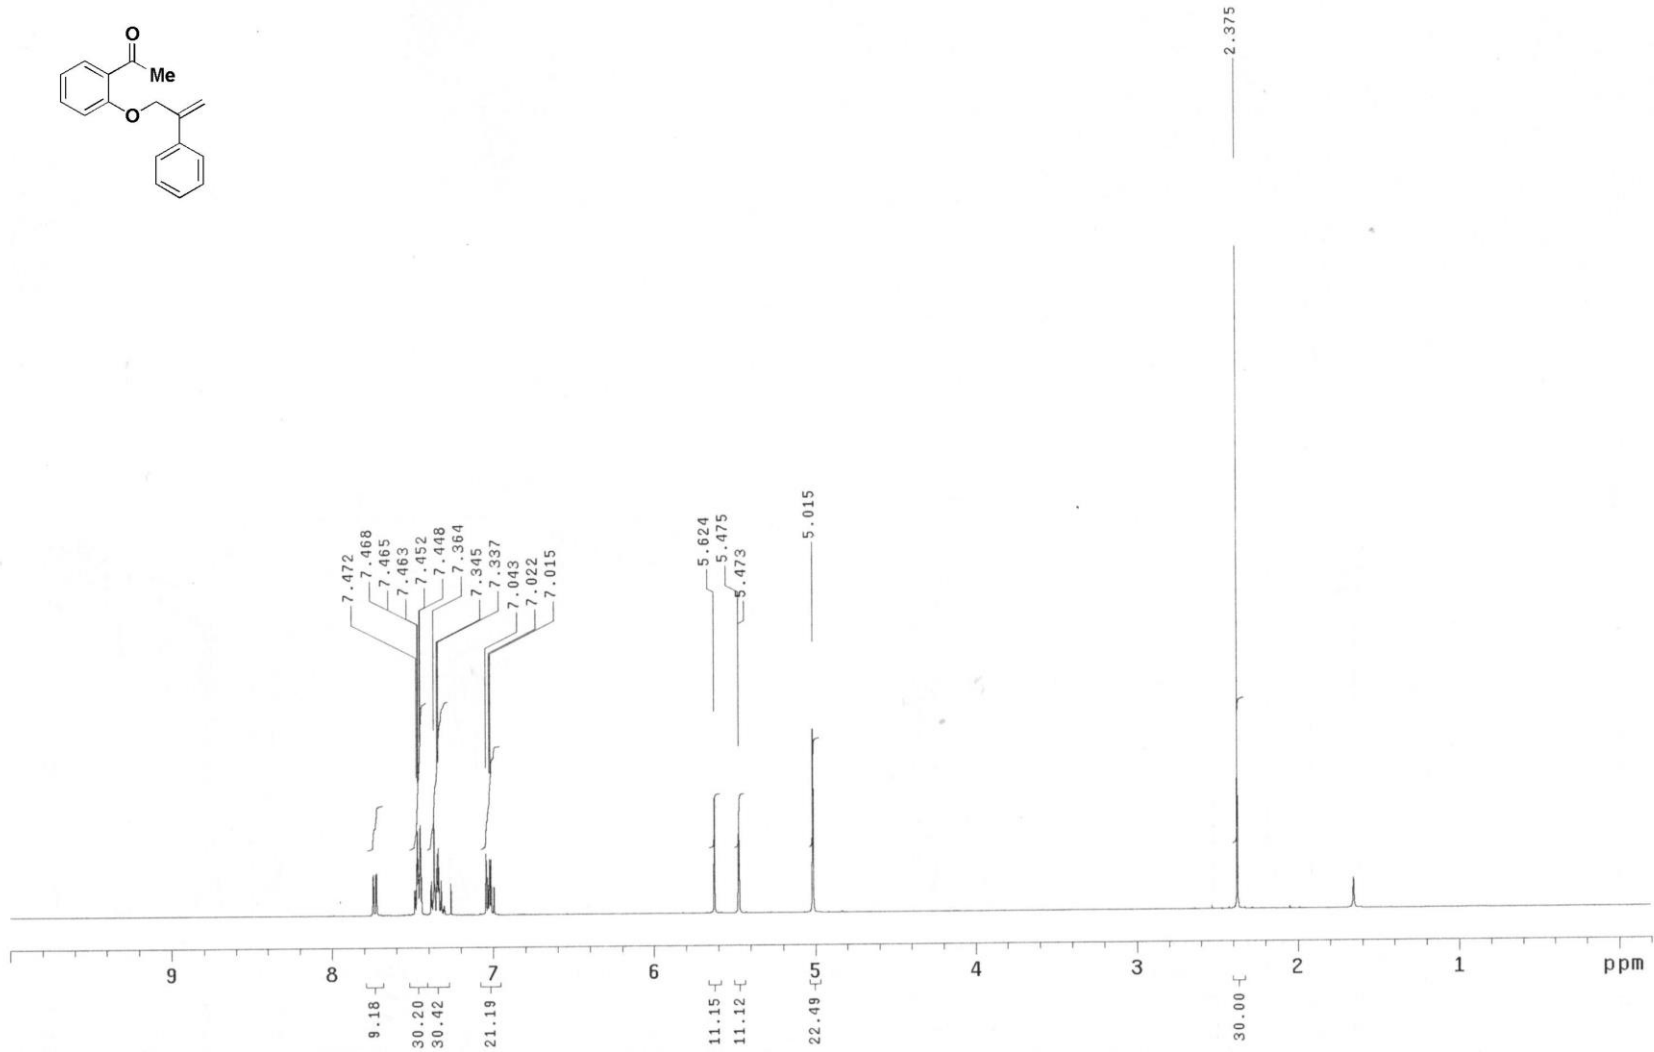

# Compound 4g (<sup>13</sup>C-NMR spectral data)

MC1071224

Pulse Sequence: s2pu1  
UNITYplus-400 "unity400"  
Date: Dec 24 2018  
Solvent: CDCl<sub>3</sub>  
Ambient temperature  
Total 2272 repetitions

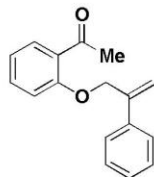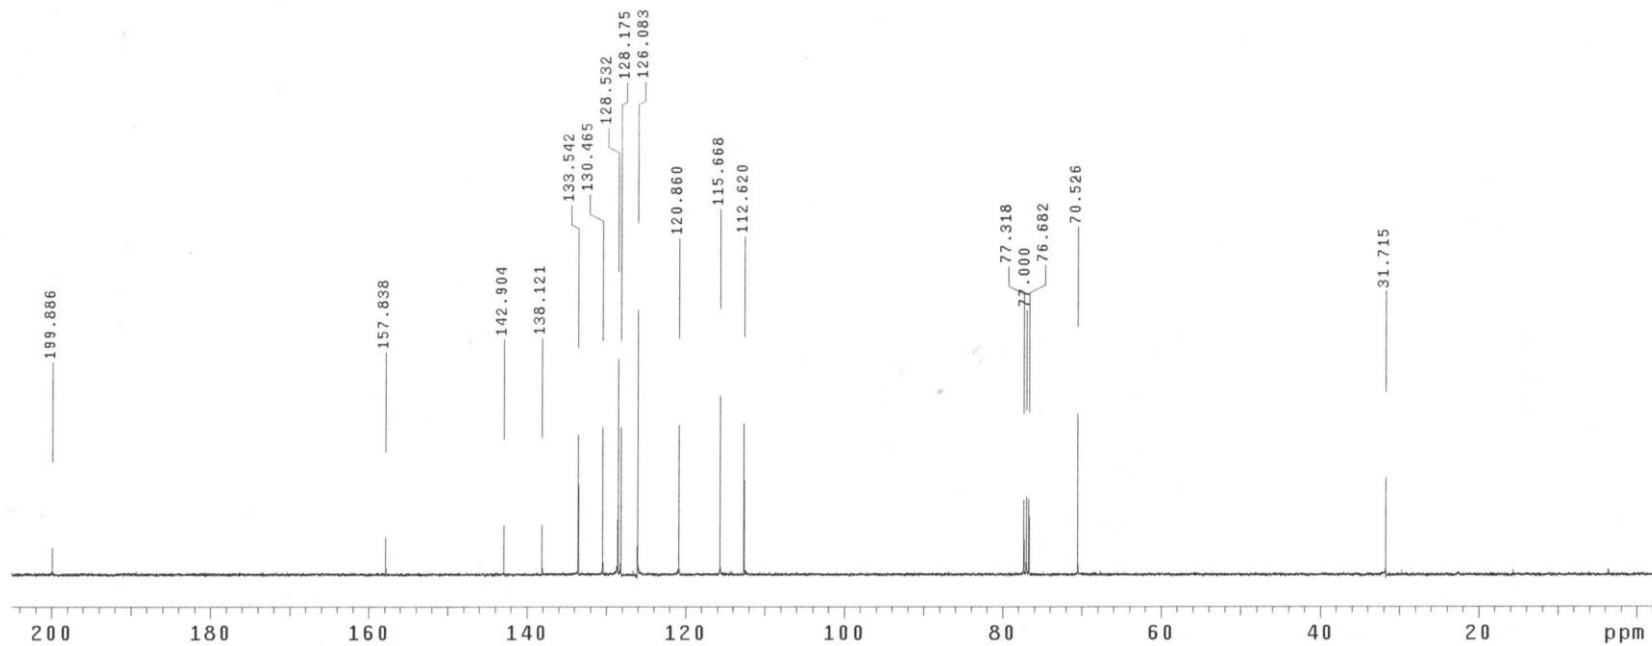

# Compound 4h (<sup>1</sup>H-NMR spectral data)

MC1080429

Pulse Sequence: s2pu1  
UNITYplus-400 "unity400"  
Date: Apr 29 2019  
Solvent: CDCl3  
Ambient temperature  
Total 32 repetitions

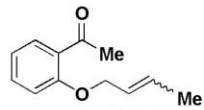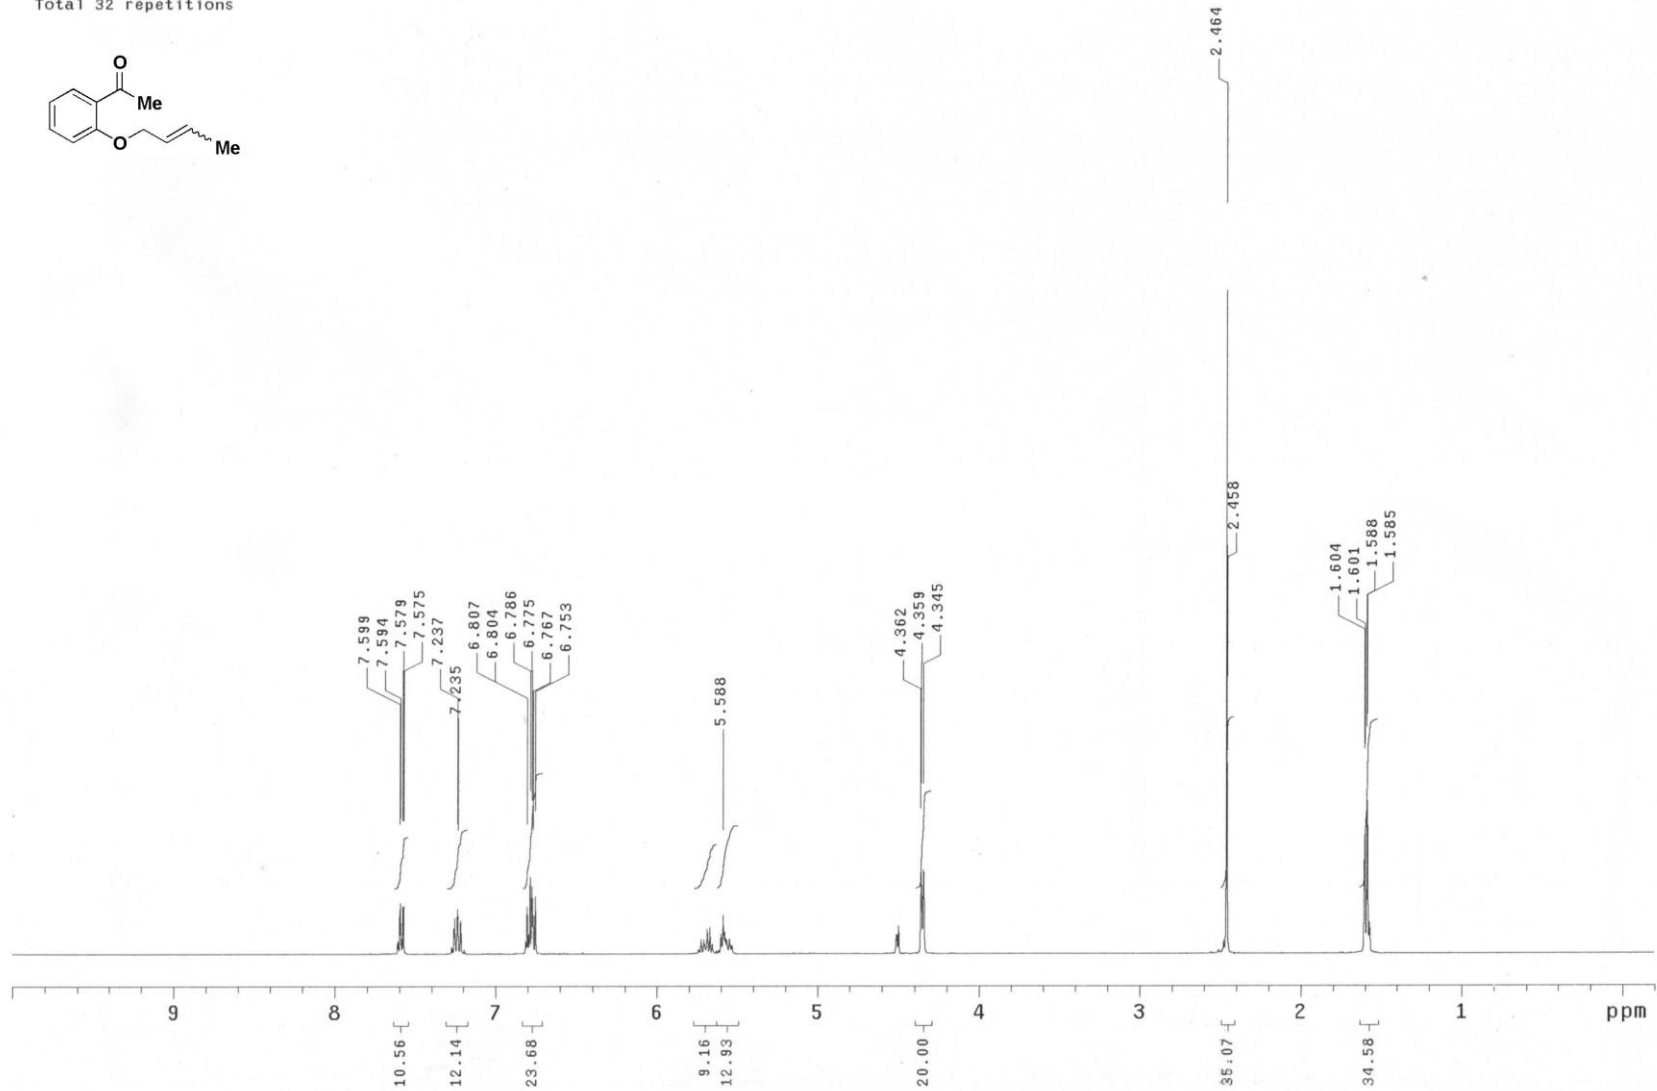

# Compound 4h (<sup>13</sup>C-NMR spectral data)

MC1080429

Pulse Sequence: s2pu1

UNITYplus-400 "unity400"

Date: Apr 29 2019

Solvent: CDCl<sub>3</sub>

Ambient temperature

Total 128 repetitions

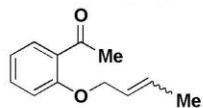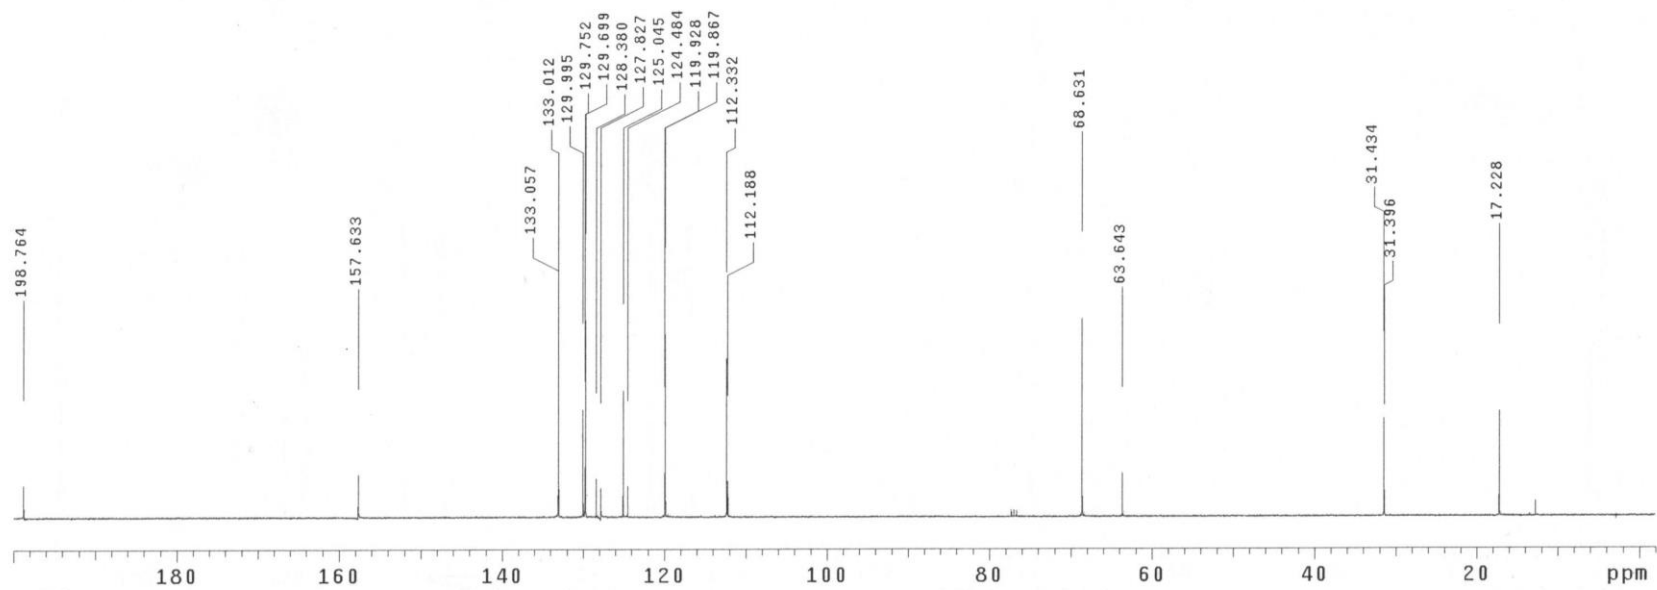

# Compound 4i (<sup>1</sup>H-NMR spectral data)

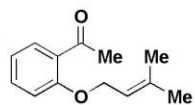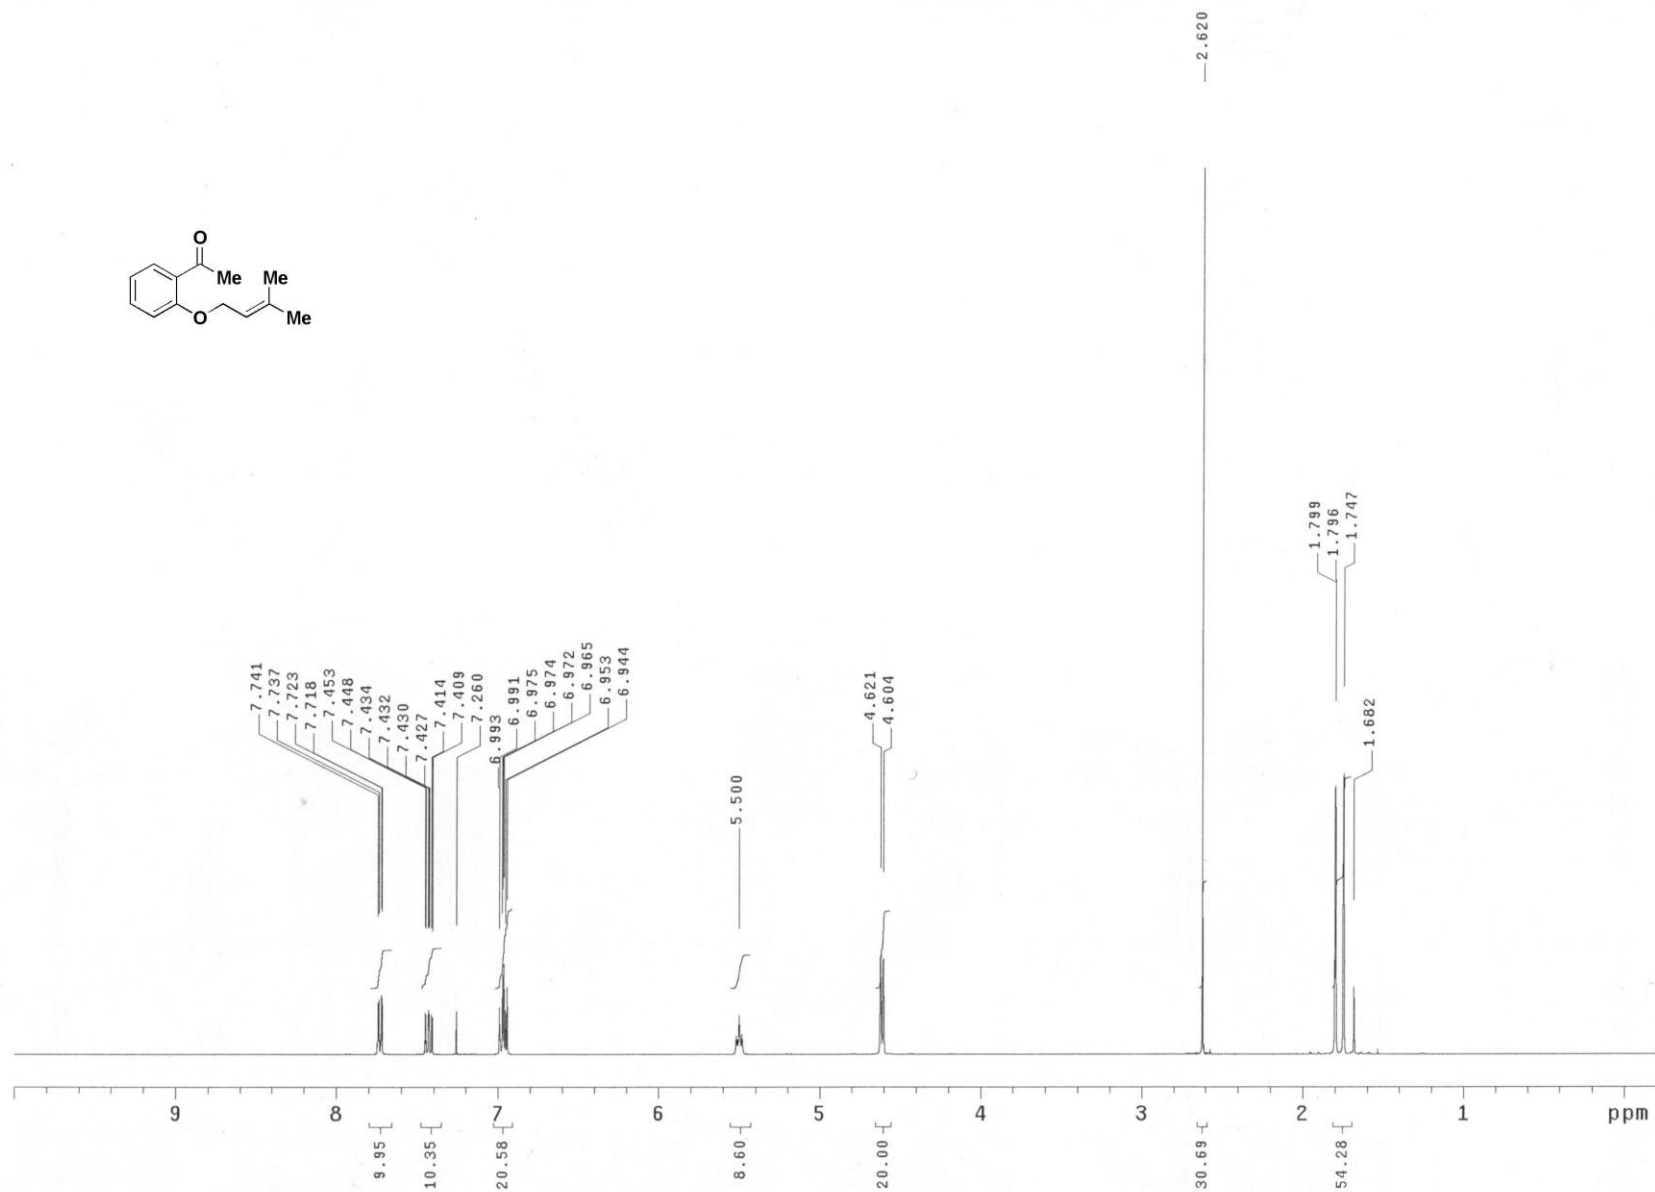

# Compound 4i (<sup>13</sup>C-NMR spectral data)

MCXK2C03

Pulse Sequence: s2pu1

UNITYplus-400 "unity400"

Date: Apr 18 2019

Solvent: CDCl<sub>3</sub>

Ambient temperature

Total 2256 repetitions

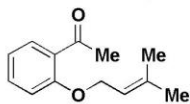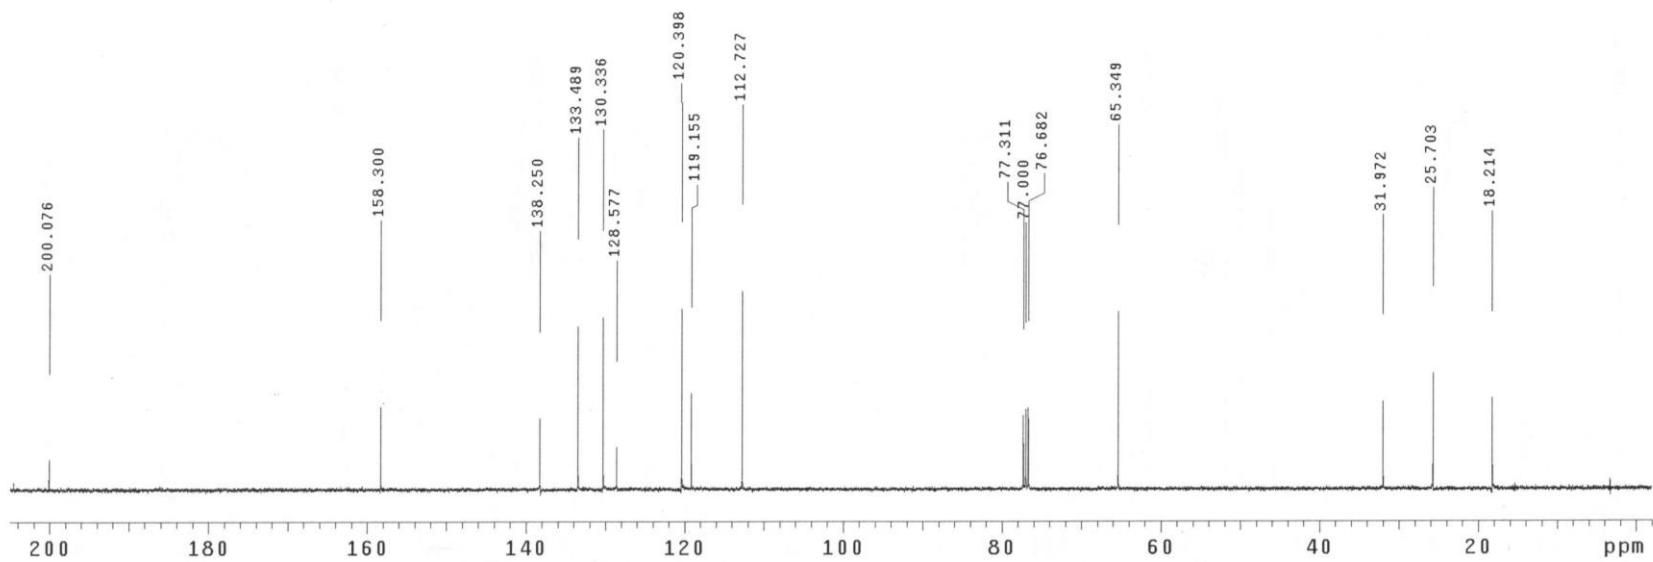

# Compound 4j (<sup>1</sup>H-NMR spectral data)

MCNBsCin

Pulse Sequence: s2pu1

UNITYplus-400 "unity400"

Date: May 15 2019

Solvent: CDCl<sub>3</sub>

Ambient temperature

Total 32 repetitions

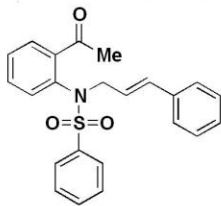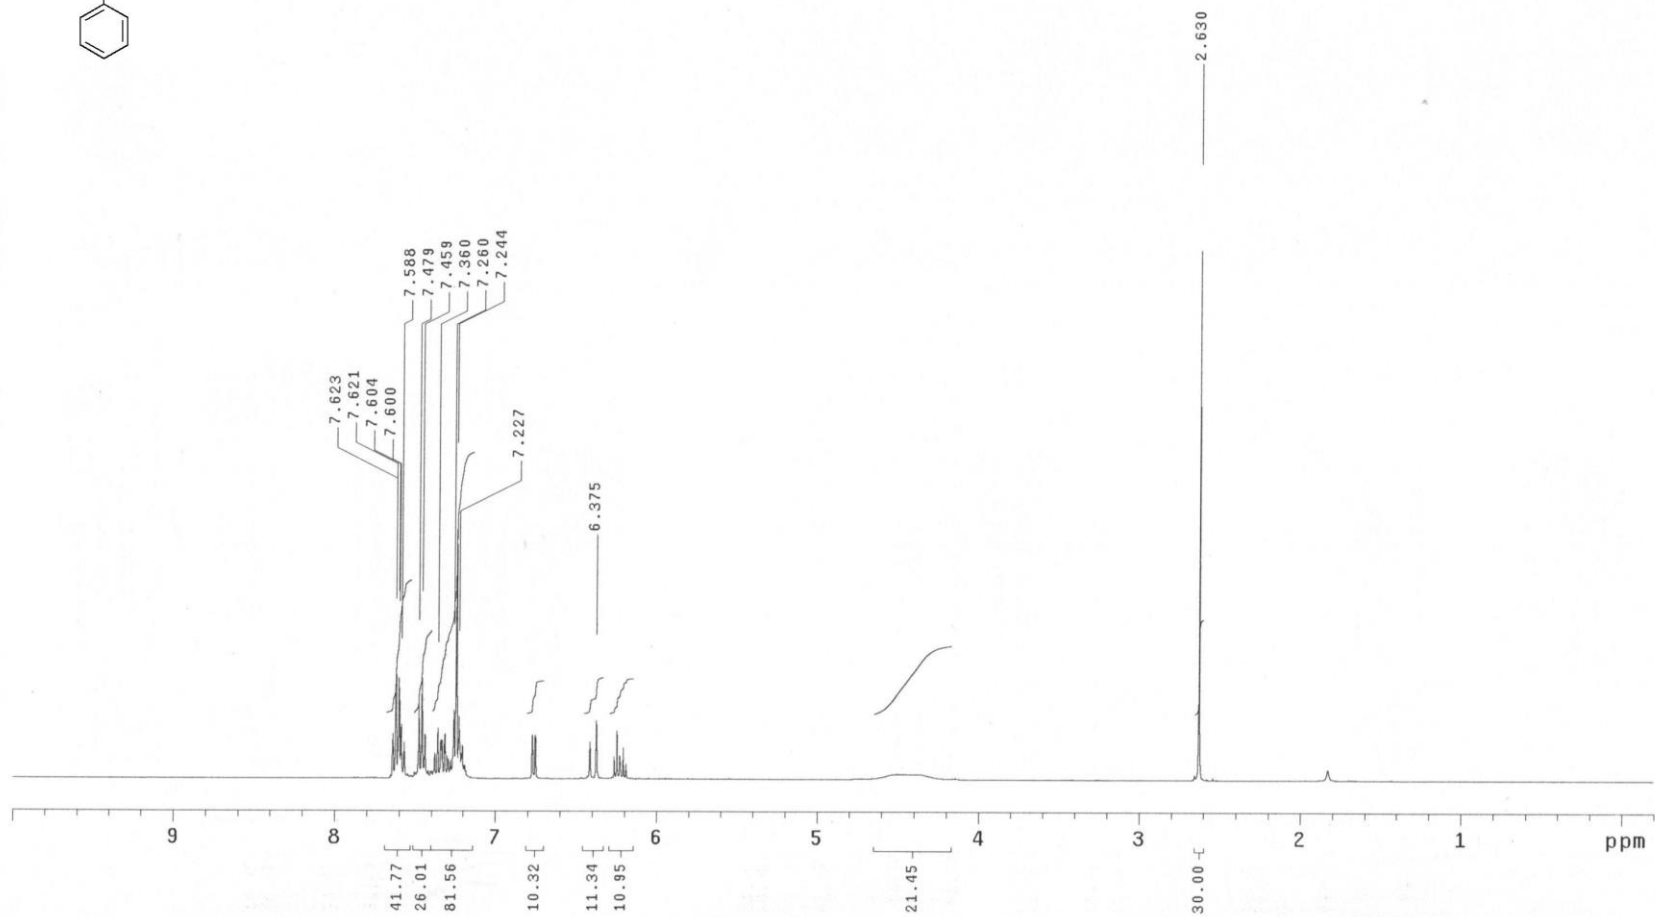



# Compound 4j (<sup>13</sup>C-NMR spectral data)

MCNBsCin

Pulse Sequence: s2pu1

UNITYplus-400 "unity400"

Date: May 15 2019

Solvent: CDCl<sub>3</sub>

Ambient temperature

Total 480 repetitions

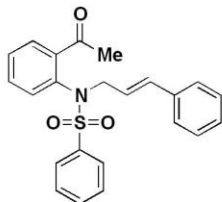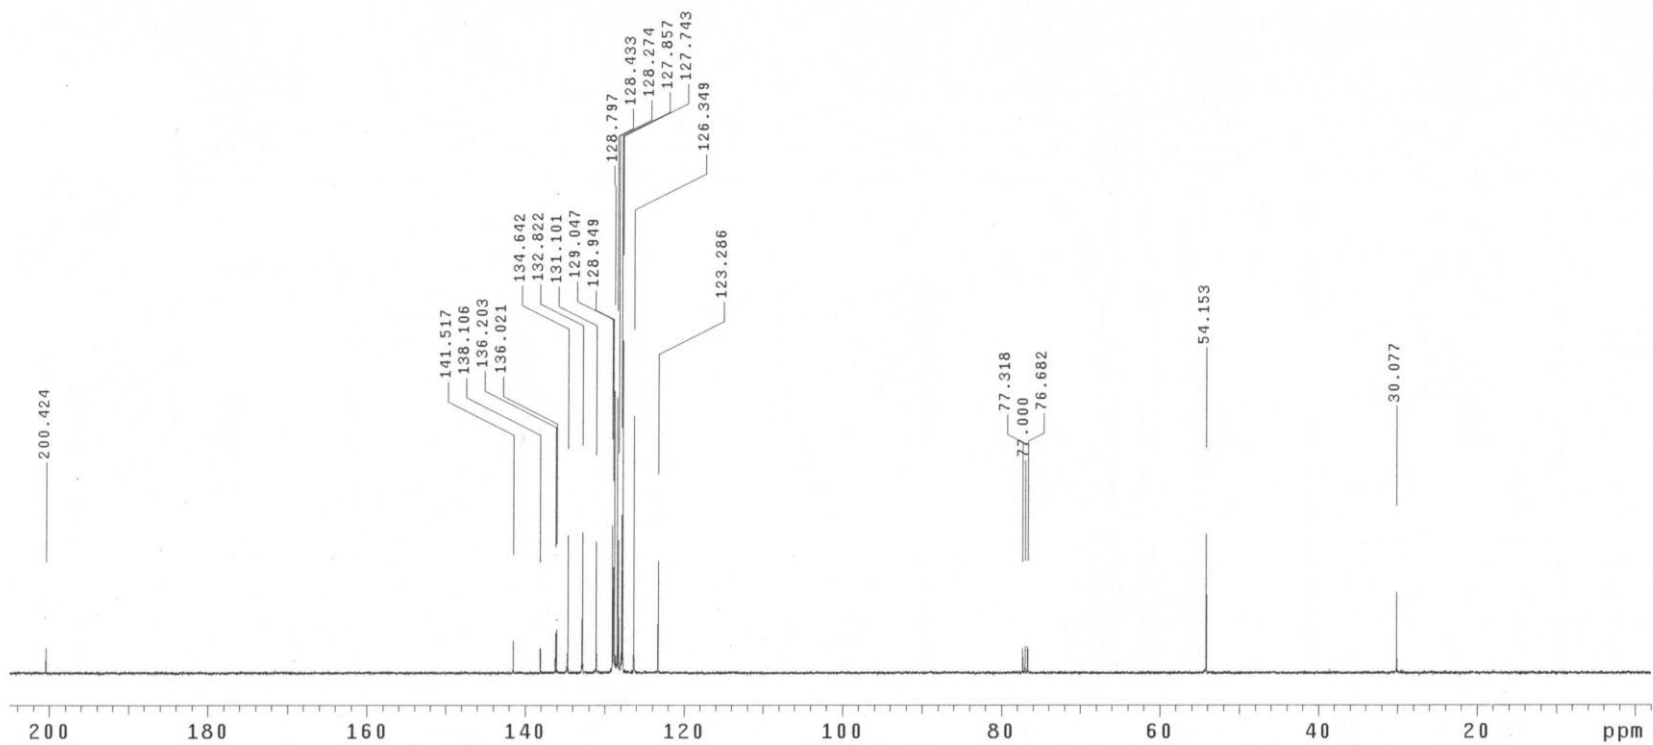

# Compound 4k (<sup>1</sup>H-NMR spectral data)

MC1080502

Pulse Sequence: s2pu1

UNITYplus-400 "unity400"

Date: May 3 2019

Solvent: CDCl<sub>3</sub>

Ambient temperature

Total 32 repetitions

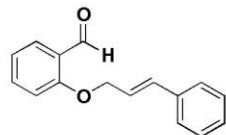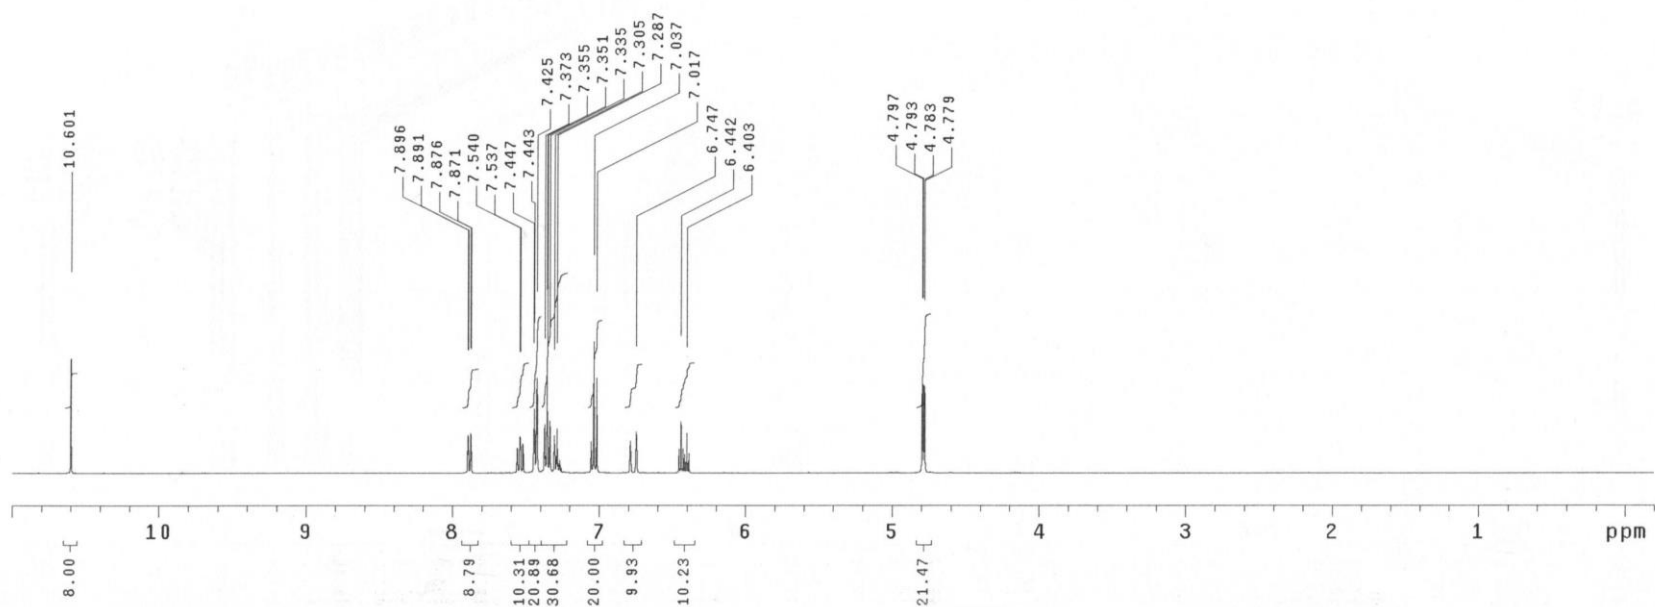

# Compound 4k (<sup>13</sup>C-NMR spectral data)

MC1080502

Pulse Sequence: s2pu1

UNITYplus-400 "unity400"

Date: May 3 2019

Solvent: CDCl<sub>3</sub>

Ambient temperature

Total 80 repetitions

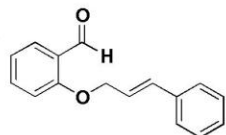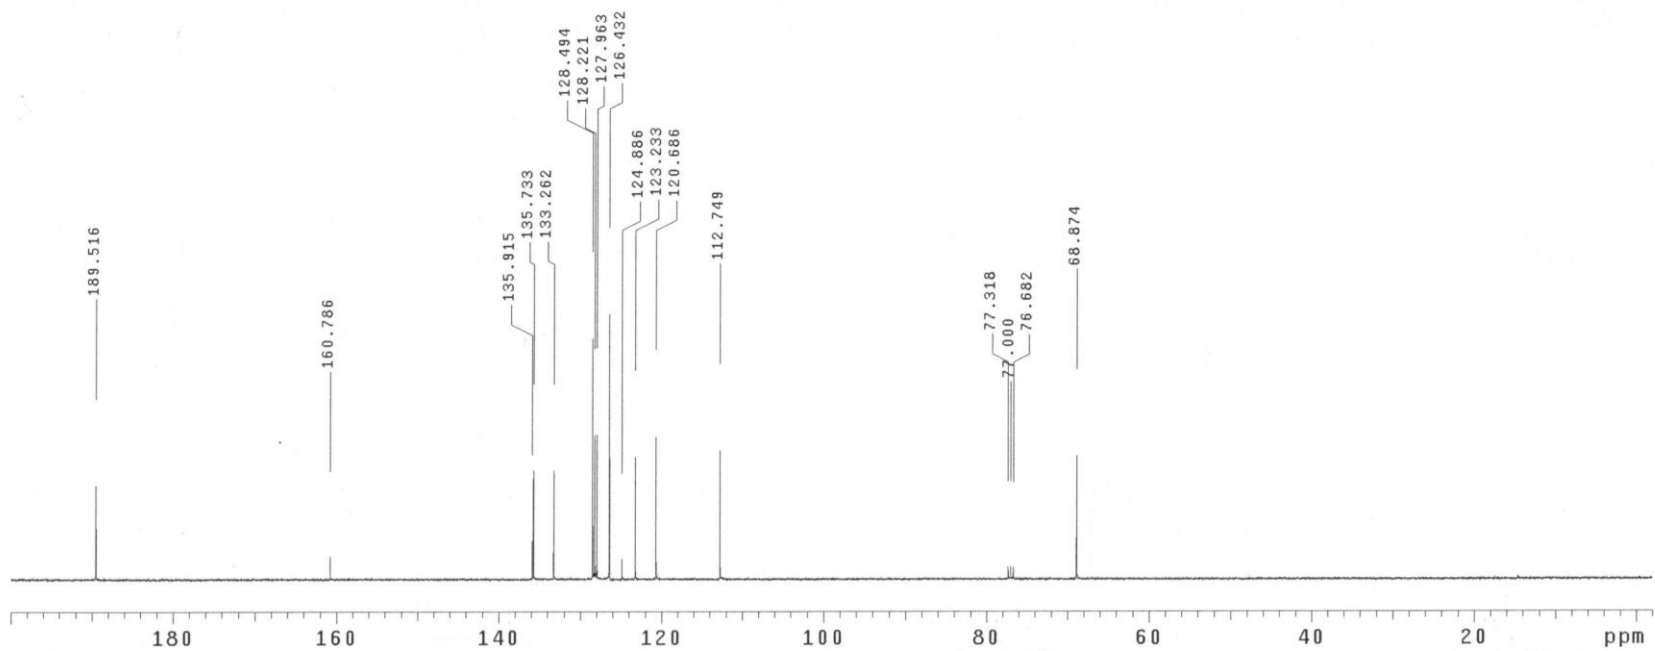

# Compound 5a (<sup>1</sup>H-NMR spectral data)

MC1071214

Pulse Sequence: s2pu1

UNITYplus-400 "unity400"

Date: Dec 14 2018

Solvent: CDCl<sub>3</sub>

Ambient temperature

Total 32 repetitions

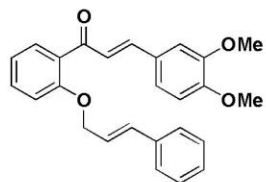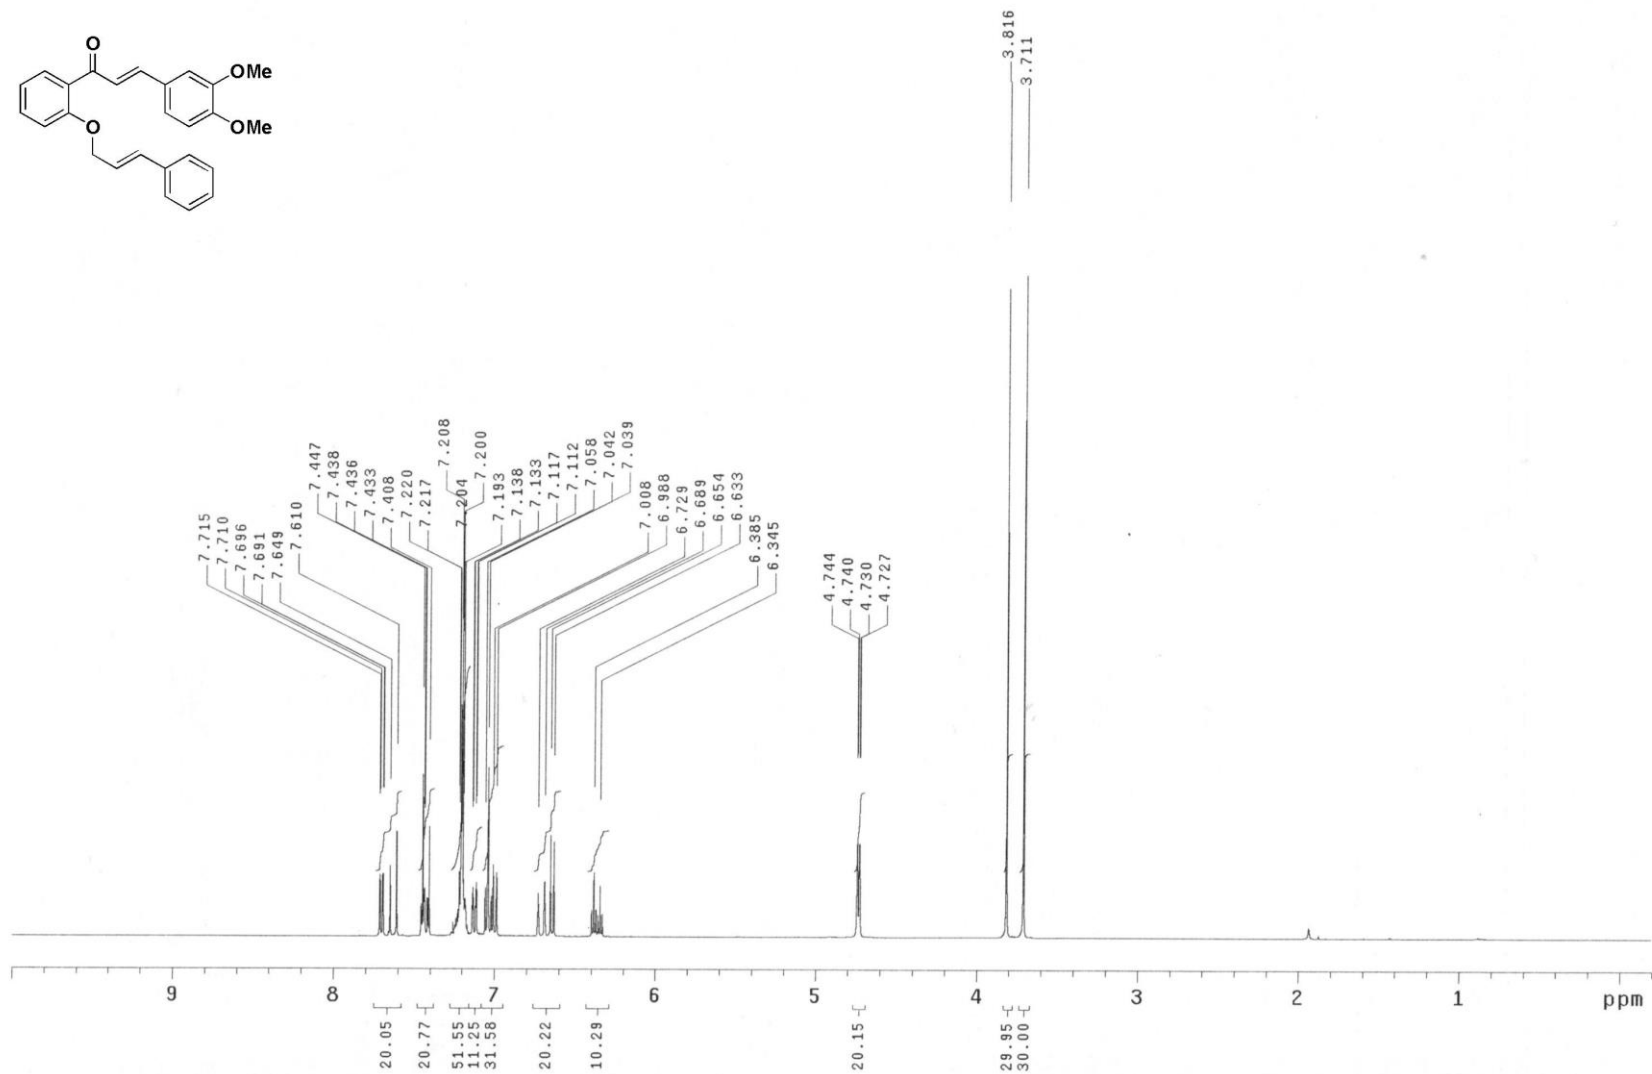

# Compound 5a (<sup>13</sup>C-NMR spectral data)

MC1071214

Pulse Sequence: s2pu1

UNITYplus-400 "unity400"

Date: Dec 14 2018

Solvent: CDCl<sub>3</sub>

Ambient temperature

Total 576 repetitions

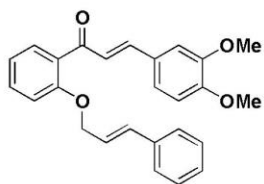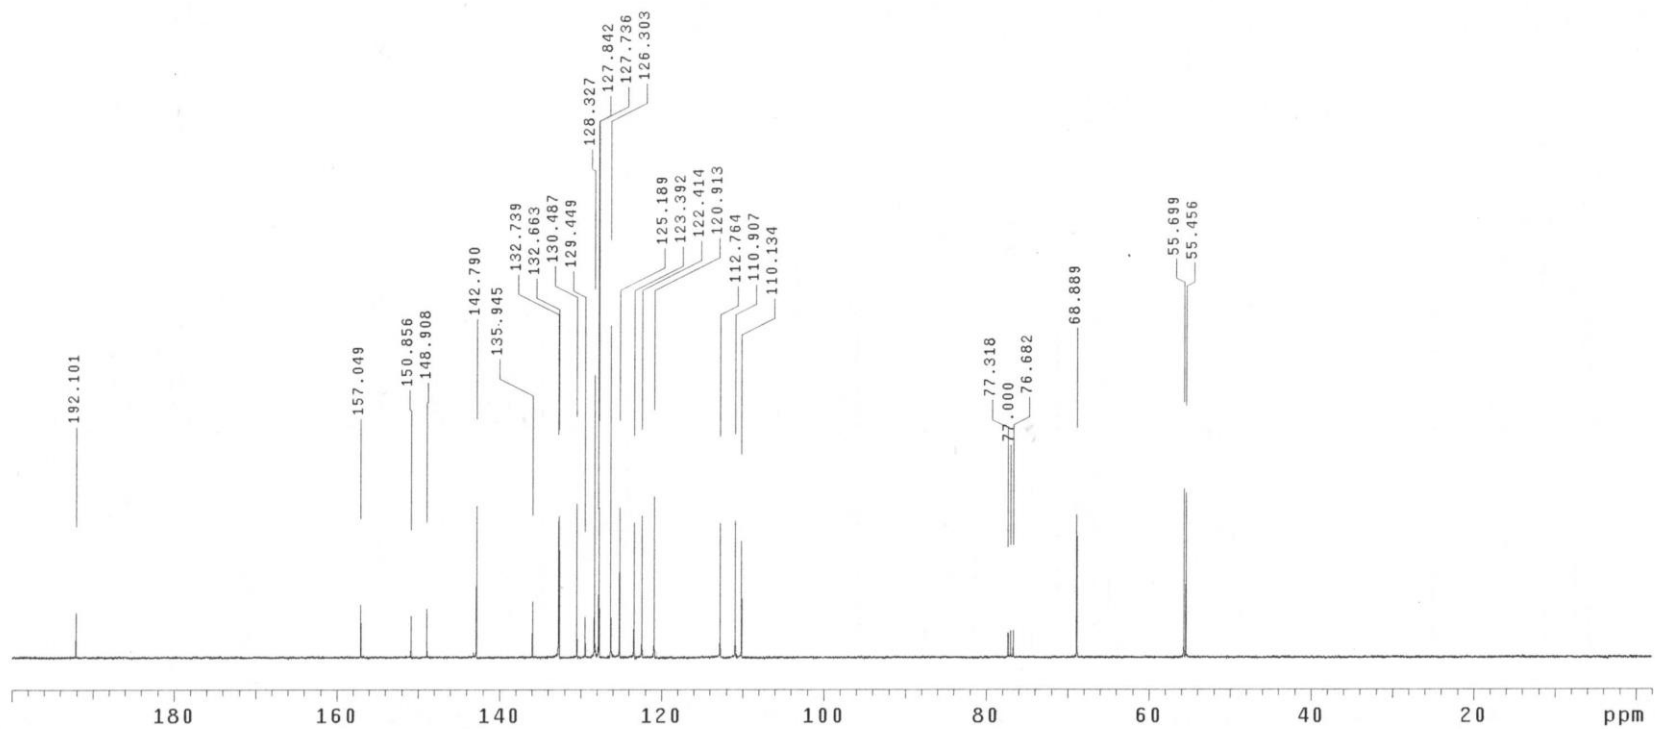

# Compound 5b (<sup>1</sup>H-NMR spectral data)

MC1080114

Pulse Sequence: s2pu1  
UNITYplus-400 "unity400"  
Date: Jan 14 2019  
Solvent: CDCl<sub>3</sub>  
Ambient temperature  
Total 32 repetitions

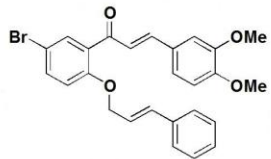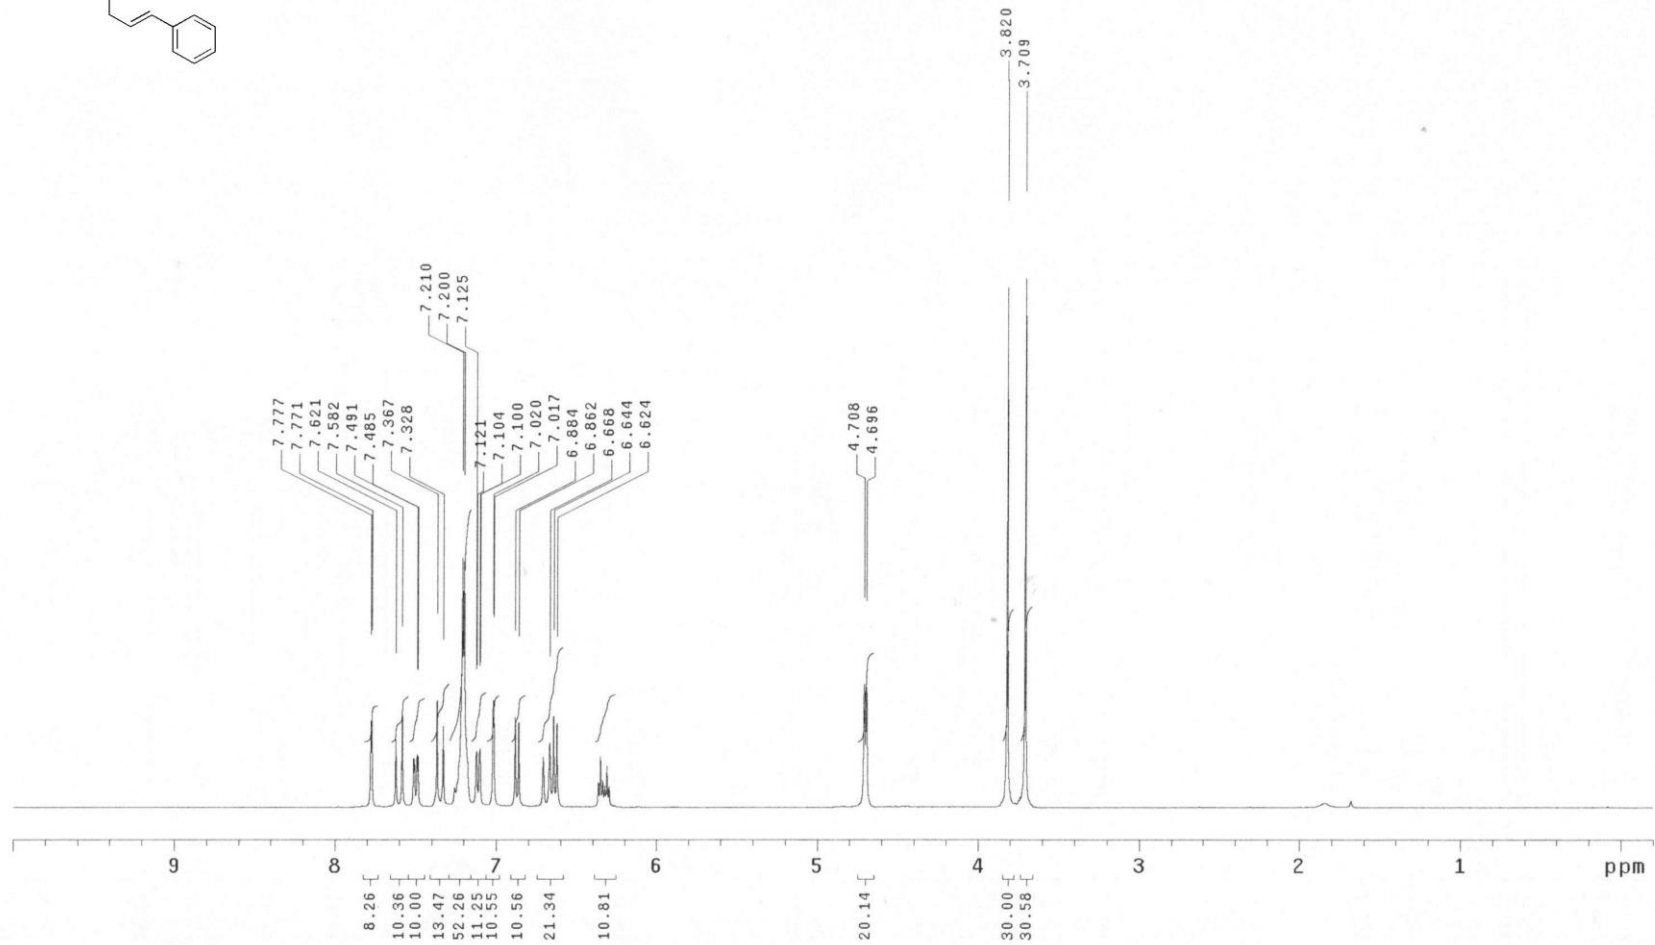

# Compound 5b (<sup>13</sup>C-NMR spectral data)

MC1080114

Pulse Sequence: s2pu1

UNITYplus-400 "unity400"

Date: Jan 14 2019

Solvent: CDCl<sub>3</sub>

Ambient temperature

Total 256 repetitions

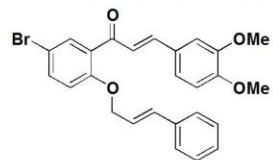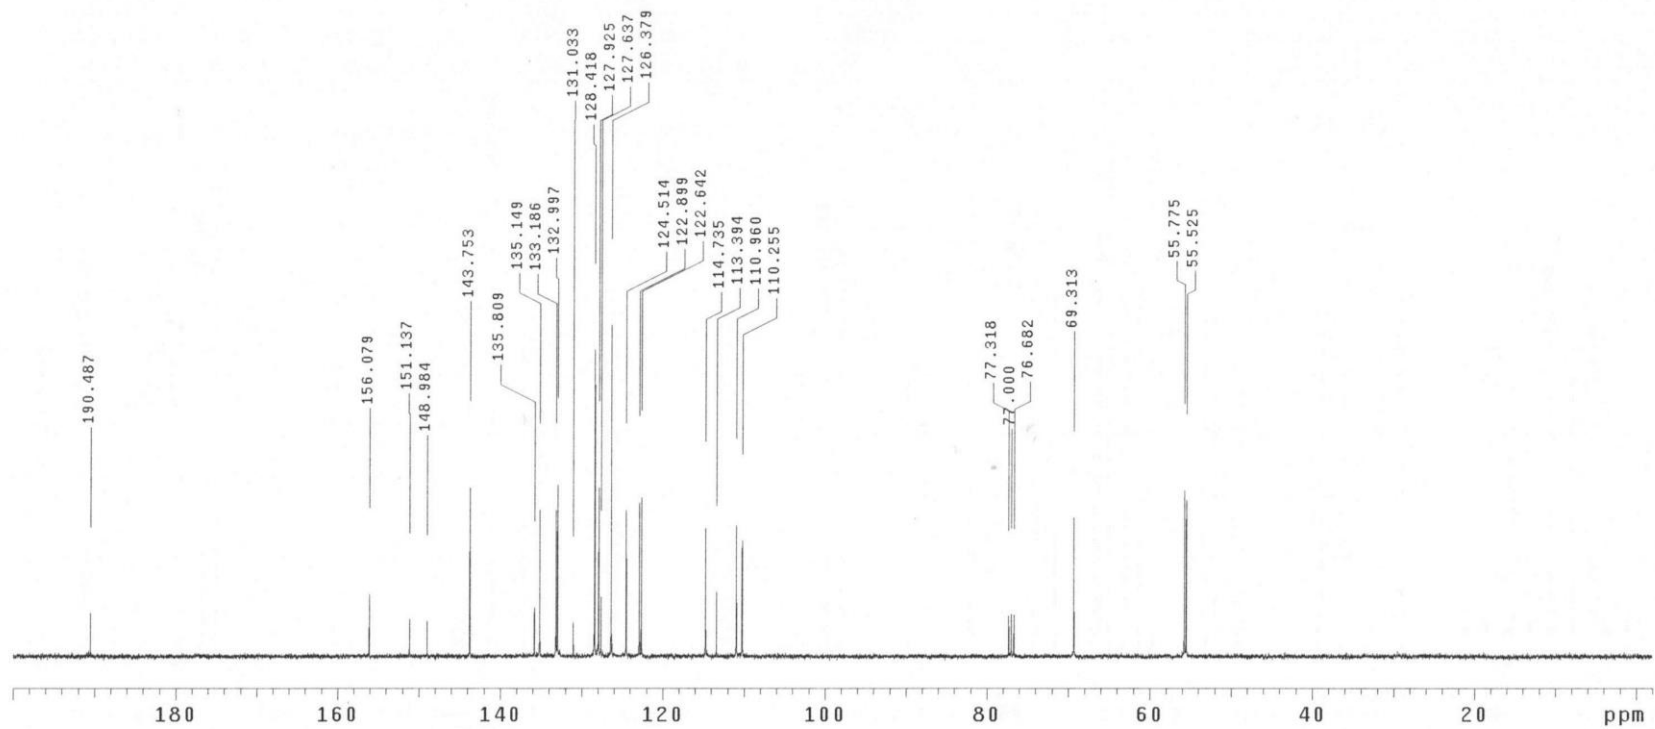

# Compound 5c (<sup>1</sup>H-NMR spectral data)

MCaldo1C1  
Pulse Sequence: s2pu1  
UNITYplus-400 "unity400"  
Date: May 16 2019  
Solvent: CDCl3  
Ambient temperature  
Total 32 repetitions

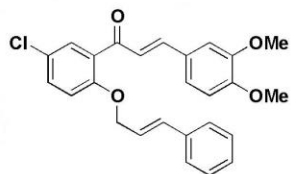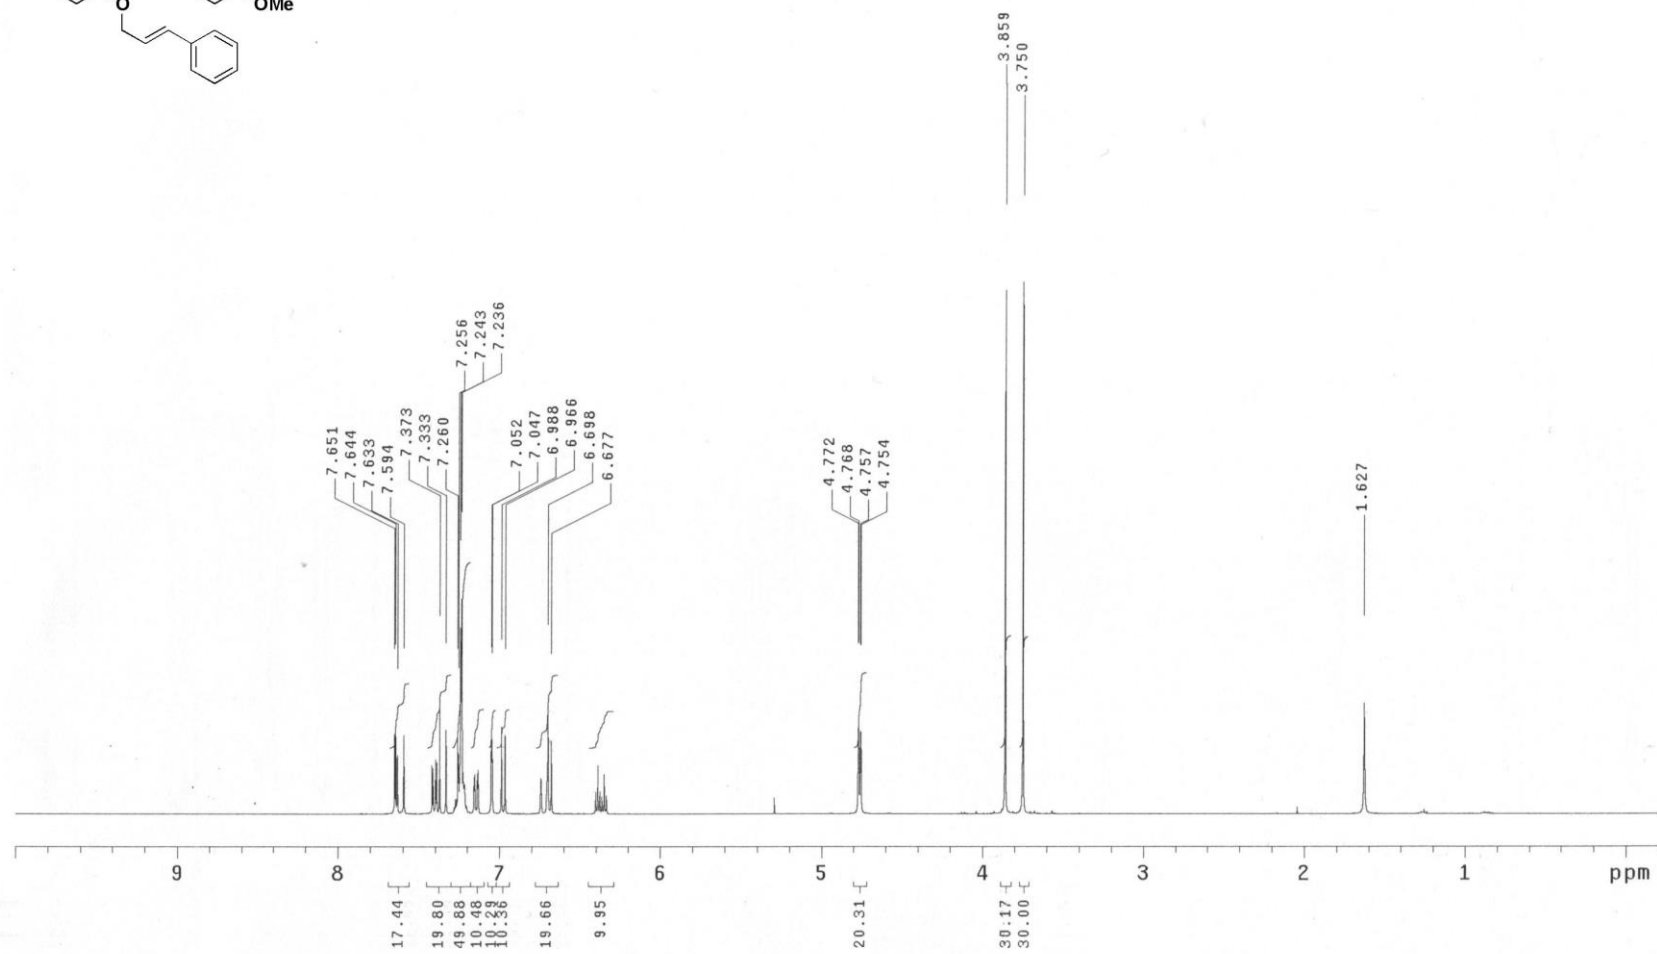



# Compound 5c (<sup>13</sup>C-NMR spectral data)

MCa1do1C1

Pulse Sequence: s2pu1

UNITYplus-400 "unity400"

Date: May 16 2019

Solvent: CDCl<sub>3</sub>

Ambient temperature

Total 4368 repetitions

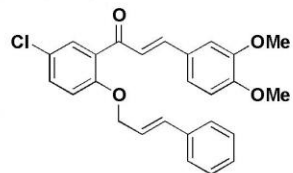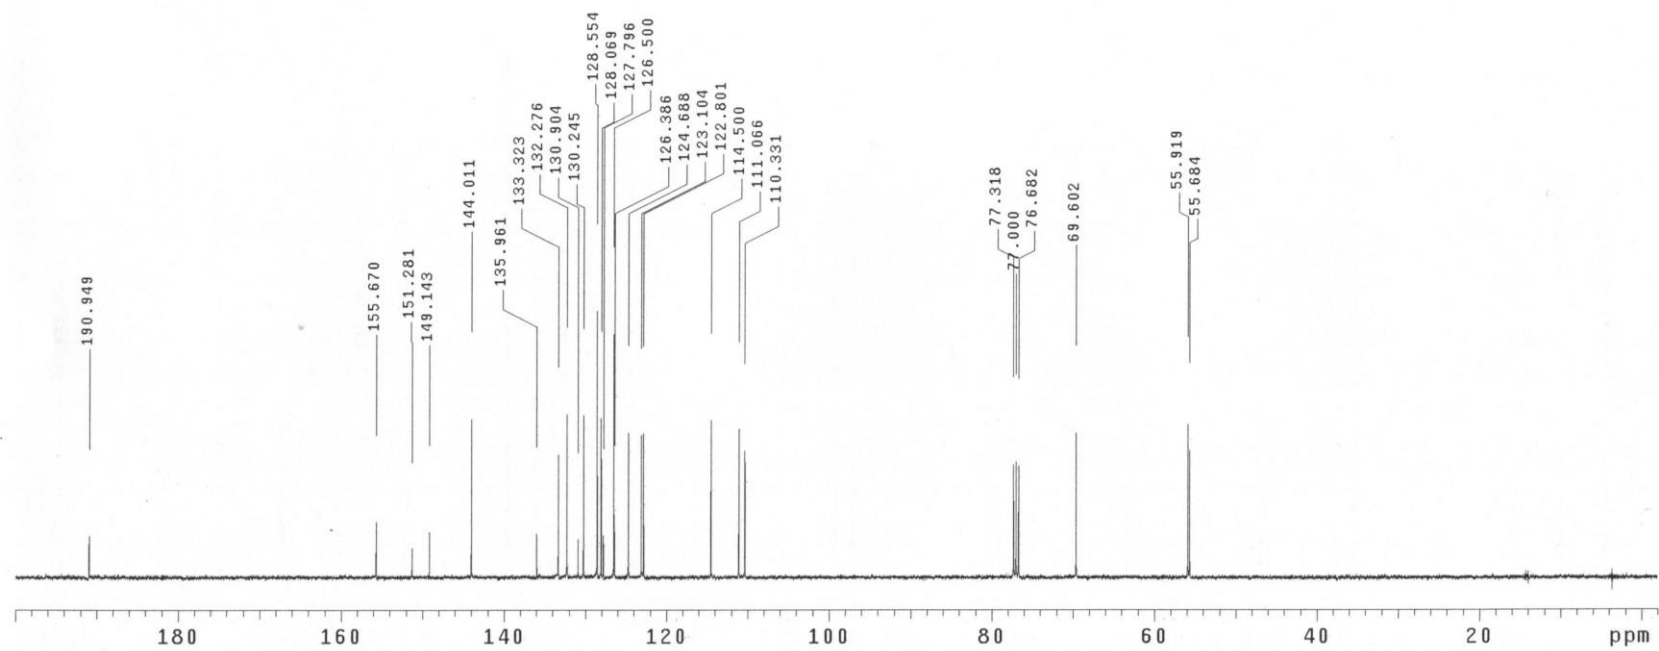

# Compound 5d (<sup>1</sup>H-NMR spectral data)

MC1080129

Pulse Sequence: s2pu1  
UNITYplus-400 "unity400"  
Date: Jan 31 2019  
Solvent: CDCl3  
Ambient temperature  
Total 32 repetitions

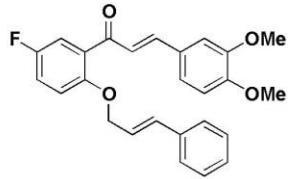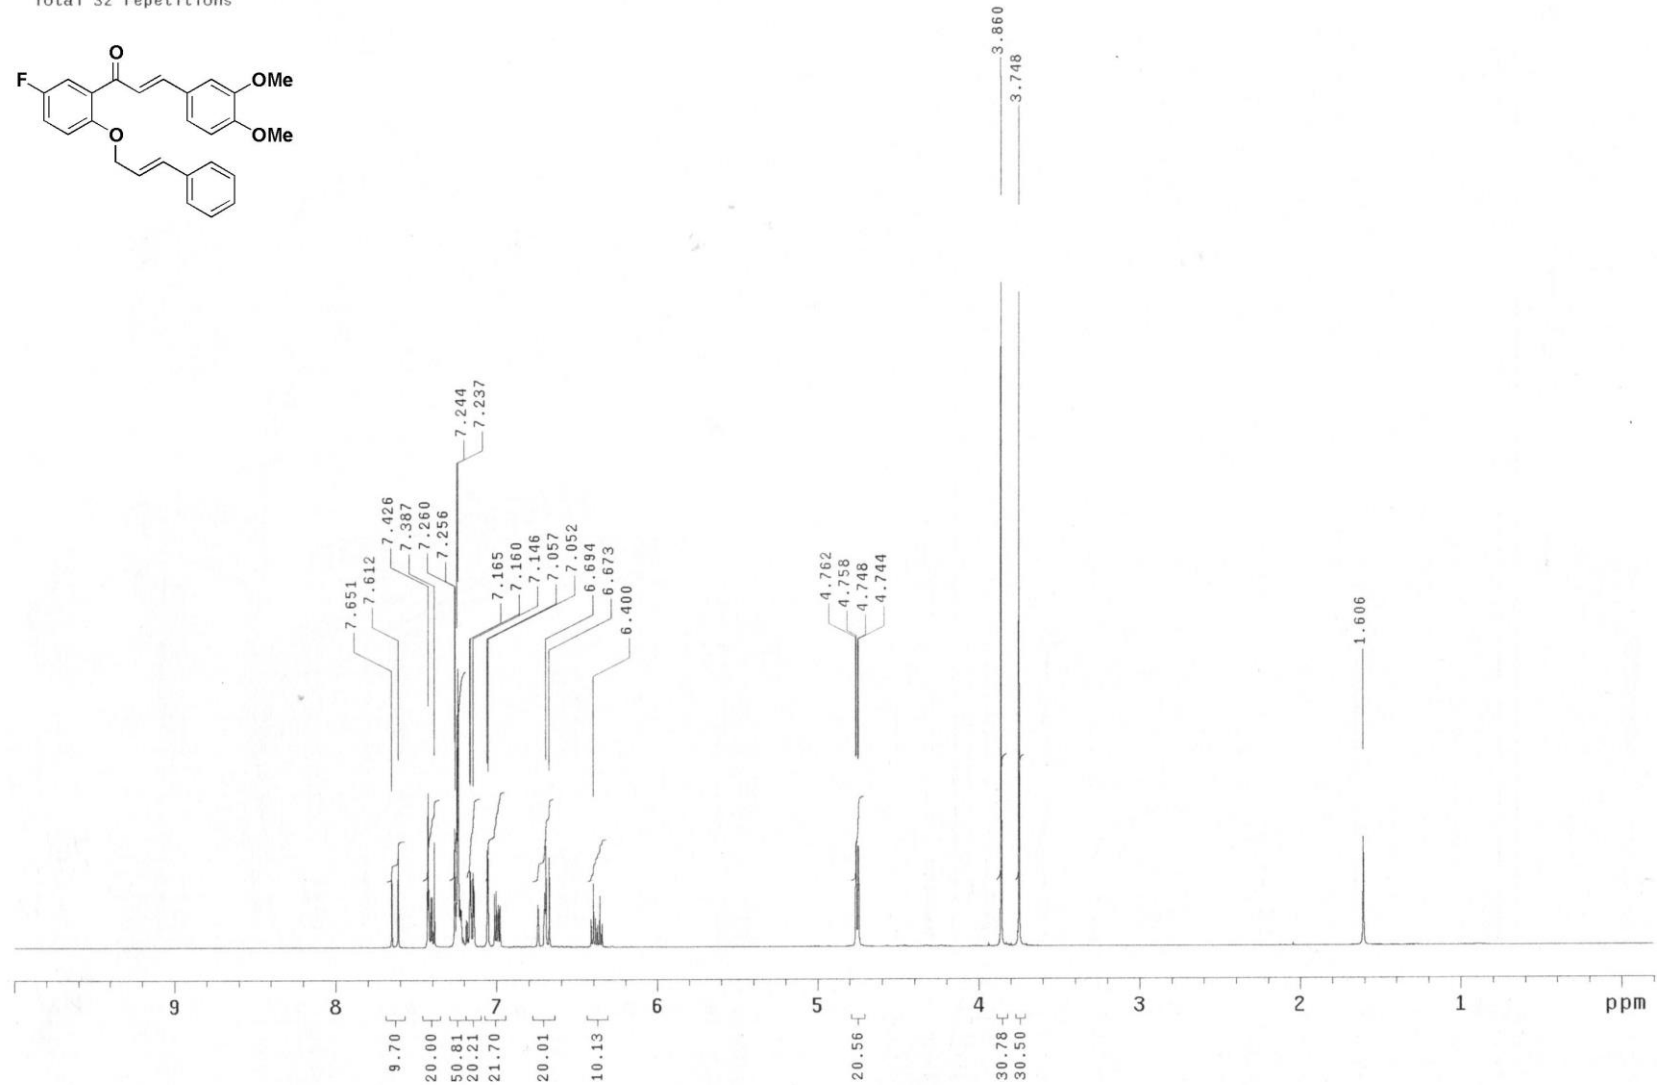

# Compound 5d (<sup>13</sup>C-NMR spectral data)

MC1080129

Pulse Sequence: s2pu1  
UNITYplus-400 "unity400"  
Date: Jan 31 2019  
Solvent: CDCl<sub>3</sub>  
Ambient temperature  
Total 5248 repetitions

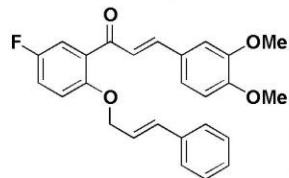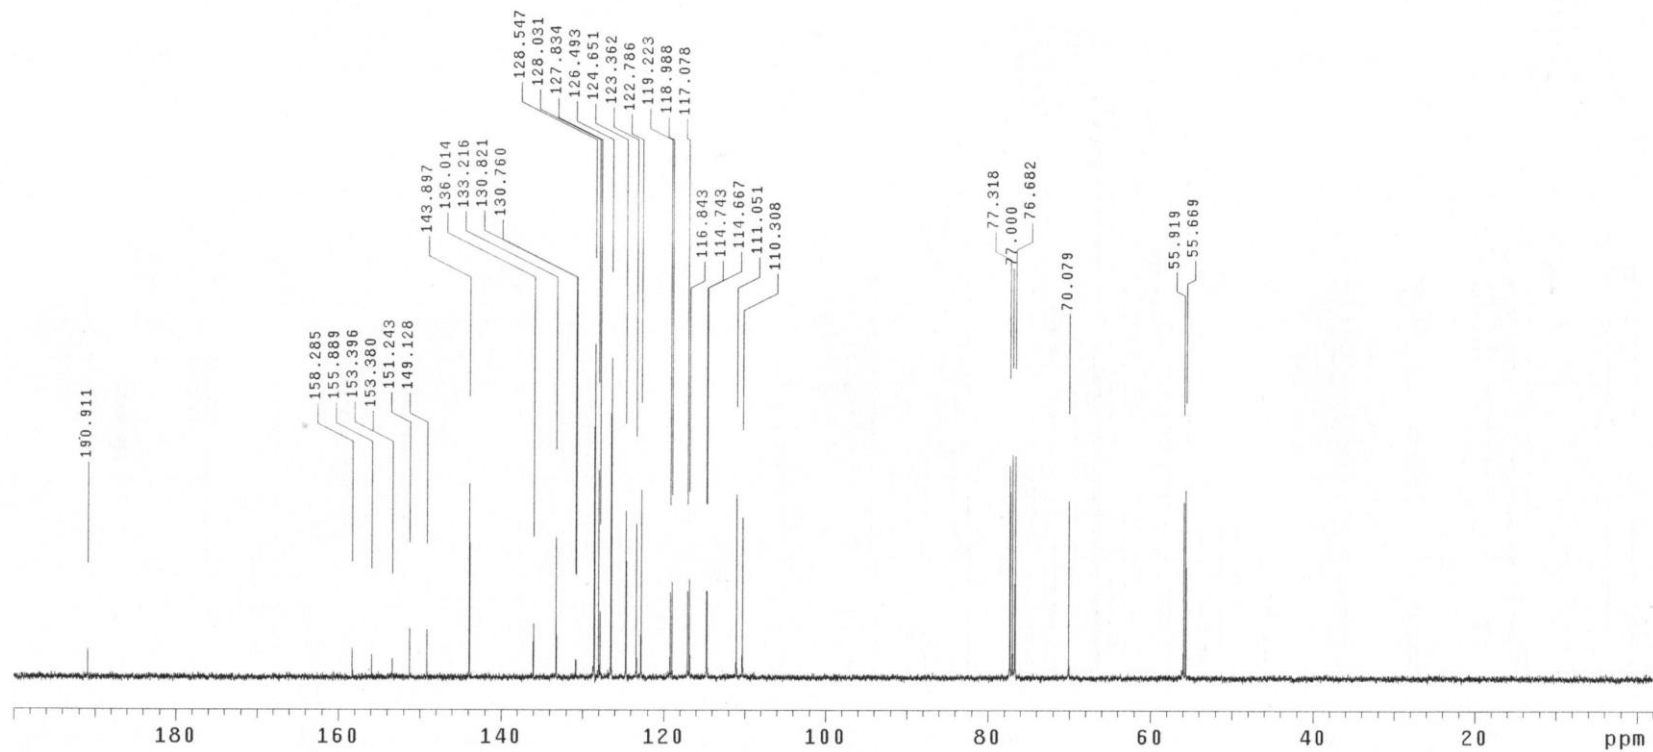

# Compound 5e (<sup>1</sup>H-NMR spectral data)

MC1080118

Pulse Sequence: s2pu1  
UNITYplus-400 "unity400"  
Date: Jan 22 2019  
Solvent: CDCl<sub>3</sub>  
Ambient temperature  
Total 32 repetitions

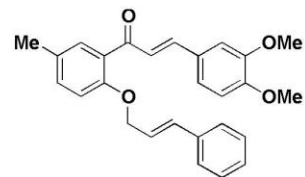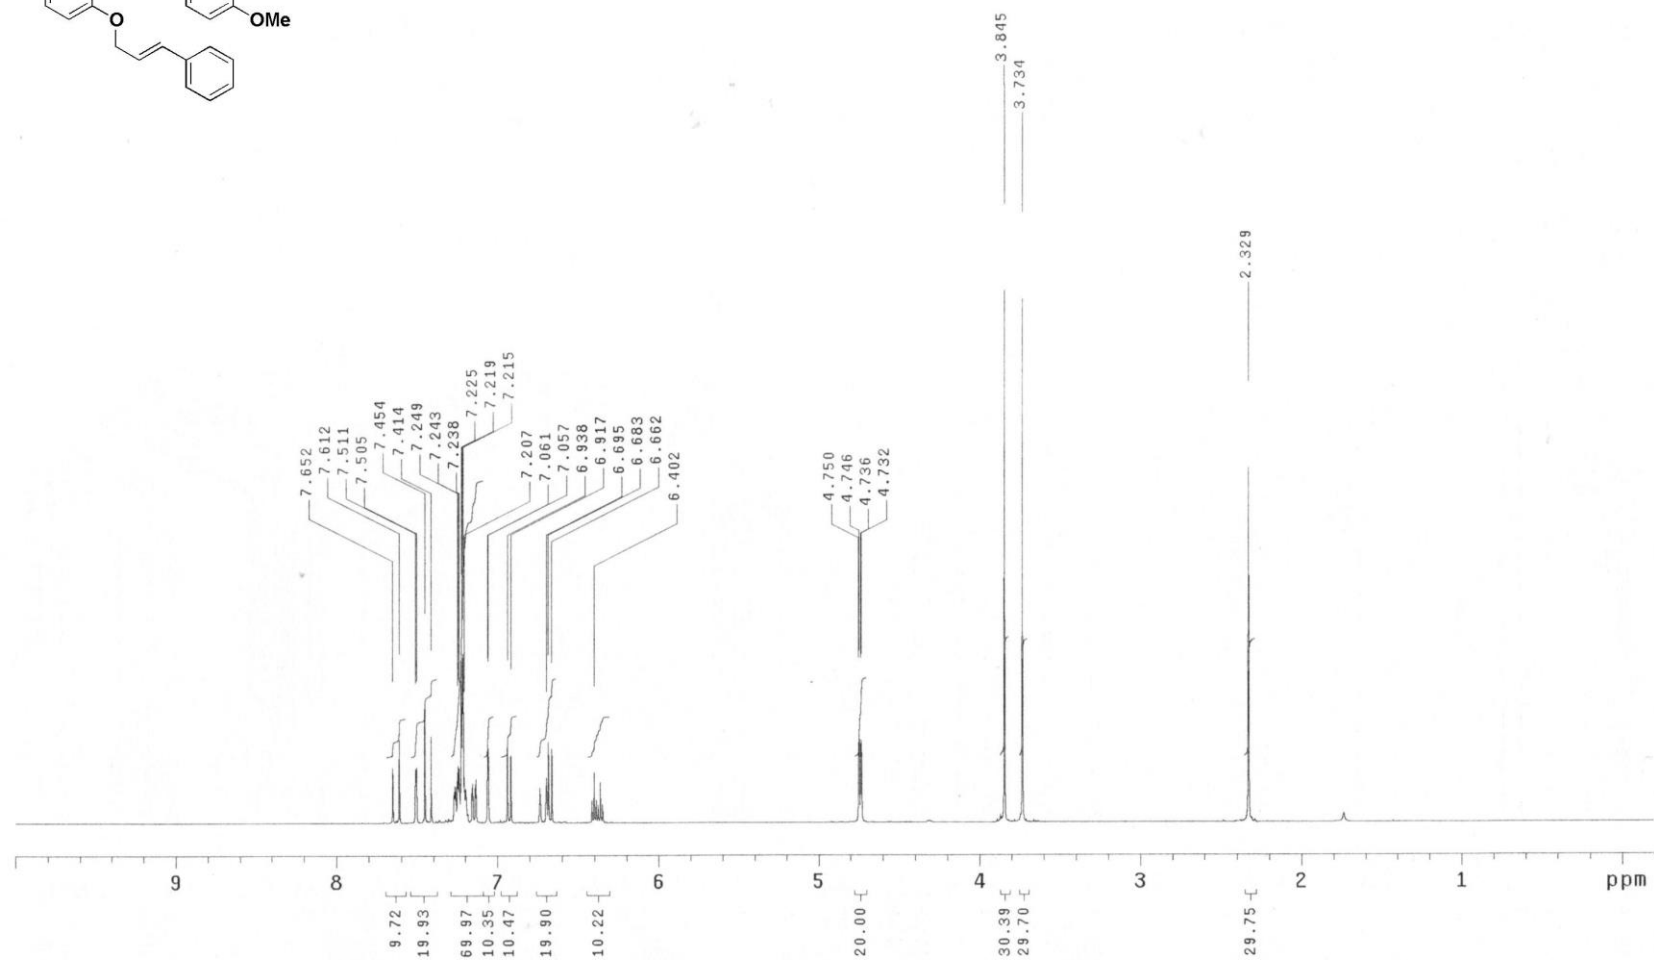

# Compound 5e (<sup>13</sup>C-NMR spectral data)

MC1080118

Pulse Sequence: s2pu1  
UNITYplus-400 "unity400"  
Date: Jan 22 2019  
Solvent: CDCl<sub>3</sub>  
Ambient temperature  
Total 944 repetitions

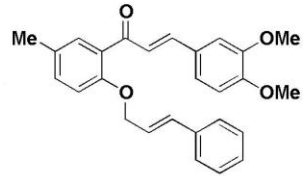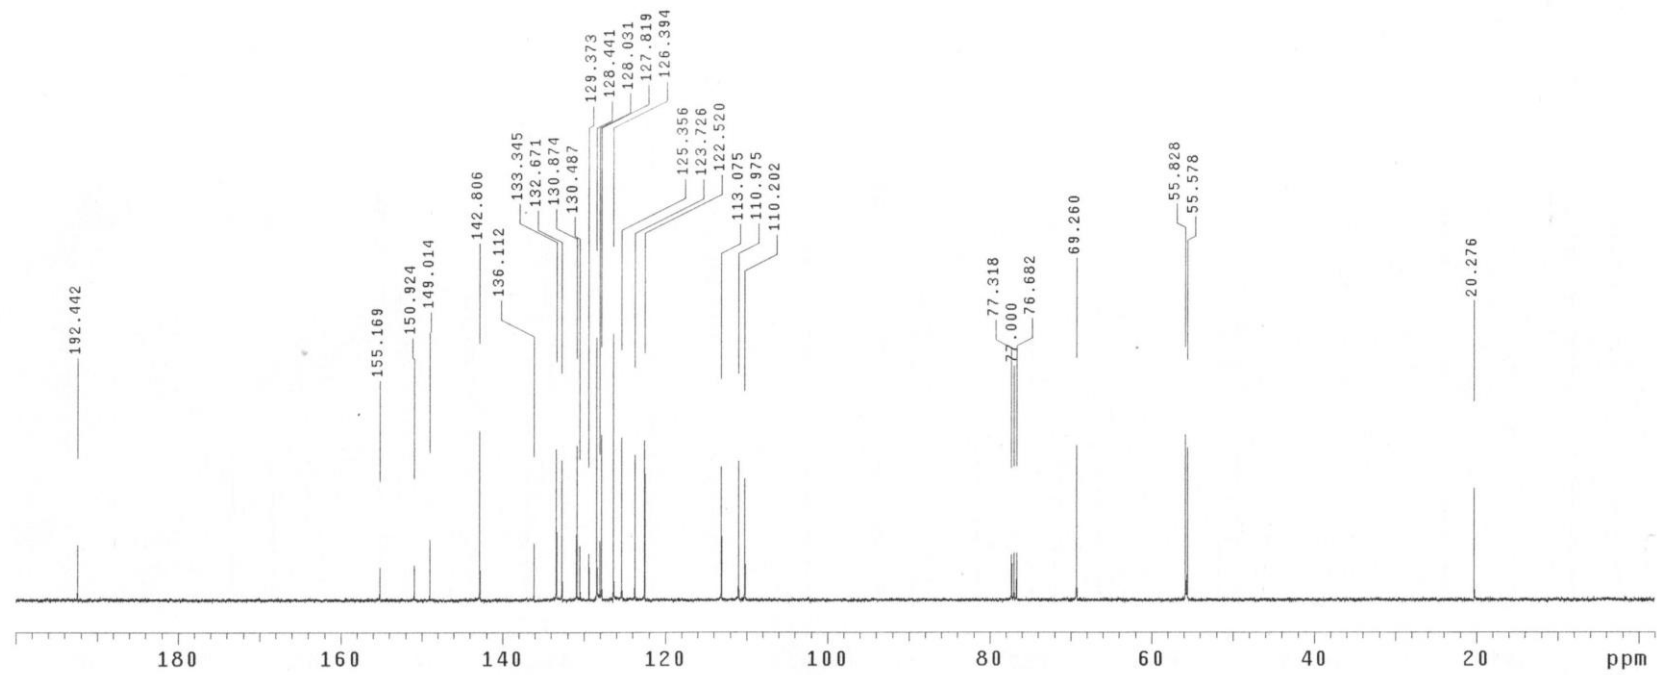

# Compound 5f (<sup>1</sup>H-NMR spectral data)

MC1080211

Pulse Sequence: s2pu1

UNITYplus-400 "unity400"

Date: Feb 12 2019

Solvent: CDCl<sub>3</sub>

Ambient temperature

Total 32 repetitions

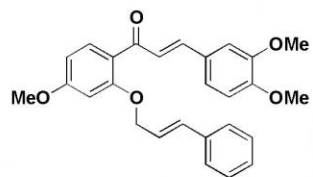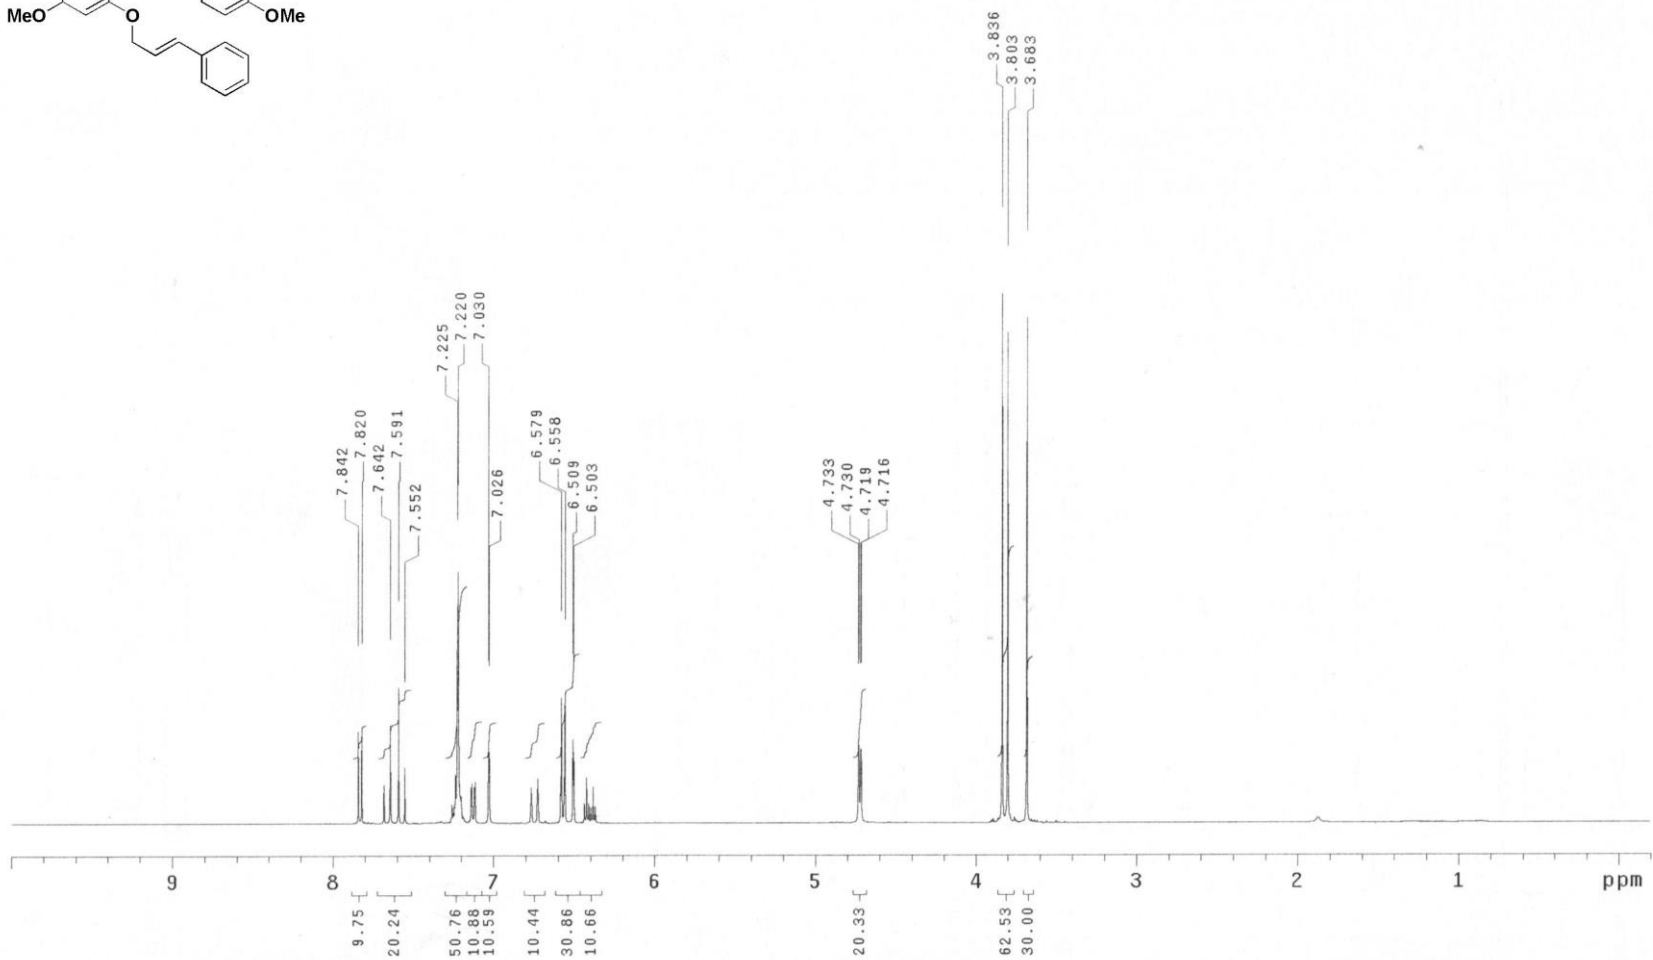

# Compound 5f (<sup>13</sup>C-NMR spectral data)

MC1080211

Pulse Sequence: s2pu1

UNITYplus-400 "unity400"

Date: Feb 12 2019

Solvent: CDCl<sub>3</sub>

Ambient temperature

Total 256 repetitions

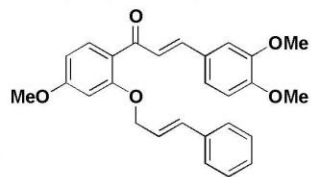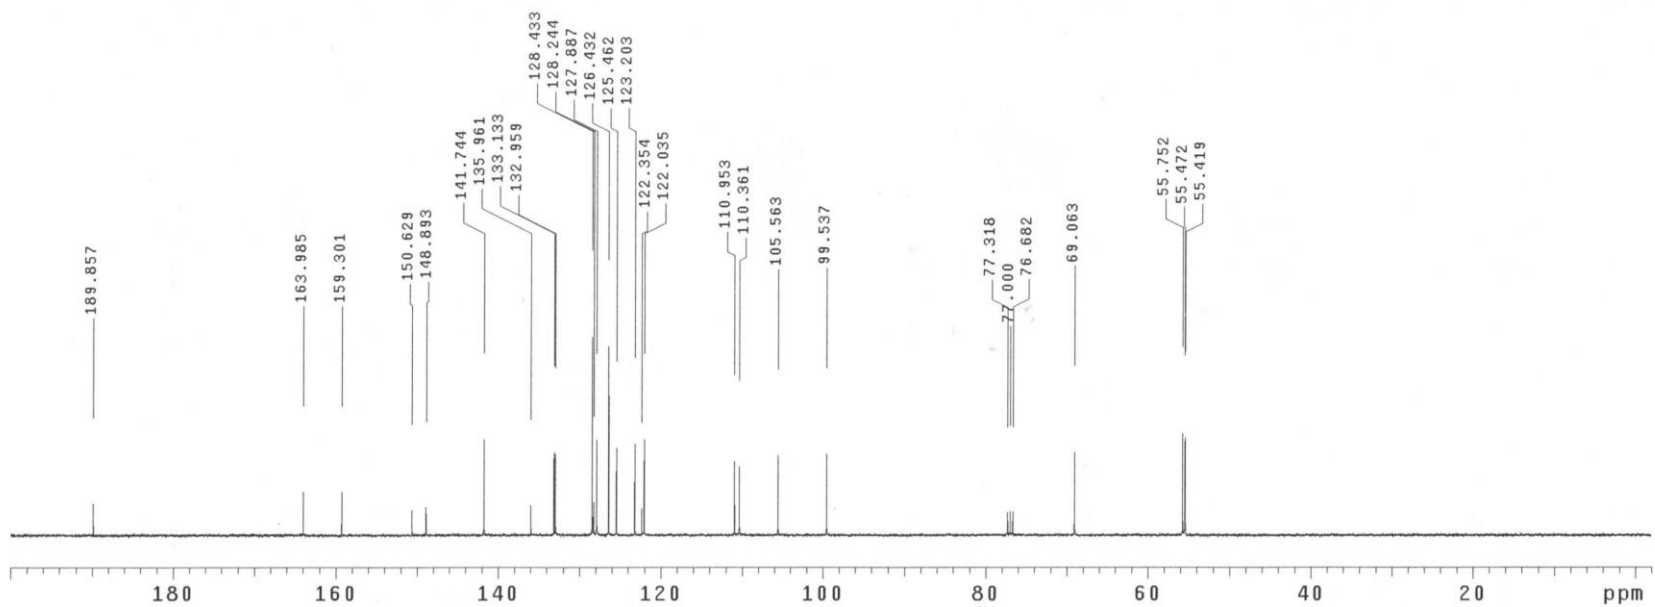

# Compound 5g (<sup>1</sup>H-NMR spectral data)

MC1080213

Pulse Sequence: s2pul  
UNITYplus-400 "unity400"  
Date: Feb 14 2019  
Solvent: CDCl<sub>3</sub>  
Ambient temperature  
Total 32 repetitions

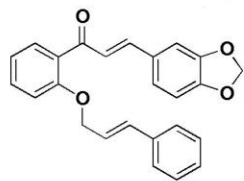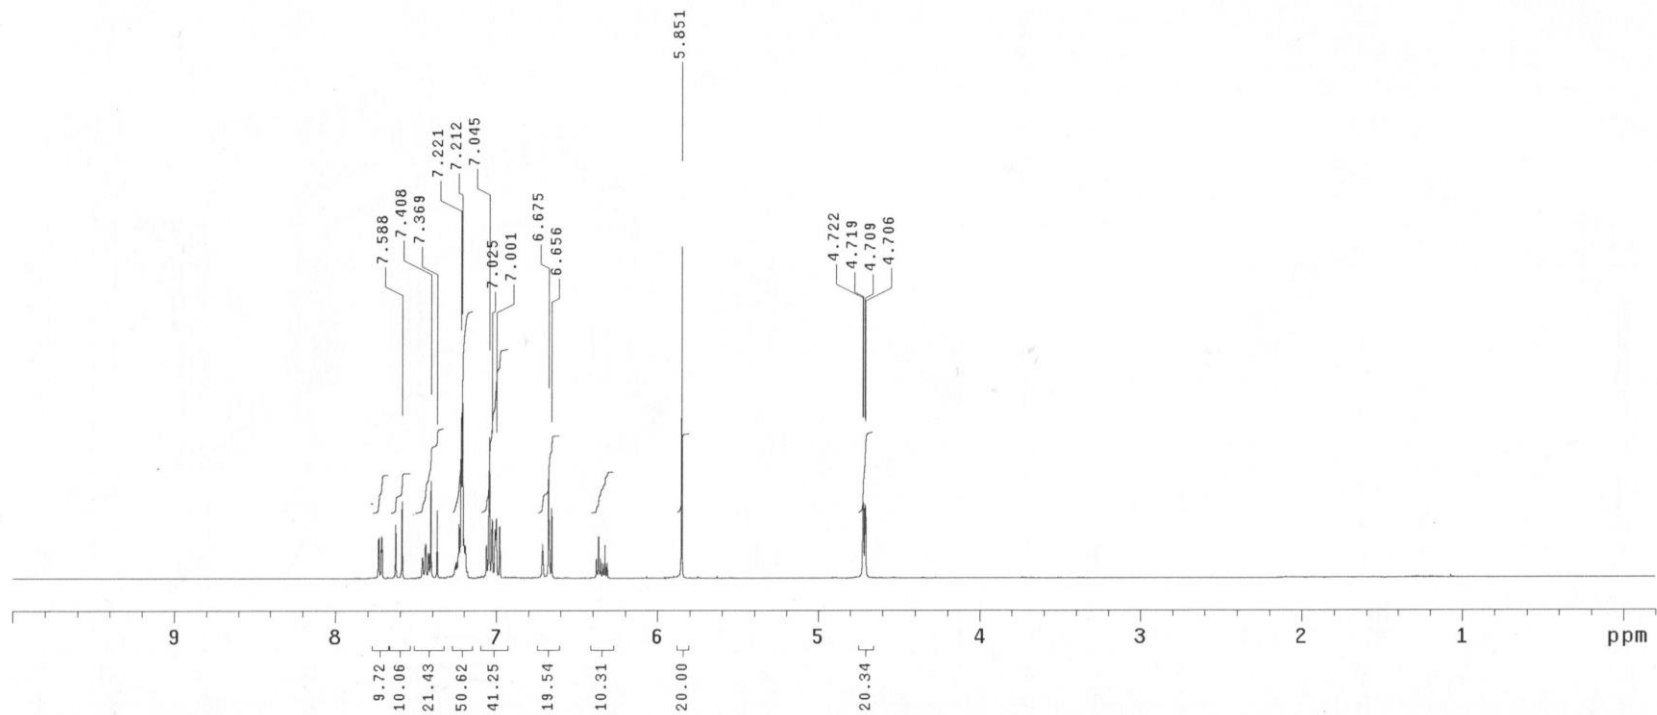



# Compound 5g (<sup>13</sup>C-NMR spectral data)

MC1080213

Pulse Sequence: s2pu1

UNITYplus-400 "unity400"

Date: Feb 14 2019

Solvent: CDCl<sub>3</sub>

Ambient temperature

Total 64000 repetitions

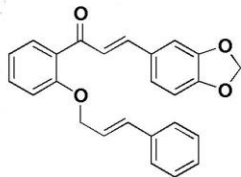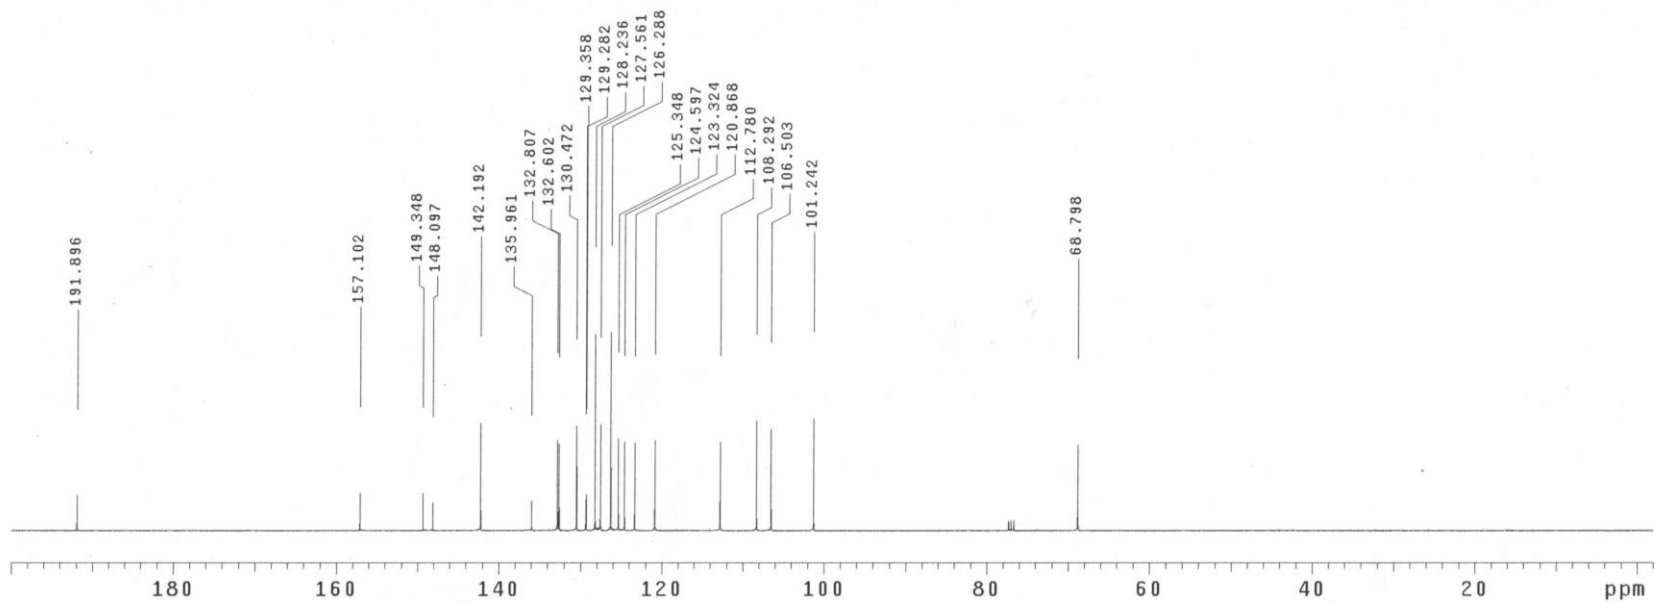

# Compound 5h (<sup>1</sup>H-NMR spectral data)

MC1080214

Pulse Sequence: s2pu1

UNITYplus-400 "unity400"

Date: Feb 15 2019

Solvent: CDCl<sub>3</sub>

Ambient temperature

Total 32 repetitions

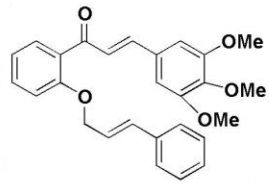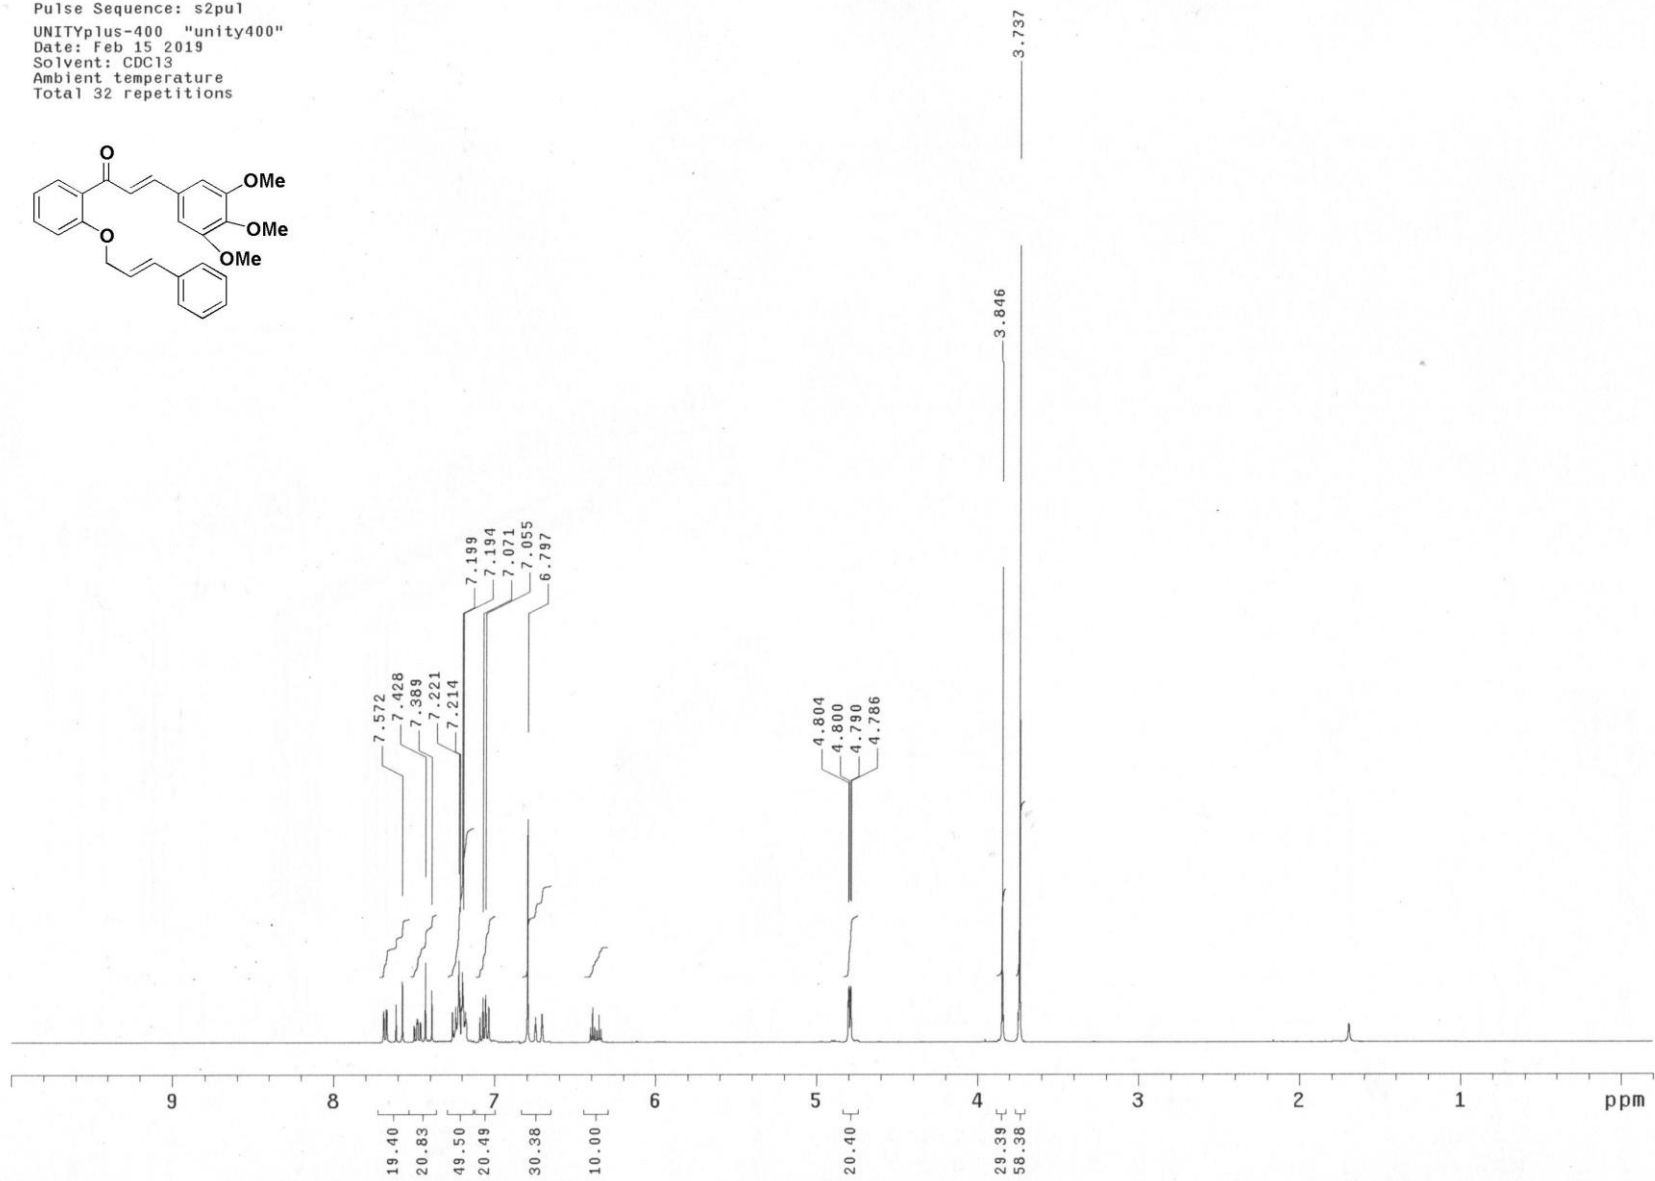

# Compound 5h (<sup>13</sup>C-NMR spectral data)

MC1080214

Pulse Sequence: s2pu1  
UNITYplus-400 "unity400"  
Date: Feb 15 2019  
Solvent: CDCl<sub>3</sub>  
Ambient temperature  
Total 816 repetitions

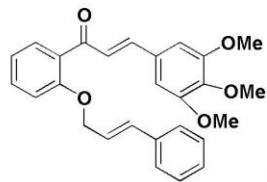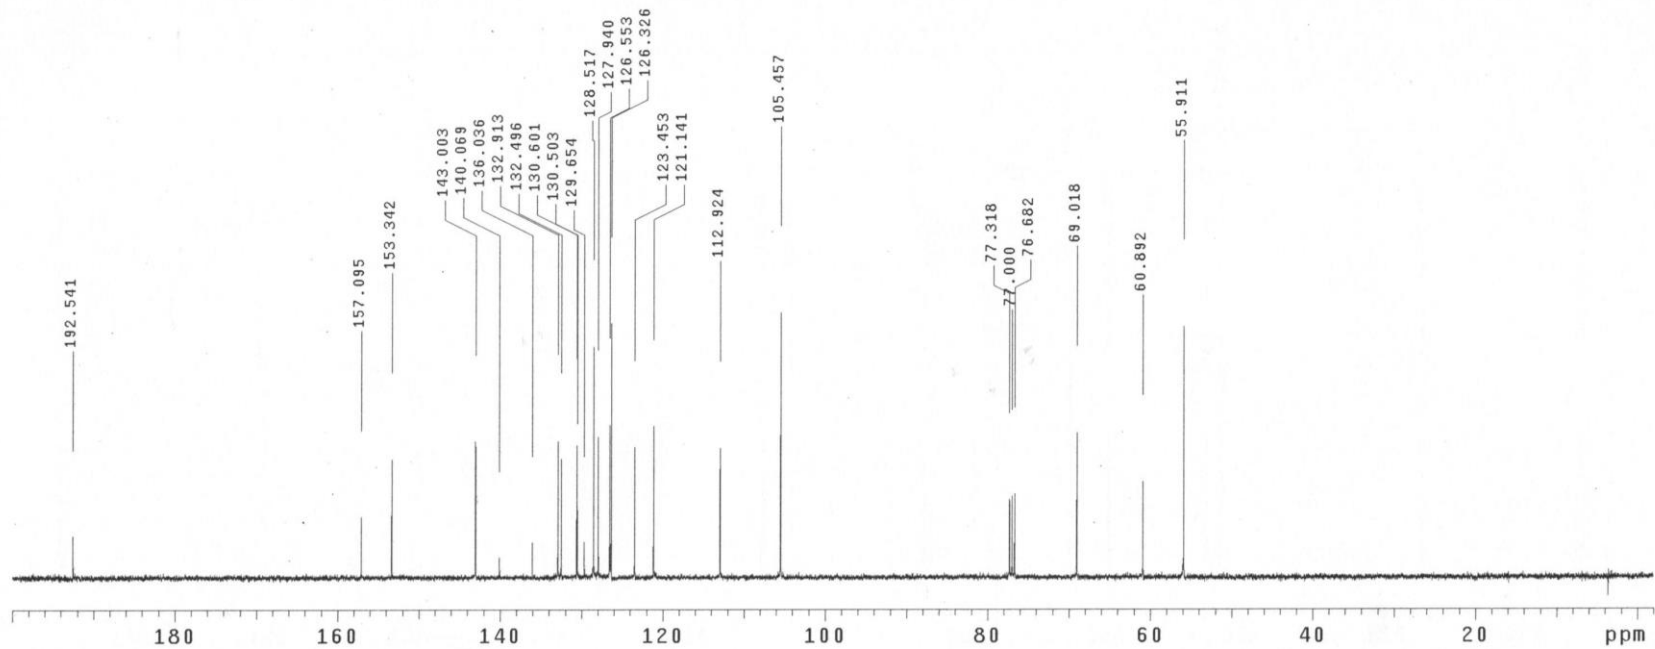

# Compound 5i (<sup>1</sup>H-NMR spectral data)

MC10Me

Pulse Sequence: s2pu1  
UNITYplus-400 "unity400"  
Date: Feb 15 2019  
Solvent: CDCl<sub>3</sub>  
Ambient temperature  
Total 32 repetitions

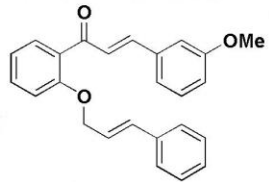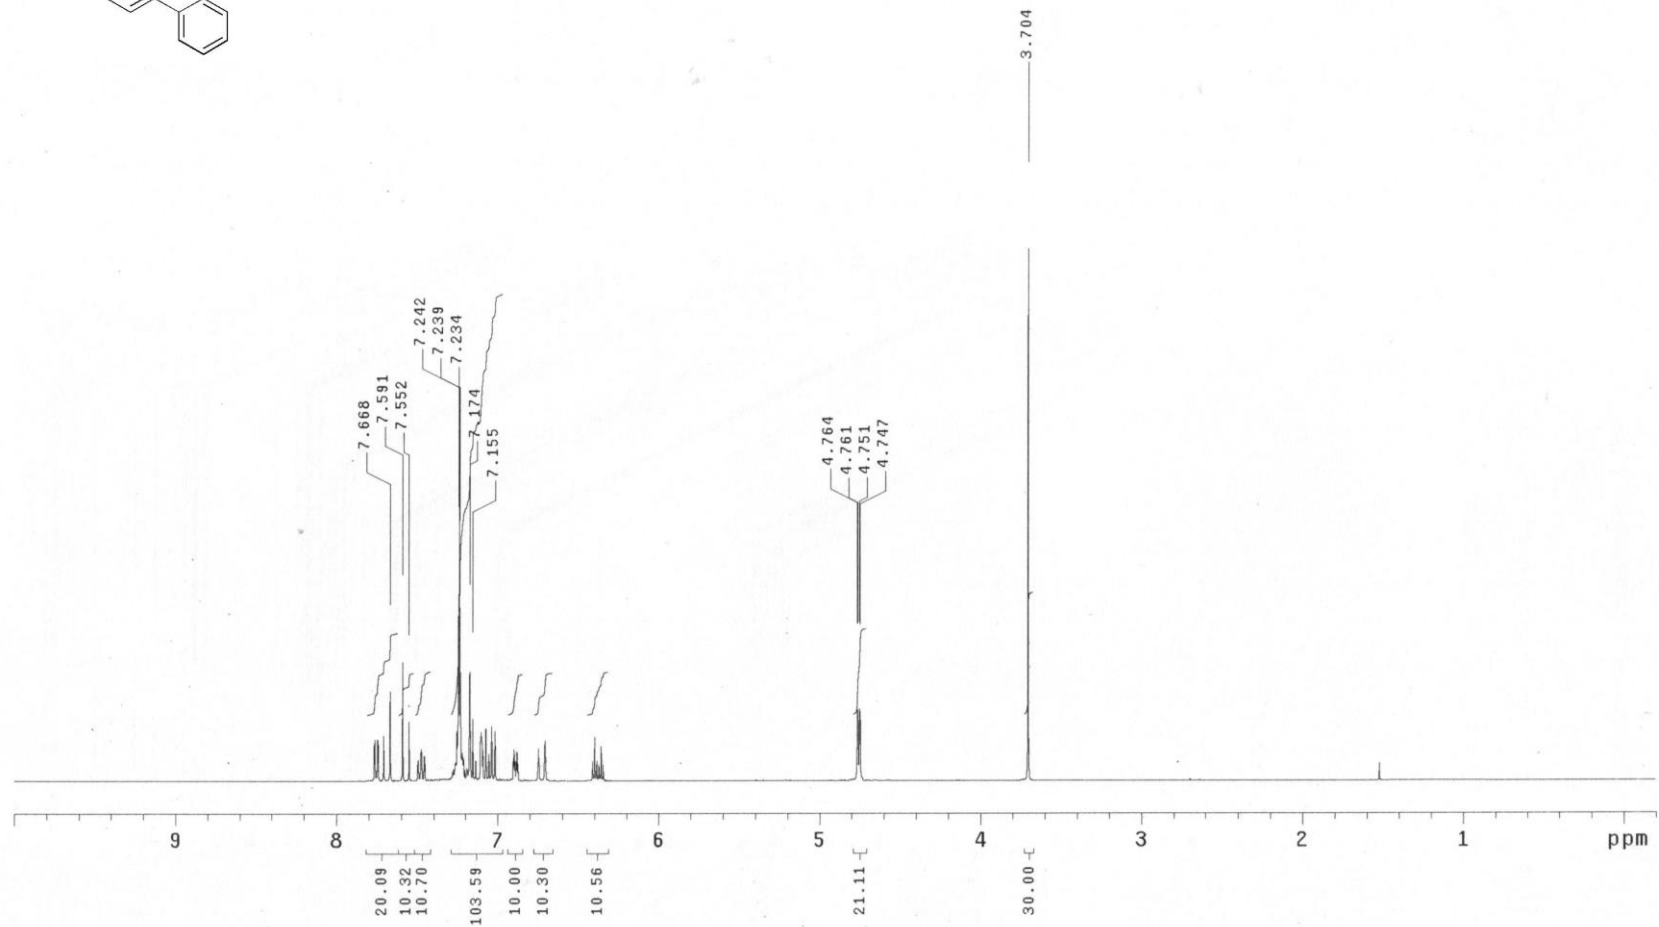

# Compound 5i (<sup>13</sup>C-NMR spectral data)

MC10Me

Pulse Sequence: s2pu1  
UNITYplus-400 "unity400"  
Date: Feb 15 2019  
Solvent: CDCl<sub>3</sub>  
Ambient temperature  
Total 128 repetitions

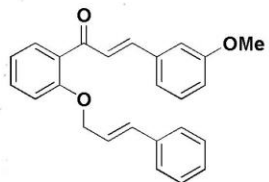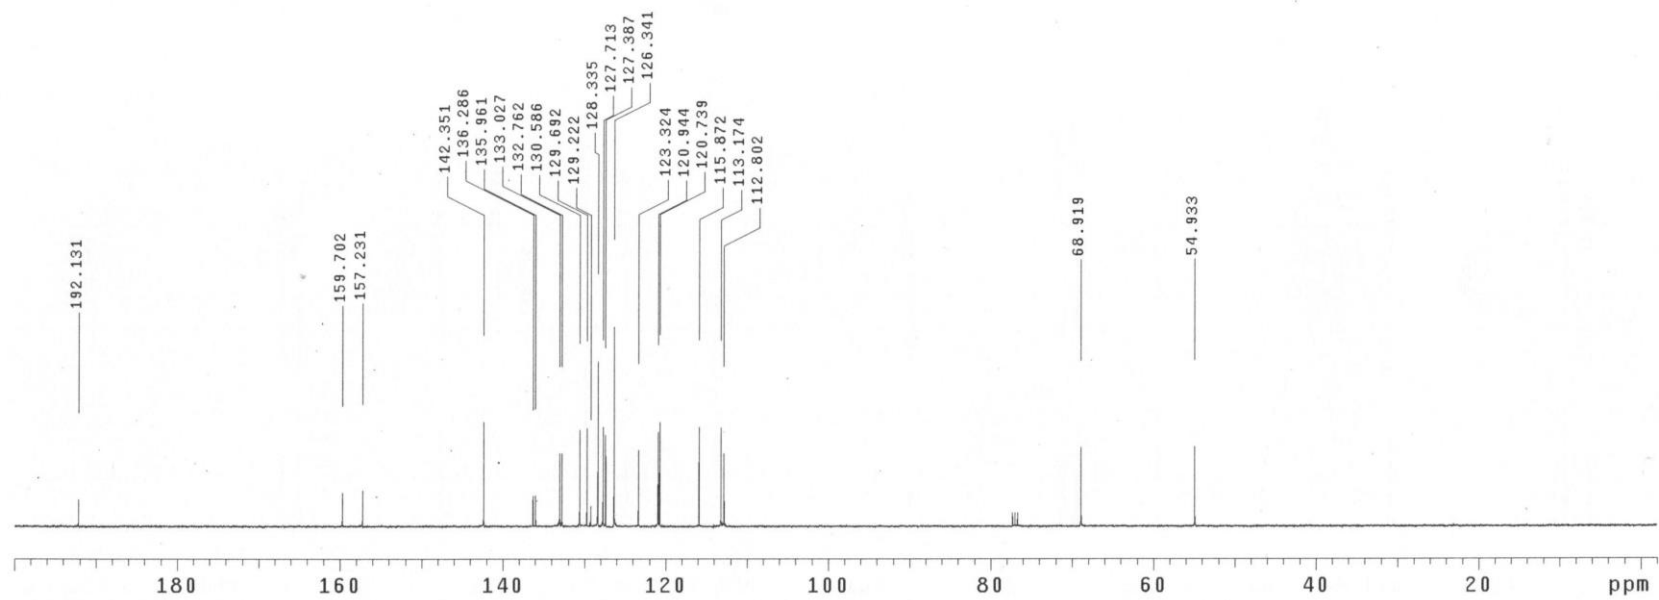

# Compound 5j (<sup>1</sup>H-NMR spectral data)

MC4-OMe

Pulse Sequence: s2pu1

UNITYplus-400 "unity400"

Date: Feb 27 2019

Solvent: CDC13

Ambient temperature

Total 32 repetitions

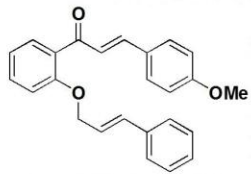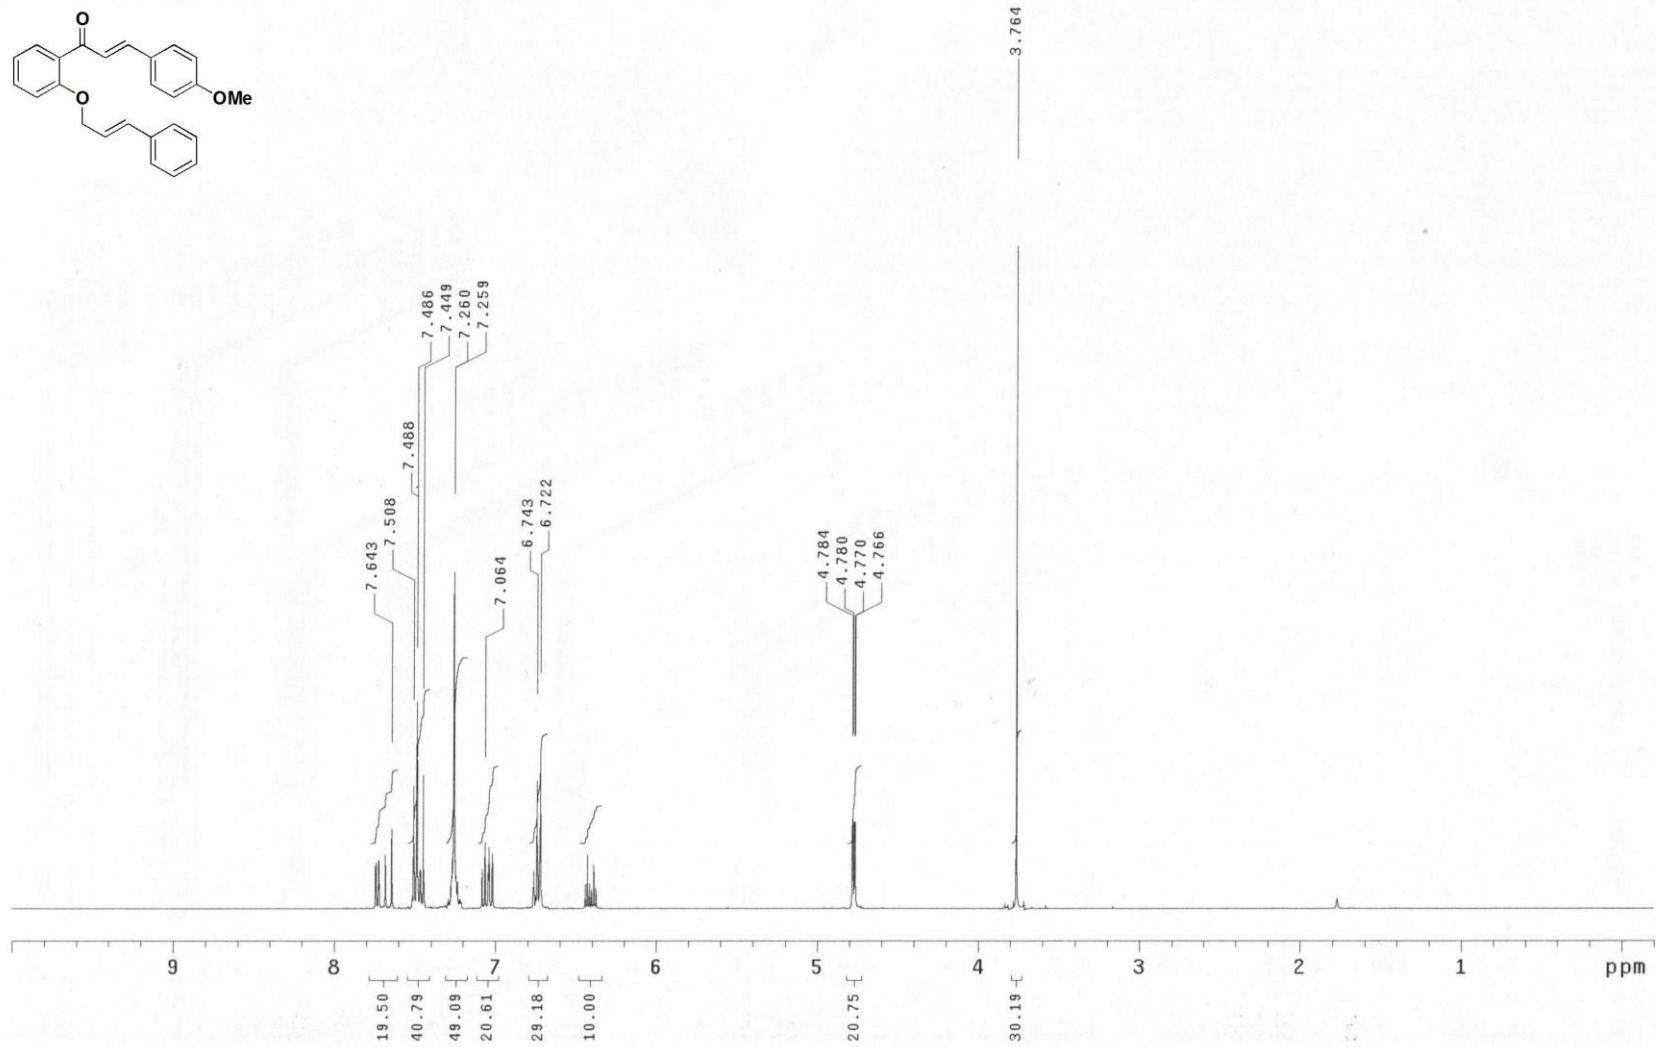

# Compound 5j (<sup>13</sup>C-NMR spectral data)

MC4-OMe

Pulse Sequence: s2pu1

UNITYplus-400 "unity400"

Date: Feb 27 2019

Solvent: CDCl<sub>3</sub>

Ambient temperature

Total 816 repetitions

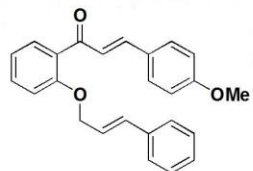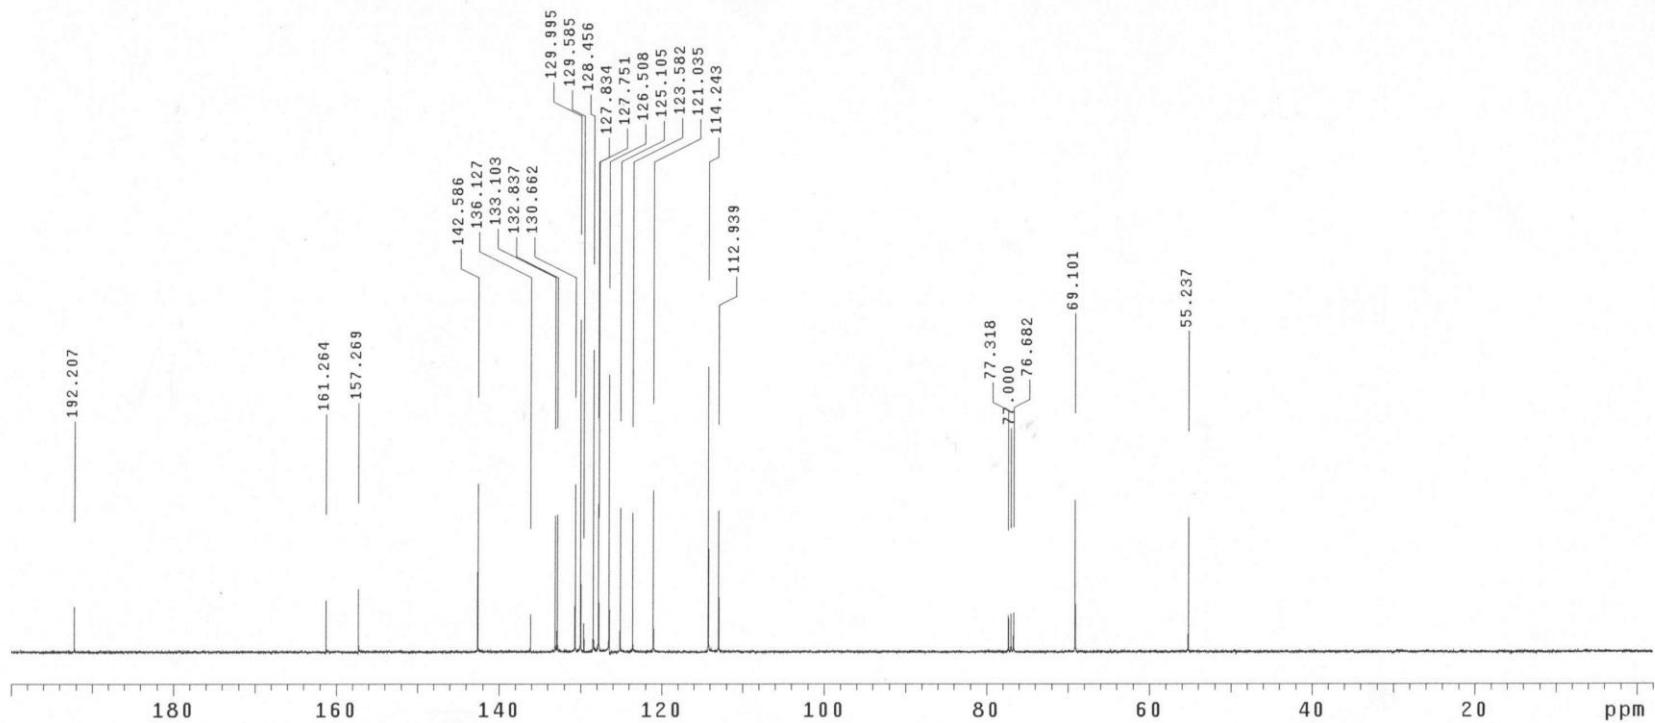

# Compound 5k (<sup>1</sup>H-NMR spectral data)

MC2,3,4-3OMe  
Pulse Sequence: s2pu1  
UNITYplus-400 "unity400"  
Date: Feb 25 2019  
Solvent: CDCl<sub>3</sub>  
Ambient temperature  
Total 32 repetitions

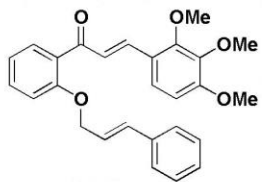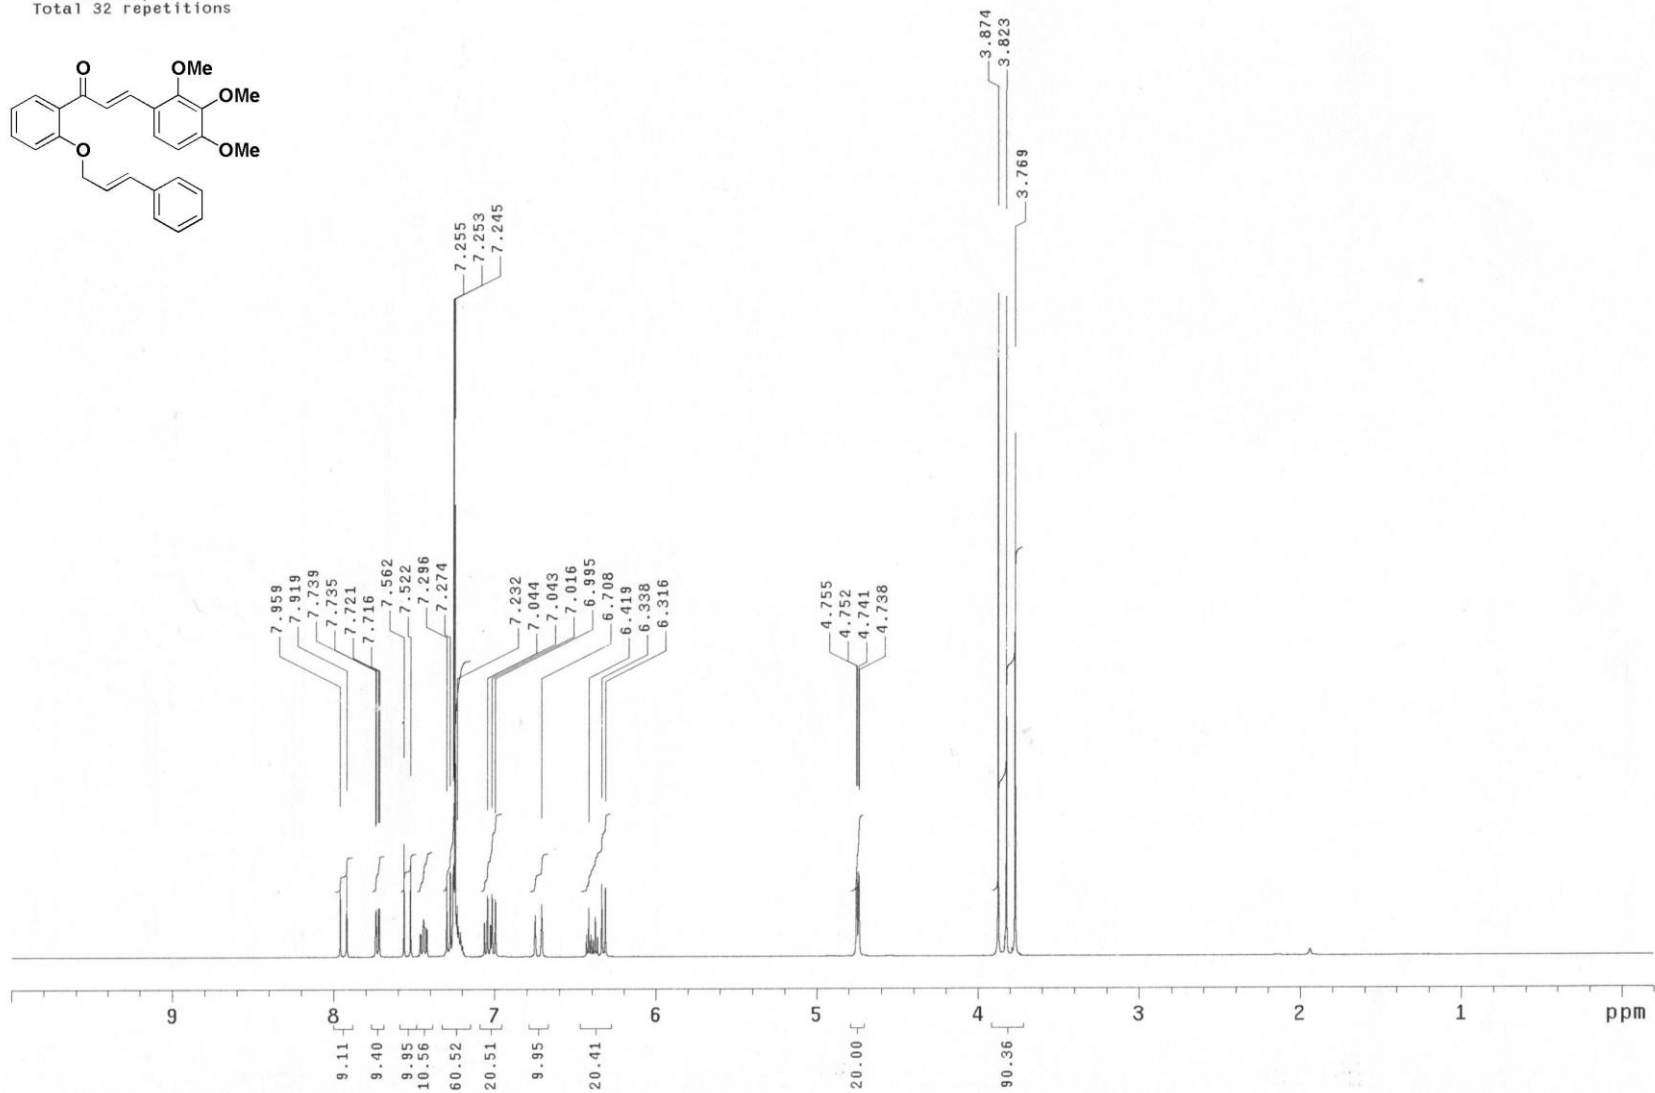



# Compound 5k (<sup>13</sup>C-NMR spectral data)

MC2,3,4-30Me

Pulse Sequence: s2pu1  
UNITYplus-400 "unity400"  
Date: Feb 25 2019  
Solvent: CDCl<sub>3</sub>  
Ambient temperature  
Total 480 repetitions

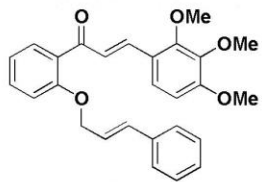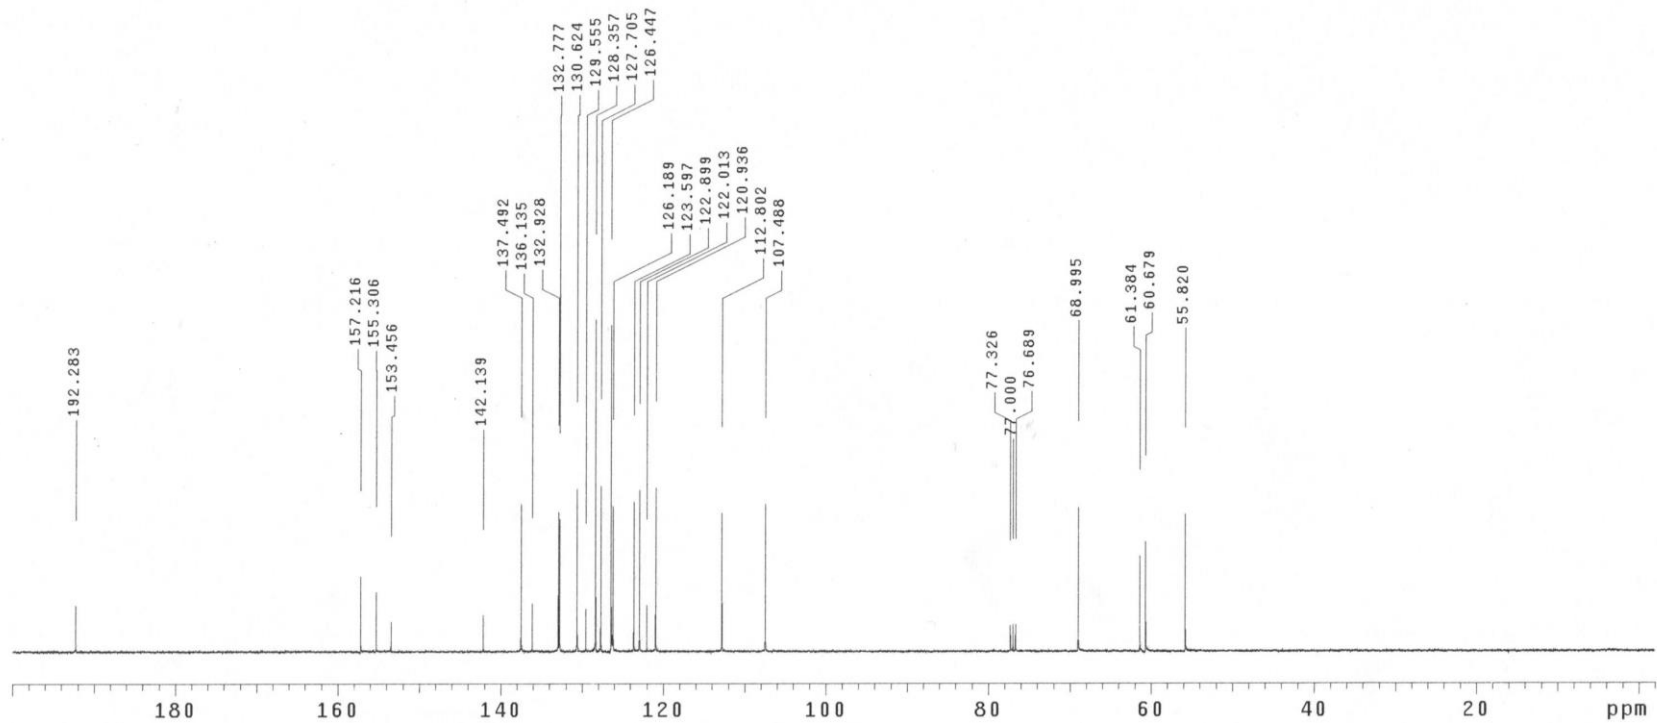

# Compound 5I (<sup>1</sup>H-NMR spectral data)

MC1080304

Pulse Sequence: s2pu1

UNITYplus-400 "unity400"

Date: Mar 4 2019

Solvent: CDCl<sub>3</sub>

Ambient temperature

Total 80 repetitions

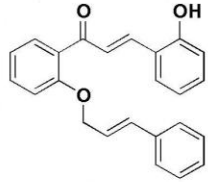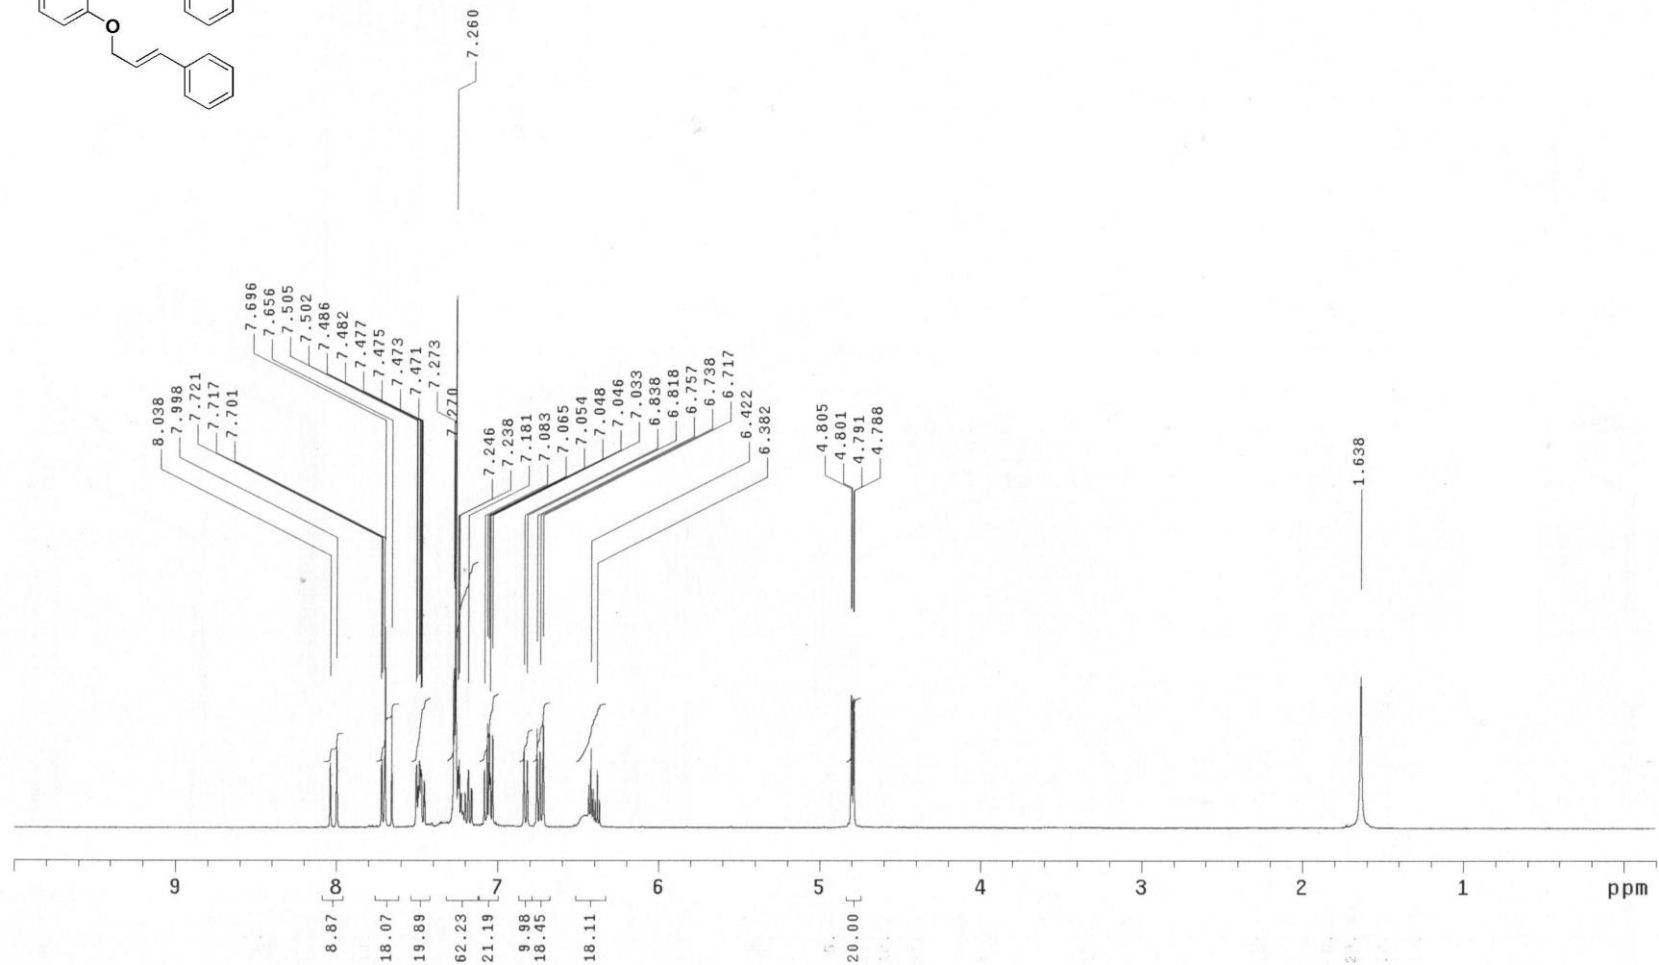

# Compound 5I (<sup>13</sup>C-NMR spectral data)

MC1080304

Pulse Sequence: s2pu1  
UNITYplus-400 "unity400"  
Date: Mar 4 2019  
Solvent: CDC13  
Ambient temperature  
Total 28592 repetitions

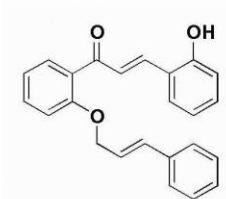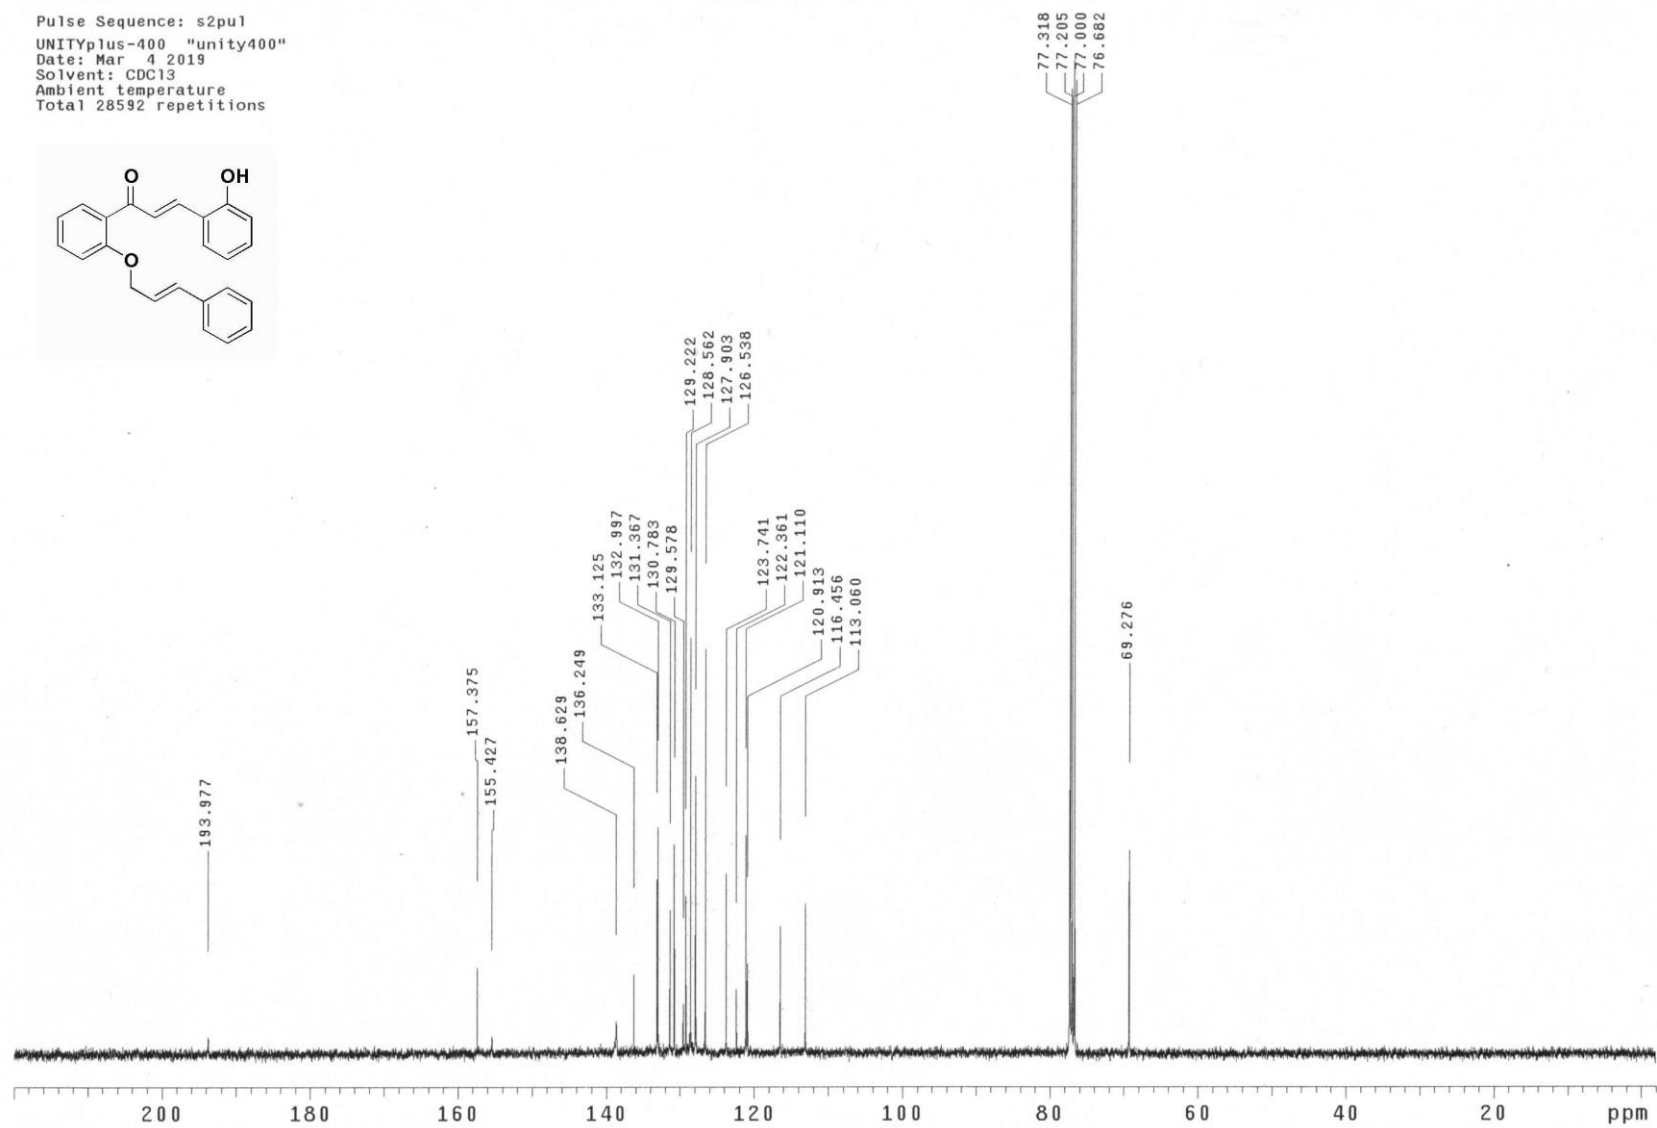



# Compound 5m (<sup>13</sup>C-NMR spectral data)

MC24Me02

Pulse Sequence: s2pu1

UNITYplus-400 "unity400"

Date: Mar 12 2019

Solvent: CDCl<sub>3</sub>

Ambient temperature

Total 224 repetitions

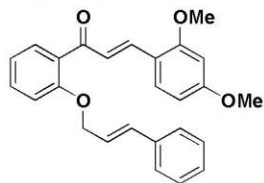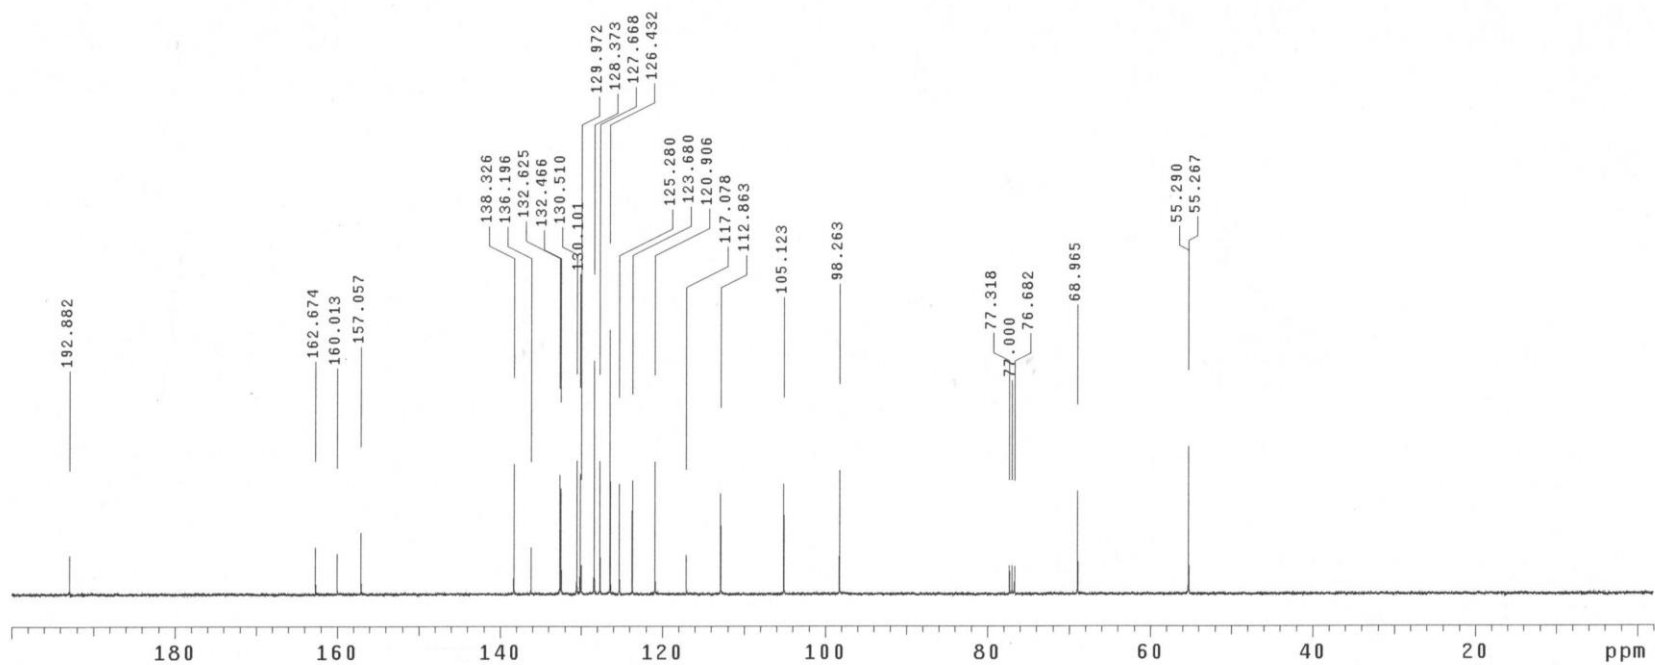

# Compound 5n (<sup>1</sup>H-NMR spectral data)

MC4N02A1do1

Pulse Sequence: s2pu1

UNITYplus-400 "unity400"

Date: May 2 2019

Solvent: CDCl<sub>3</sub>

Ambient temperature

Total 32 repetitions

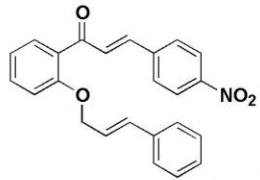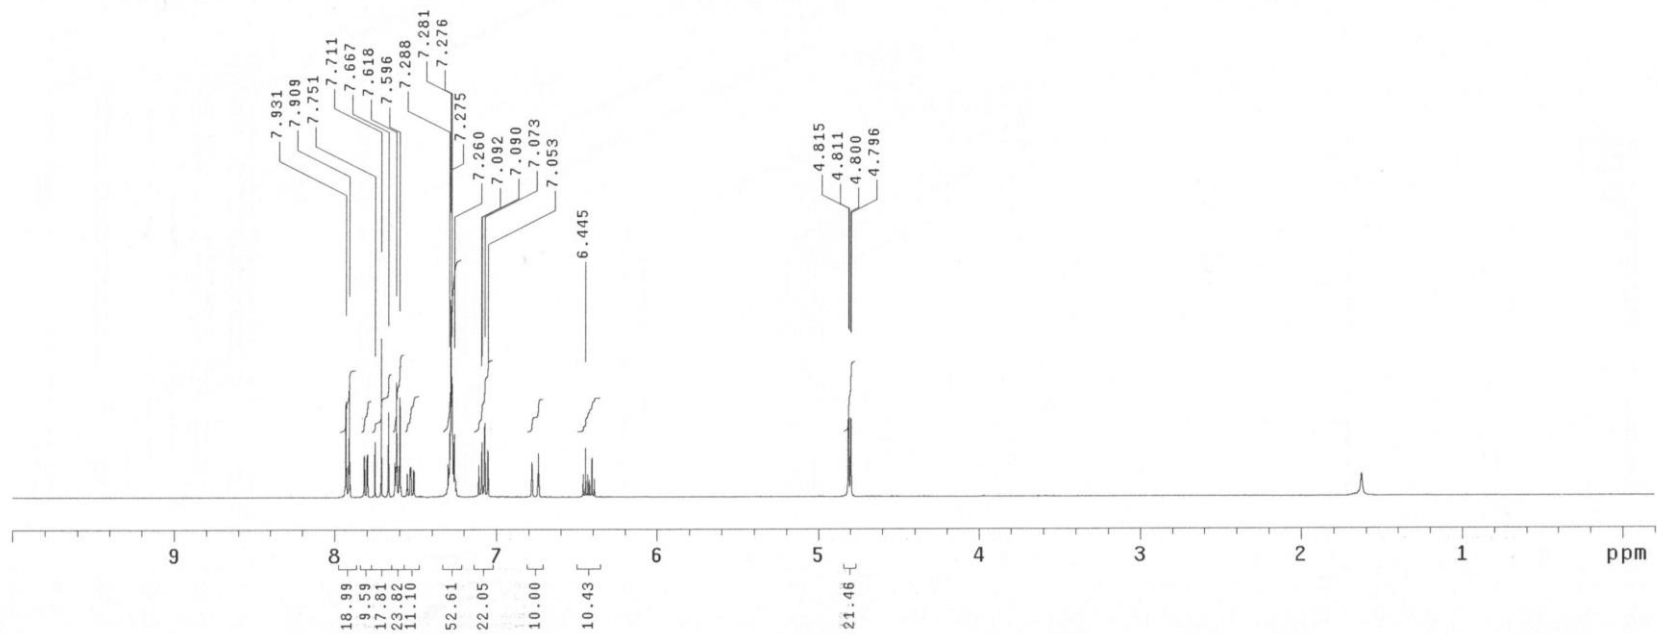

# Compound 5n (<sup>13</sup>C-NMR spectral data)

MC4N02A1do1

Pulse Sequence: s2pu1

UNITYplus-400 "unity400"

Date: May 2 2019

Solvent: CDCl<sub>3</sub>

Ambient temperature

Total 2048 repetitions

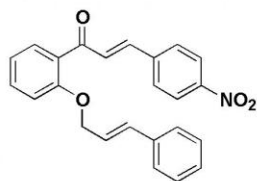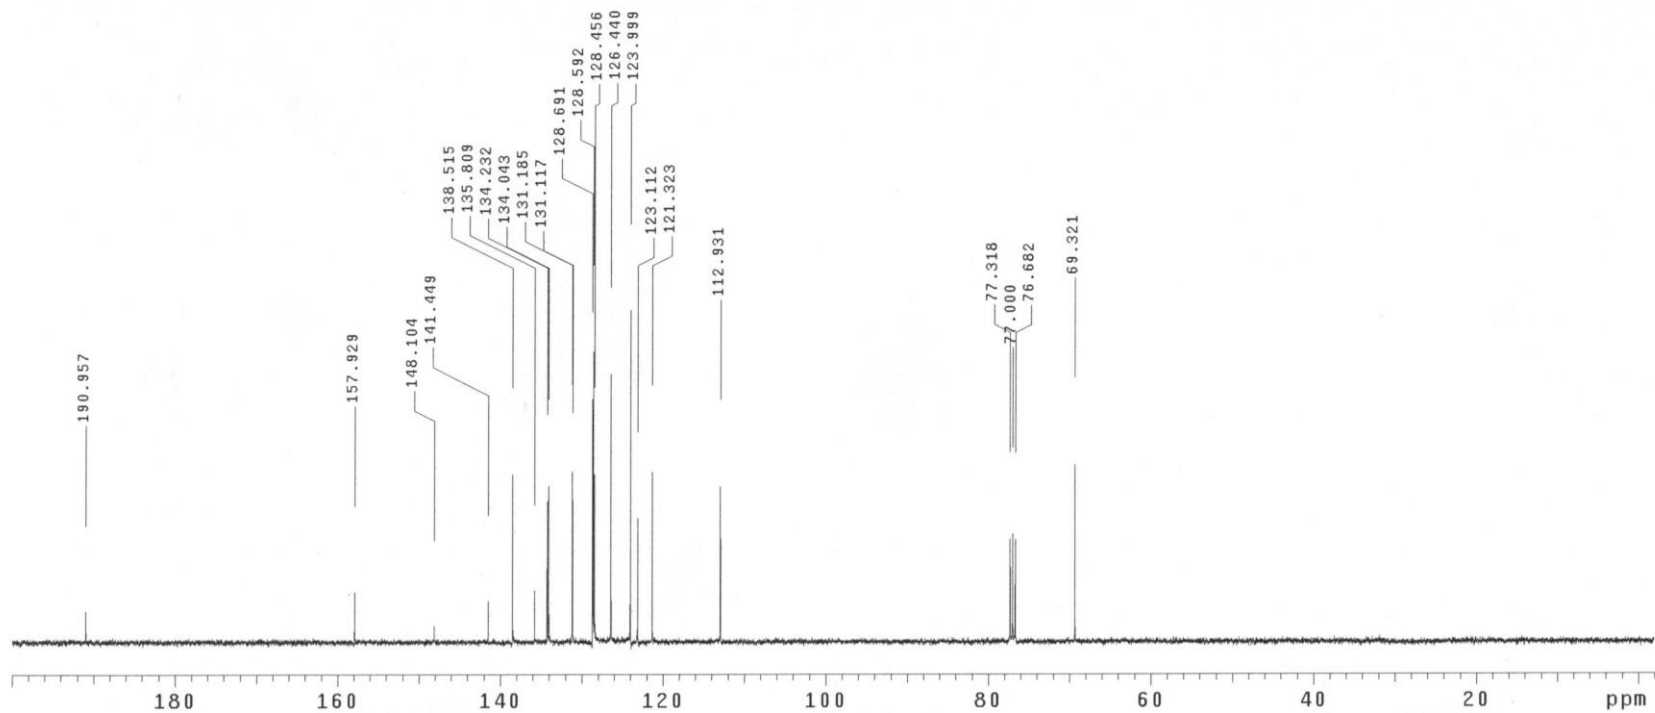

# Compound 5o (<sup>1</sup>H-NMR spectral data)

MC4PhA1do1

Pulse Sequence: s2pu1

UNITYplus-400 "unity400"

Date: Apr 8 2019

Solvent: CDCl<sub>3</sub>

Ambient temperature

Total 32 repetitions

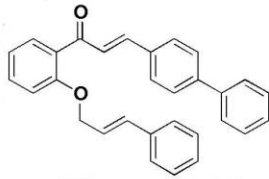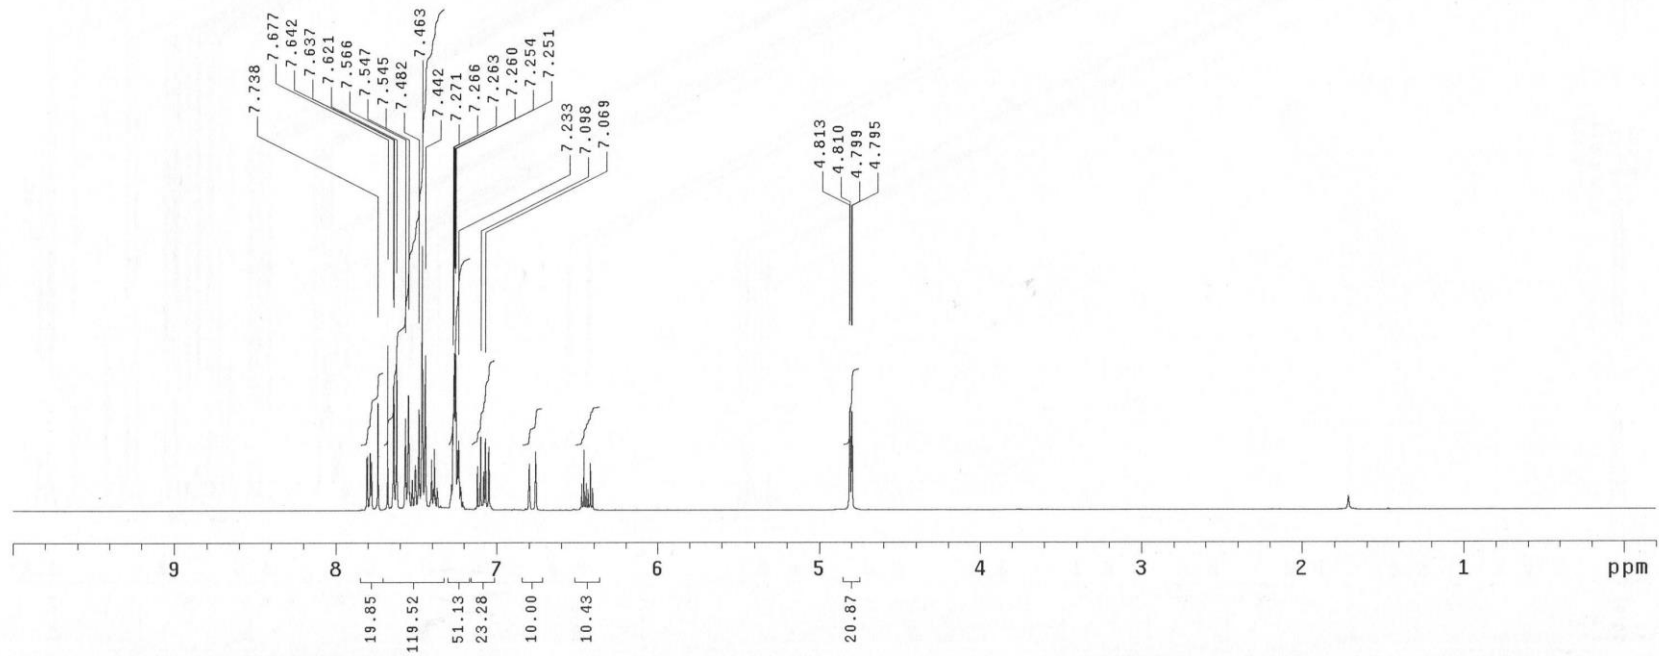



# Compound 5o (<sup>13</sup>C-NMR spectral data)

MC4PhA1do1

Pulse Sequence: s2pu1

UNITYplus-400 "unity400"

Date: Apr 8 2019

Solvent: CDCl<sub>3</sub>

Ambient temperature

Total 656 repetitions

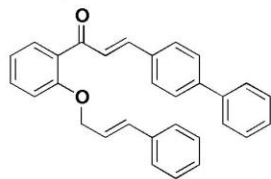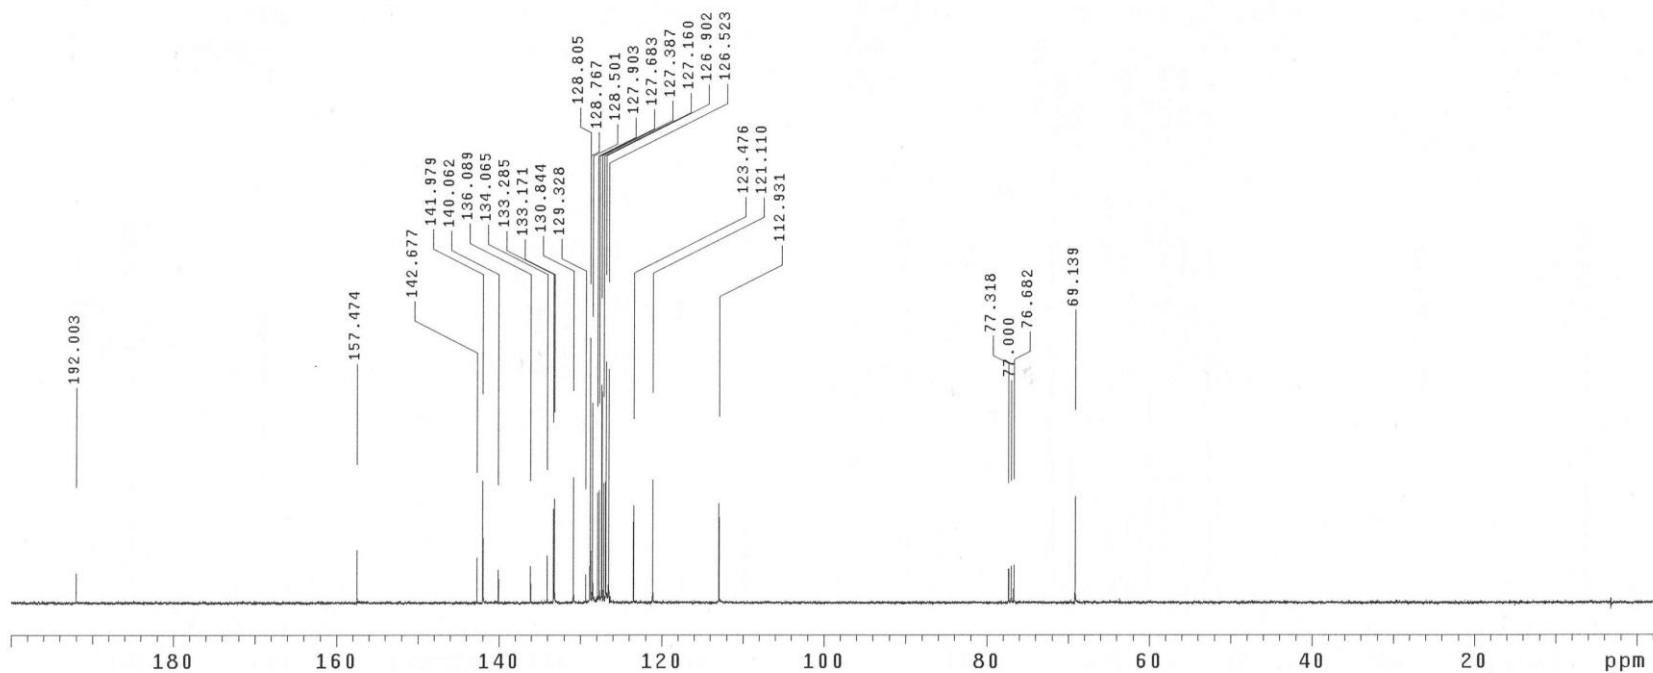

# Compound 5p (<sup>1</sup>H-NMR spectral data)

MC,3,4-2Cl-A1do1

Pulse Sequence: s2pu1

UNITYplus-400 "unity400"

Date: Apr 25 2019

Solvent: CDCl<sub>3</sub>

Ambient temperature

Total 32 repetitions

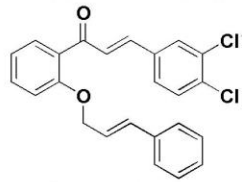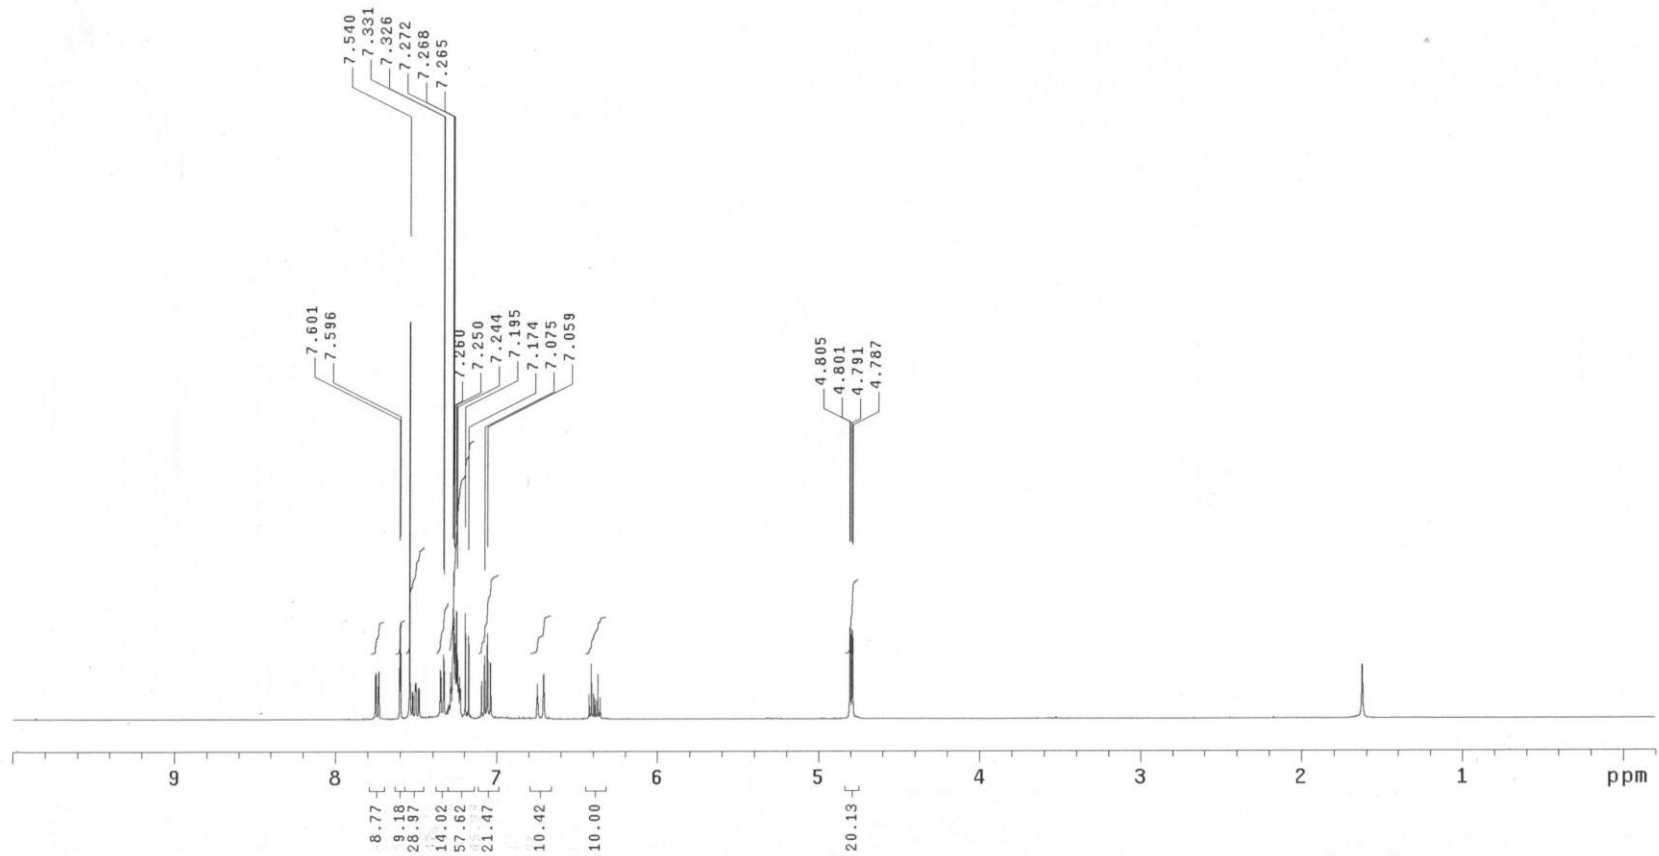

# Compound 5p (<sup>13</sup>C-NMR spectral data)

MC,3,4-2Cl-1do1

Pulse Sequence: s2pu1  
UNITYplus-400 "unity400"  
Date: Apr 25 2019  
Solvent: CDCl<sub>3</sub>  
Ambient temperature  
Total 1024 repetitions

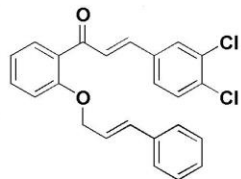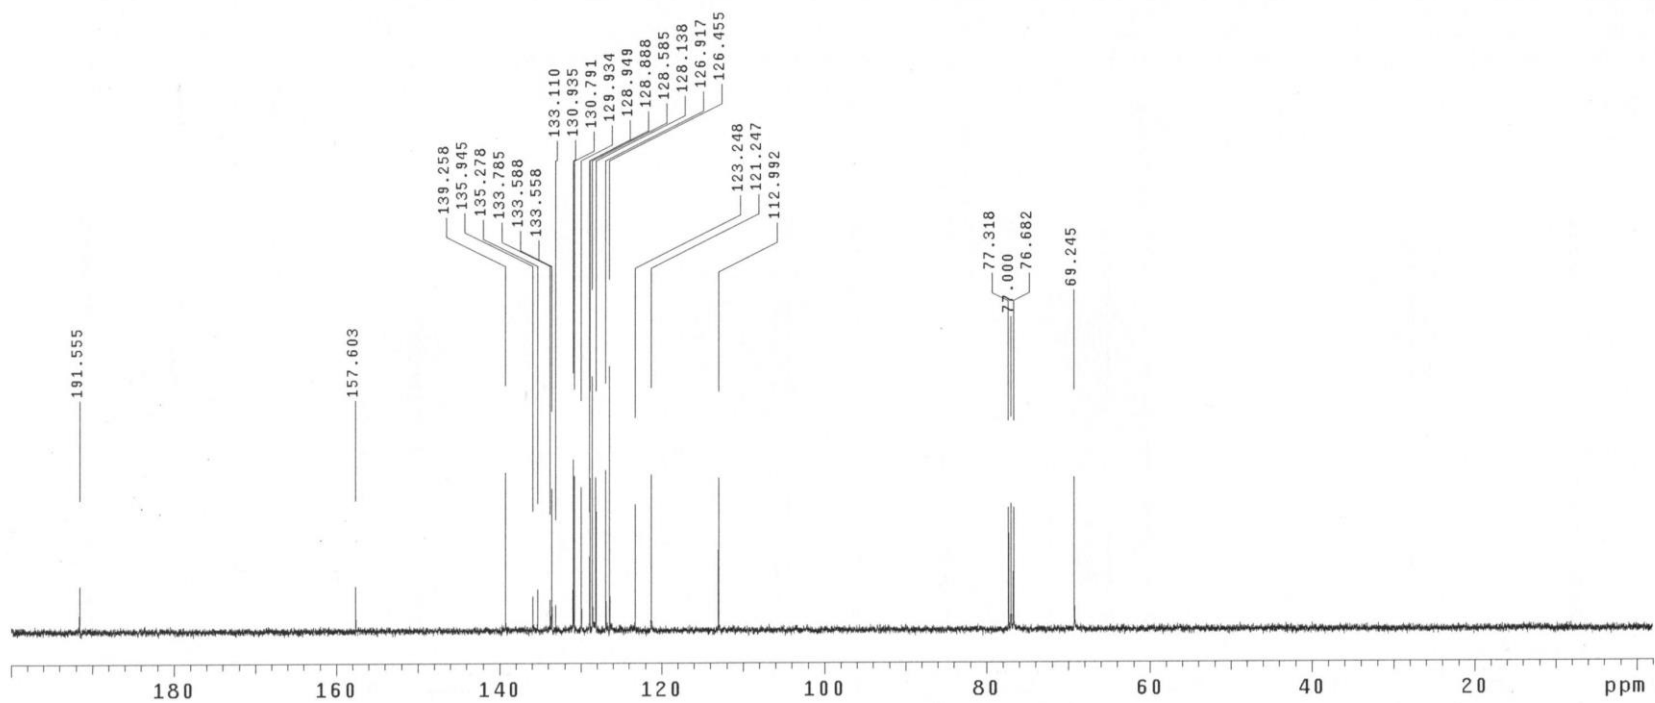

# Compound 5q (<sup>1</sup>H-NMR spectral data)

MCNA1do1

Pulse Sequence: s2pu1

UNITYplus-400 "unity400"

Date: Apr 23 2019

Solvent: CDCl<sub>3</sub>

Ambient temperature

Total 32 repetitions

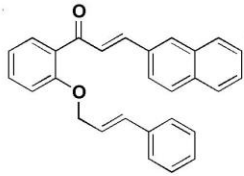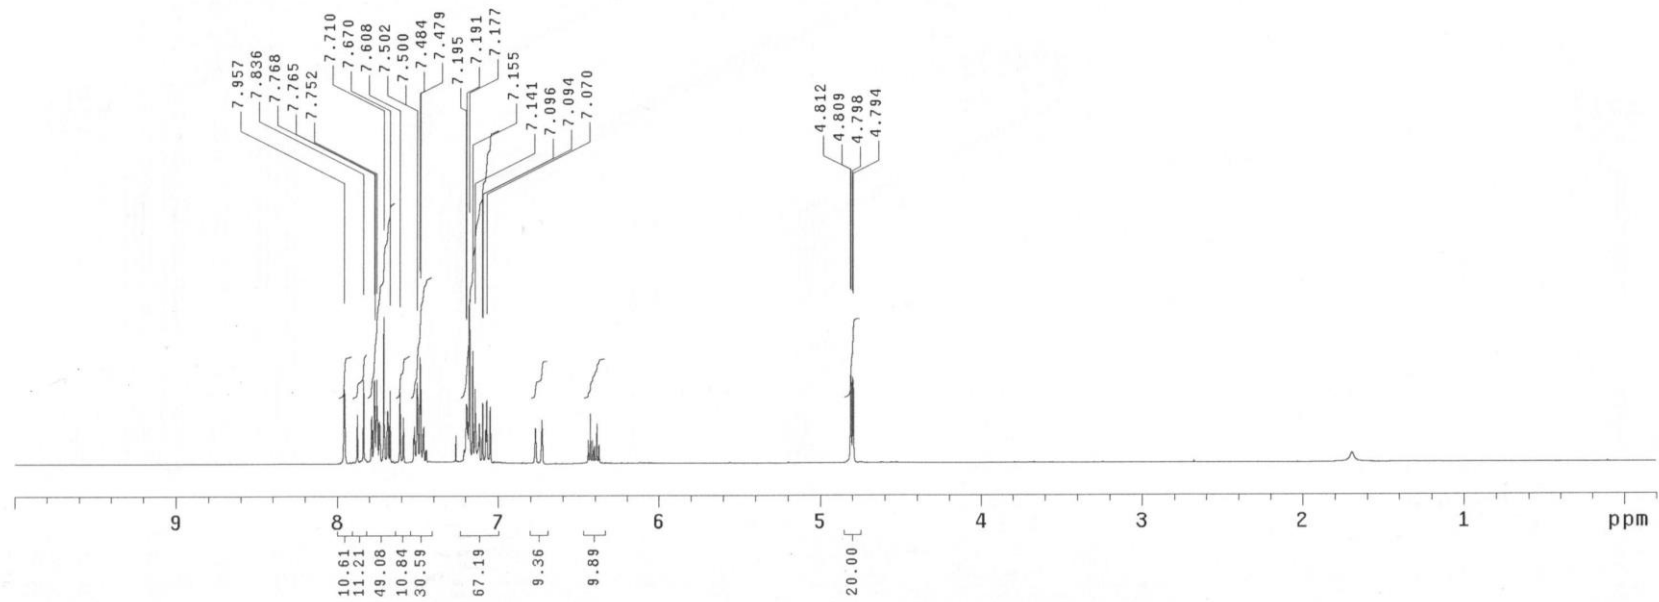



# Compound 5r (<sup>1</sup>H-NMR spectral data)

MC20 A1do1

Pulse Sequence: s2pu1  
UNITYplus-400 "unity400"  
Date: Apr 18 2019  
Solvent: CDCl<sub>3</sub>  
Ambient temperature  
Total 32 repetitions

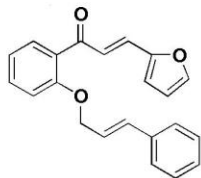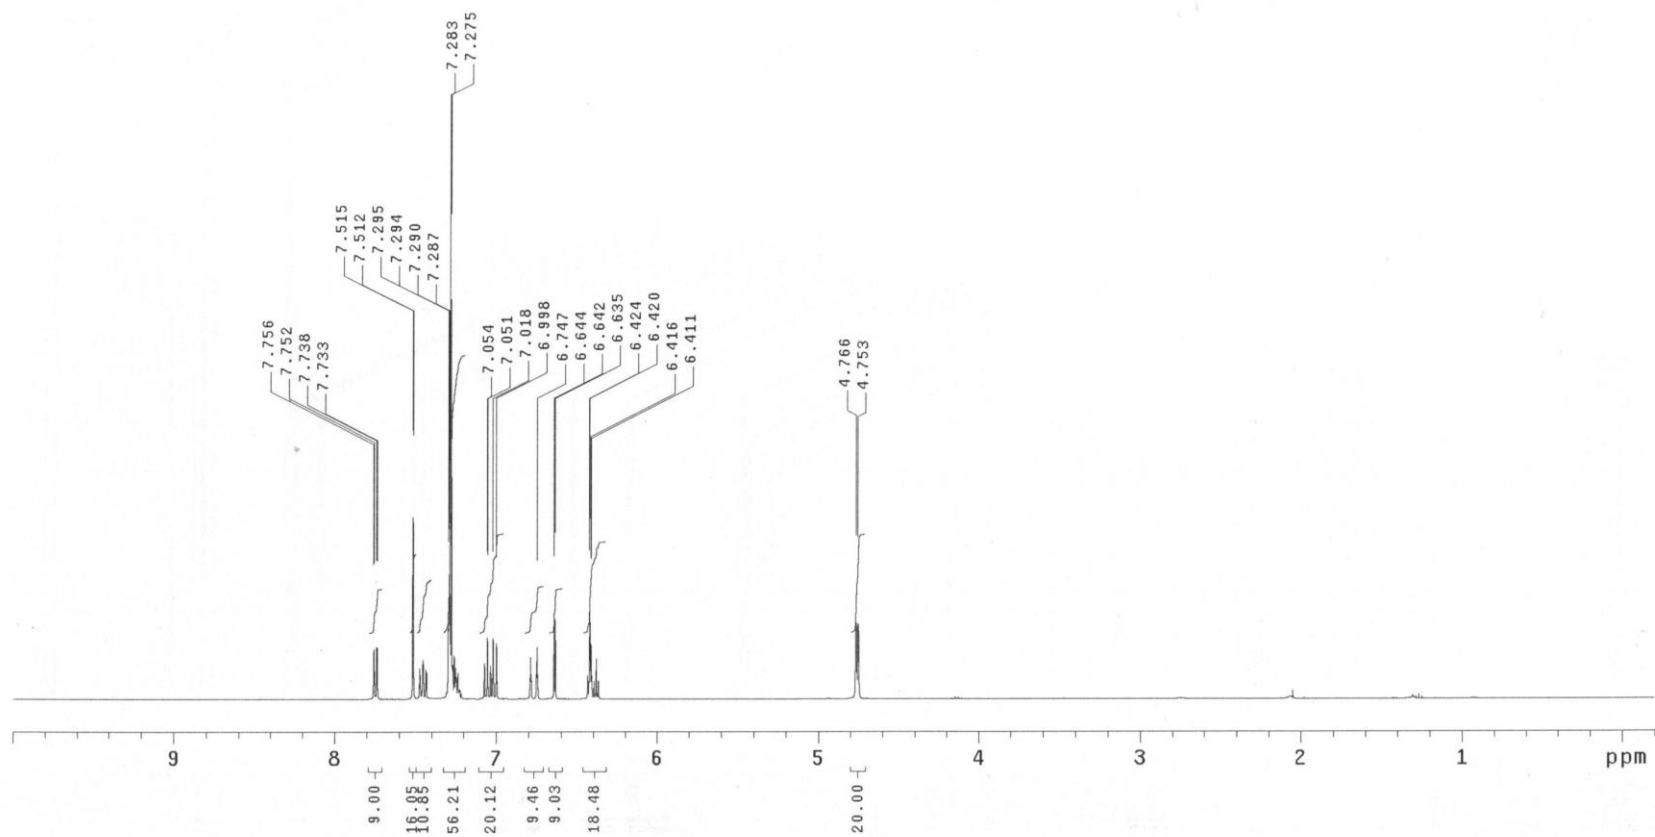

# Compound 5r (<sup>13</sup>C-NMR spectral data)

MC20 A1do1

Pulse Sequence: s2pu1

UNITYplus-400 "unity400"

Date: Apr 18 2019

Solvent: CDCl<sub>3</sub>

Ambient temperature

Total 752 repetitions

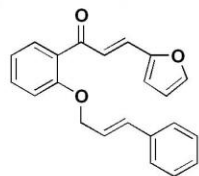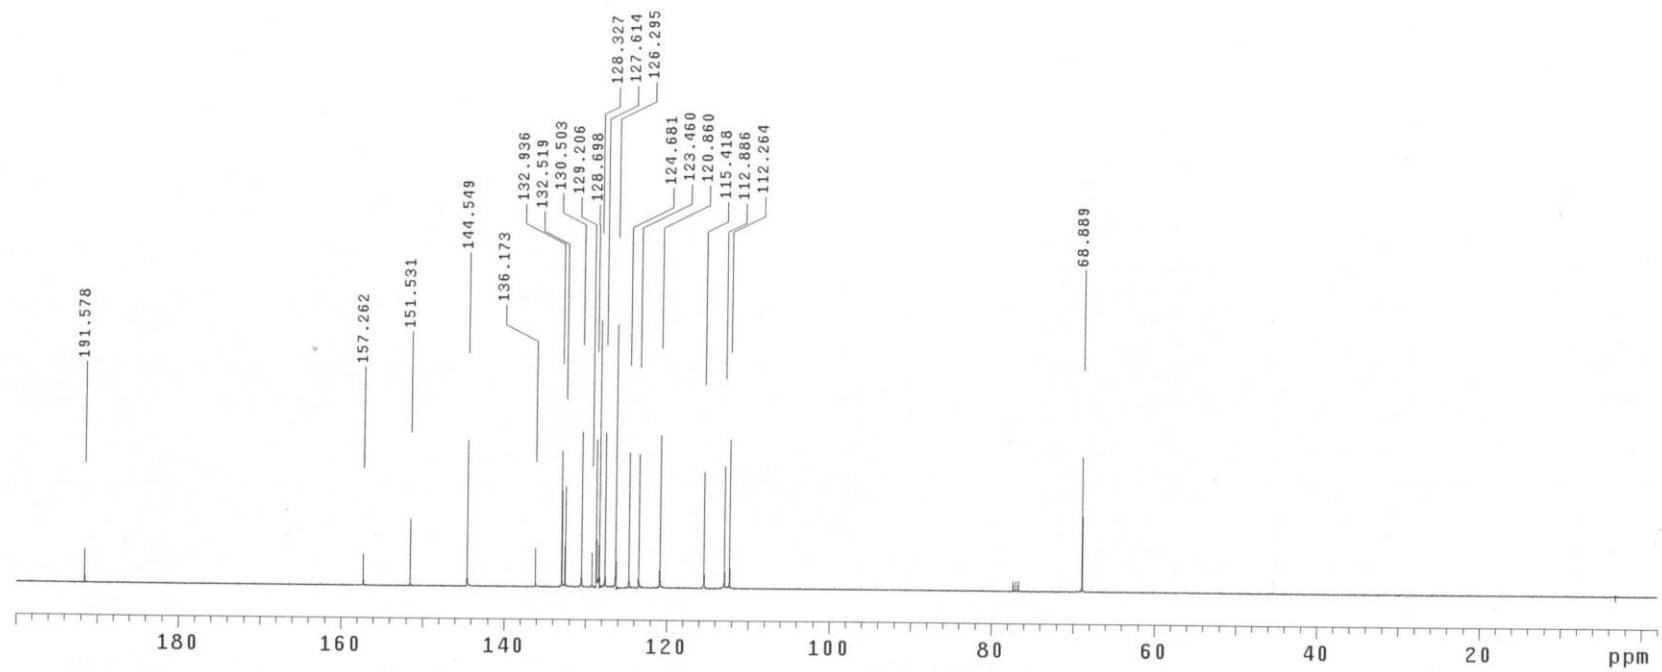

# Compound 5s (<sup>1</sup>H-NMR spectral data)

MC2Sa1do1

Pulse Sequence: s2pu1  
UNITYplus-400 "unity400"  
Date: Apr 29 2019  
Solvent: CDCl<sub>3</sub>  
Ambient temperature  
Total 32 repetitions

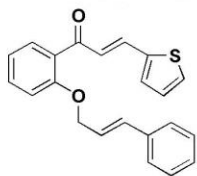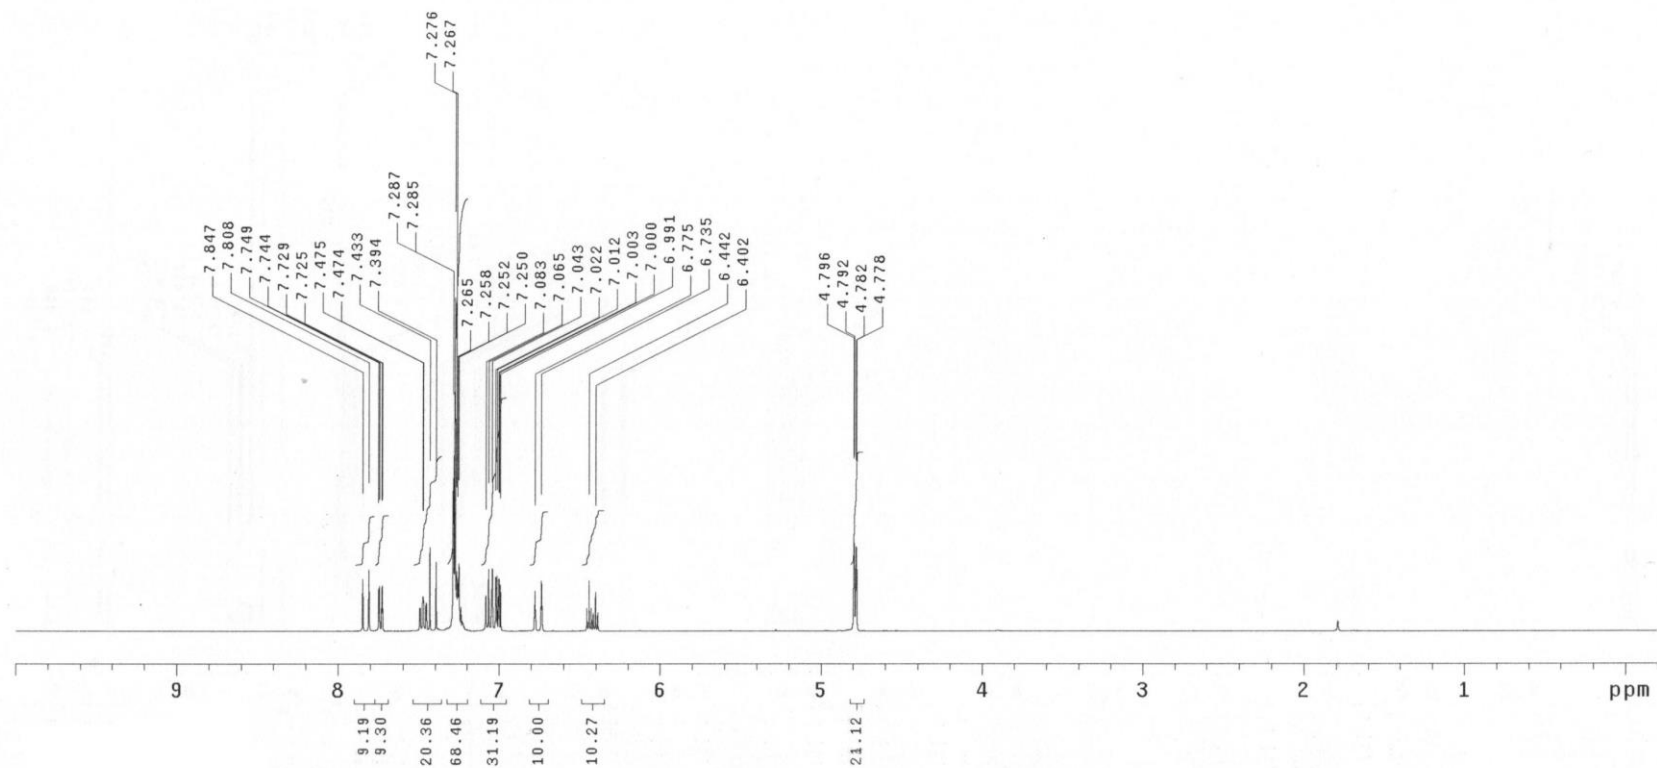



# Compound 5s (<sup>13</sup>C-NMR spectral data)

MC2Sa1do1

Pulse Sequence: s2pu1  
UNITYplus-400 "unity400"  
Date: Apr 29 2019  
Solvent: CDCl3  
Ambient temperature  
Total 256 repetitions

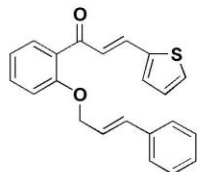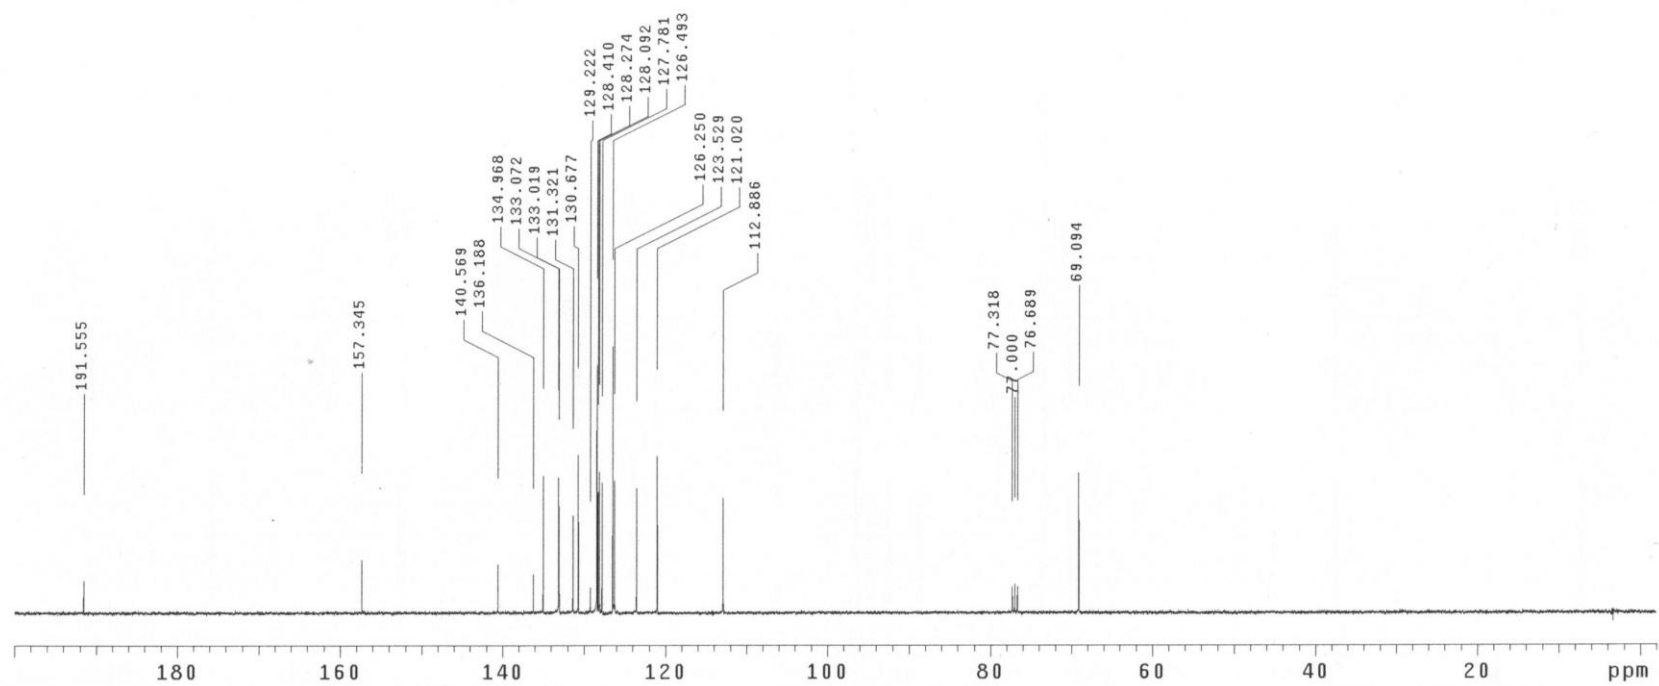

# Compound 5t (<sup>1</sup>H-NMR spectral data)

MC2-FA1do1

Pulse Sequence: s2pu1

UNITYplus-400 "unity400"

Date: Mar 28 2019

Solvent: CDCl<sub>3</sub>

Ambient temperature

Total 32 repetitions

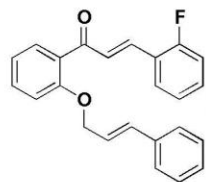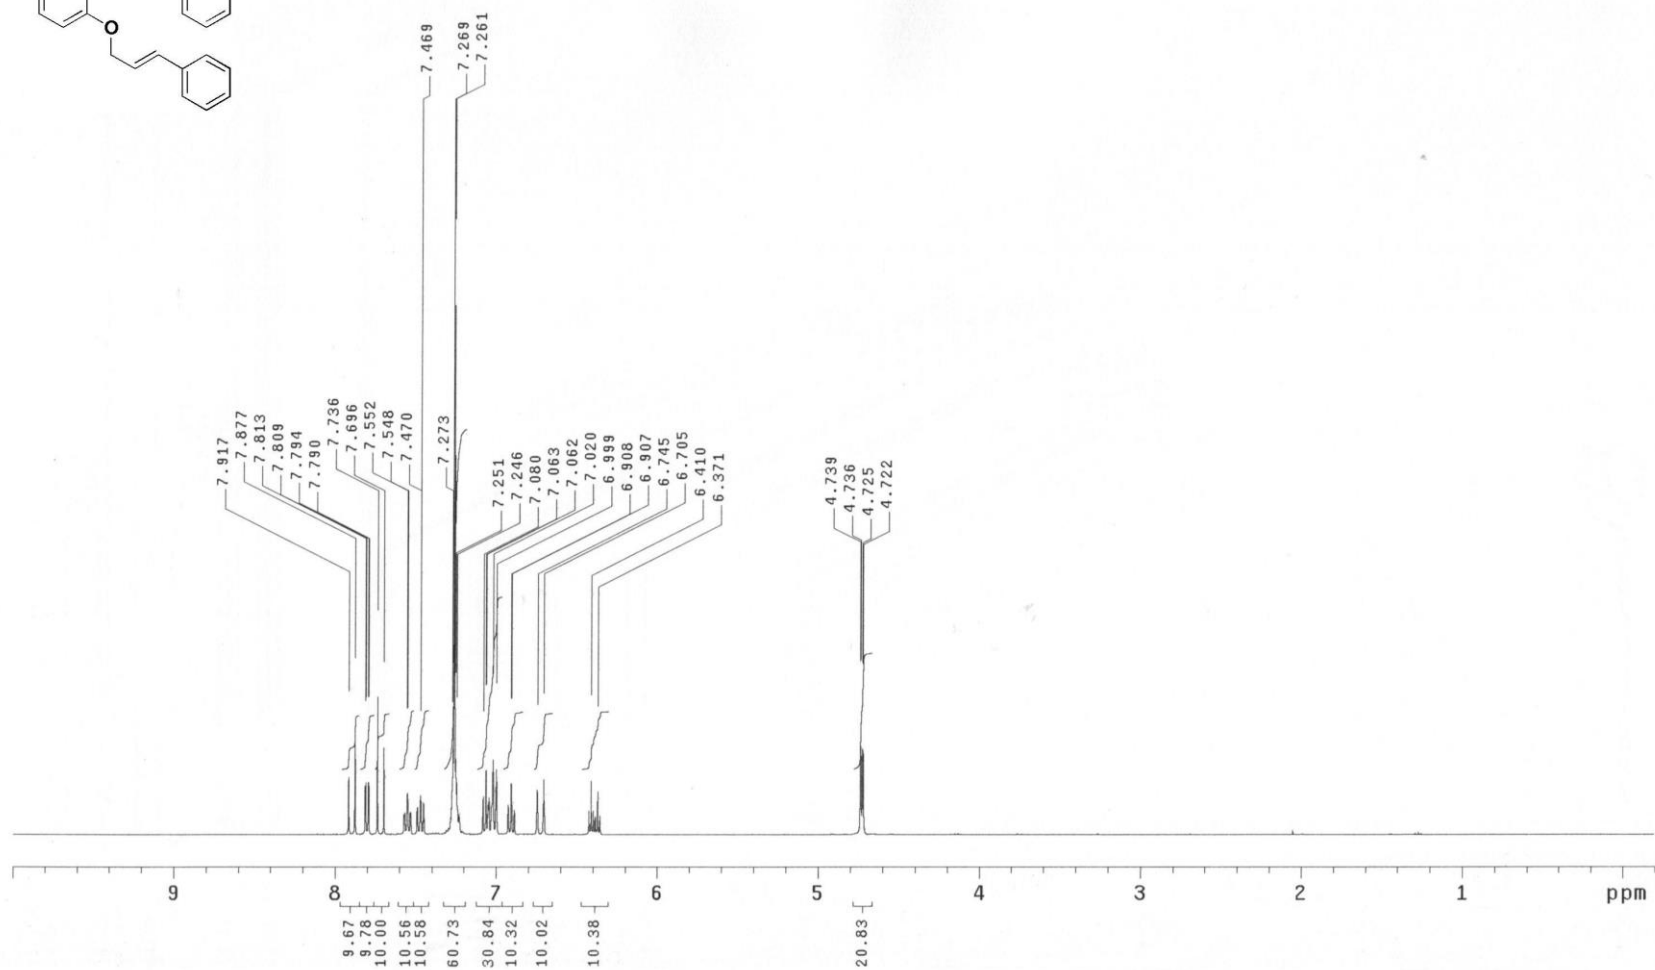

# Compound 5t (<sup>13</sup>C-NMR spectral data)

MC2-FA1do1

Pulse Sequence: s2pu1

UNITYplus-400 "unity400"

Date: Mar 28 2019

Solvent: CDCl<sub>3</sub>

Ambient temperature

Total 352 repetitions

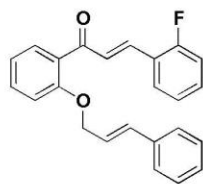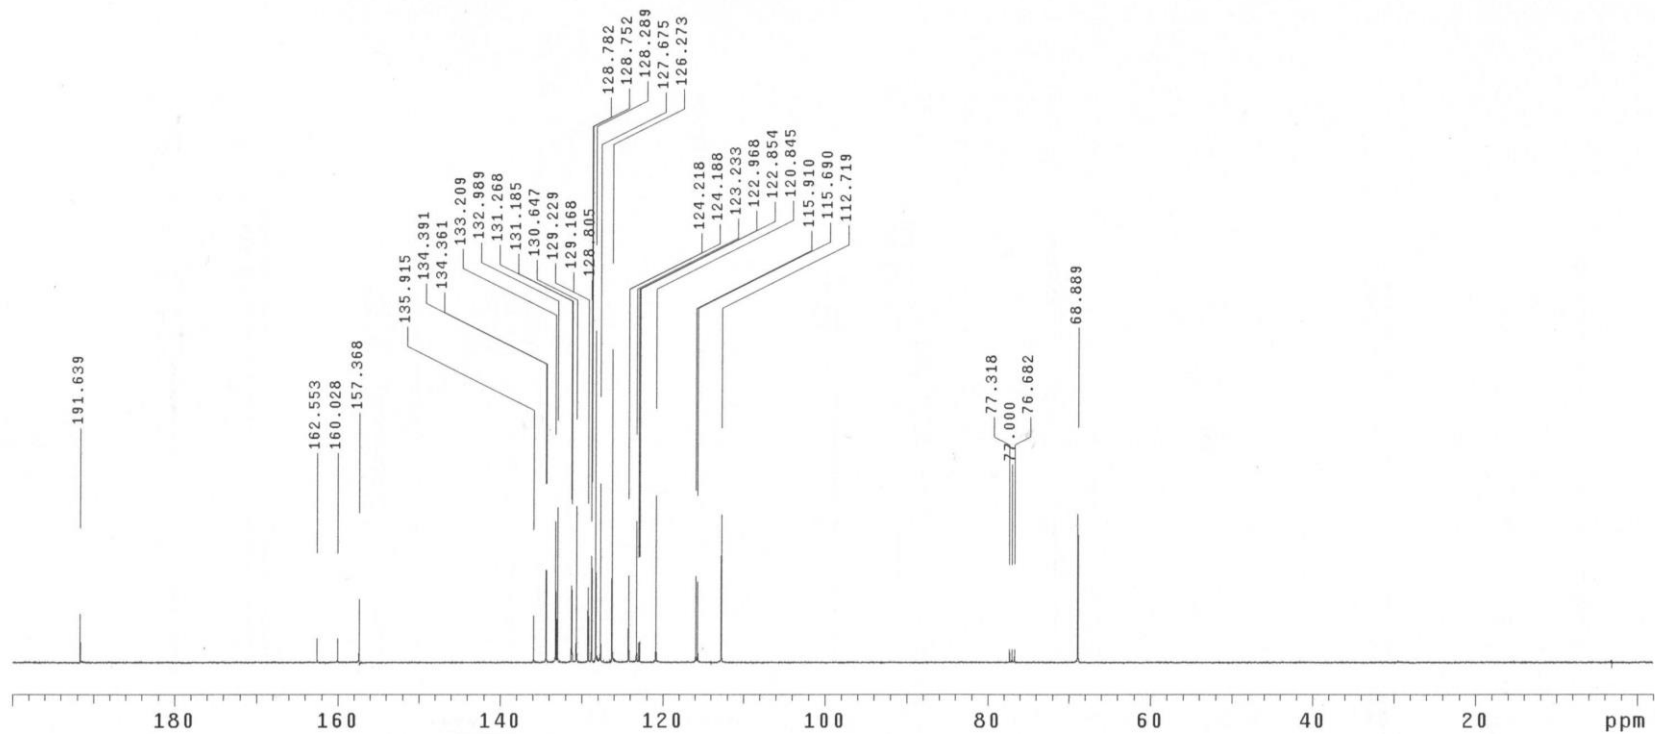

# Compound 5u (<sup>1</sup>H-NMR spectral data)

MC3NA1do1

Pulse Sequence: s2pu1

UNITYplus-400 "unity400"

Date: Apr 23 2019

Solvent: CDCl<sub>3</sub>

Ambient temperature

Total 32 repetitions

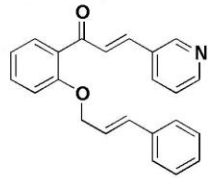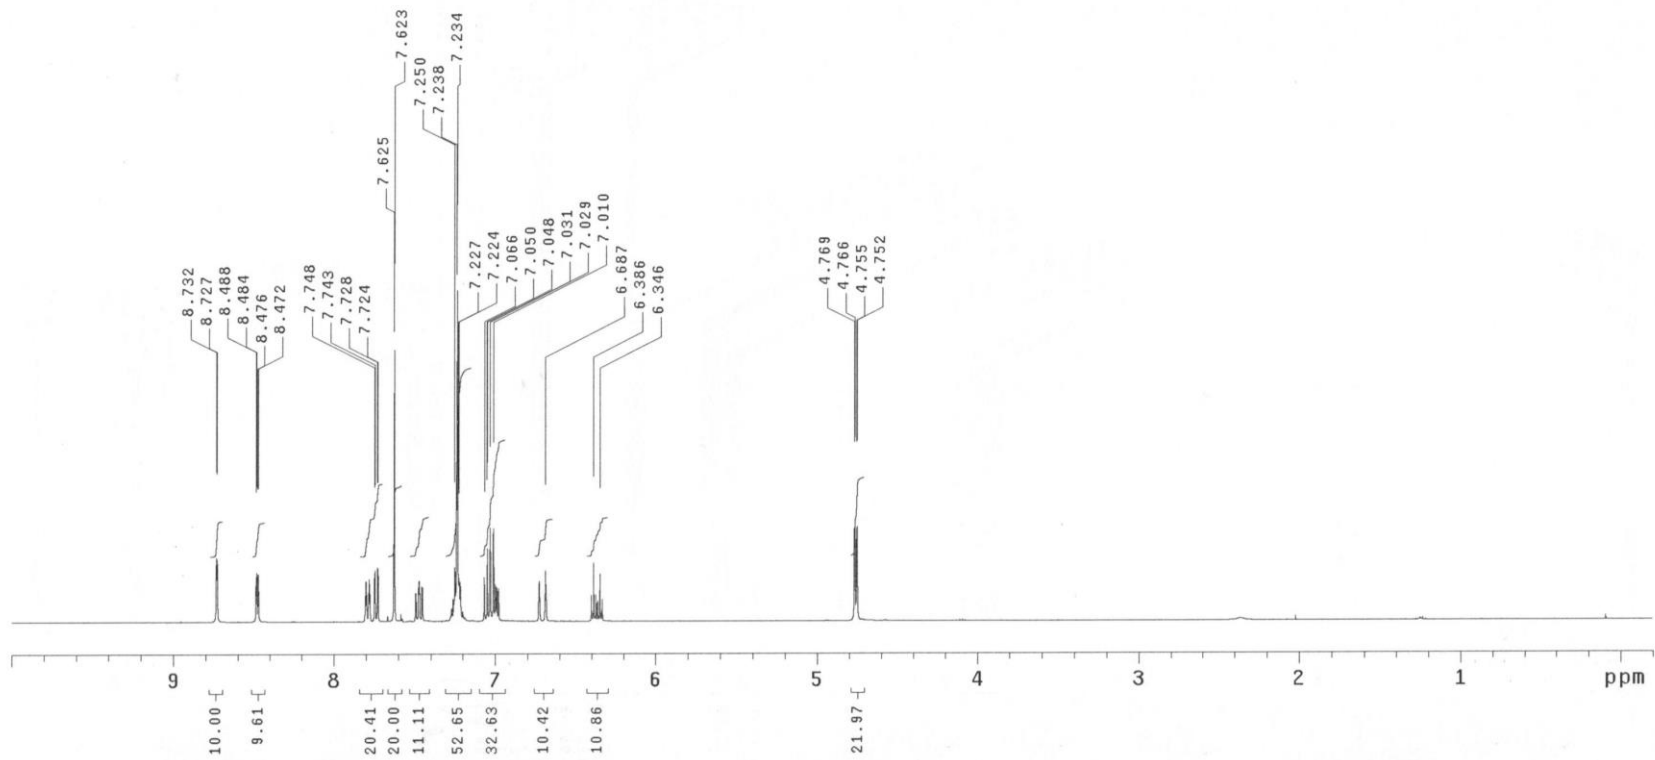

# Compound 5u (<sup>13</sup>C-NMR spectral data)

MC3NA1do1

Pulse Sequence: s2pu1  
UNITYplus-400 "unity400"  
Date: Apr 23 2019  
Solvent: CDCl<sub>3</sub>  
Ambient temperature  
Total 240 repetitions

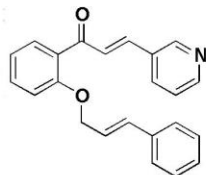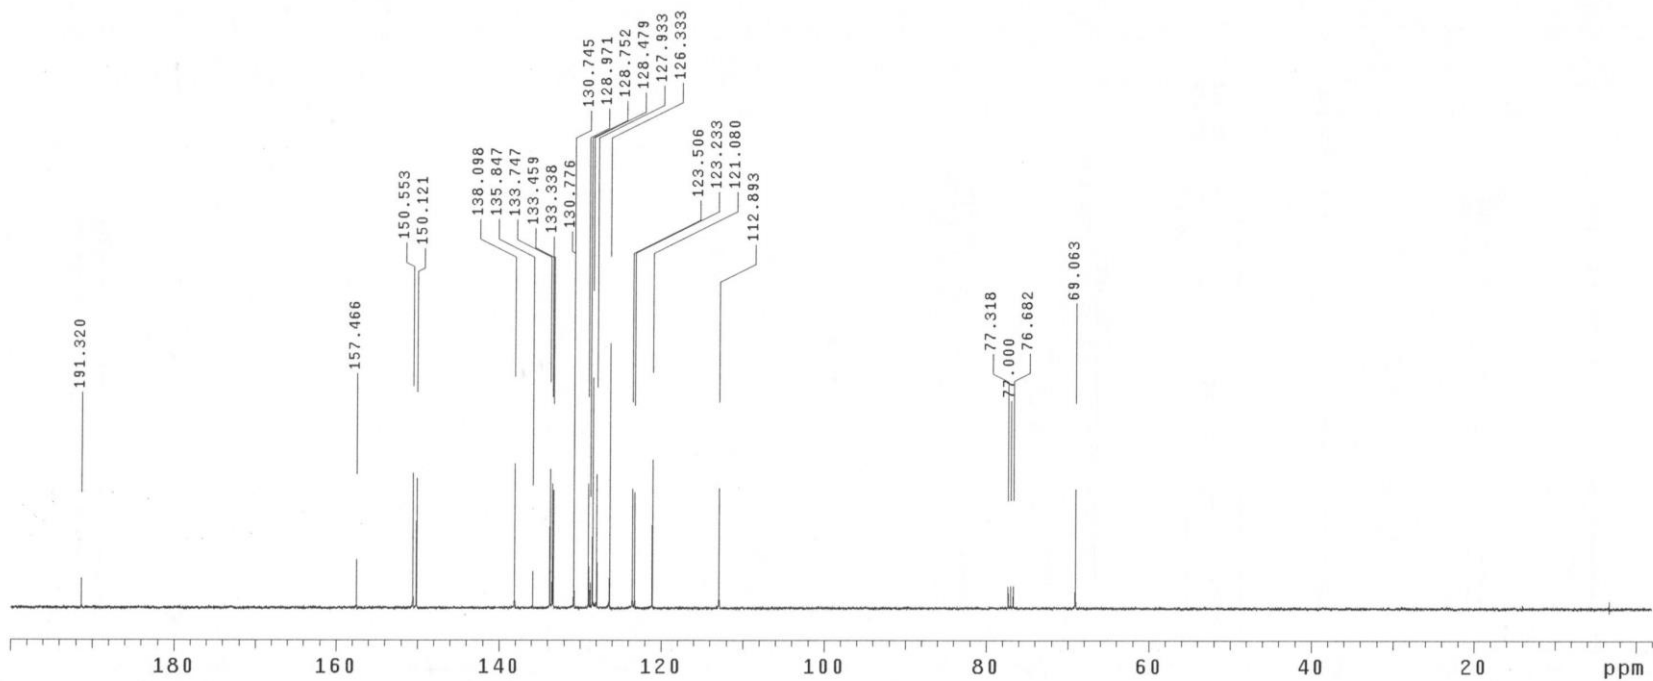

# Compound 5v (<sup>1</sup>H-NMR spectral data)

MC3,4-20Me Aldo1

Pulse Sequence: s2pu1

UNITYplus-400 "unity400"

Date: Apr 18 2019

Solvent: CDCl<sub>3</sub>

Ambient temperature

Total 32 repetitions

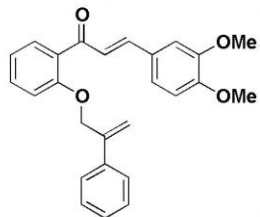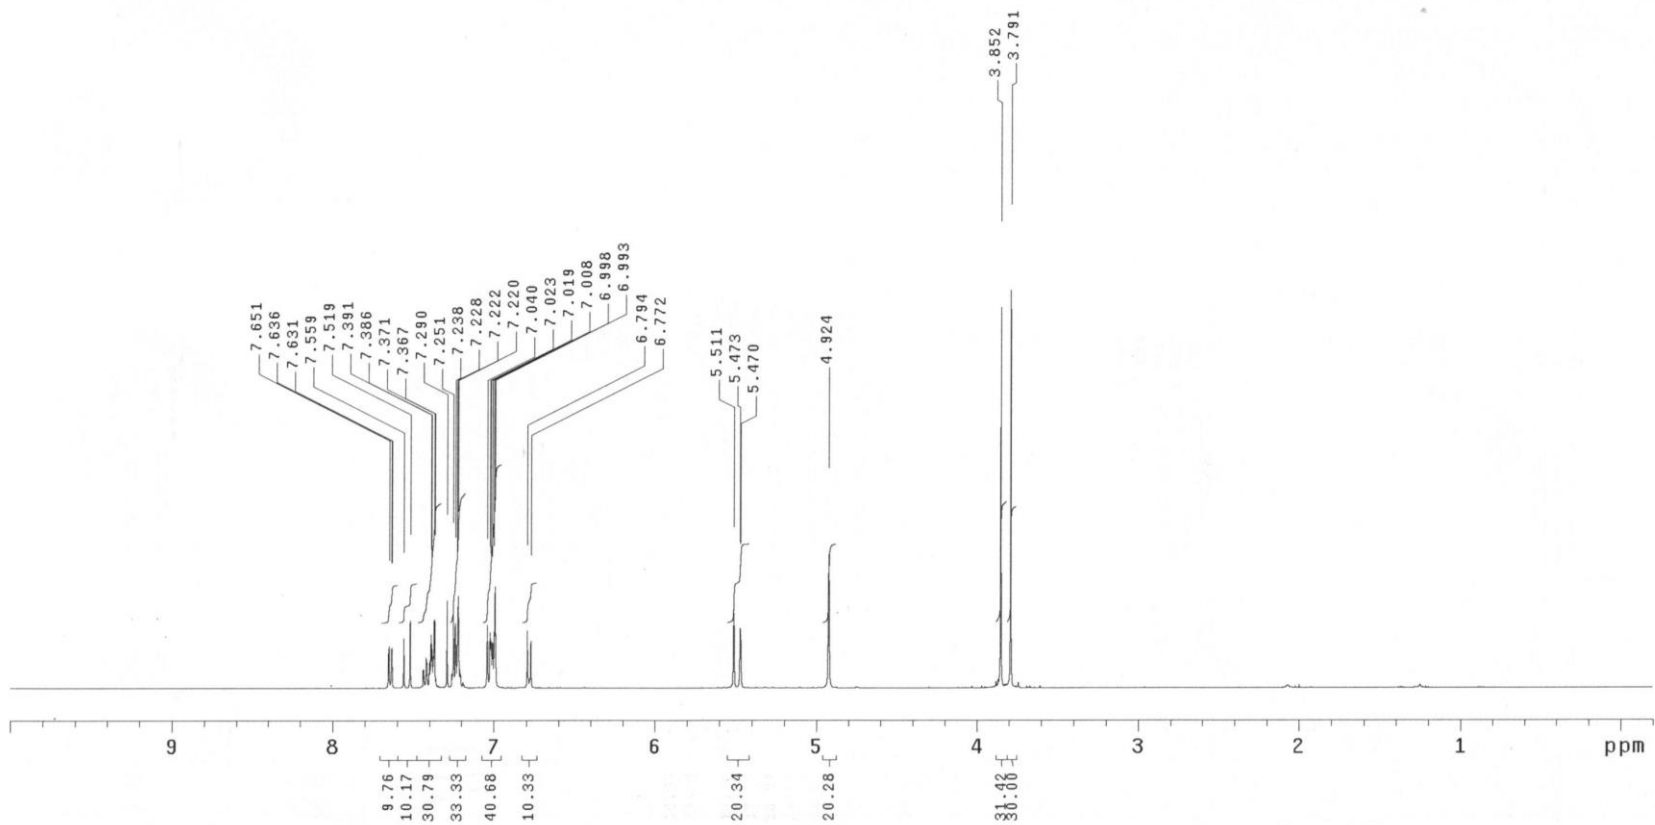

# Compound 5v (<sup>13</sup>C-NMR spectral data)

MC3,4-20Me Aldo1

Pulse Sequence: s2pu1

UNITYplus-400 "unity400"

Date: Apr 18 2019

Solvent: CDCl<sub>3</sub>

Ambient temperature

Total 720 repetitions

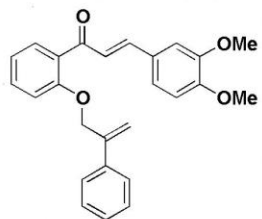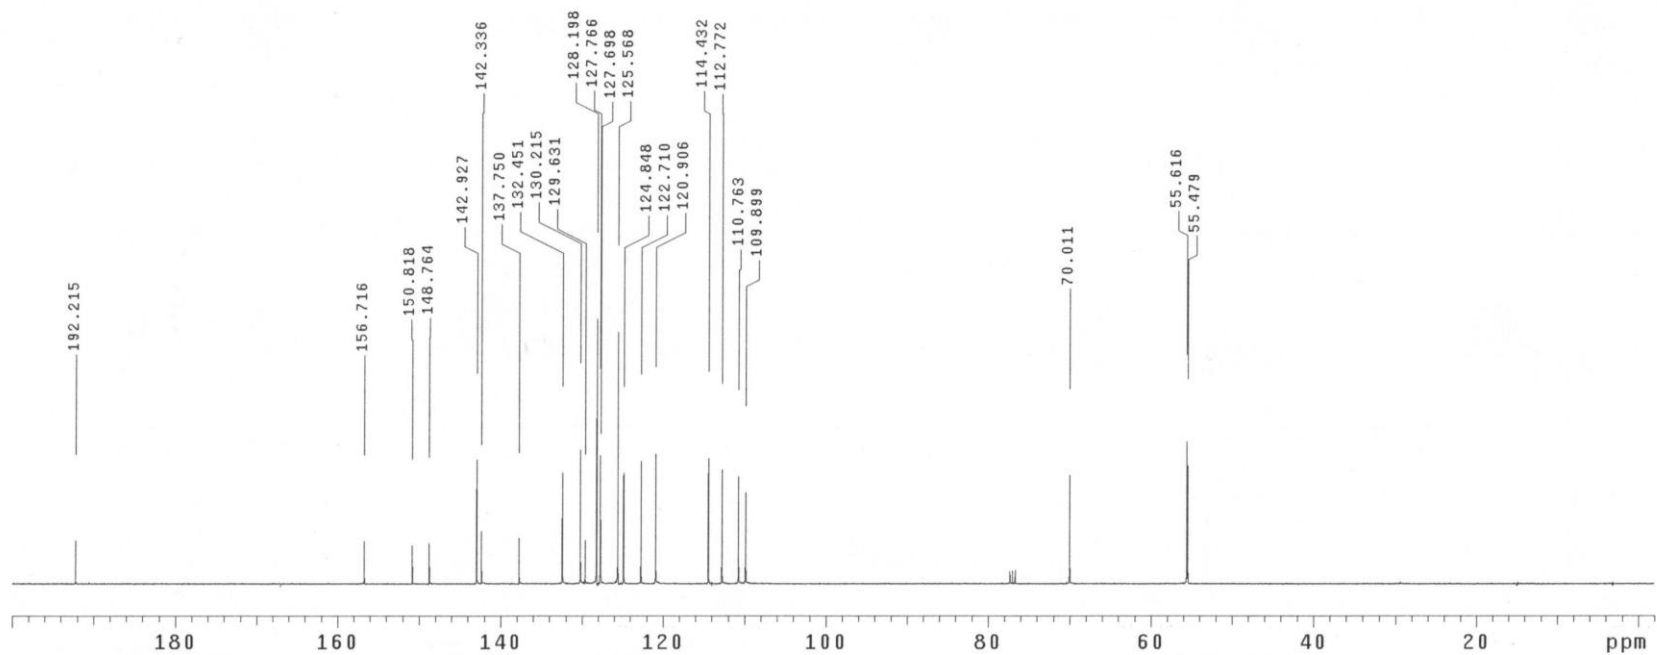

# Compound 5w (<sup>1</sup>H-NMR spectral data)

MC4-N02A1do1

Pulse Sequence: s2pu1

UNITYplus-400 "unity400"

Date: Apr 8 2019

Solvent: CDCl<sub>3</sub>

Ambient temperature

Total 32 repetitions

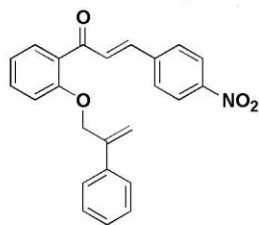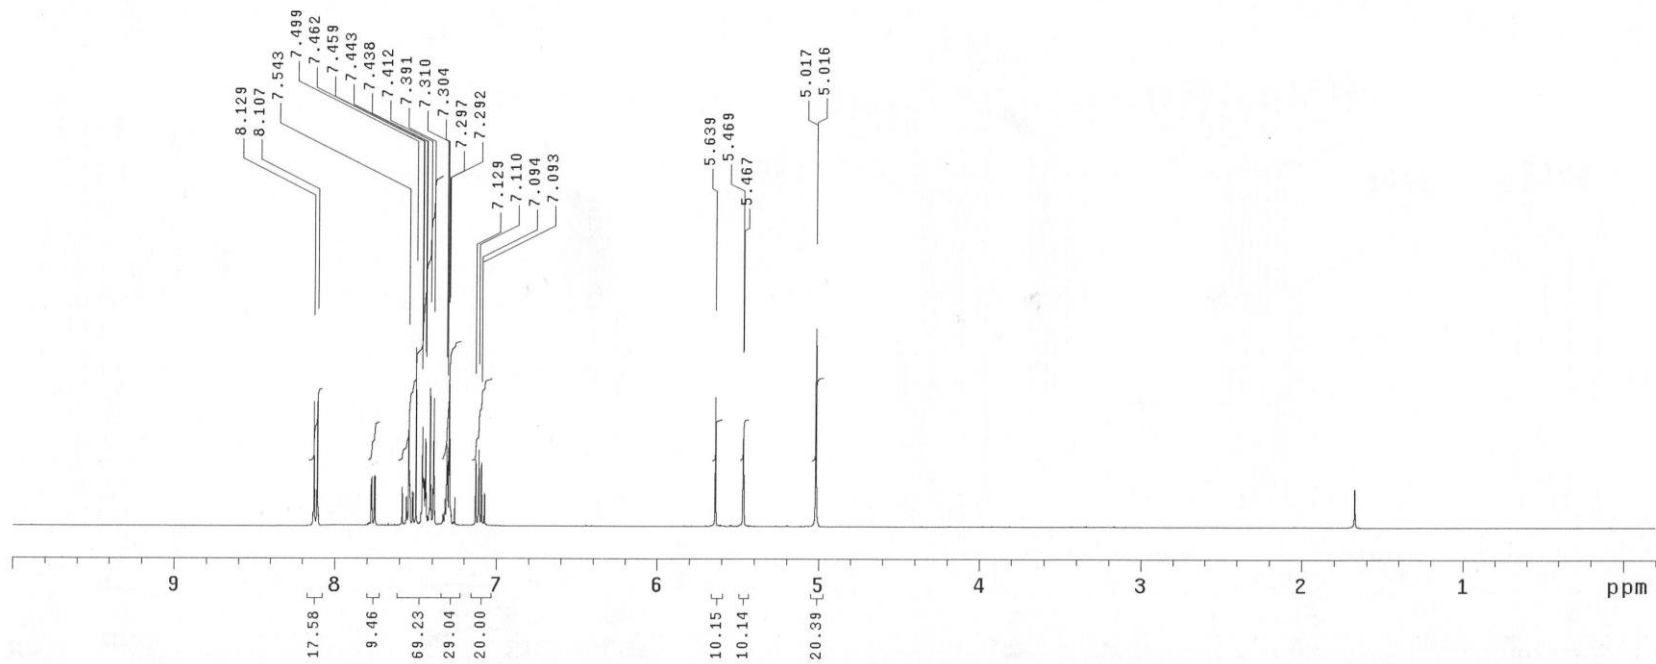



# Compound 5w (<sup>13</sup>C-NMR spectral data)

MC4-N02A1do1

Pulse Sequence: s2pu1

UNITYplus-400 "unity400"

Date: Apr 8 2019

Solvent: CDC13

Ambient temperature

Total 512 repetitions

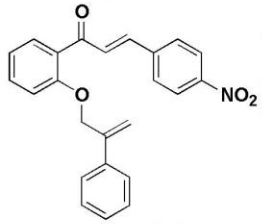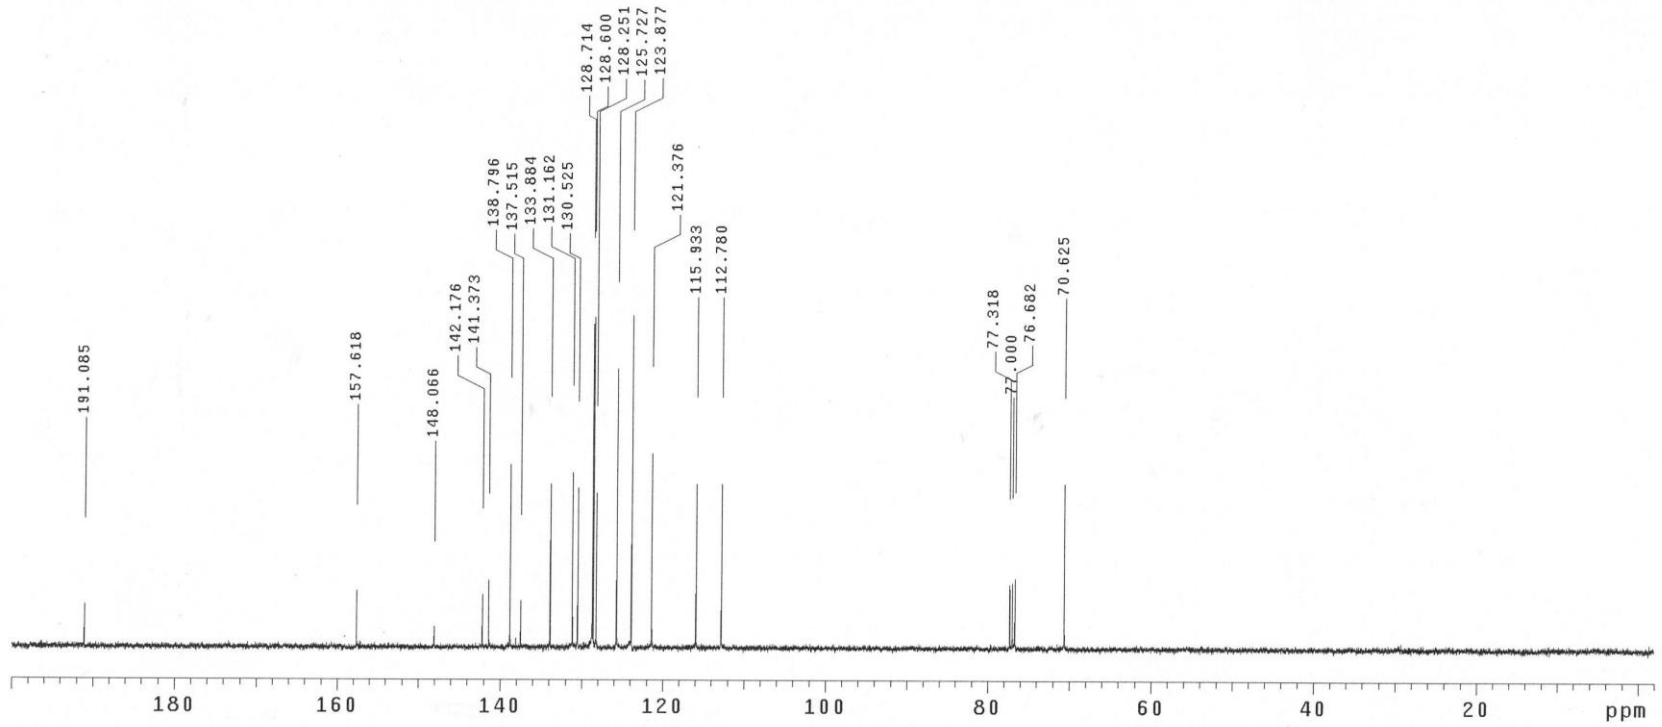

# Compound 5x (<sup>1</sup>H-NMR spectral data)

MC1080423

Pulse Sequence: s2pu1  
UNITYplus-400 "unity400"  
Date: Apr 23 2019  
Solvent: CDCl3  
Ambient temperature  
Total 32 repetitions

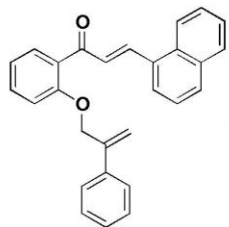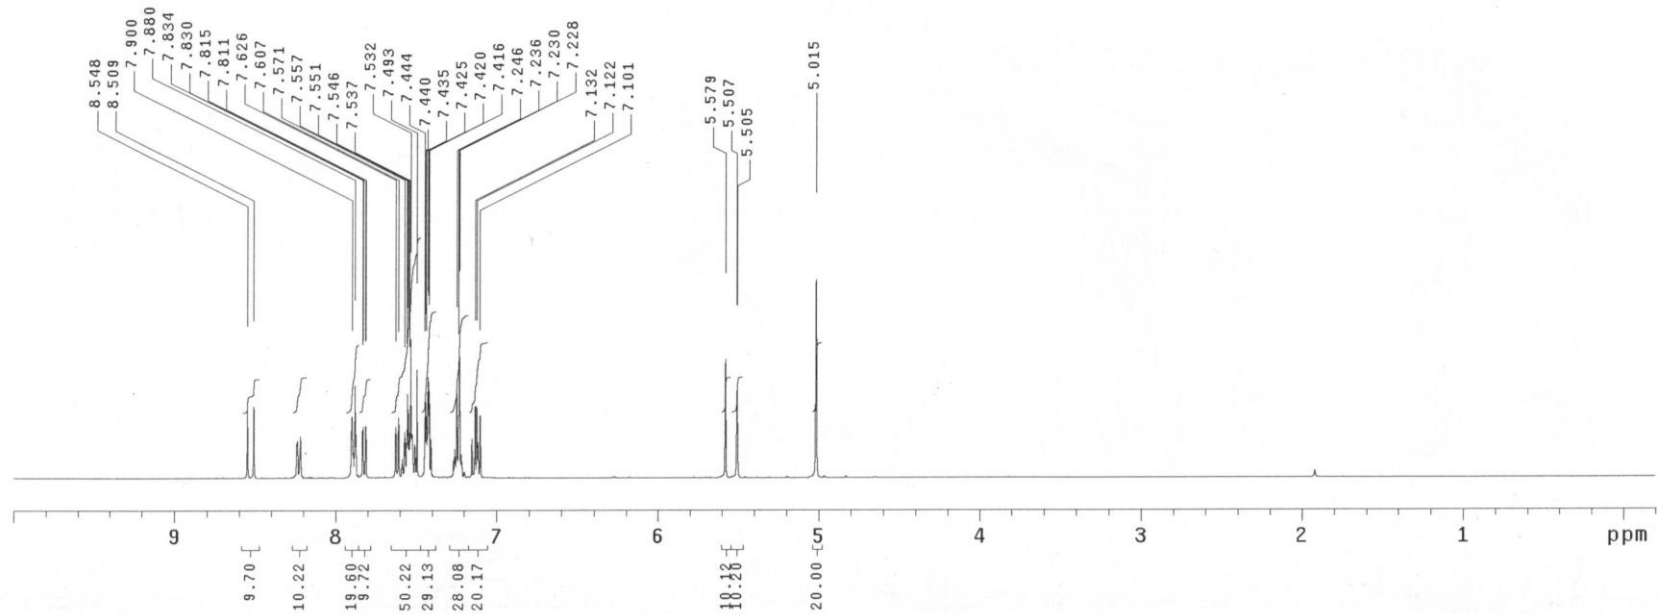

# Compound 5x (<sup>13</sup>C-NMR spectral data)

MC1080423

Pulse Sequence: s2pu1  
UNITYplus-400 "unity400"  
Date: Apr 23 2019  
Solvent: CDCl<sub>3</sub>  
Ambient temperature  
Total 176 repetitions

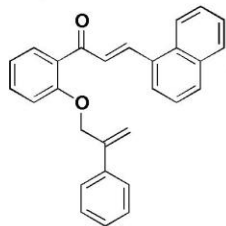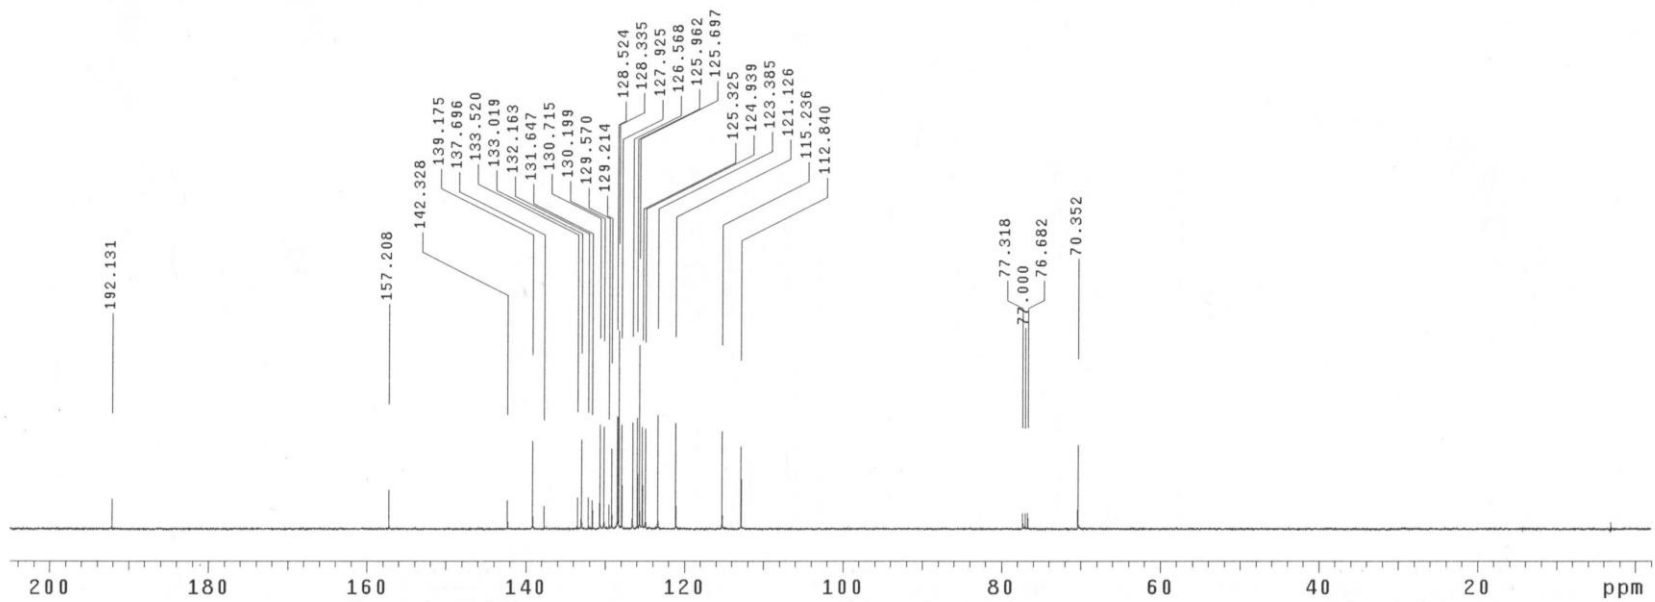

# Compound 5y (<sup>1</sup>H-NMR spectral data)

MC1080415

Pulse Sequence: s2pu1  
UNITYplus-400 "unity400"  
Date: Apr 15 2019  
Solvent: CDC13  
Ambient temperature  
Total 32 repetitions

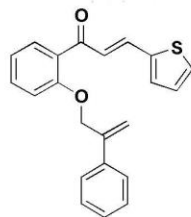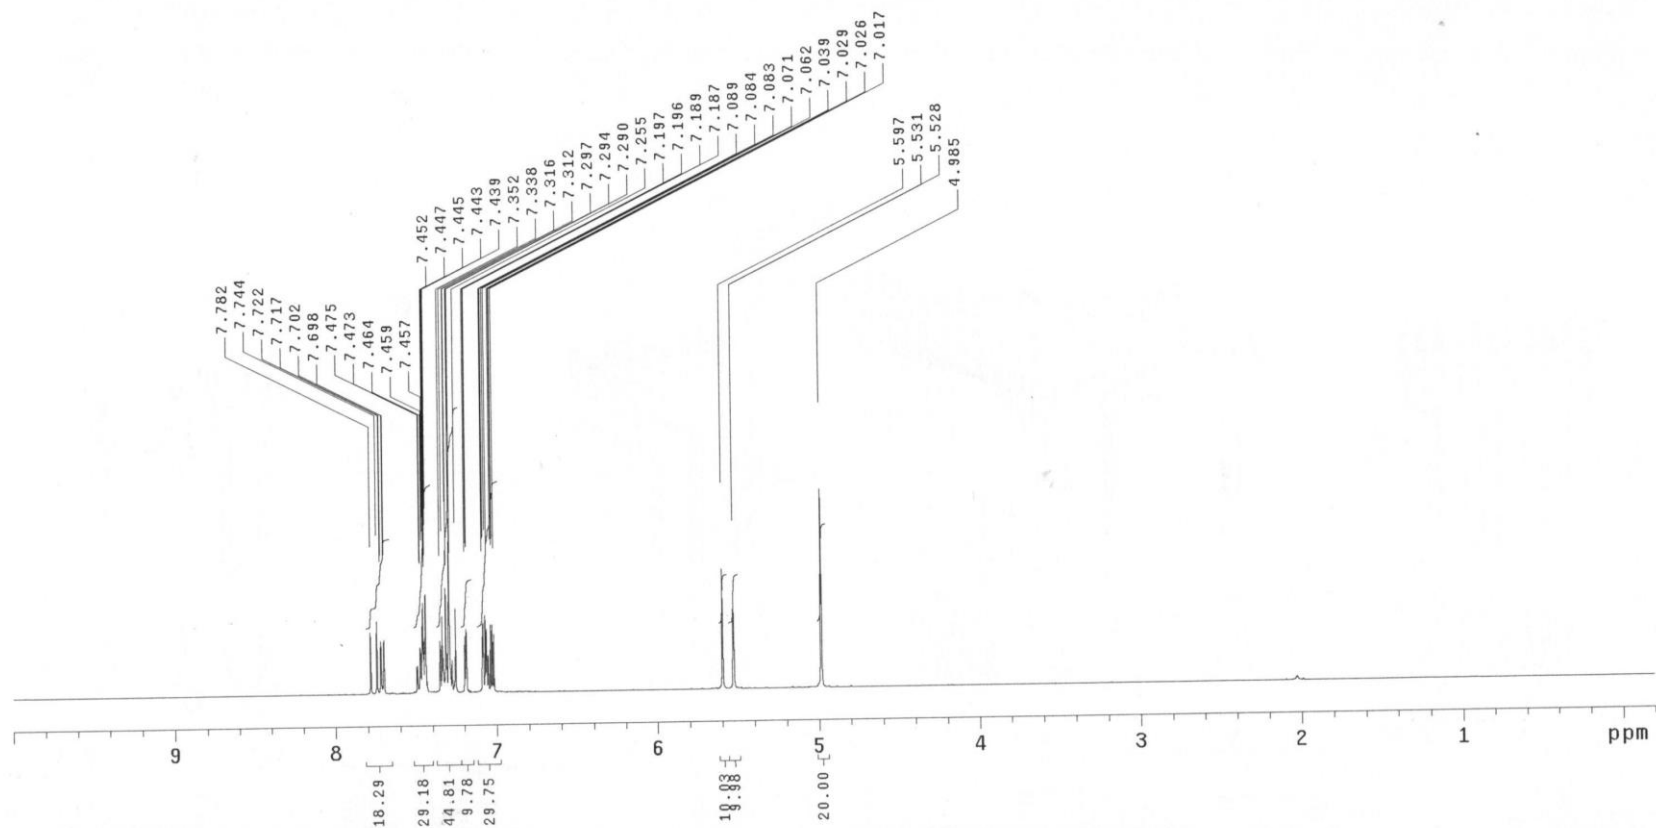

# Compound 5y (<sup>13</sup>C-NMR spectral data)

MC1080415

Pulse Sequence: s2pu1

UNITYplus-400 "unity400"

Date: Apr 15 2019

Solvent: CDCl<sub>3</sub>

Ambient temperature

Total 752 repetitions

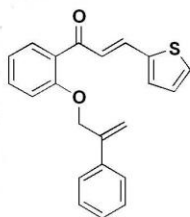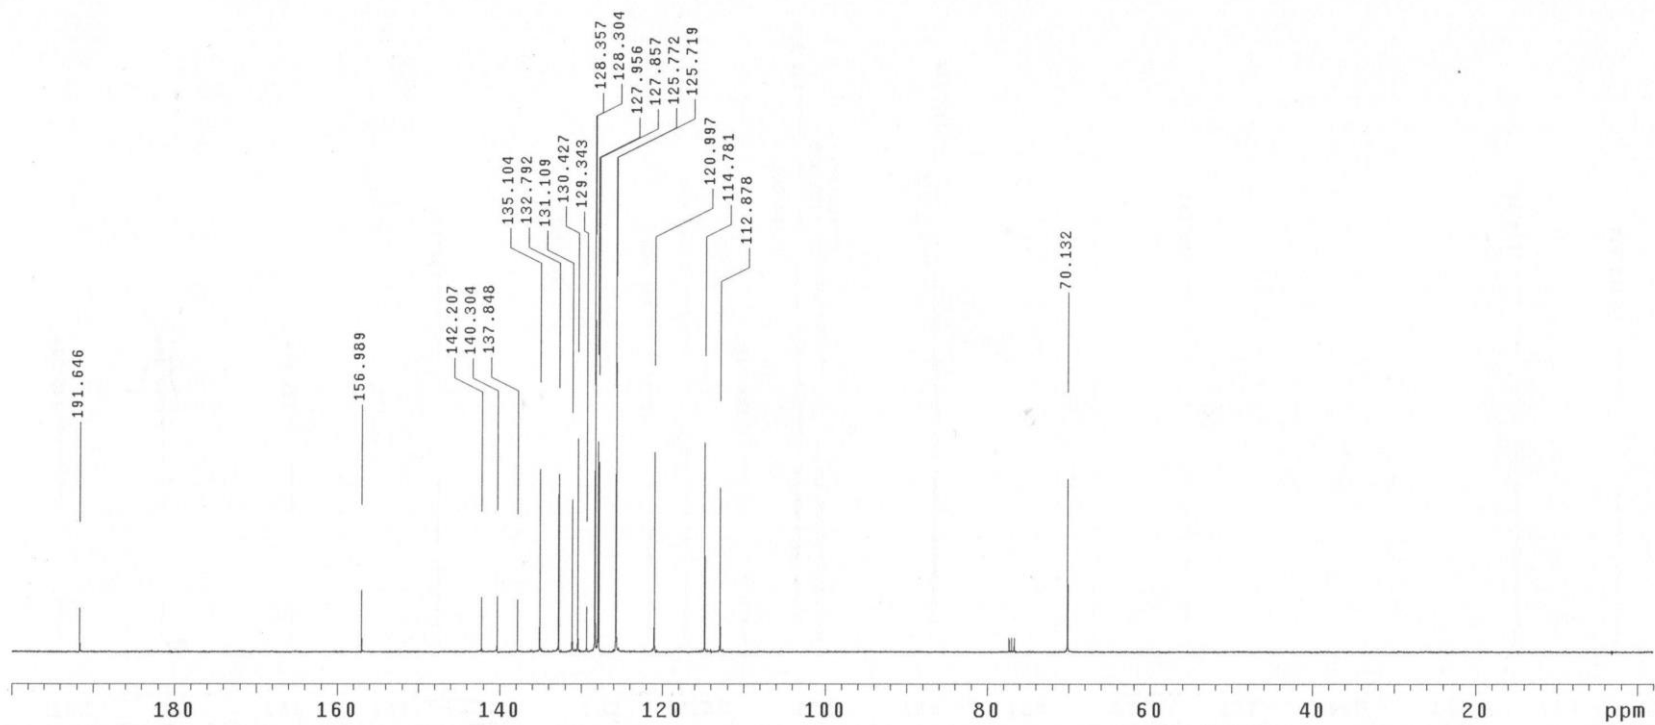

# Compound 5z (<sup>1</sup>H-NMR spectral data)

MCCr20Me

Pulse Sequence: s2pu1

UNITYplus-400 "unity400"

Date: May 16 2019

Solvent: CDCl<sub>3</sub>

Ambient temperature

Total 32 repetitions

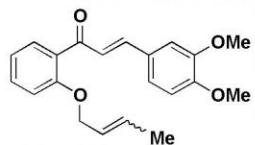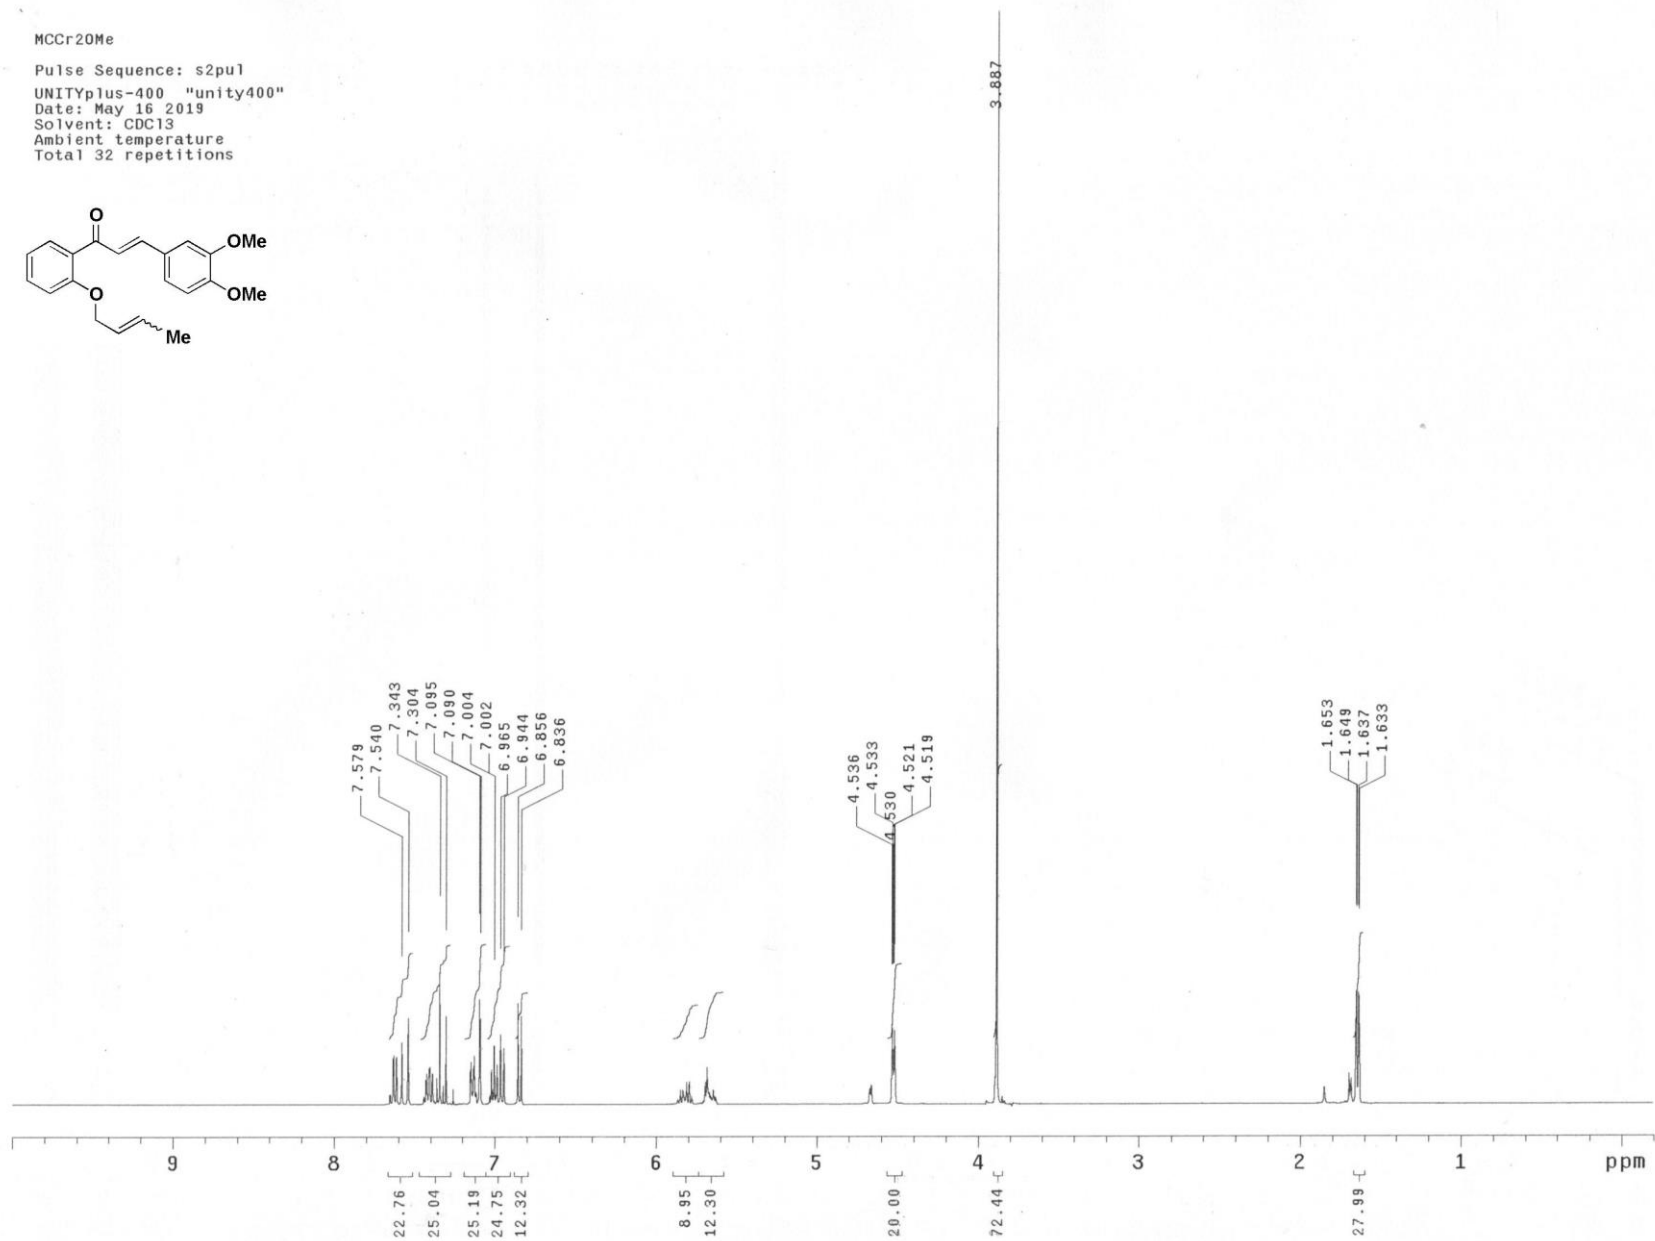

# Compound 5z (<sup>13</sup>C-NMR spectral data)

MCCr20Me

Pulse Sequence: s2pu1

UNITYplus-400 "unity400"

Date: May 16 2019

Solvent: CDCl<sub>3</sub>

Ambient temperature

Total 544 repetitions

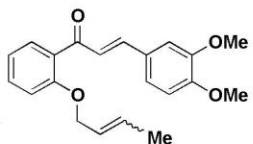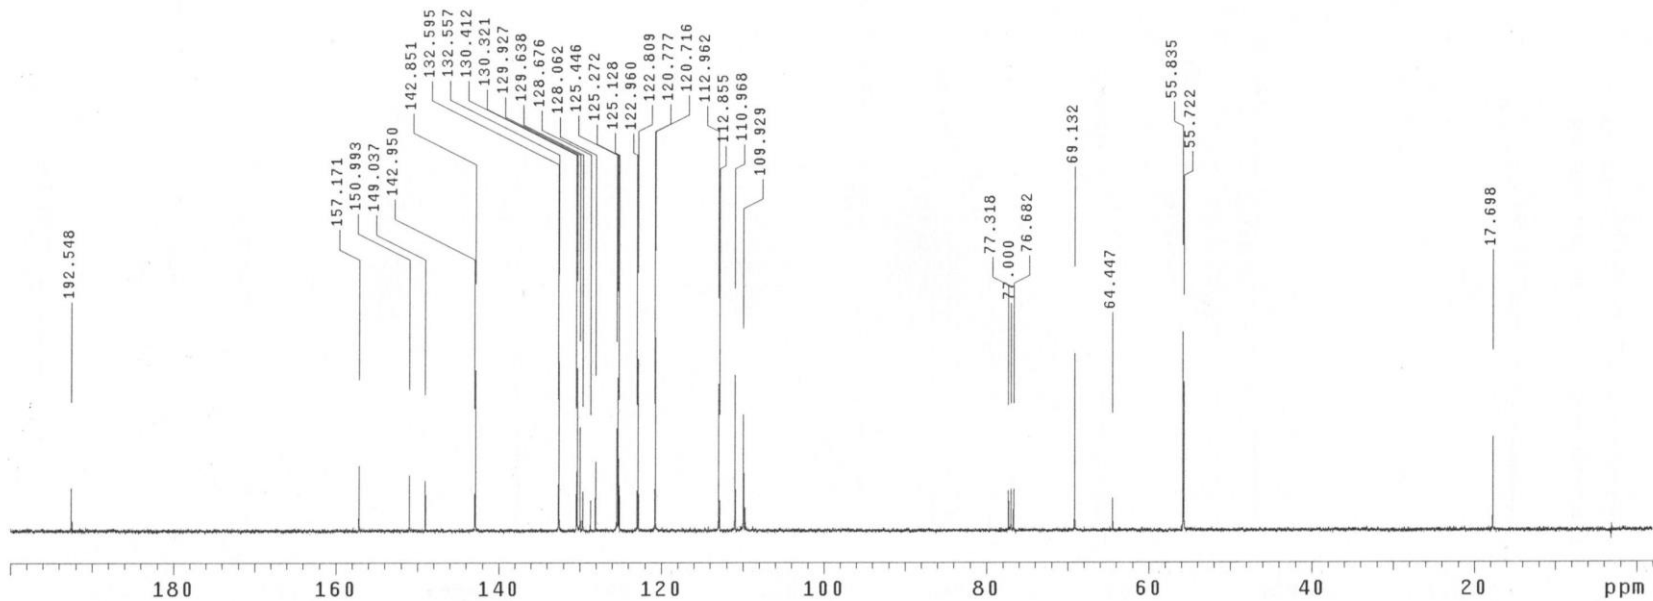

# Compound 5aa (<sup>1</sup>H-NMR spectral data)

MC1NACr

Pulse Sequence: s2pu1  
UNITYplus-400 "unity400"  
Date: May 10 2019  
Solvent: CDCl<sub>3</sub>  
Ambient temperature  
Total 32 repetitions

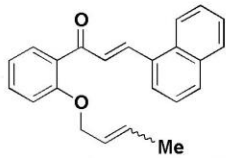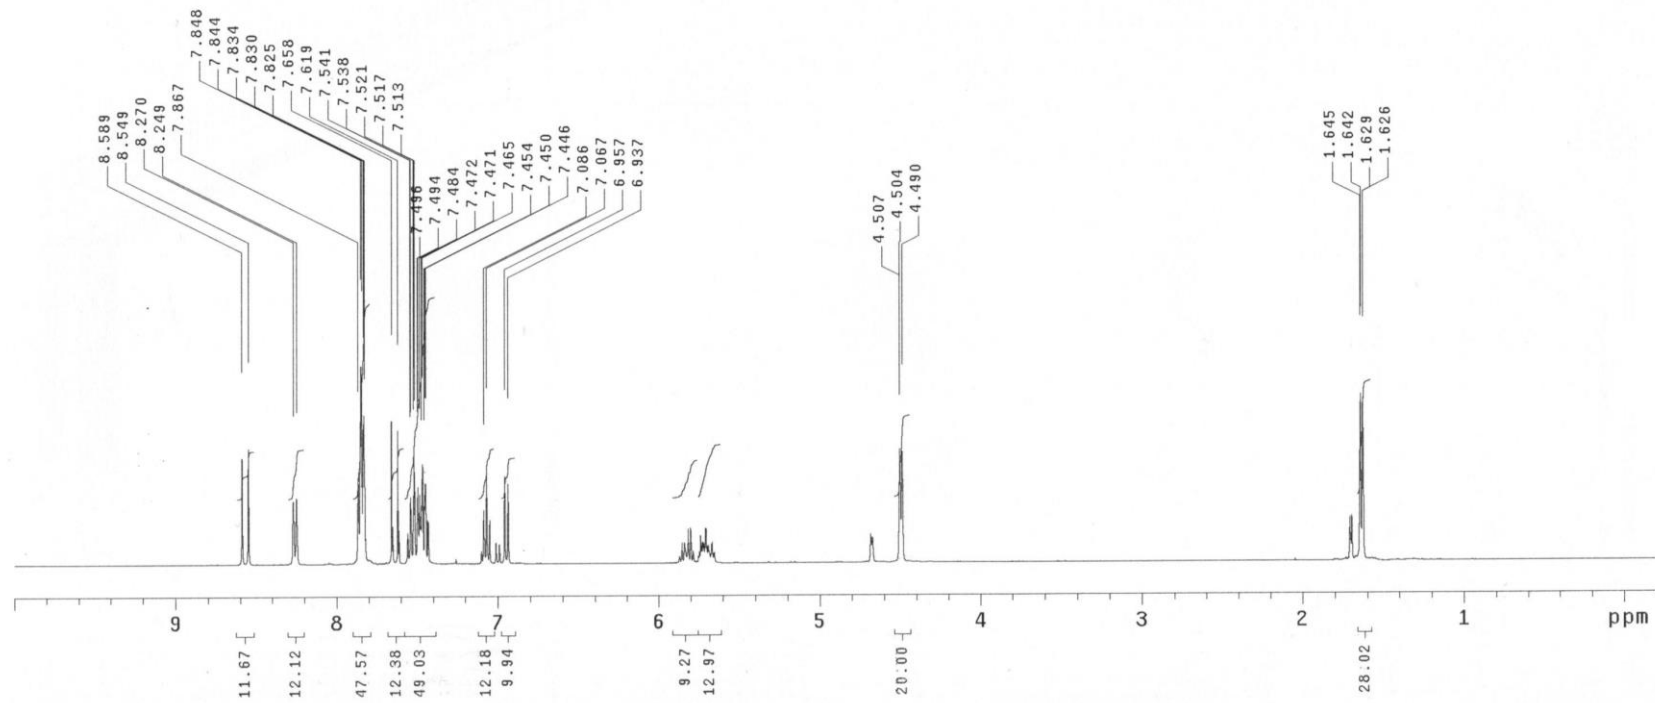



# Compound 5aa (<sup>13</sup>C-NMR spectral data)

MC1NACr

Pulse Sequence: s2pu1

UNITYplus-400 "unity400"

Date: May 10 2019

Solvent: CDC13

Ambient temperature

Total 128 repetitions

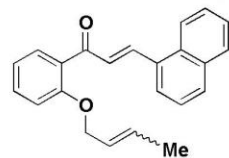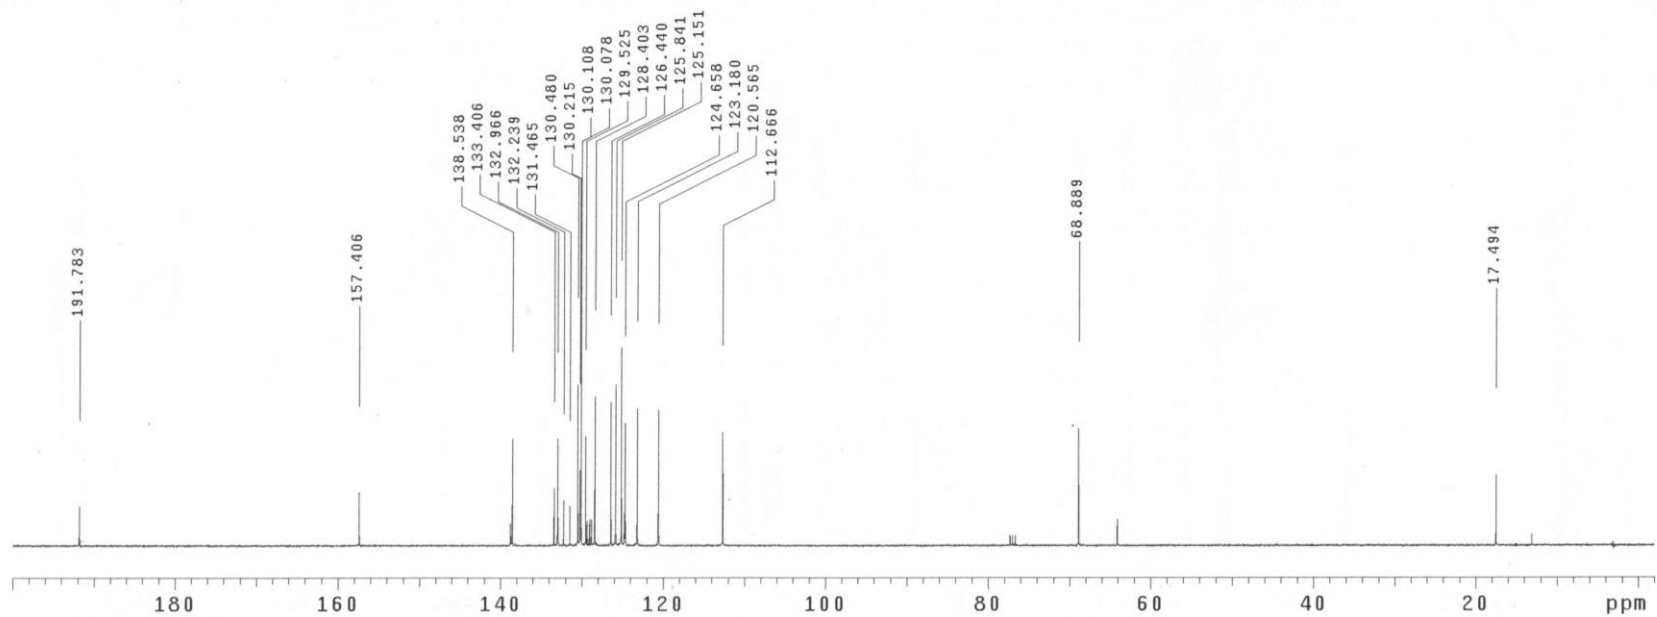

# Compound 5ab (<sup>1</sup>H-NMR spectral data)

MCCrS

Pulse Sequence: s2pu1  
UNITYplus-400 "unity400"  
Date: May 20 2019  
Solvent: CDCl<sub>3</sub>  
Ambient temperature  
Total 32 repetitions

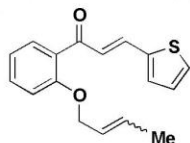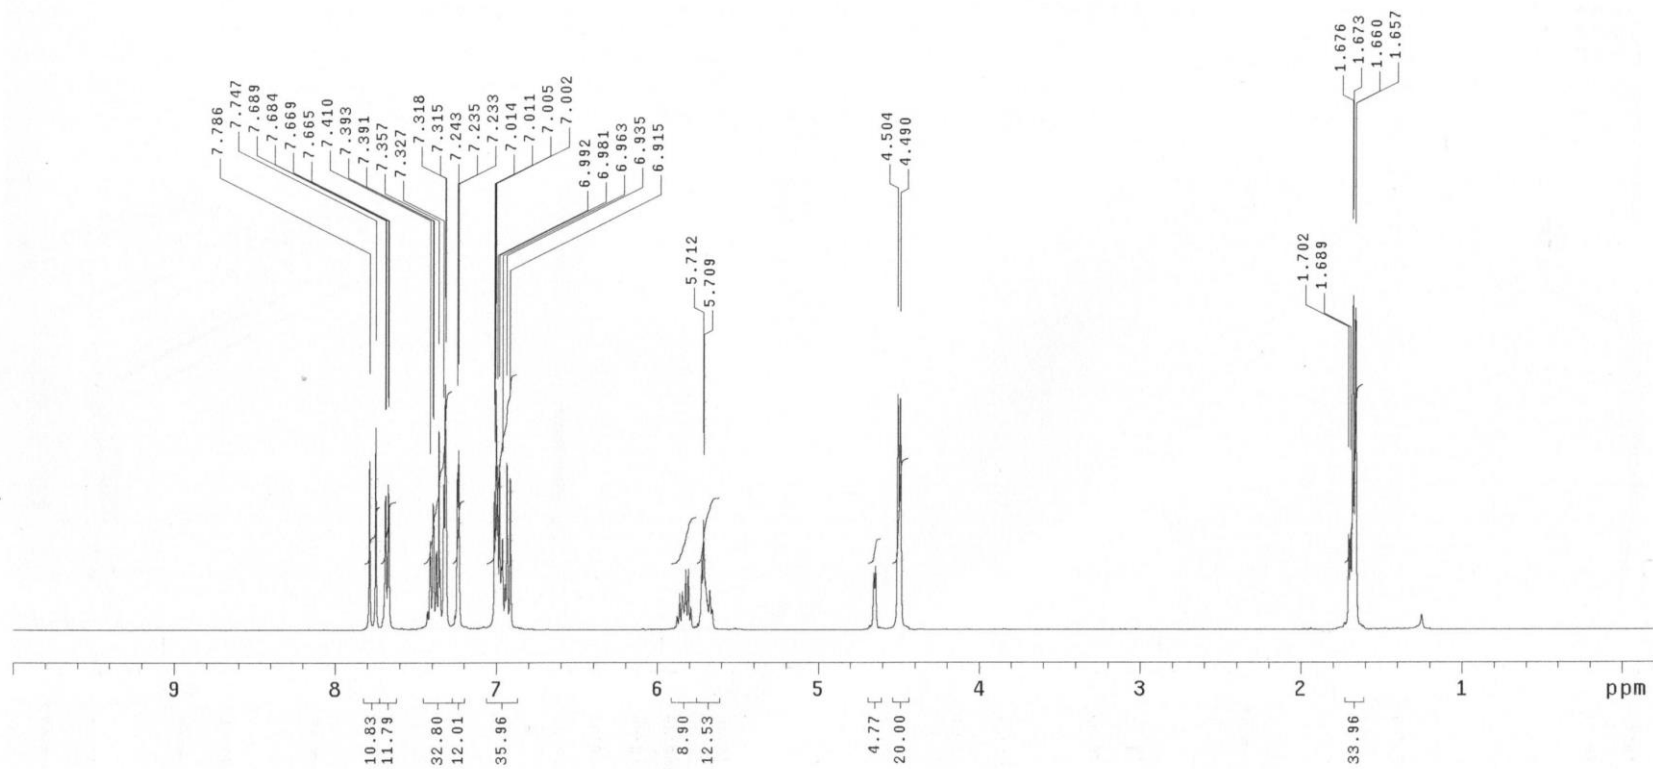

# Compound 5ab (<sup>13</sup>C-NMR spectral data)

MCCrS

Pulse Sequence: s2pu1  
UNITYplus-400 "unity400"  
Date: May 20 2019  
Solvent: CDCl<sub>3</sub>  
Ambient temperature  
Total 224 repetitions

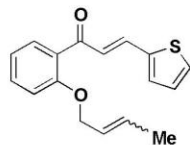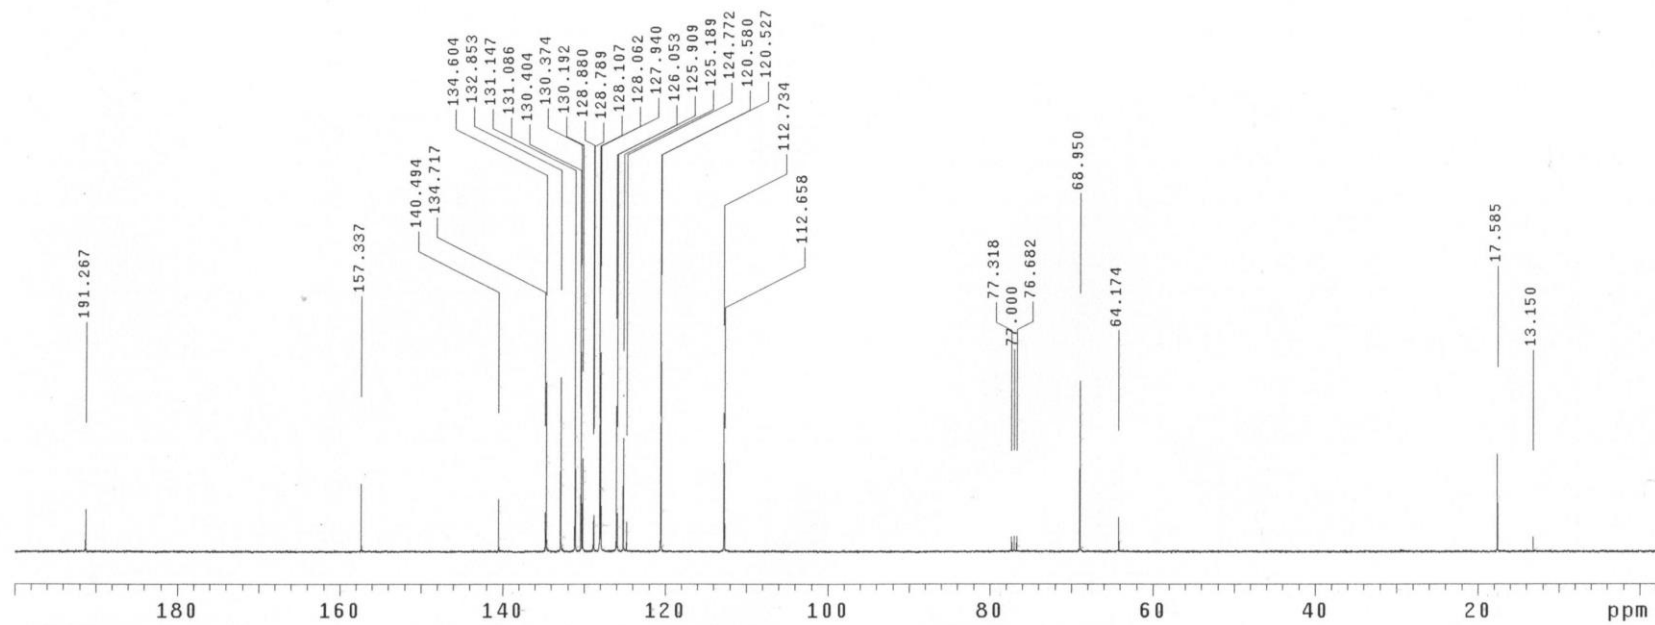

# Compound 5ac (<sup>1</sup>H-NMR spectral data)

MCprenyl

Pulse Sequence: s2pu1  
Mercury-400BB "MerPlus400"  
Date: May 22 2019  
Solvent: cdc13  
Ambient temperature  
Total 32 repetitions

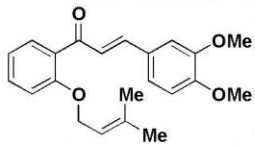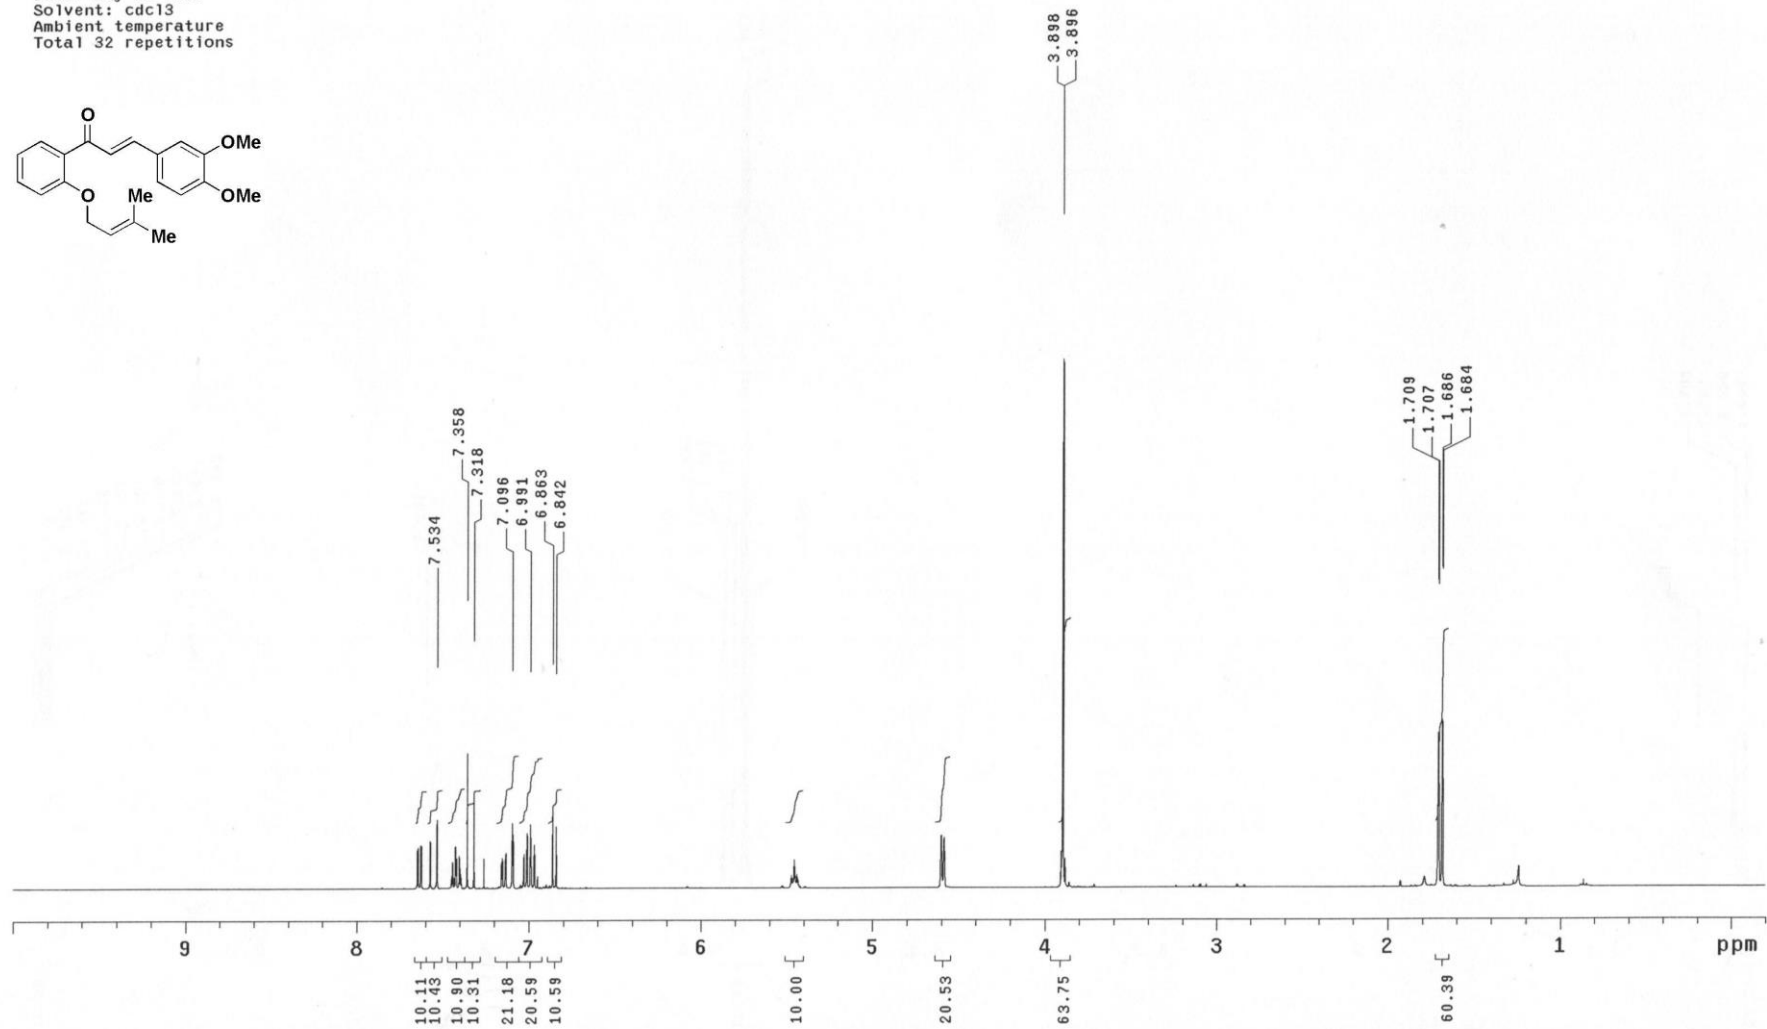

# Compound 5ac (<sup>13</sup>C-NMR spectral data)

MCprenyl1

Pulse Sequence: s2pu1  
Mercury-400BB "MerPlus400"  
Date: May 22 2019  
Solvent: cdCl3  
Ambient temperature  
Total 256 repetitions

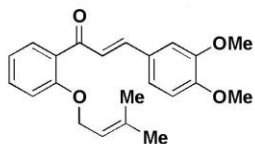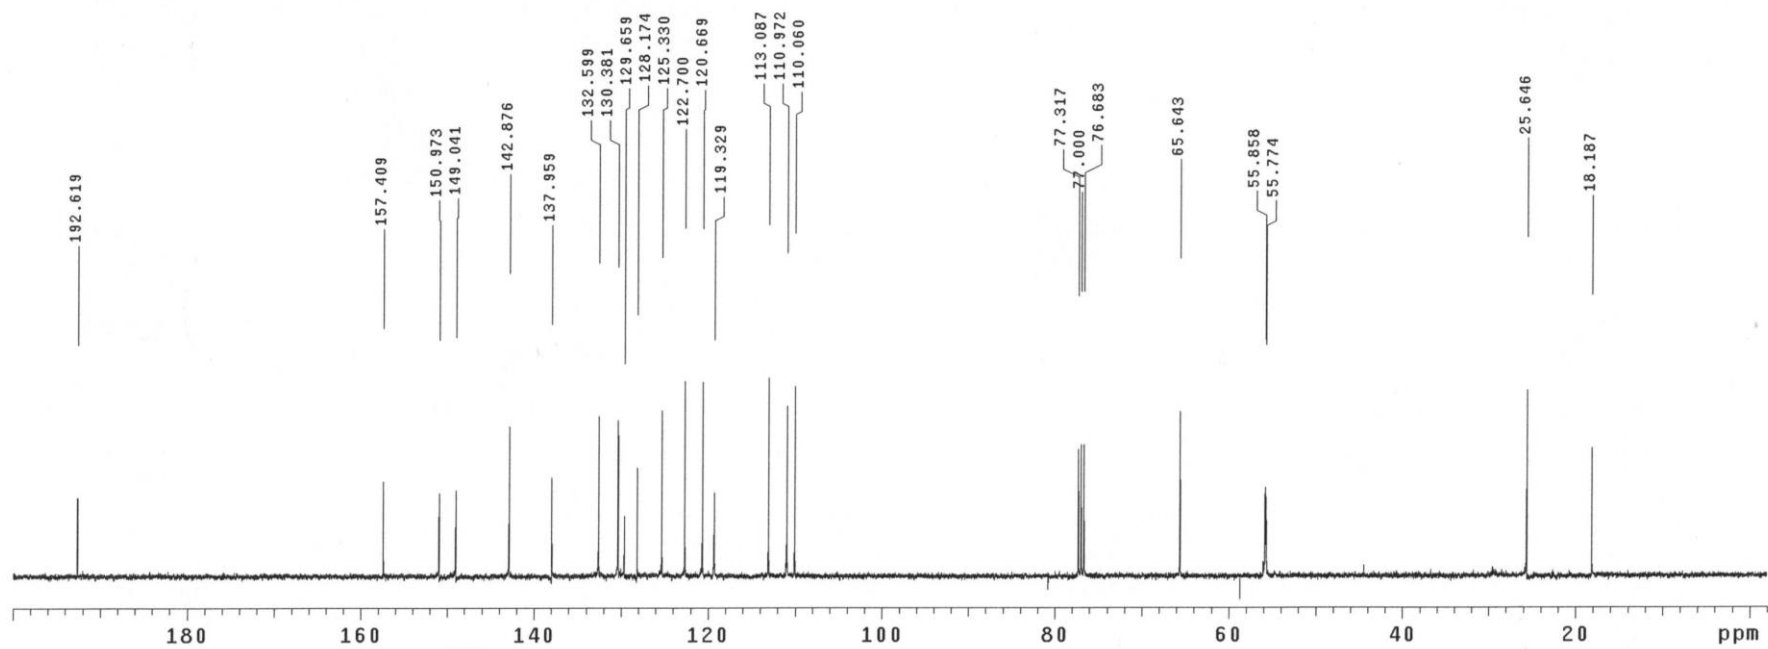

# Compound 5ad (<sup>1</sup>H-NMR spectral data)

MC1080610

Pulse Sequence: s2pu1  
UNITYplus-400 "unity400"  
Date: Jun 10 2019  
Solvent: CDCl<sub>3</sub>  
Ambient temperature  
Total 32 repetitions

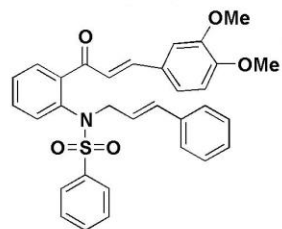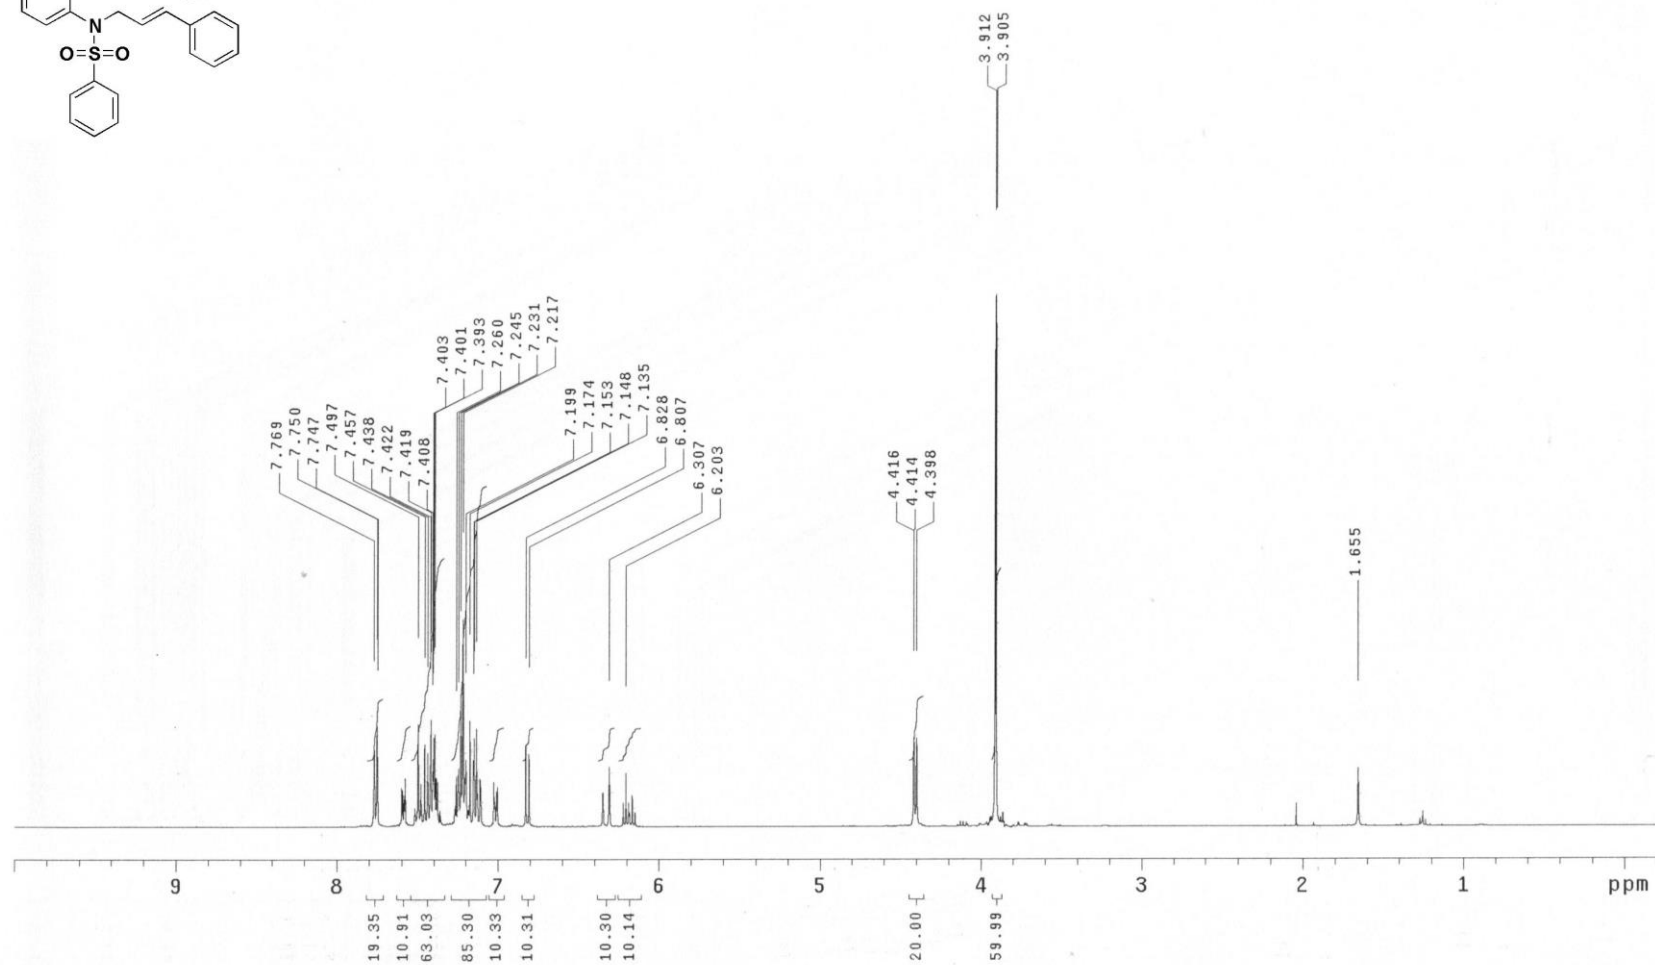

# Compound 5ad (<sup>13</sup>C-NMR spectral data)

MC1080610

Pulse Sequence: s2pu1  
UNITYplus-400 "unity400"  
Date: Jun 10 2019  
Solvent: CDC13  
Ambient temperature  
Total 3296 repetitions

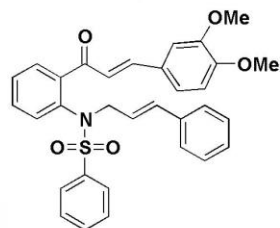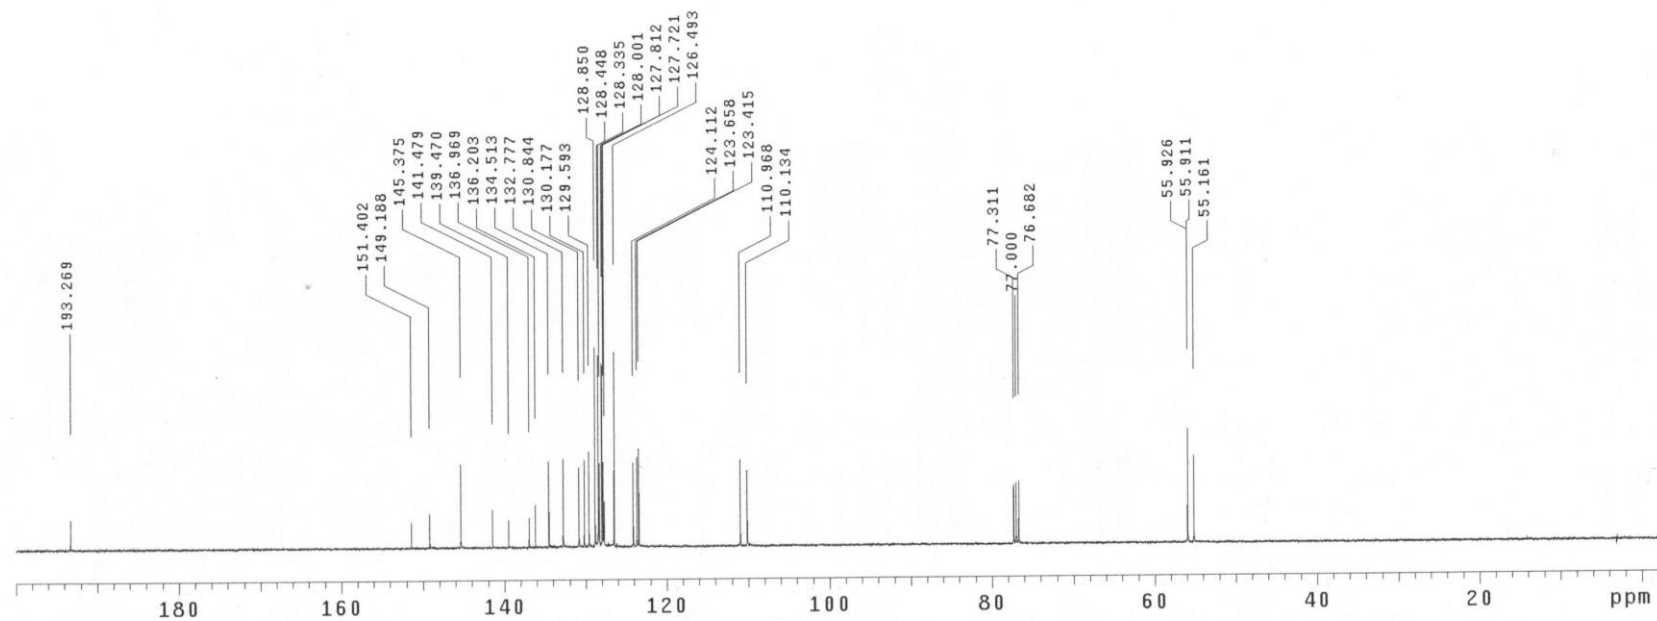

# Compound 5ae (<sup>1</sup>H-NMR spectral data)

MC1080430

Pulse Sequence: s2pu1

UNITYplus-400 "unity400"

Date: May 2 2019

Solvent: CDCl<sub>3</sub>

Ambient temperature

Total 32 repetitions

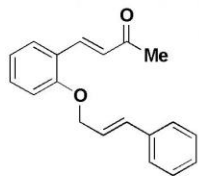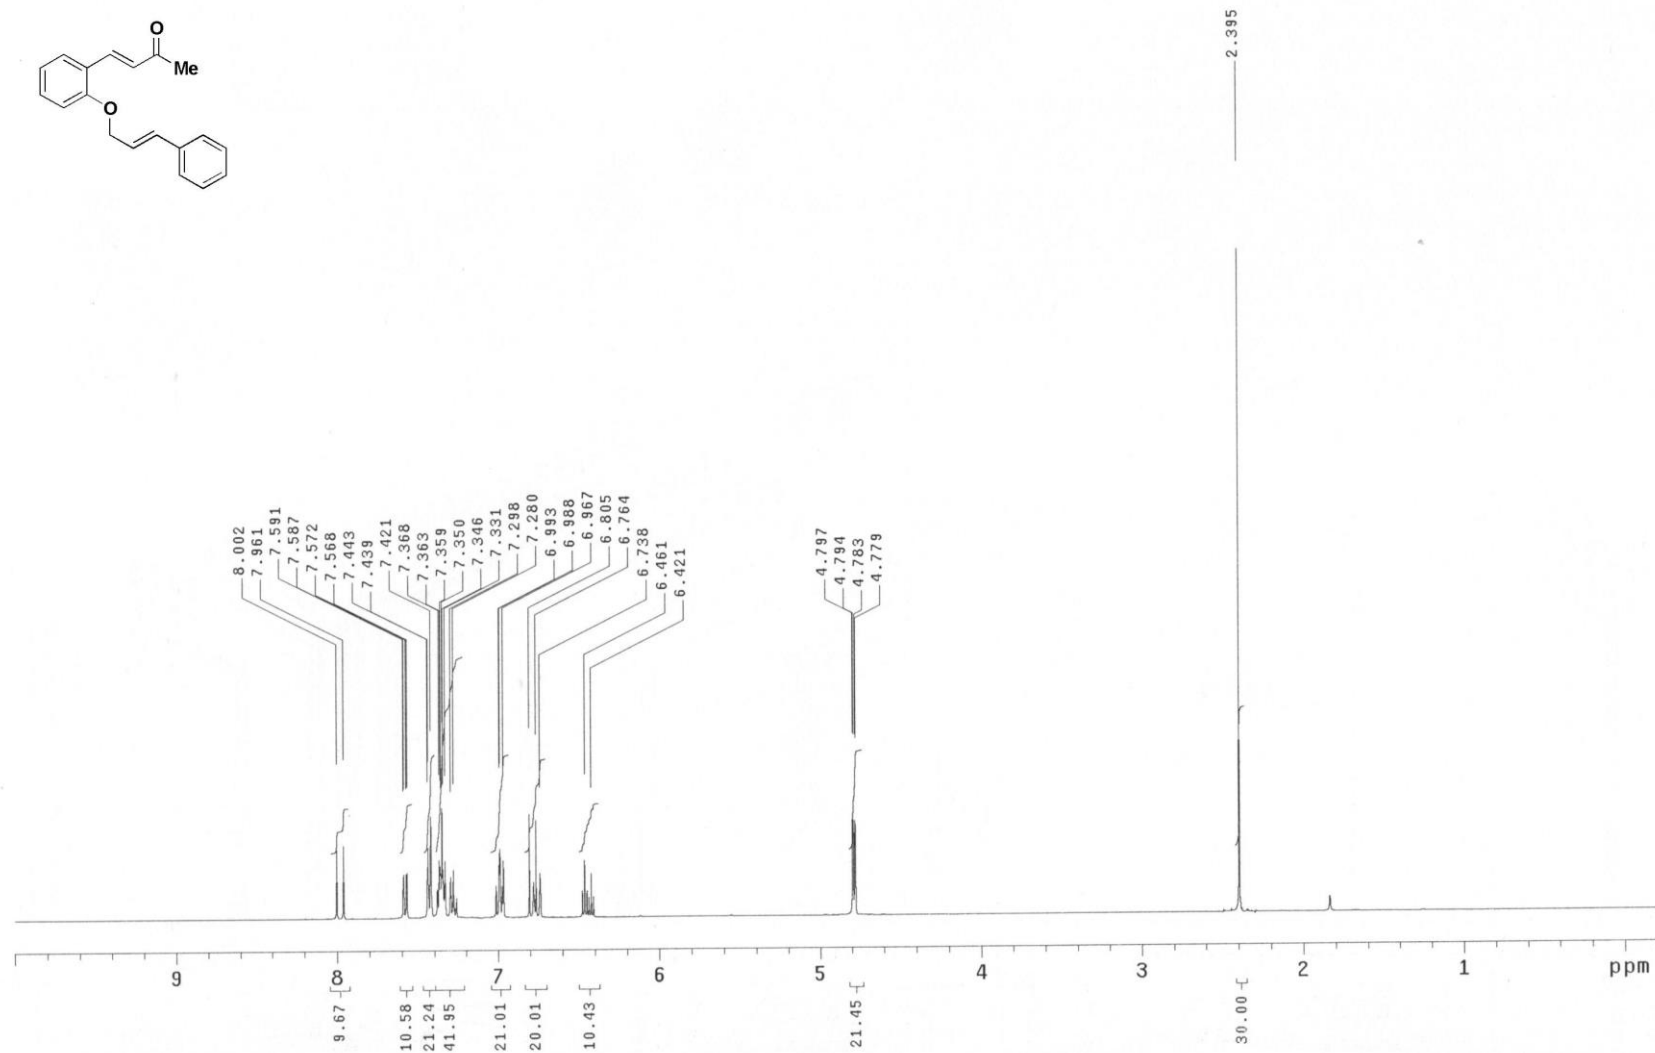



# Compound 5ae (<sup>13</sup>C-NMR spectral data)

MC1080430

Pulse Sequence: s2pu1  
UNITYplus-400 "unity400"  
Date: May 2 2019  
Solvent: CDC13  
Ambient temperature  
Total 256 repetitions

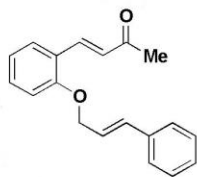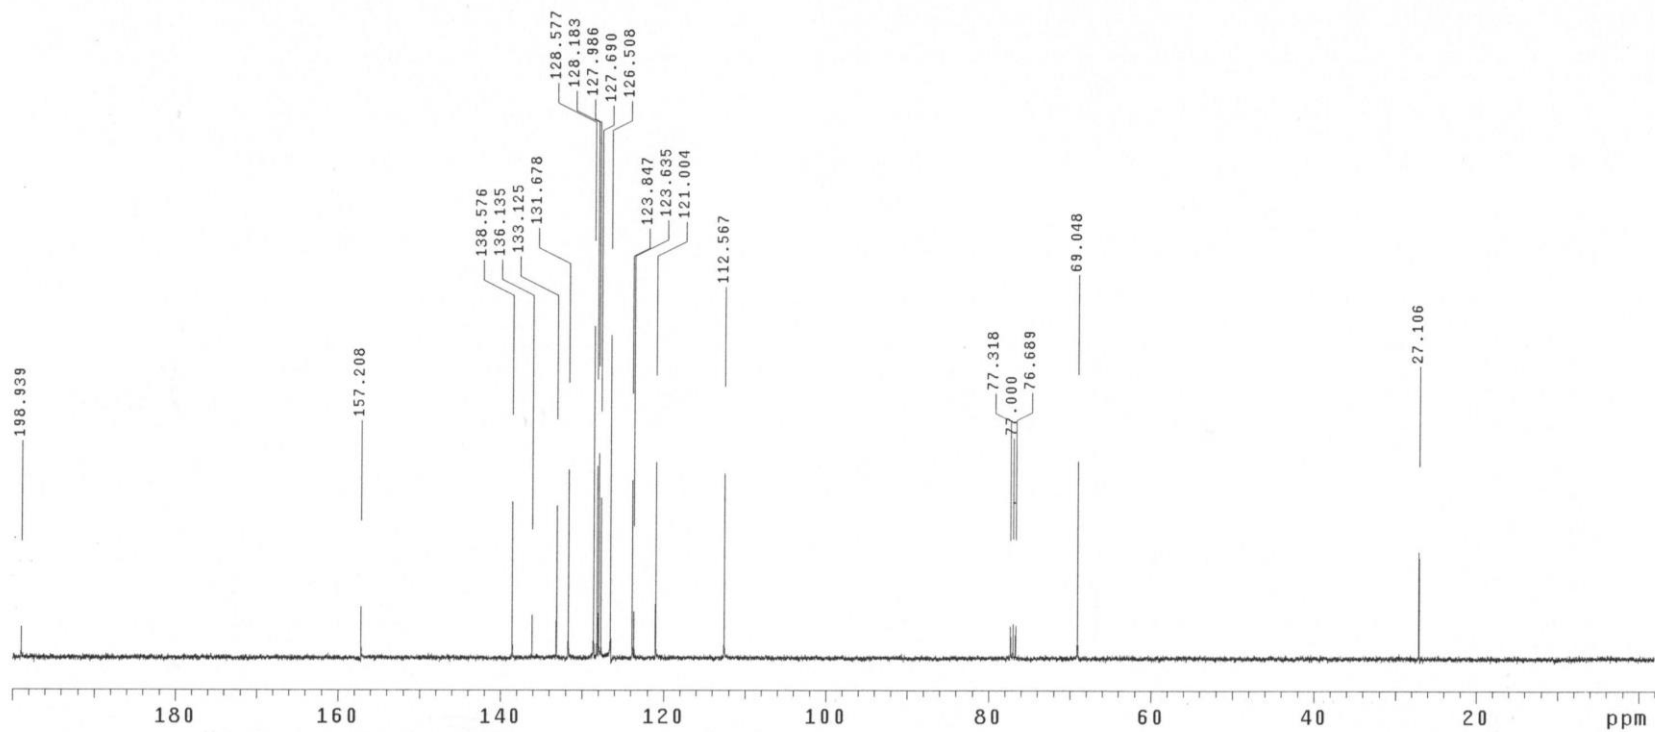

# Compound 6a (<sup>1</sup>H-NMR spectral data)

MC1080218

Pulse Sequence: s2pu1

UNITYplus-400 "unity400"

Date: Mar 14 2019

Solvent: CDCl<sub>3</sub>

Ambient temperature

Total 32 repetitions

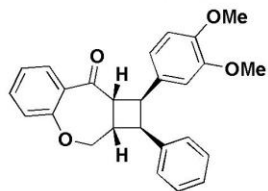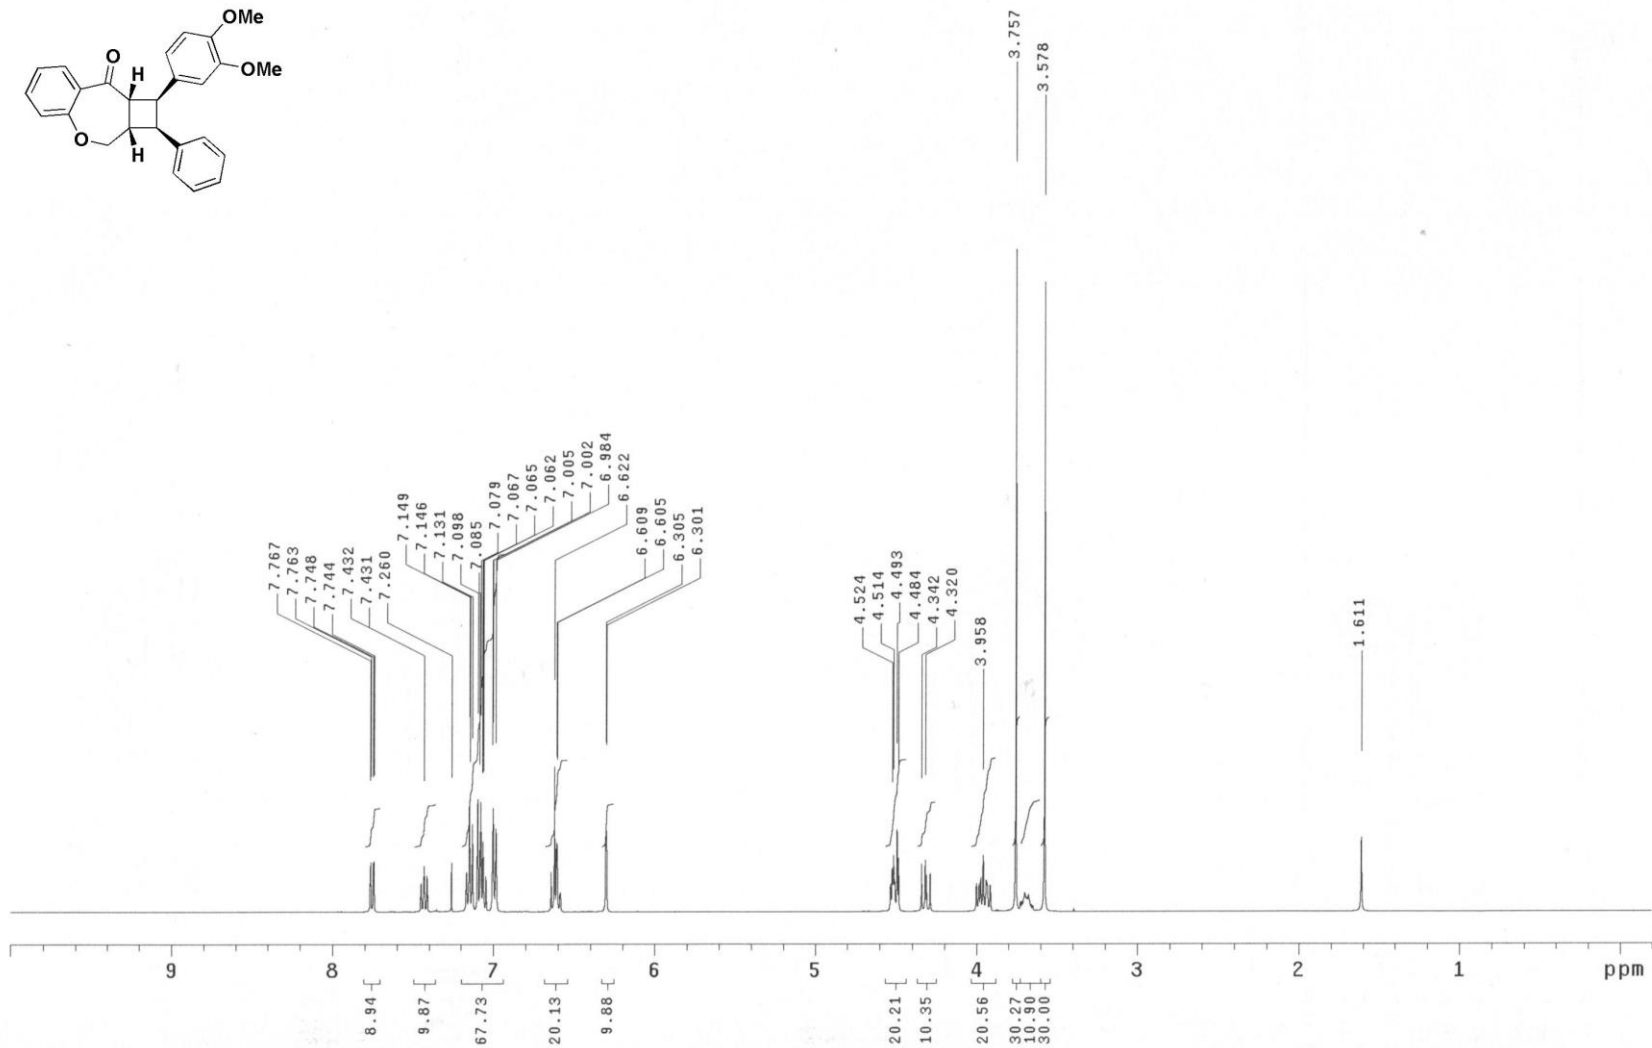

# Compound 6a (<sup>13</sup>C-NMR spectral data)

MC1080218

Pulse Sequence: s2pu1

UNITYplus-400 "unity400"

Date: Mar 14 2019

Solvent: CDCl<sub>3</sub>

Ambient temperature

Total 1600 repetitions

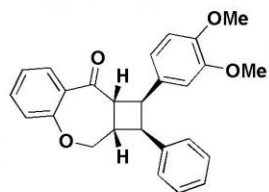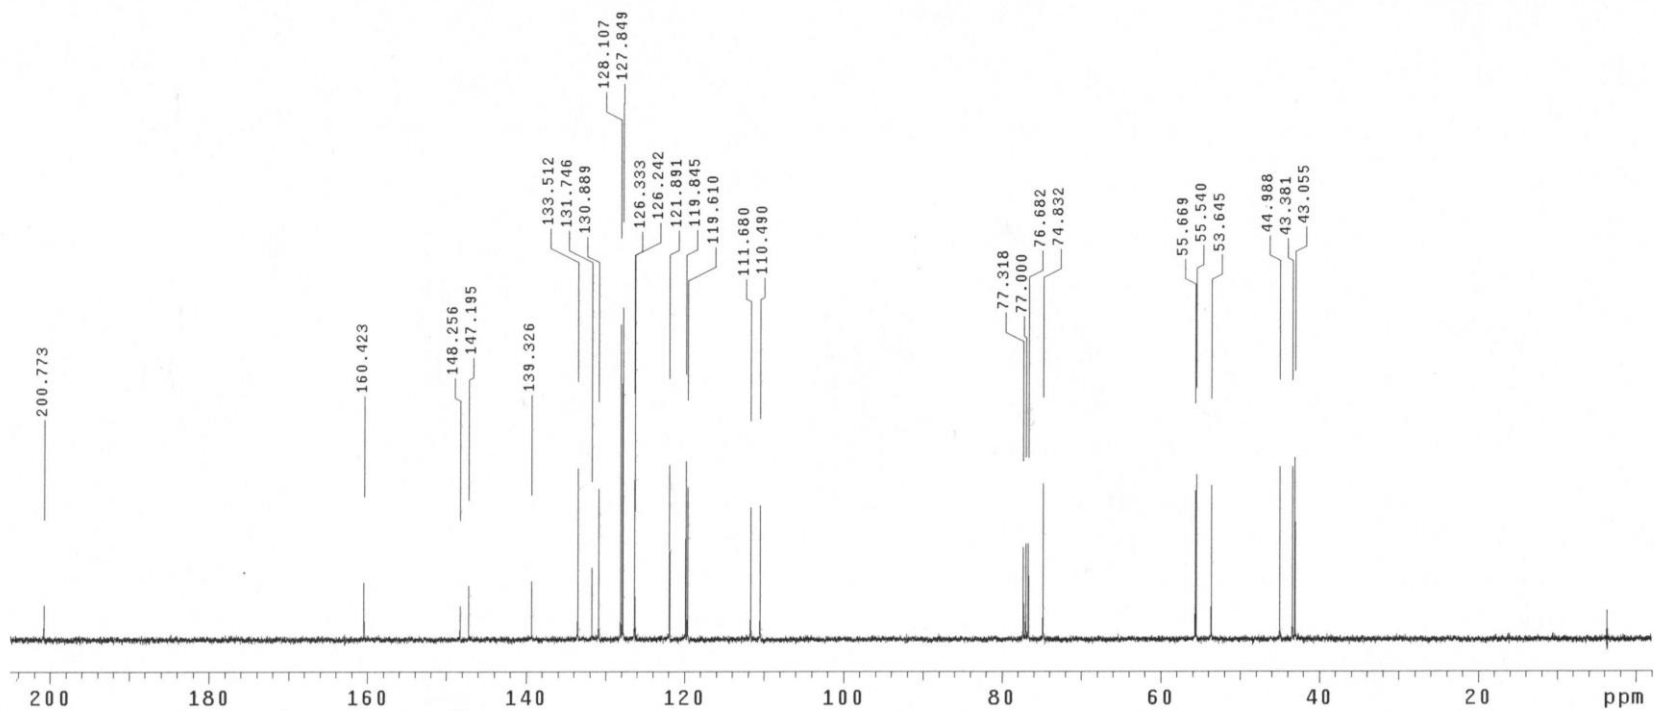

# Compound 6b (<sup>1</sup>H-NMR spectral data)

MC1080322

Pulse Sequence: s2pu1  
UNITYplus-400 "unity400"  
Date: Apr 30 2019  
Solvent: CDCl<sub>3</sub>  
Ambient temperature  
Total 32 repetitions

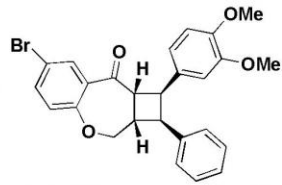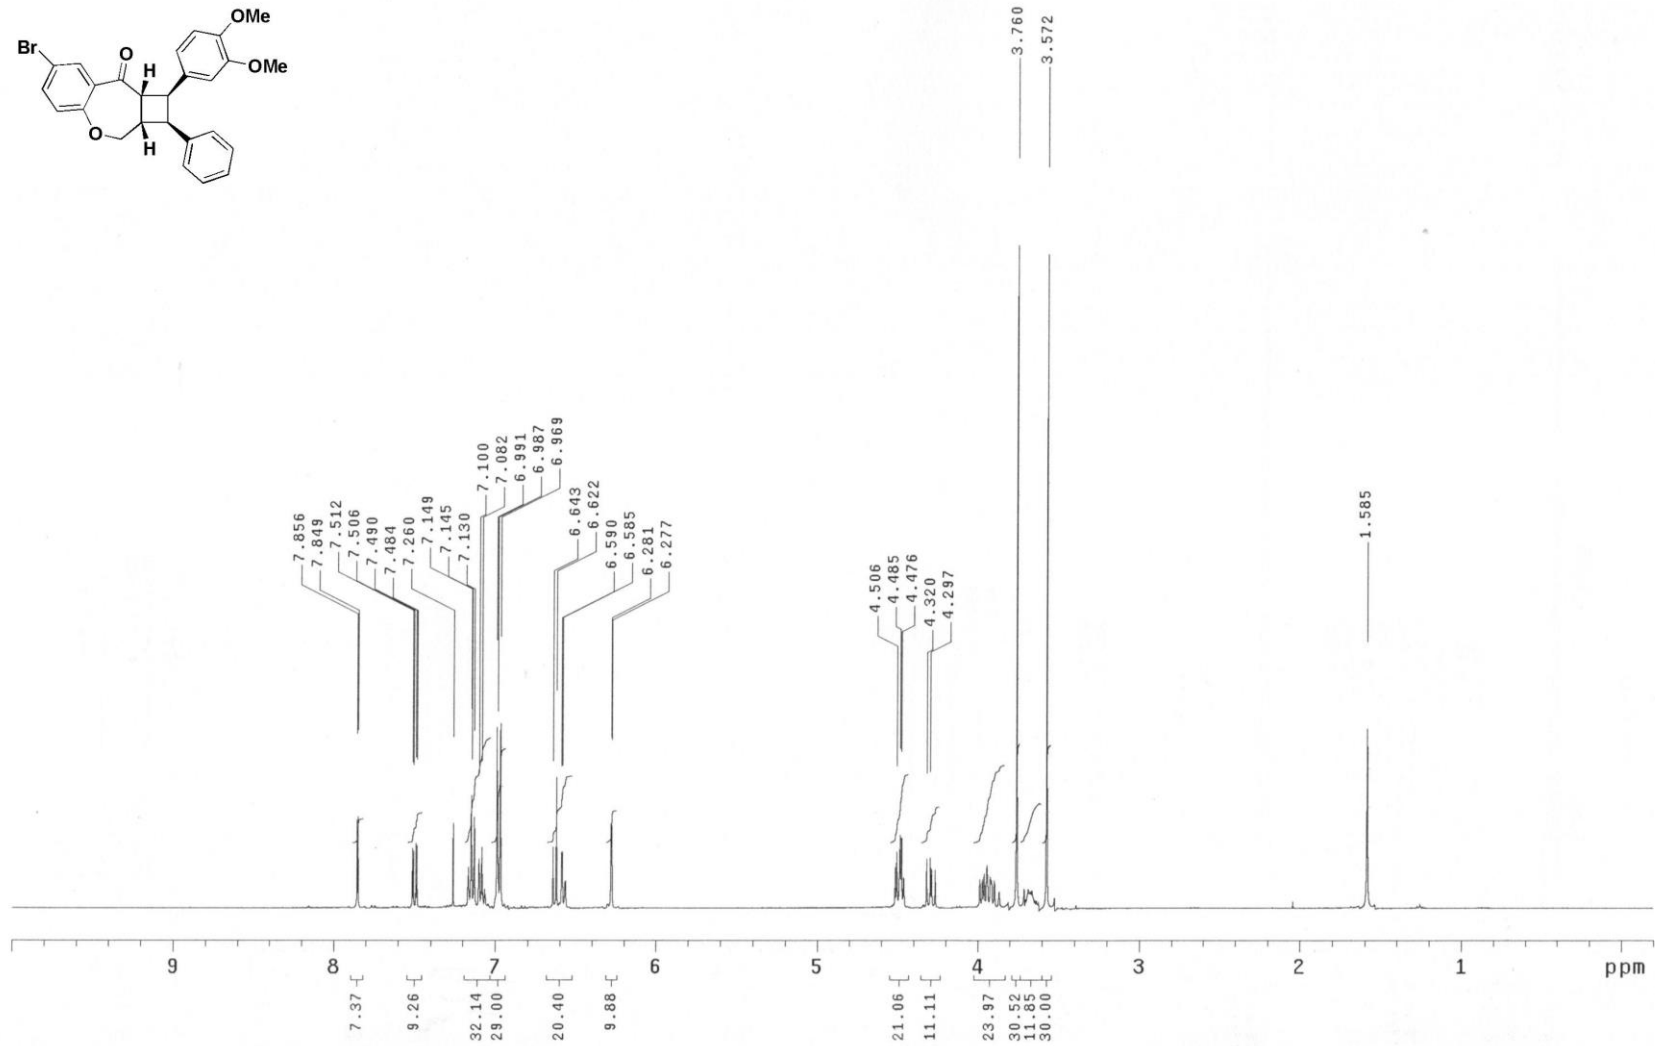

# Compound 6b (<sup>13</sup>C-NMR spectral data)

MC1080322

Pulse Sequence: s2pu1  
UNITYplus-400 "unity400"  
Date: Apr 30 2019  
Solvent: CDCl<sub>3</sub>  
Ambient temperature  
Total 576 repetitions

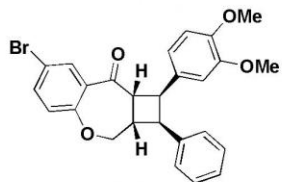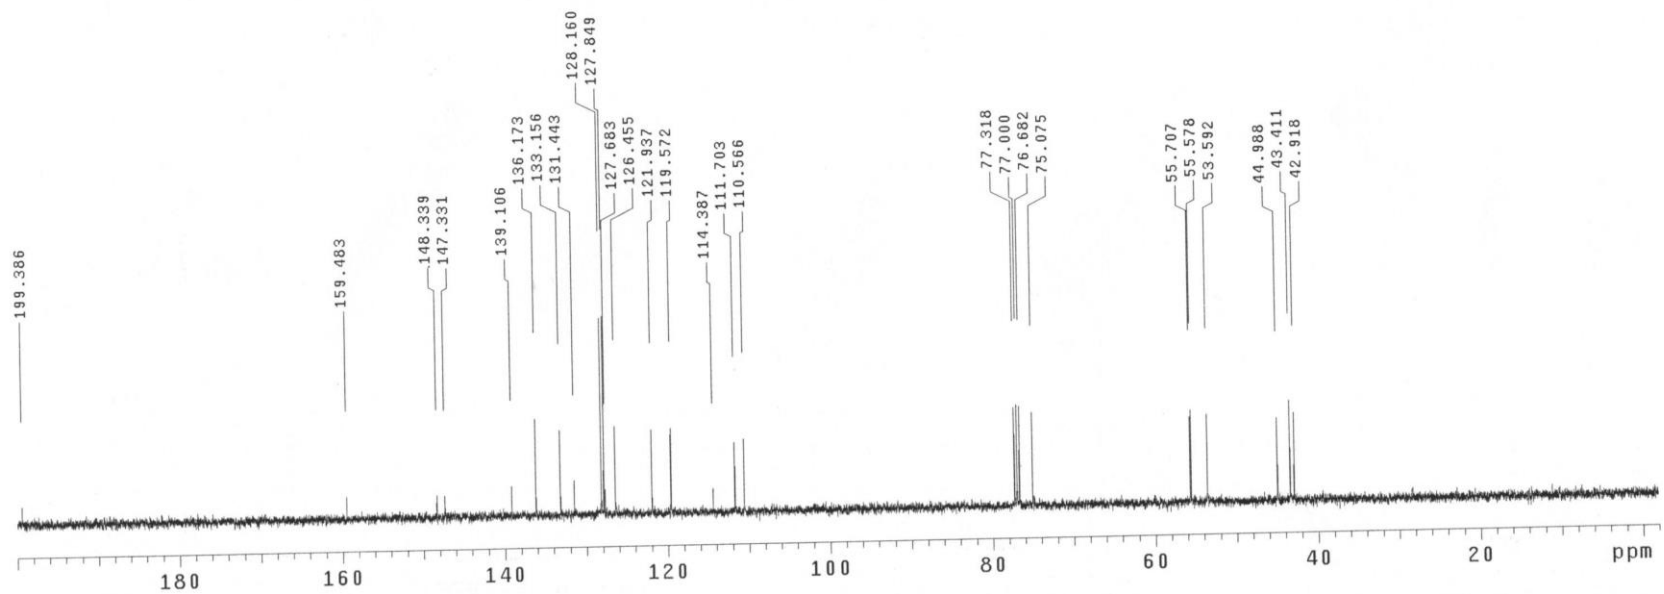

# Compound 6c (<sup>1</sup>H-NMR spectral data)

MC1080613

Pulse Sequence: s2pu1  
UNITYplus-400 "unity400"  
Date: Jun 13 2019  
Solvent: CDCl<sub>3</sub>  
Ambient temperature  
Total 32 repetitions

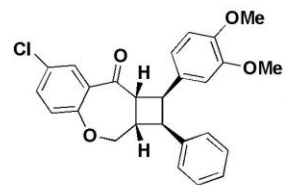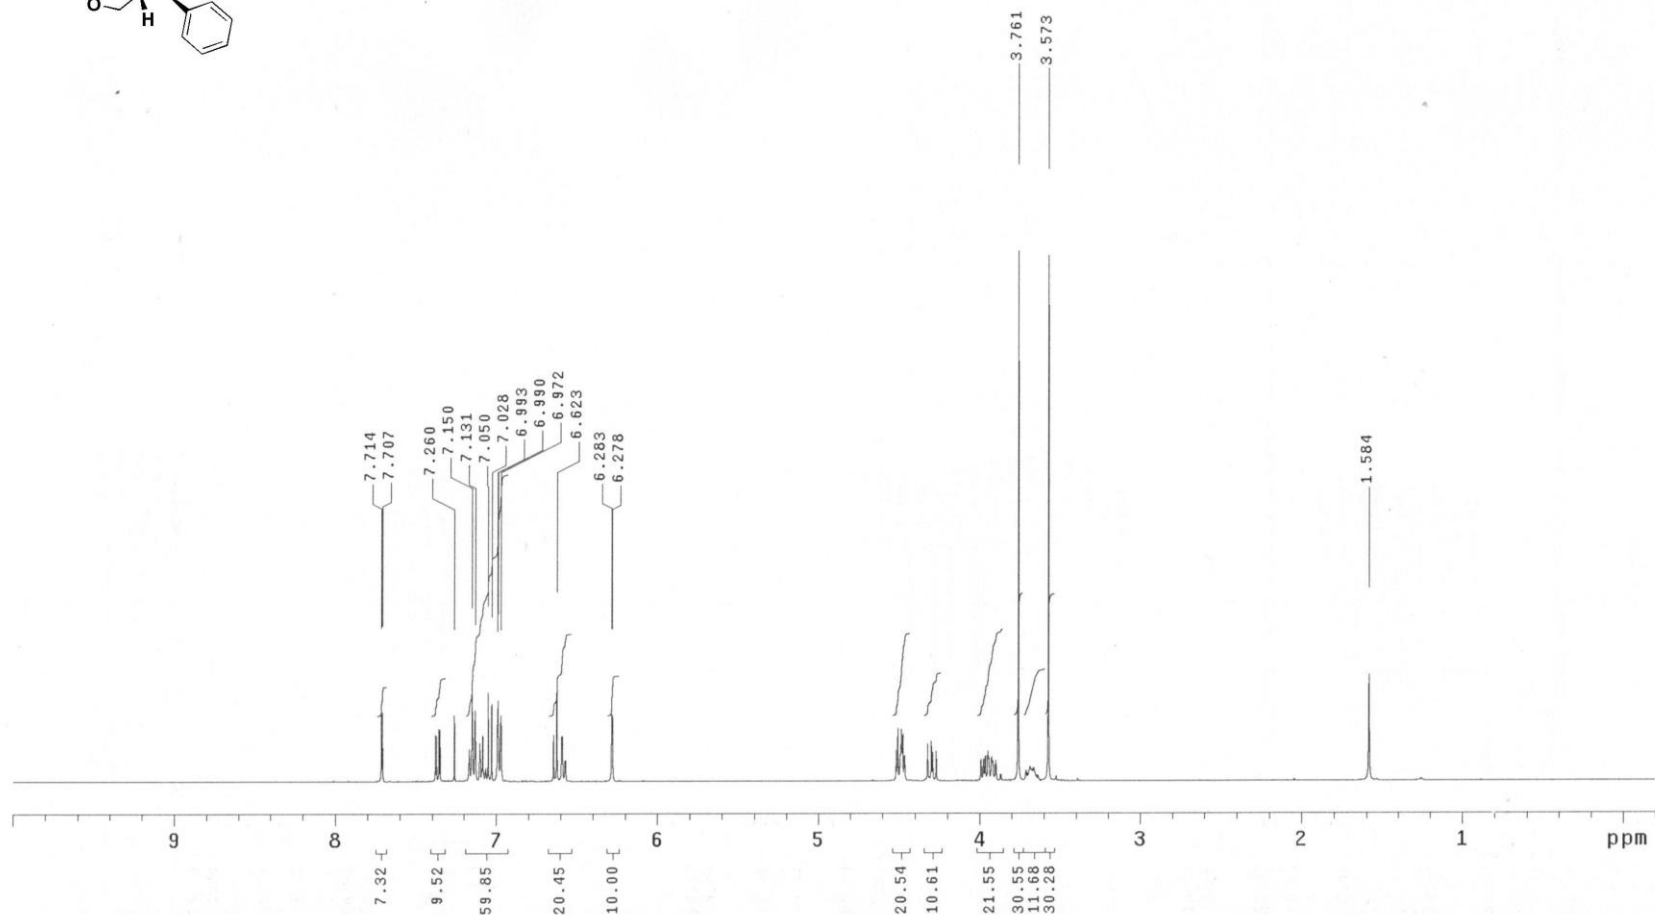

# Compound 6c (<sup>13</sup>C-NMR spectral data)

MC1080613

Pulse Sequence: s2pu1

UNITYplus-400 "unity400"

Date: Jun 13 2019

Solvent: CDCl<sub>3</sub>

Ambient temperature

Total 2528 repetitions

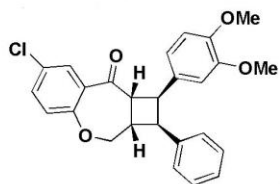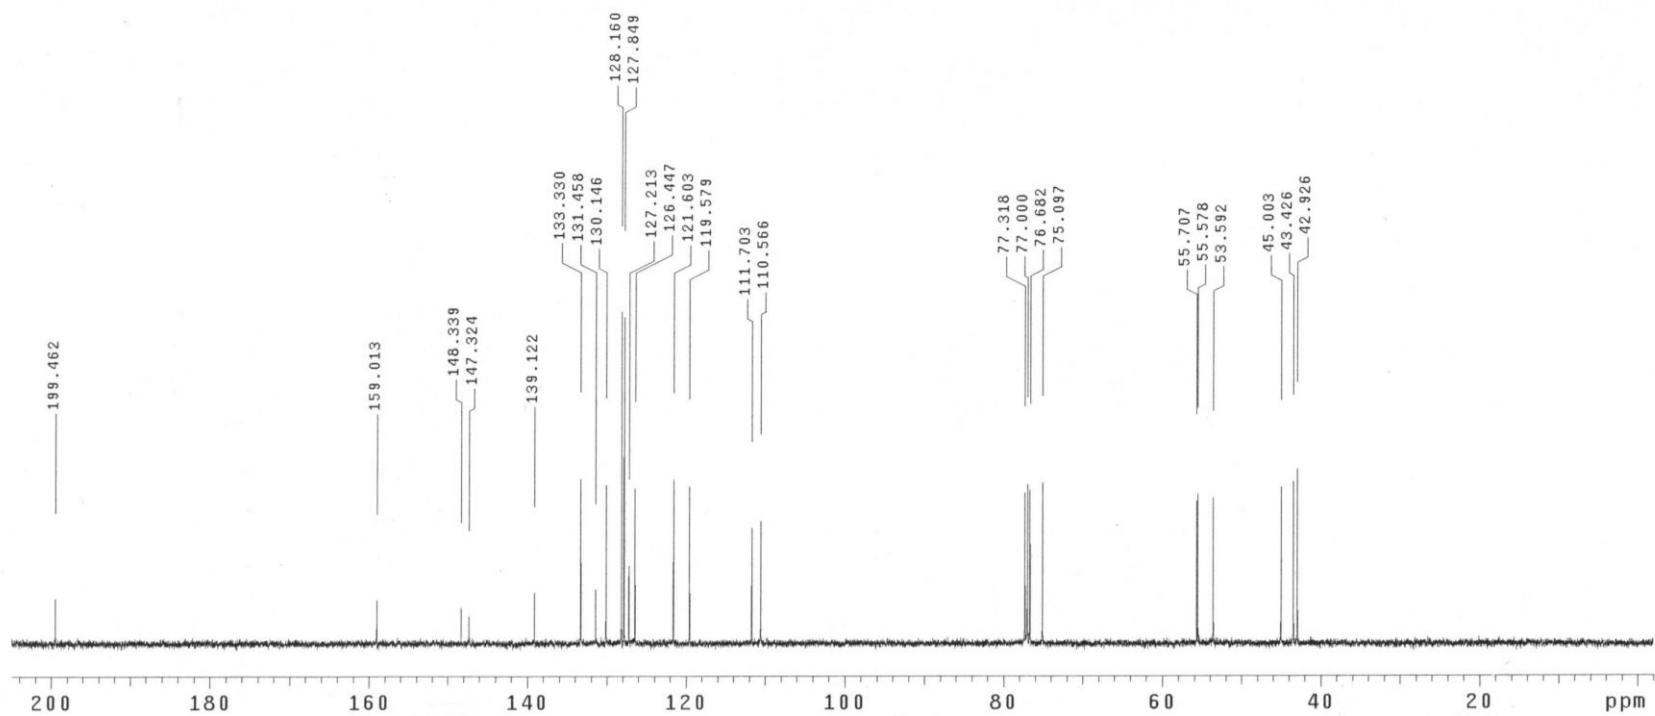

# Compound 6d (<sup>1</sup>H-NMR spectral data)

MC1080403

Pulse Sequence: s2pu1

UNITYplus-400 "unity400"

Date: Apr 8 2019

Solvent: CDCl<sub>3</sub>

Ambient temperature

Total 32 repetitions

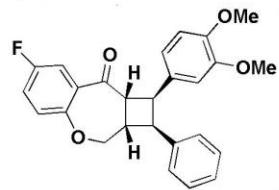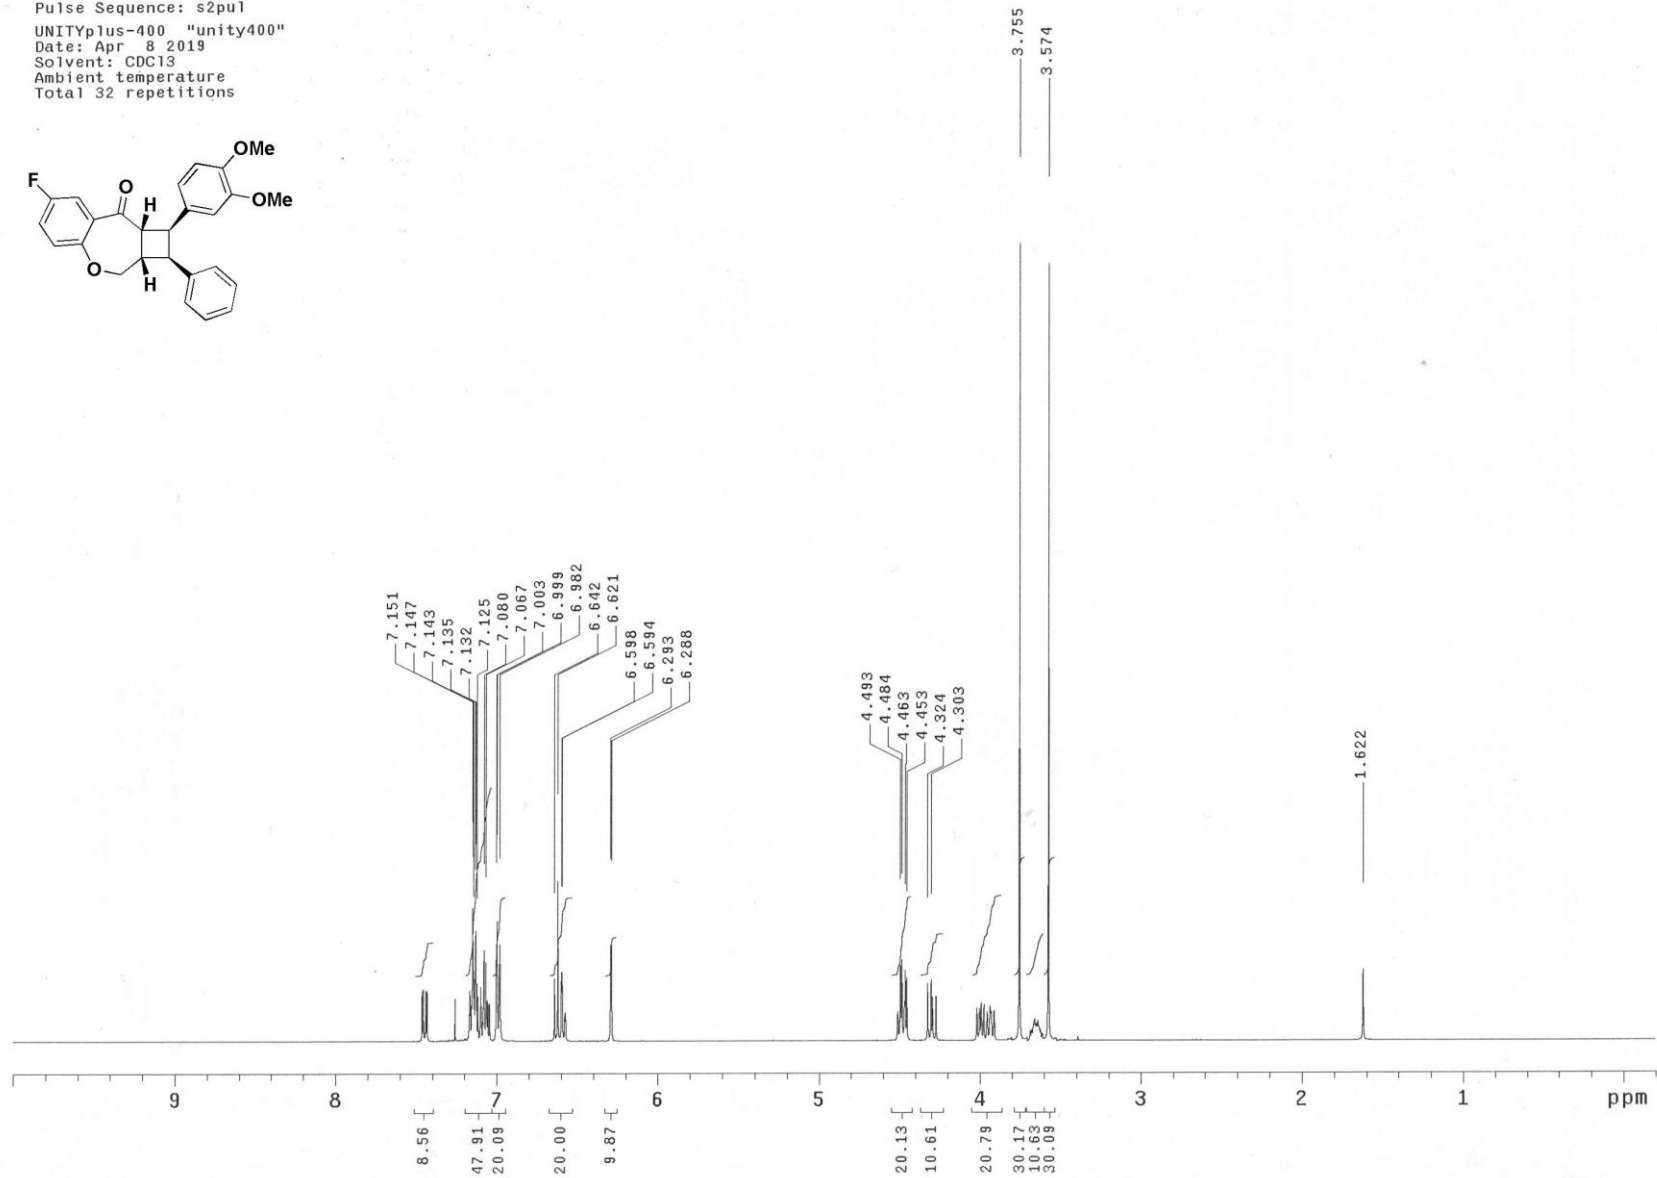



# Compound 6d (<sup>13</sup>C-NMR spectral data)

MC1080403

Pulse Sequence: s2pu1

UNITYplus-400 "unity400"

Date: Apr 8 2019

Solvent: CDCl<sub>3</sub>

Ambient temperature

Total 1408 repetitions

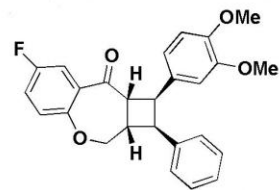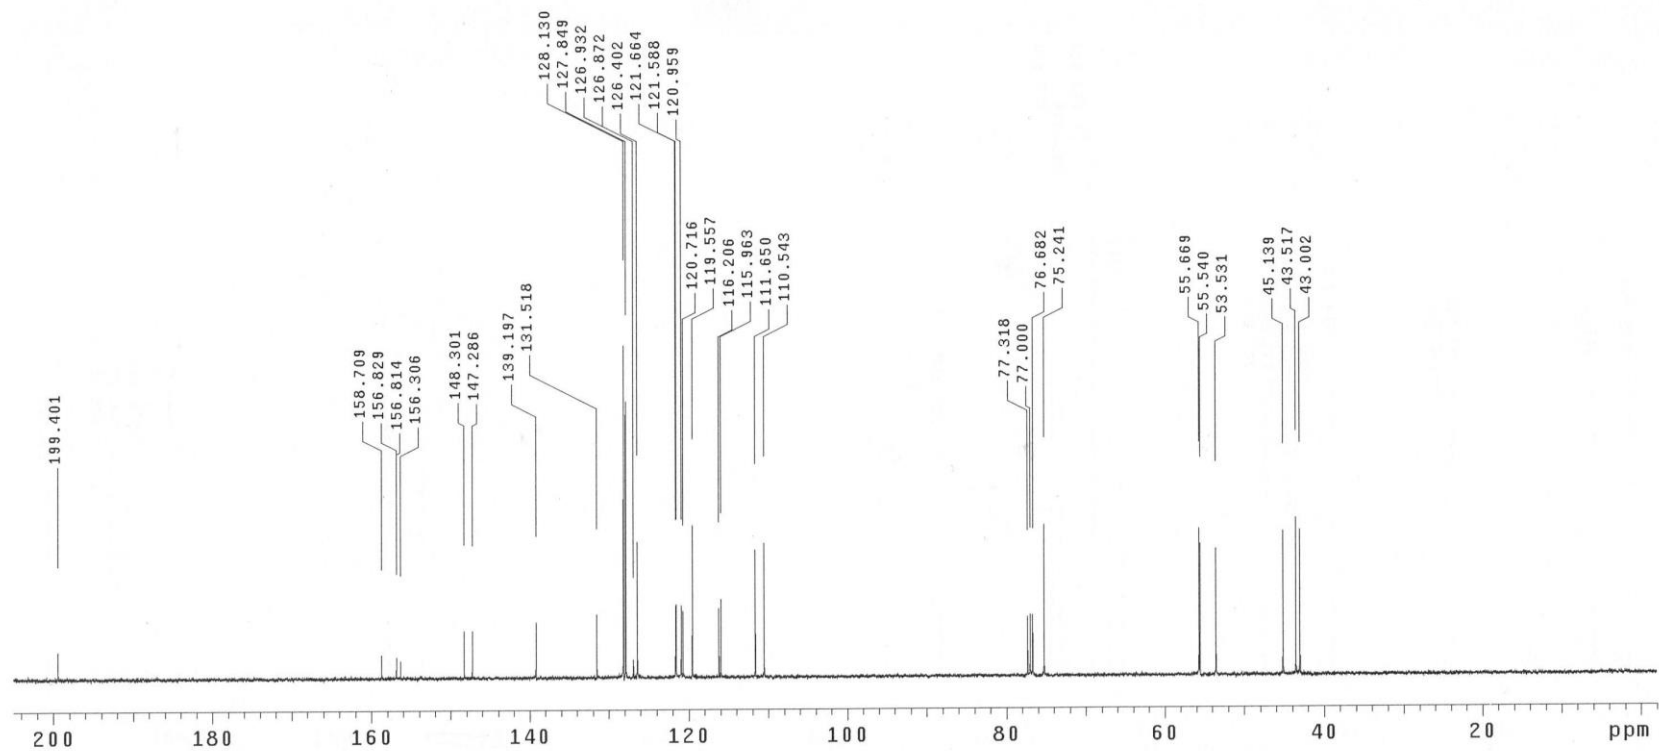

# Compound 6e (<sup>1</sup>H-NMR spectral data)

MC1080319

Pulse Sequence: s2pu1  
UNITYplus-400 "unity400"  
Date: Jun 4 2019  
Solvent: CDCl<sub>3</sub>  
Ambient temperature  
Total 32 repetitions

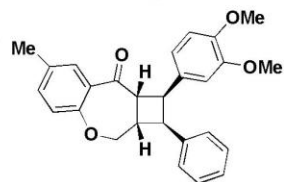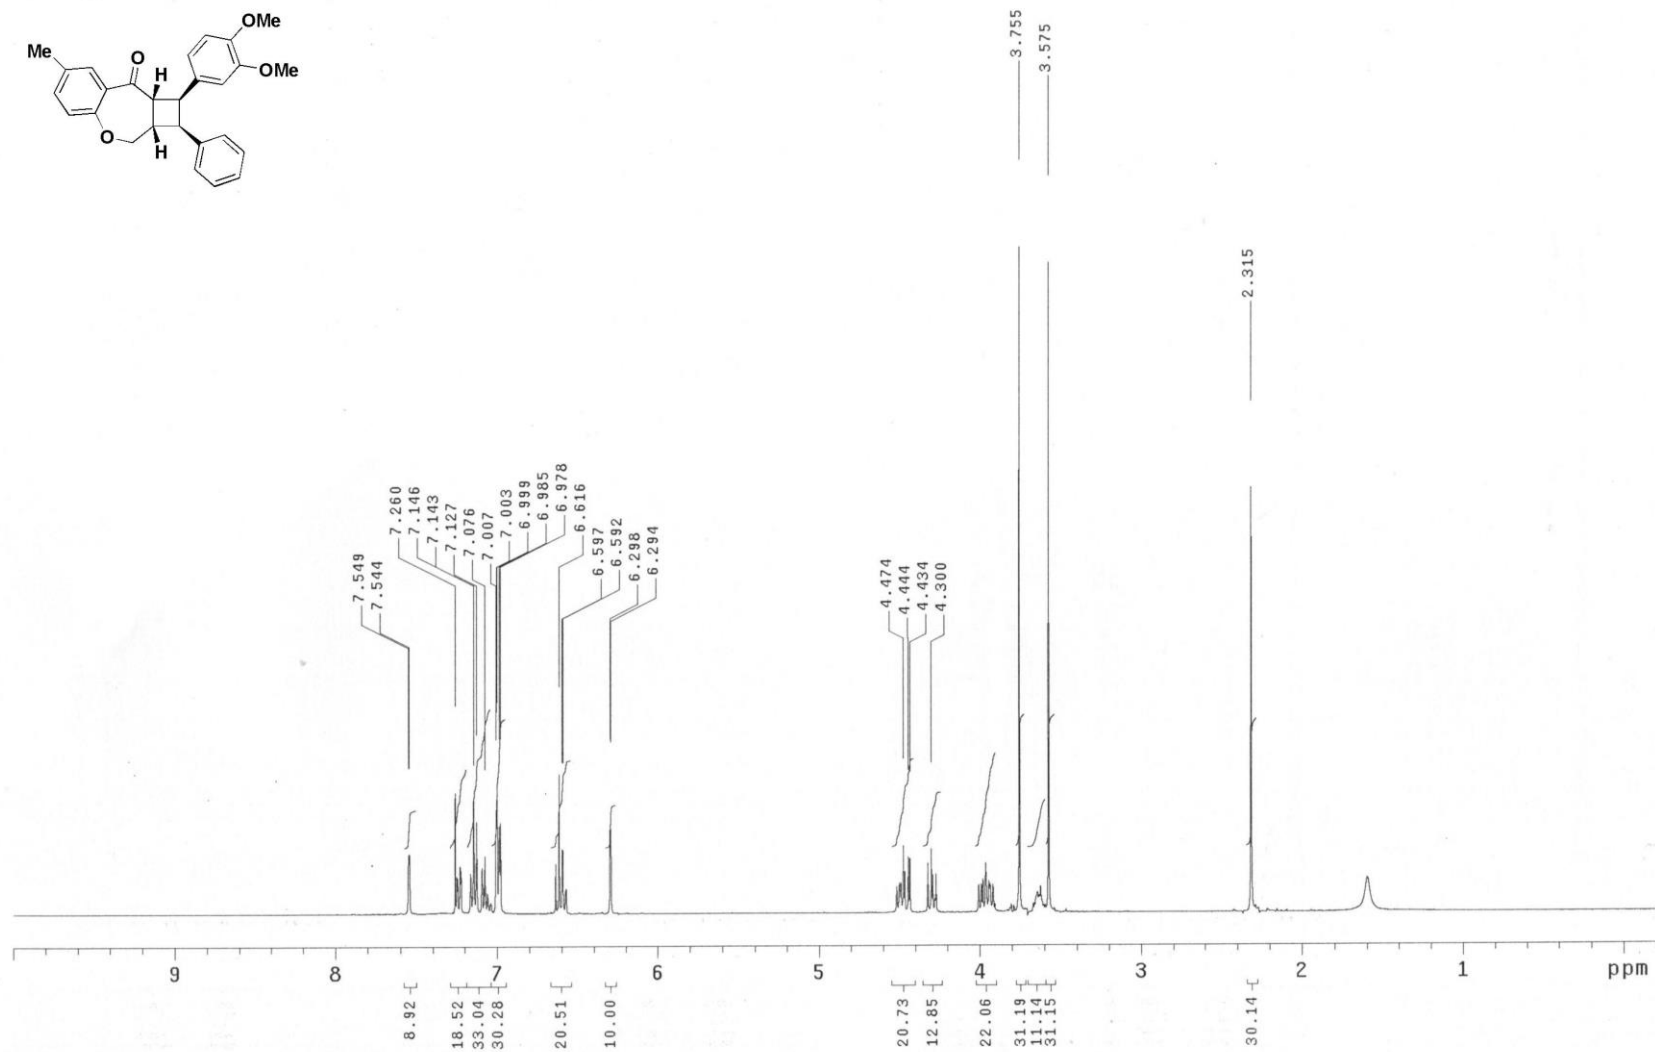

# Compound 6e (<sup>13</sup>C-NMR spectral data)

MC1080319

Pulse Sequence: s2pu1  
UNITYplus-400 "unity400"  
Date: Jun 4 2019  
Solvent: CDC13  
Ambient temperature  
Total 2176 repetitions

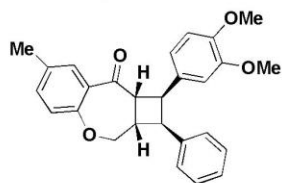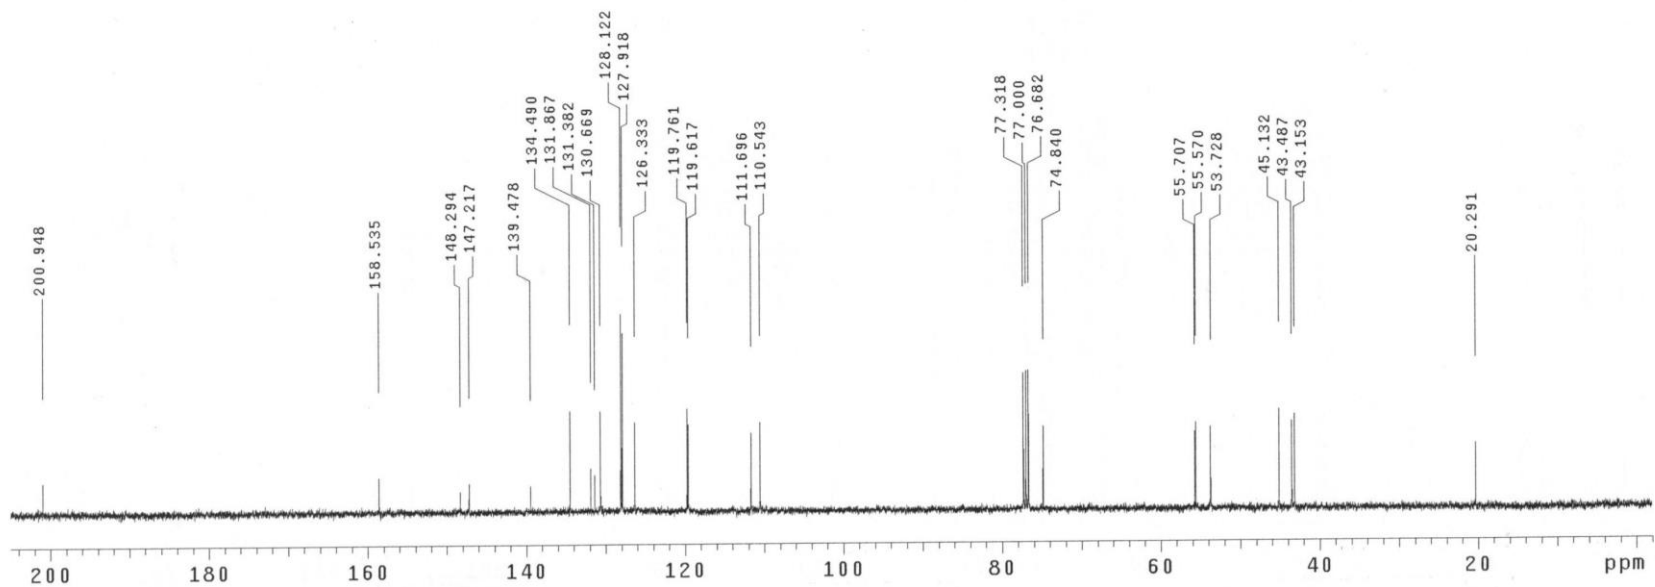

# Compound 6f (<sup>1</sup>H-NMR spectral data)

MC1080314  
Pulse Sequence: s2pu1  
UNITYplus-400 "unity400"  
Date: Apr 29 2019  
Solvent: CDCl3  
Ambient temperature  
Total 32 repetitions

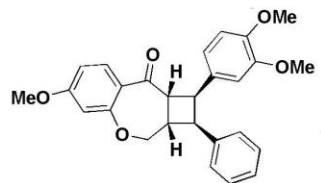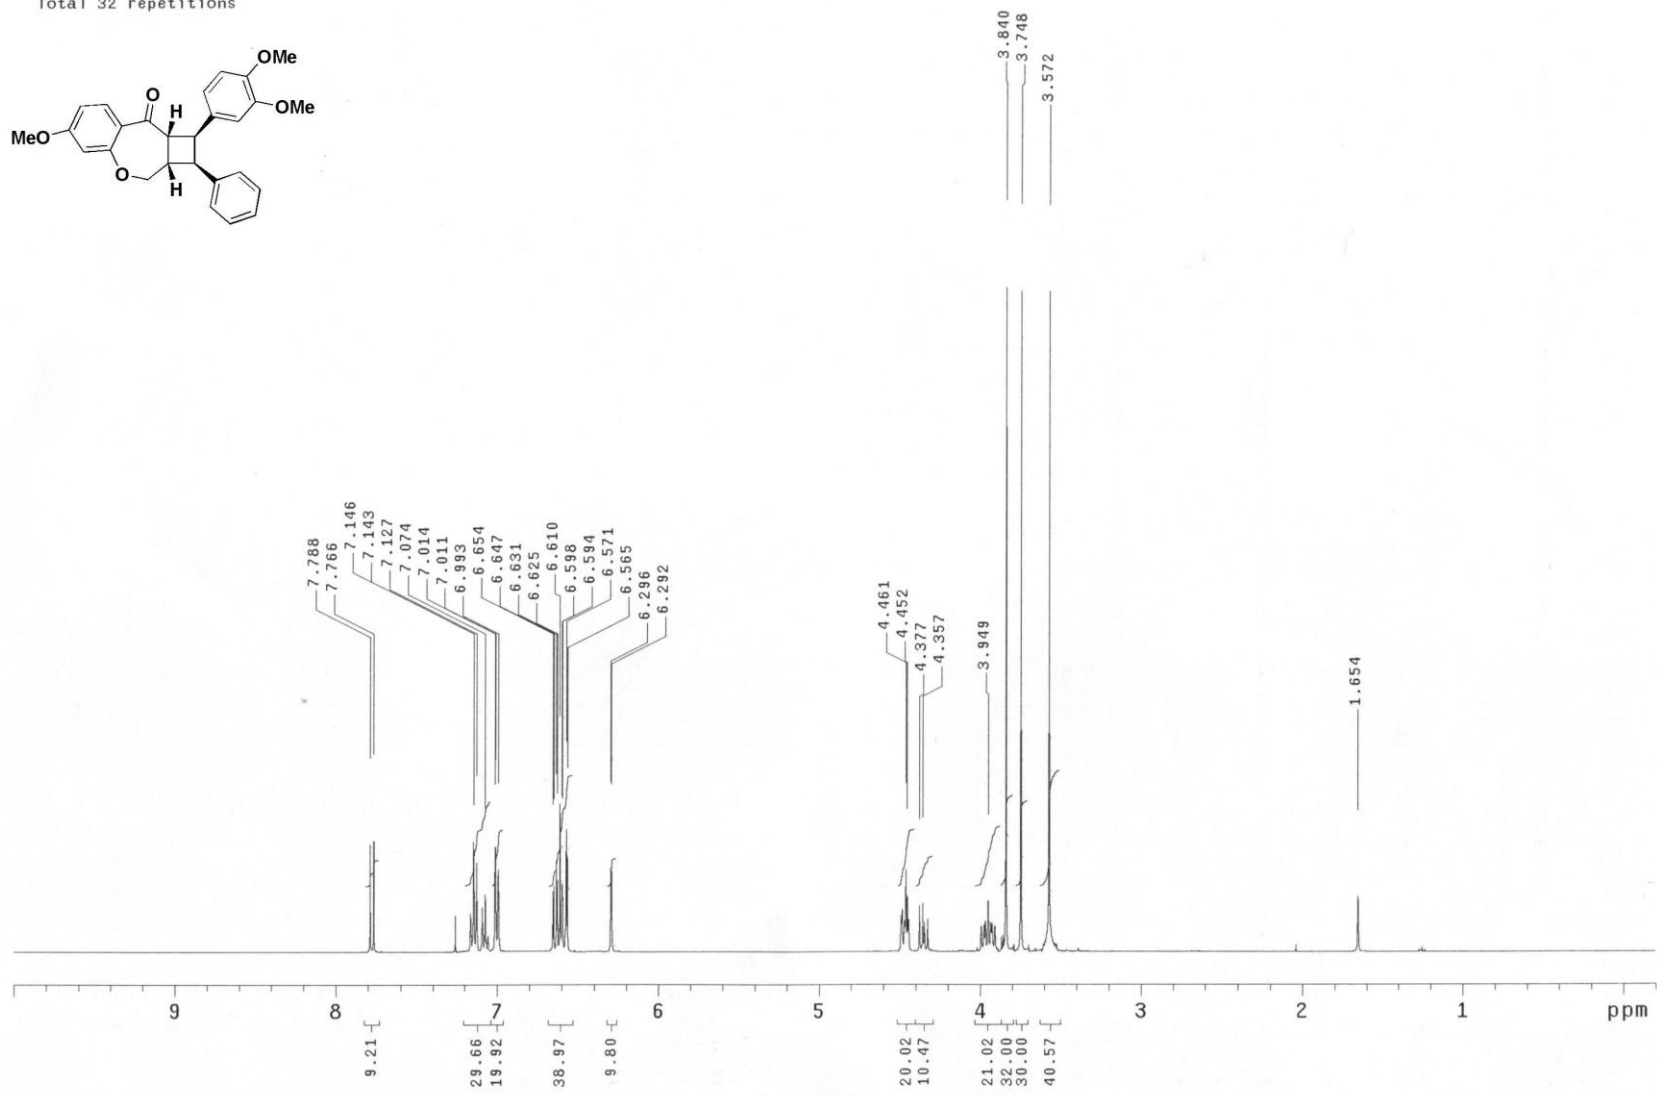

# Compound 6f (<sup>13</sup>C-NMR spectral data)

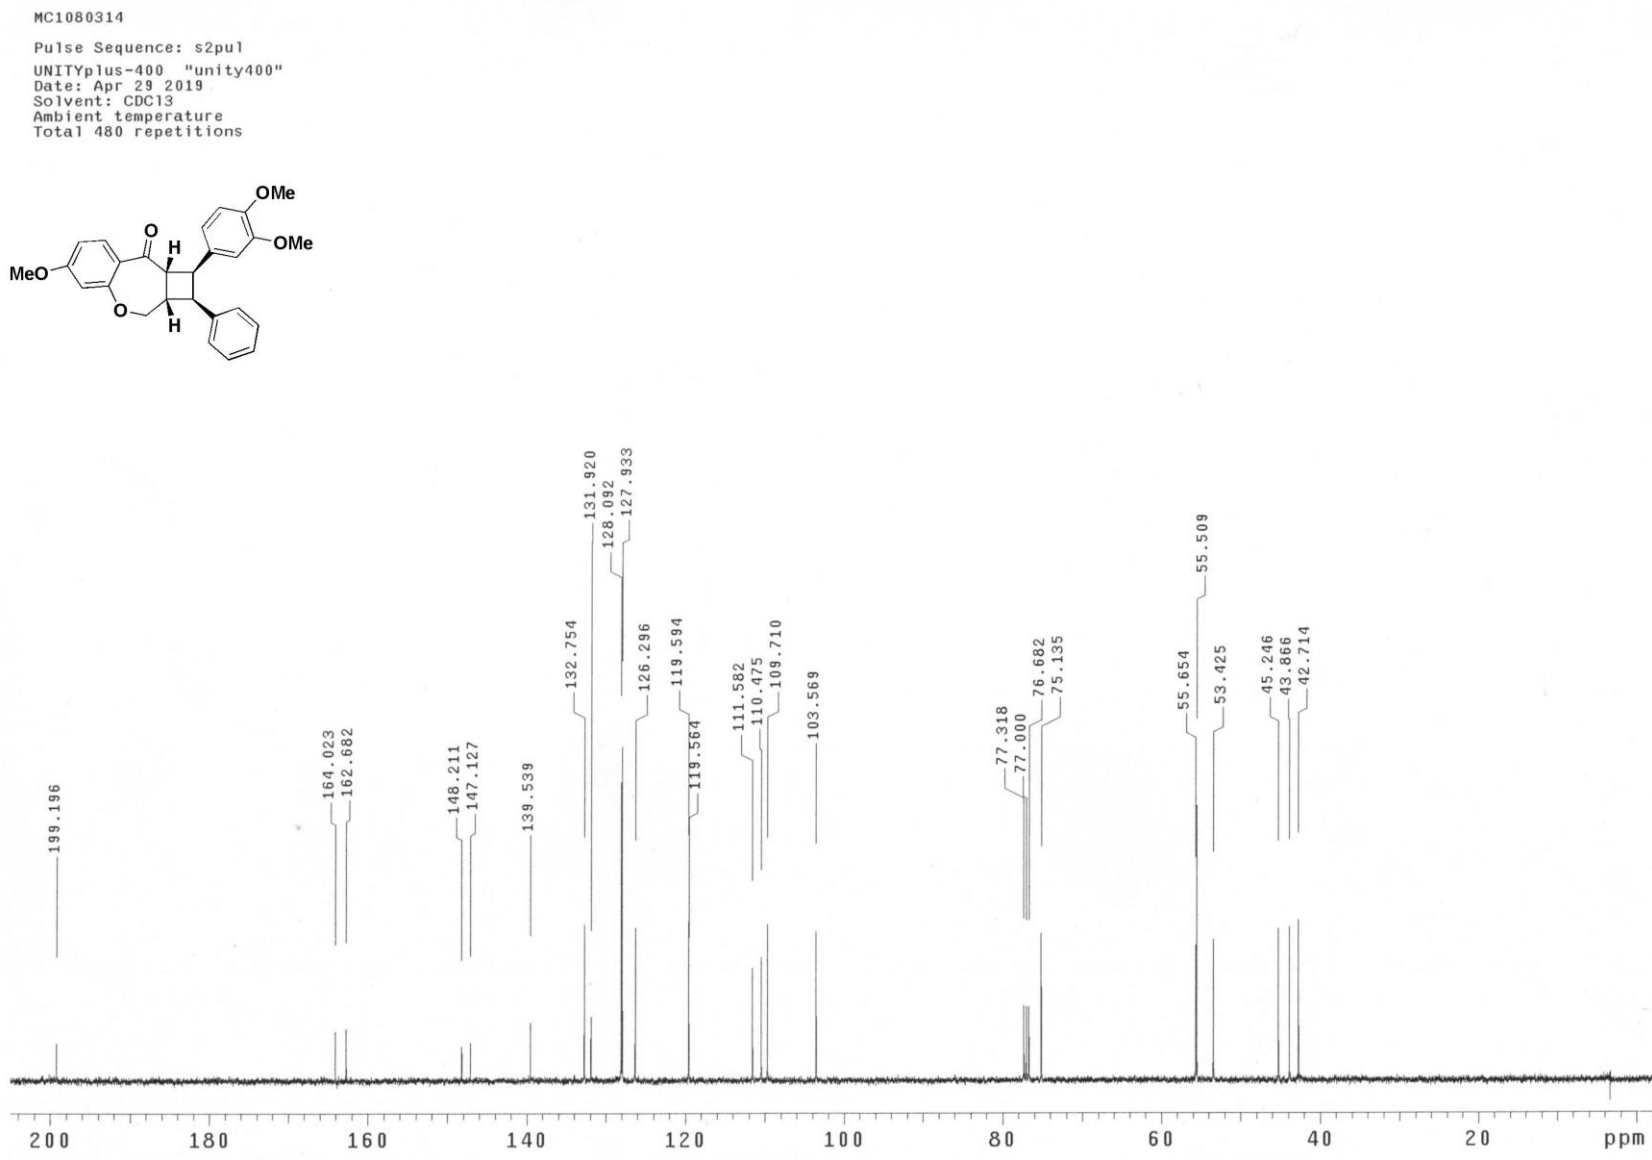

# Compound 6g (<sup>1</sup>H-NMR spectral data)

MC1080513

Pulse Sequence: s2pu1

UNITYplus-400 "unity400"

Date: May 15 2019

Solvent: CDC13

Ambient temperature

Total 32 repetitions

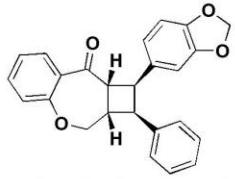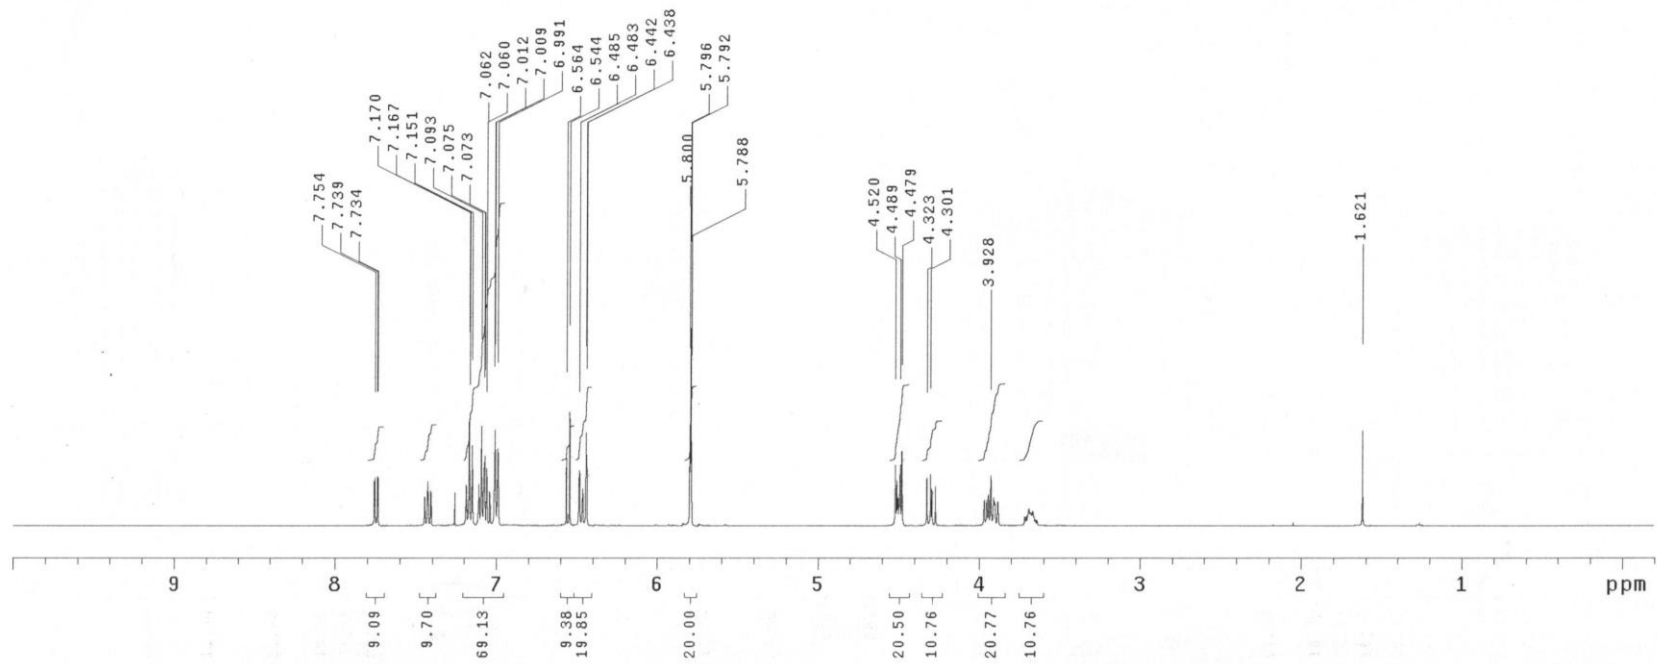

# Compound 6g (<sup>13</sup>C-NMR spectral data)

MC1080513

Pulse Sequence: s2pu1  
UNITYplus-400 "unity400"  
Date: May 15 2019  
Solvent: CDCl<sub>3</sub>  
Ambient temperature  
Total 720 repetitions

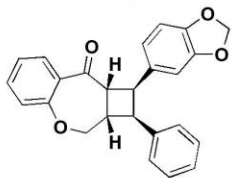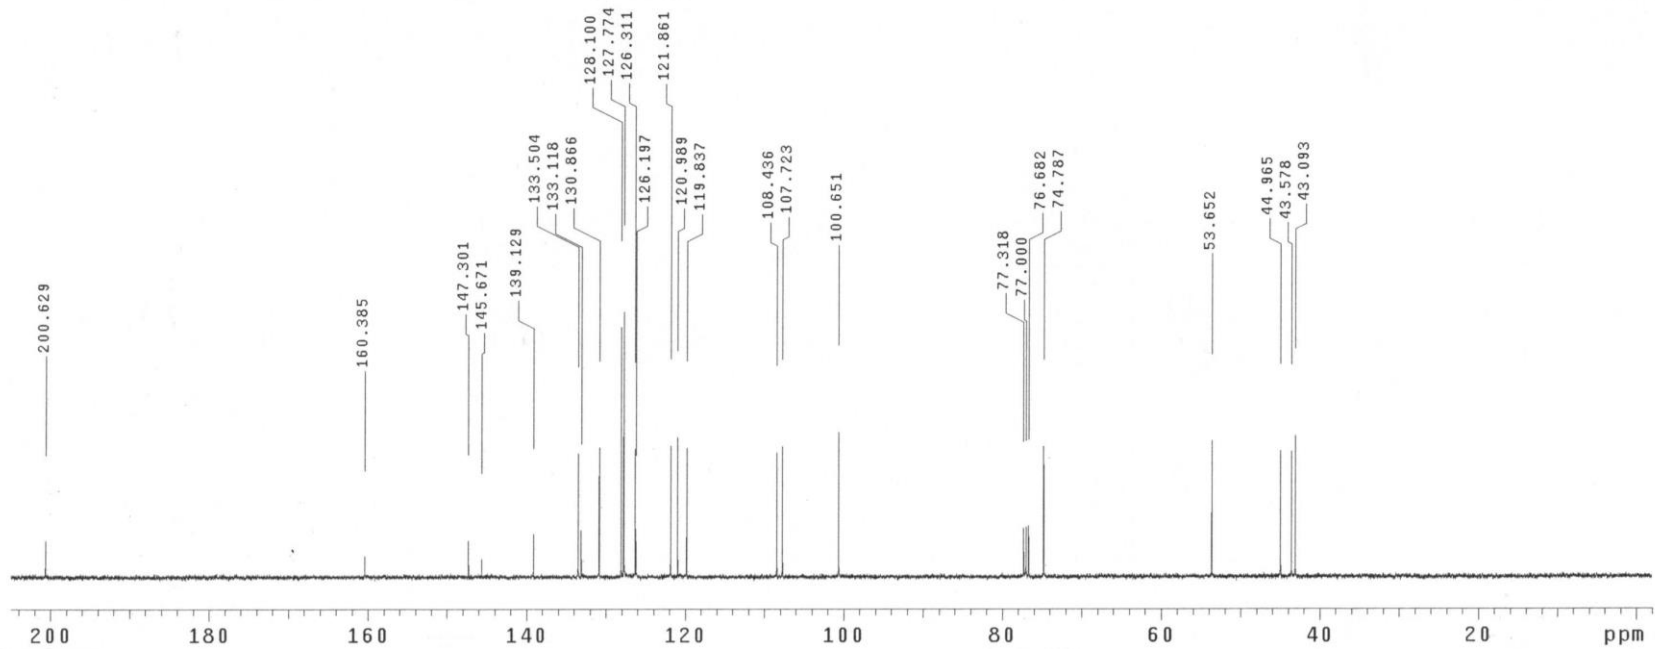

# Compound 6h (<sup>1</sup>H-NMR spectral data)

MC1080426

Pulse Sequence: s2pu1

UNITYplus-400 "unity400"

Date: Jun 28 2019

Solvent: CDCl<sub>3</sub>

Ambient temperature

Total 32 repetitions

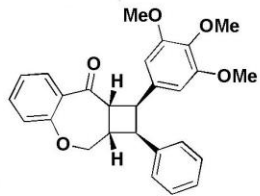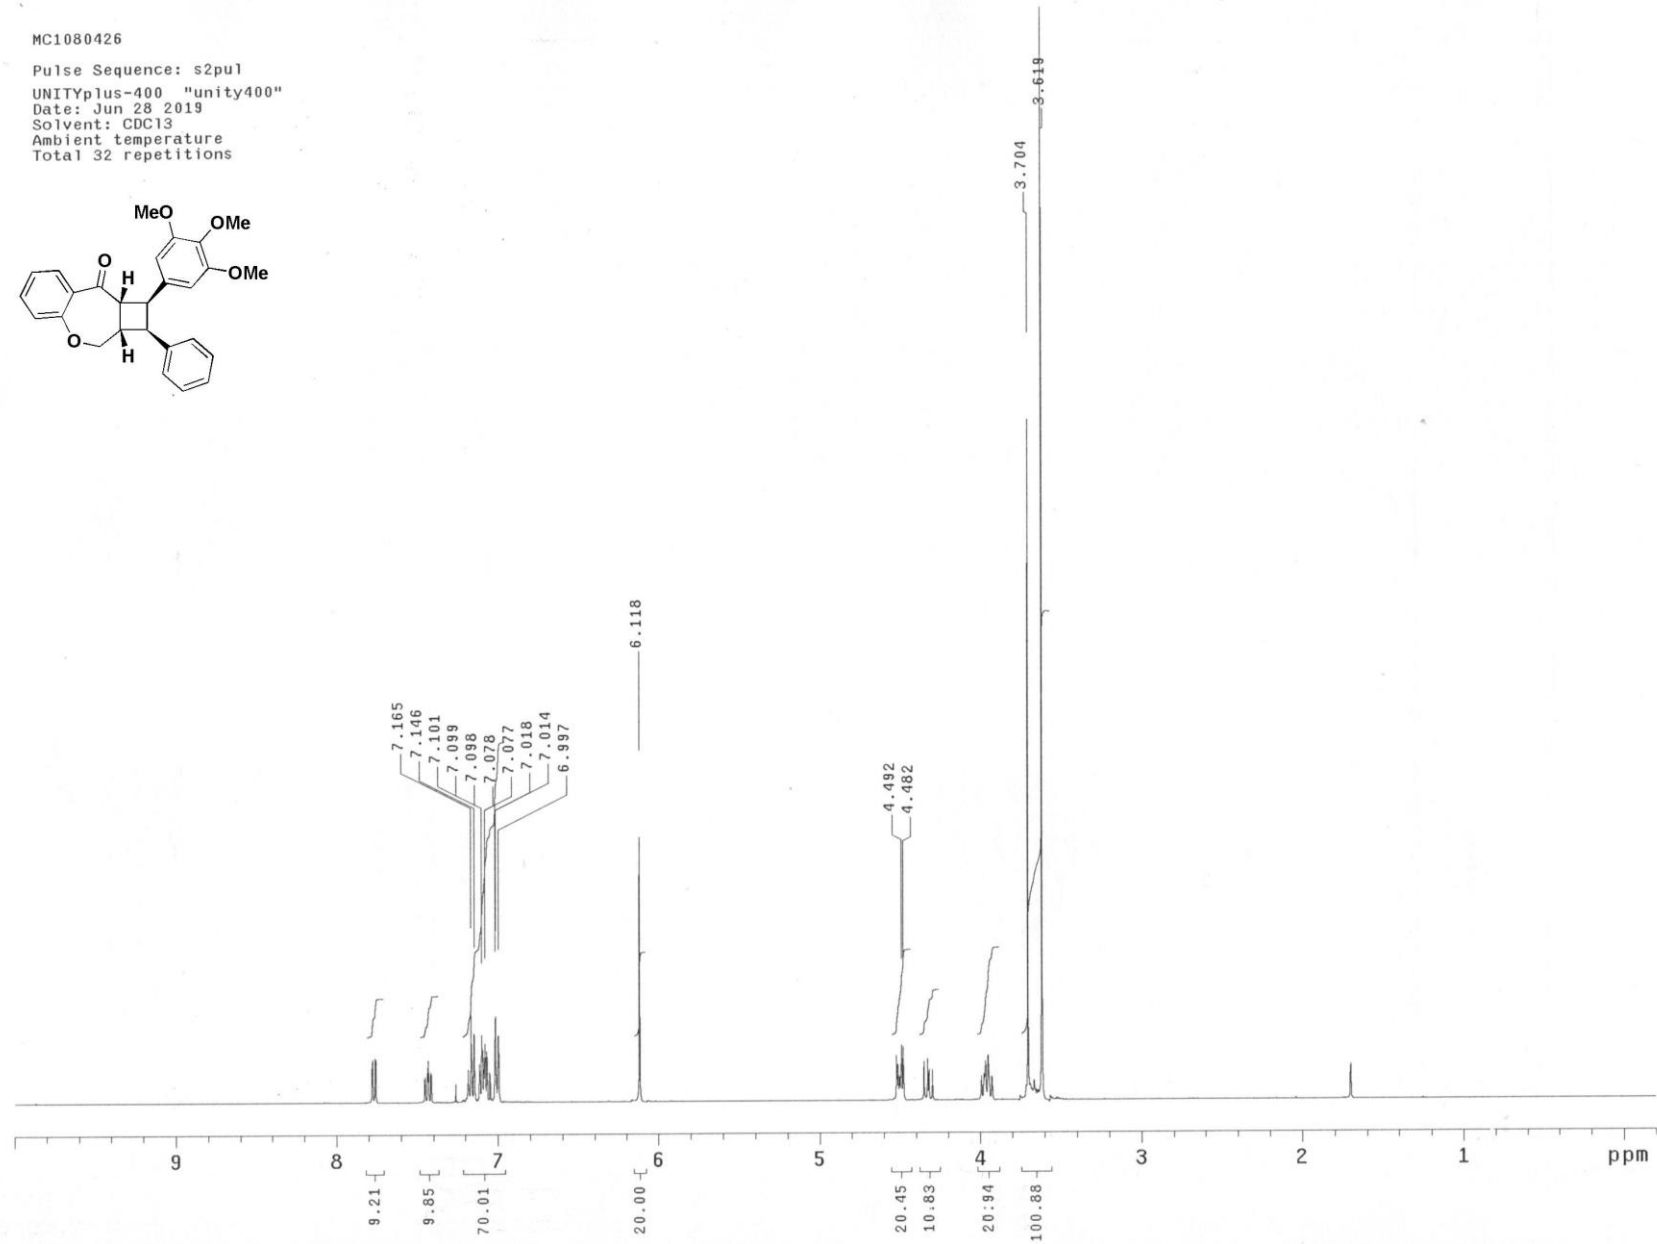



# Compound 6h (<sup>13</sup>C-NMR spectral data)

MC1080426

Pulse Sequence: s2pu1  
UNITYplus-400 "unity400"  
Date: Jun 28 2019  
Solvent: CDCl<sub>3</sub>  
Ambient temperature  
Total 176 repetitions

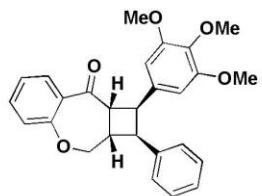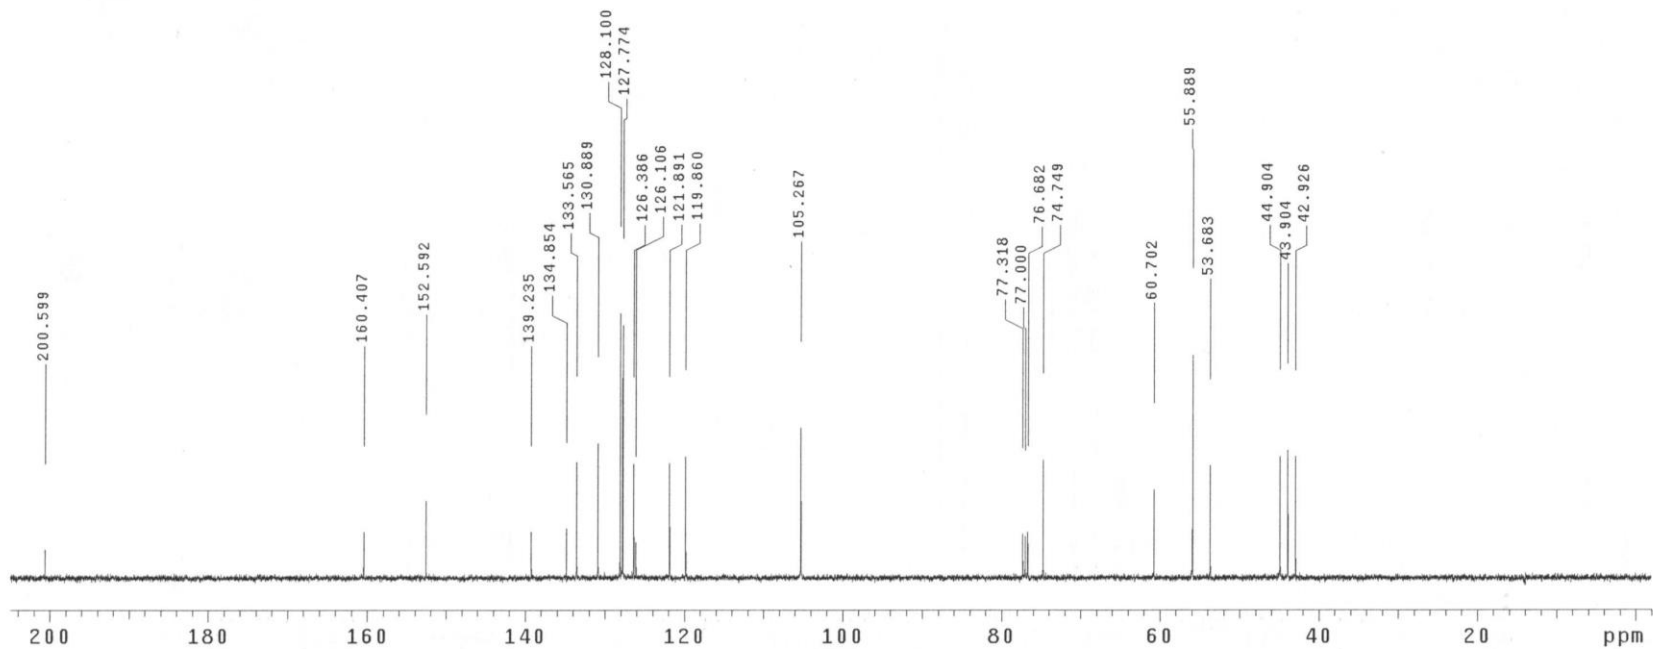

# Compound 6i (<sup>1</sup>H-NMR spectral data)

MC1080627

Pulse Sequence: s2pu1  
UNITYplus-400 "unity400"  
Date: Jun 27 2019  
Solvent: CDCl<sub>3</sub>  
Ambient temperature  
Total 32 repetitions

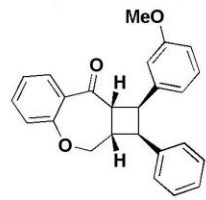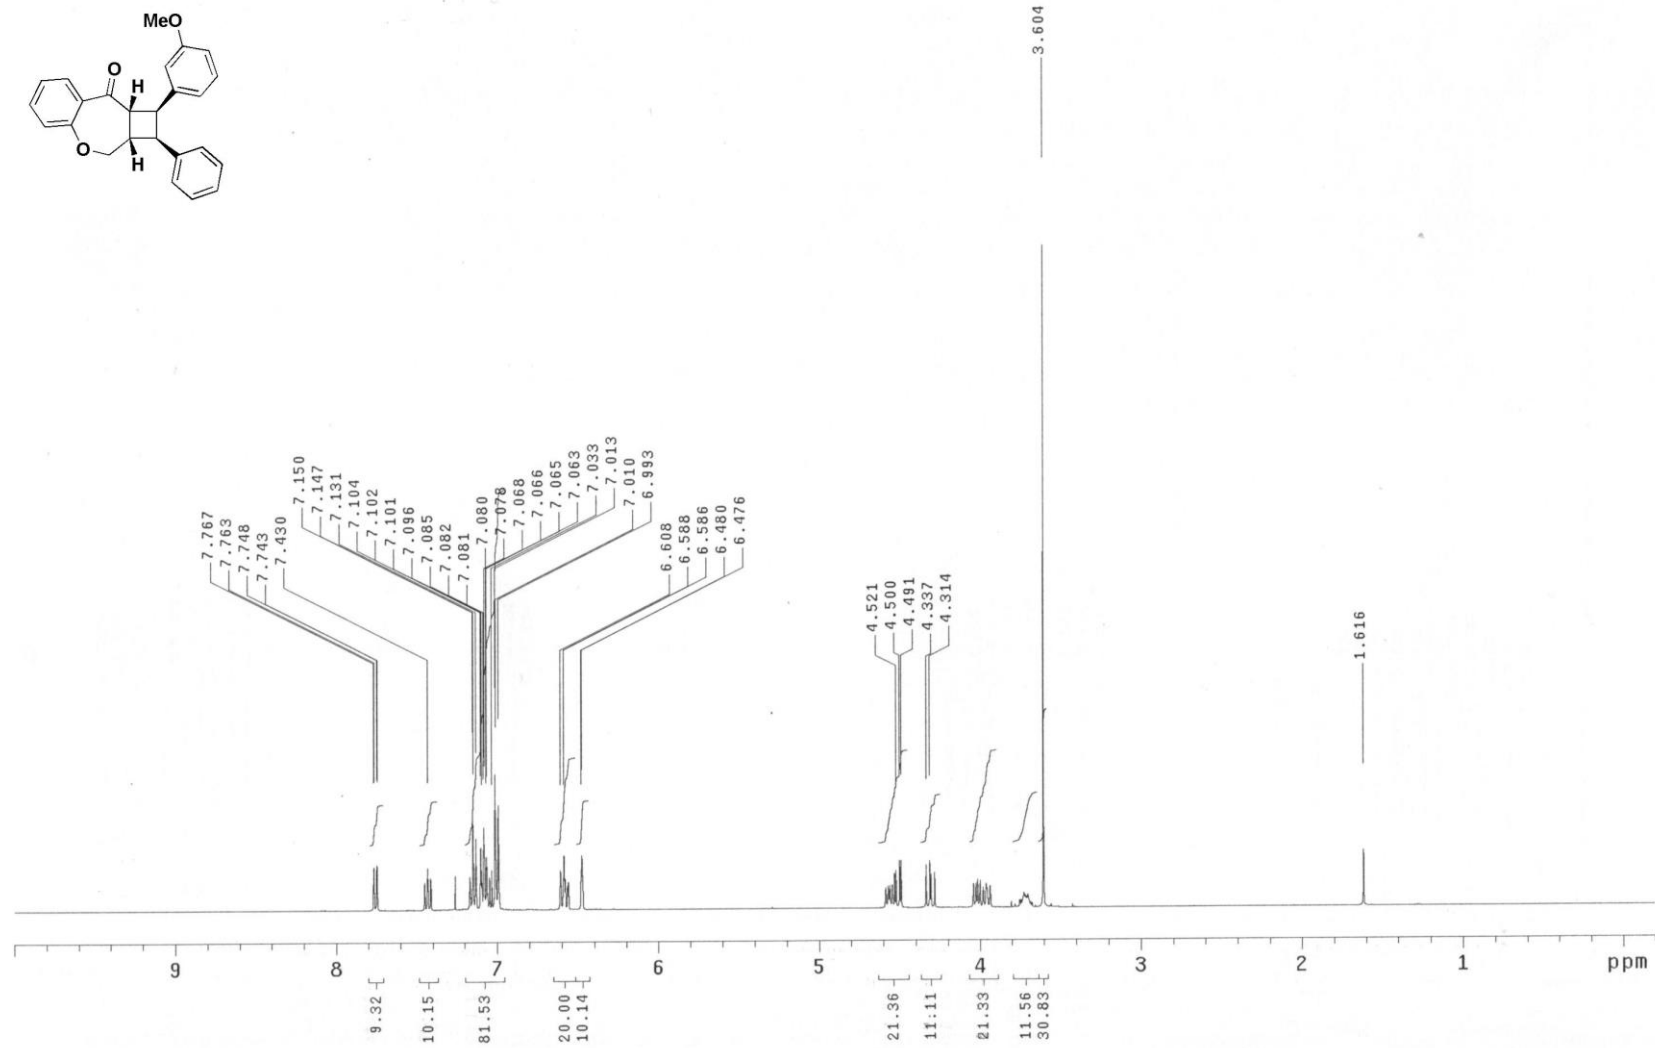

# Compound 6i (<sup>13</sup>C-NMR spectral data)

MC1080627

Pulse Sequence: s2pu1

UNITYplus-400 "unity400"

Date: Jun 27 2019

Solvent: CDCl<sub>3</sub>

Ambient temperature

Total 528 repetitions

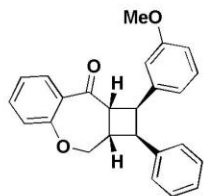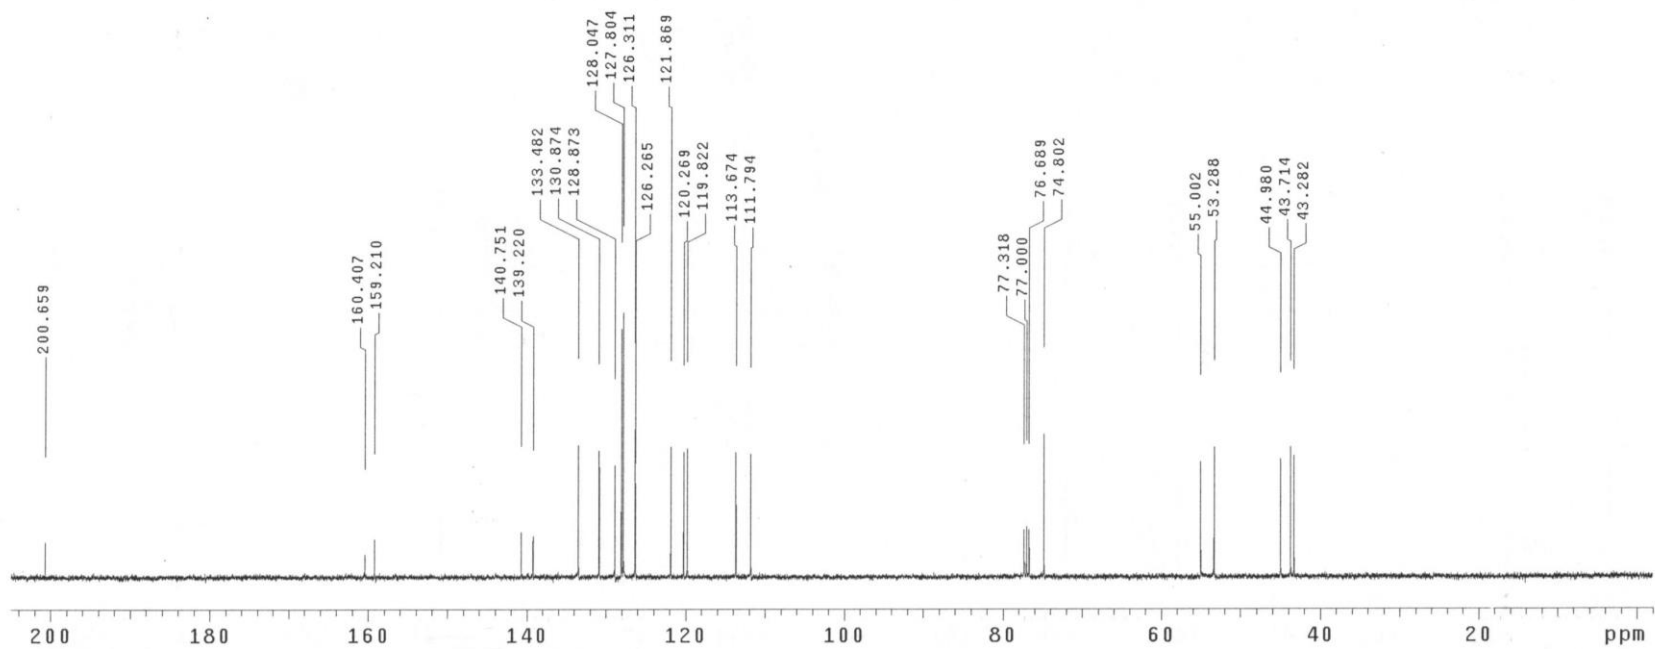

# Compound 6j (<sup>1</sup>H-NMR spectral data)

MC1080629

Pulse Sequence: s2pu1  
UNITYplus-400 "unity400"  
Date: Jun 27 2019  
Solvent: CDCl<sub>3</sub>  
Ambient temperature  
Total 32 repetitions

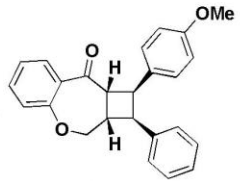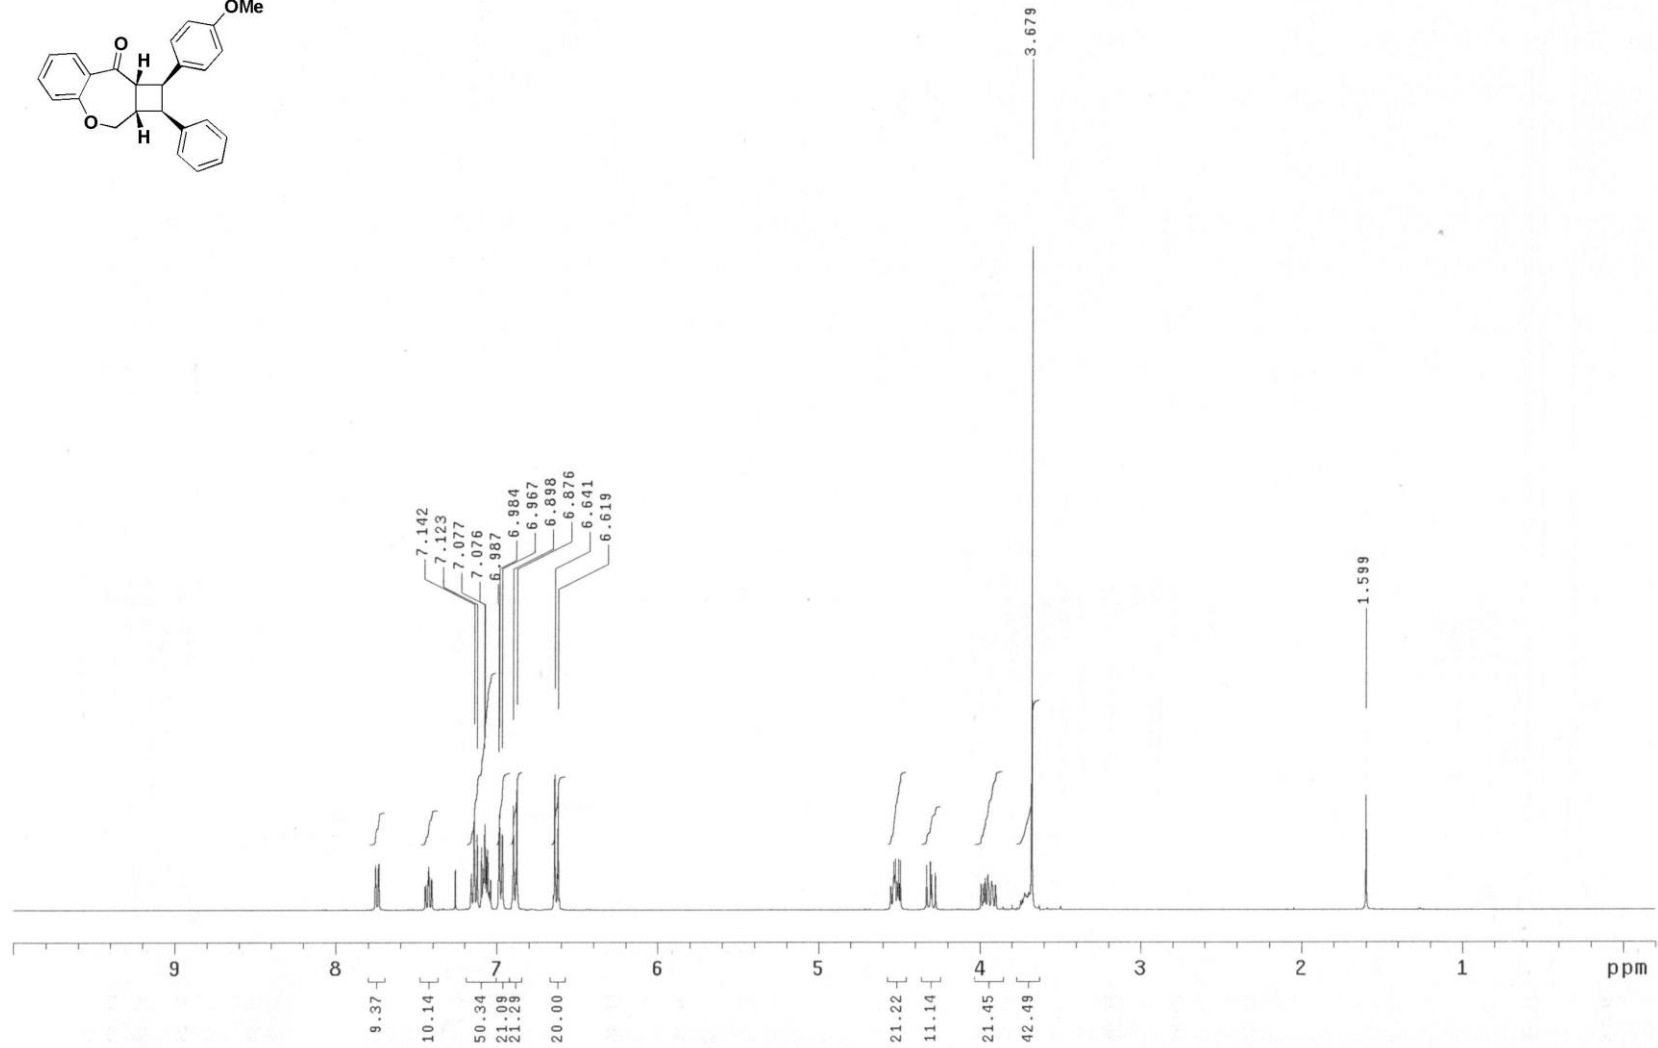

# Compound 6j (<sup>13</sup>C-NMR spectral data)

MC1080629

Pulse Sequence: s2pu1  
UNITYplus-400 "unity400"  
Date: Jun 27 2019  
Solvent: CDC13  
Ambient temperature  
Total 1120 repetitions

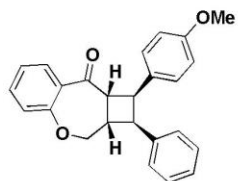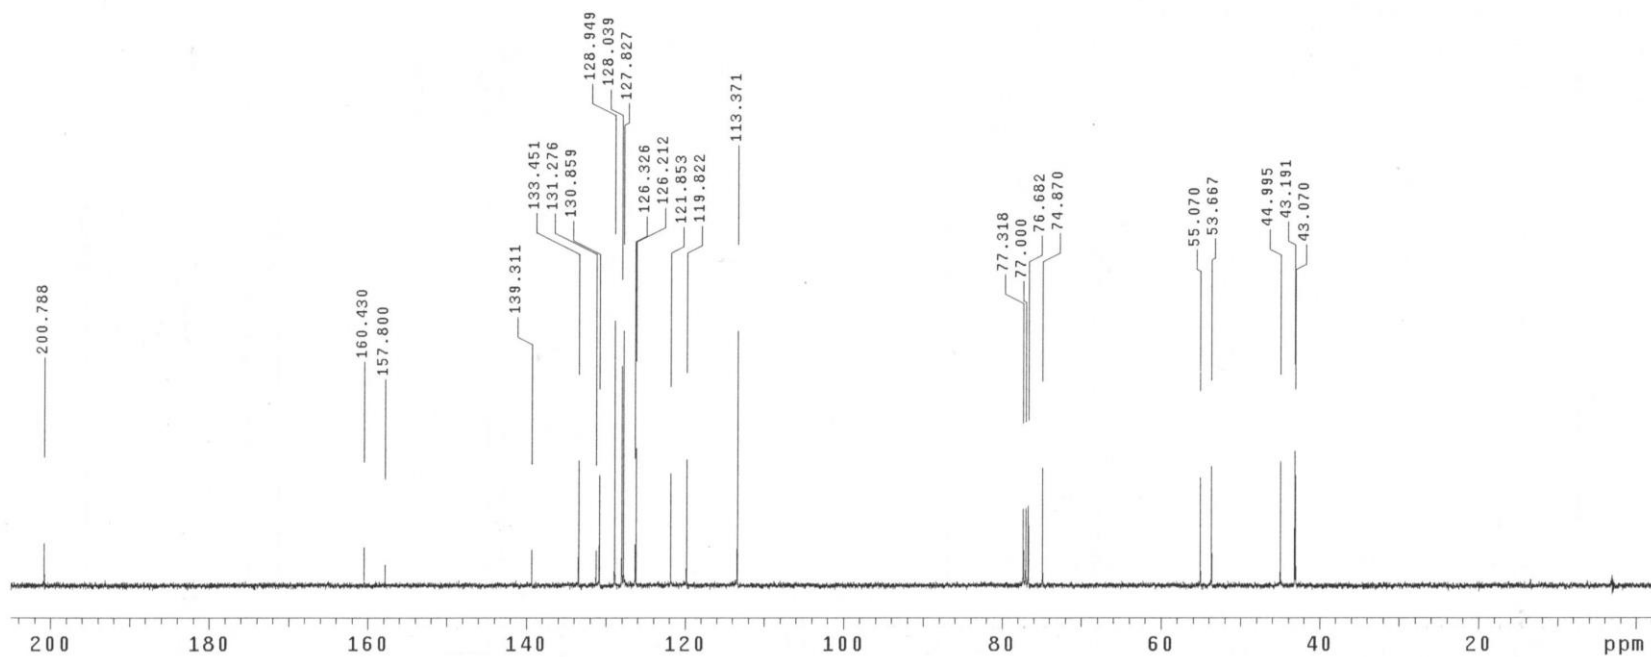

# Compound 6k (<sup>1</sup>H-NMR spectral data)

MC1080616

Pulse Sequence: s2pu1  
UNITYplus-400 "unity400"  
Date: Jun 17 2019  
Solvent: CDCl<sub>3</sub>  
Ambient temperature  
Total 32 repetitions

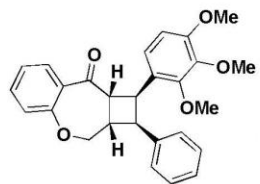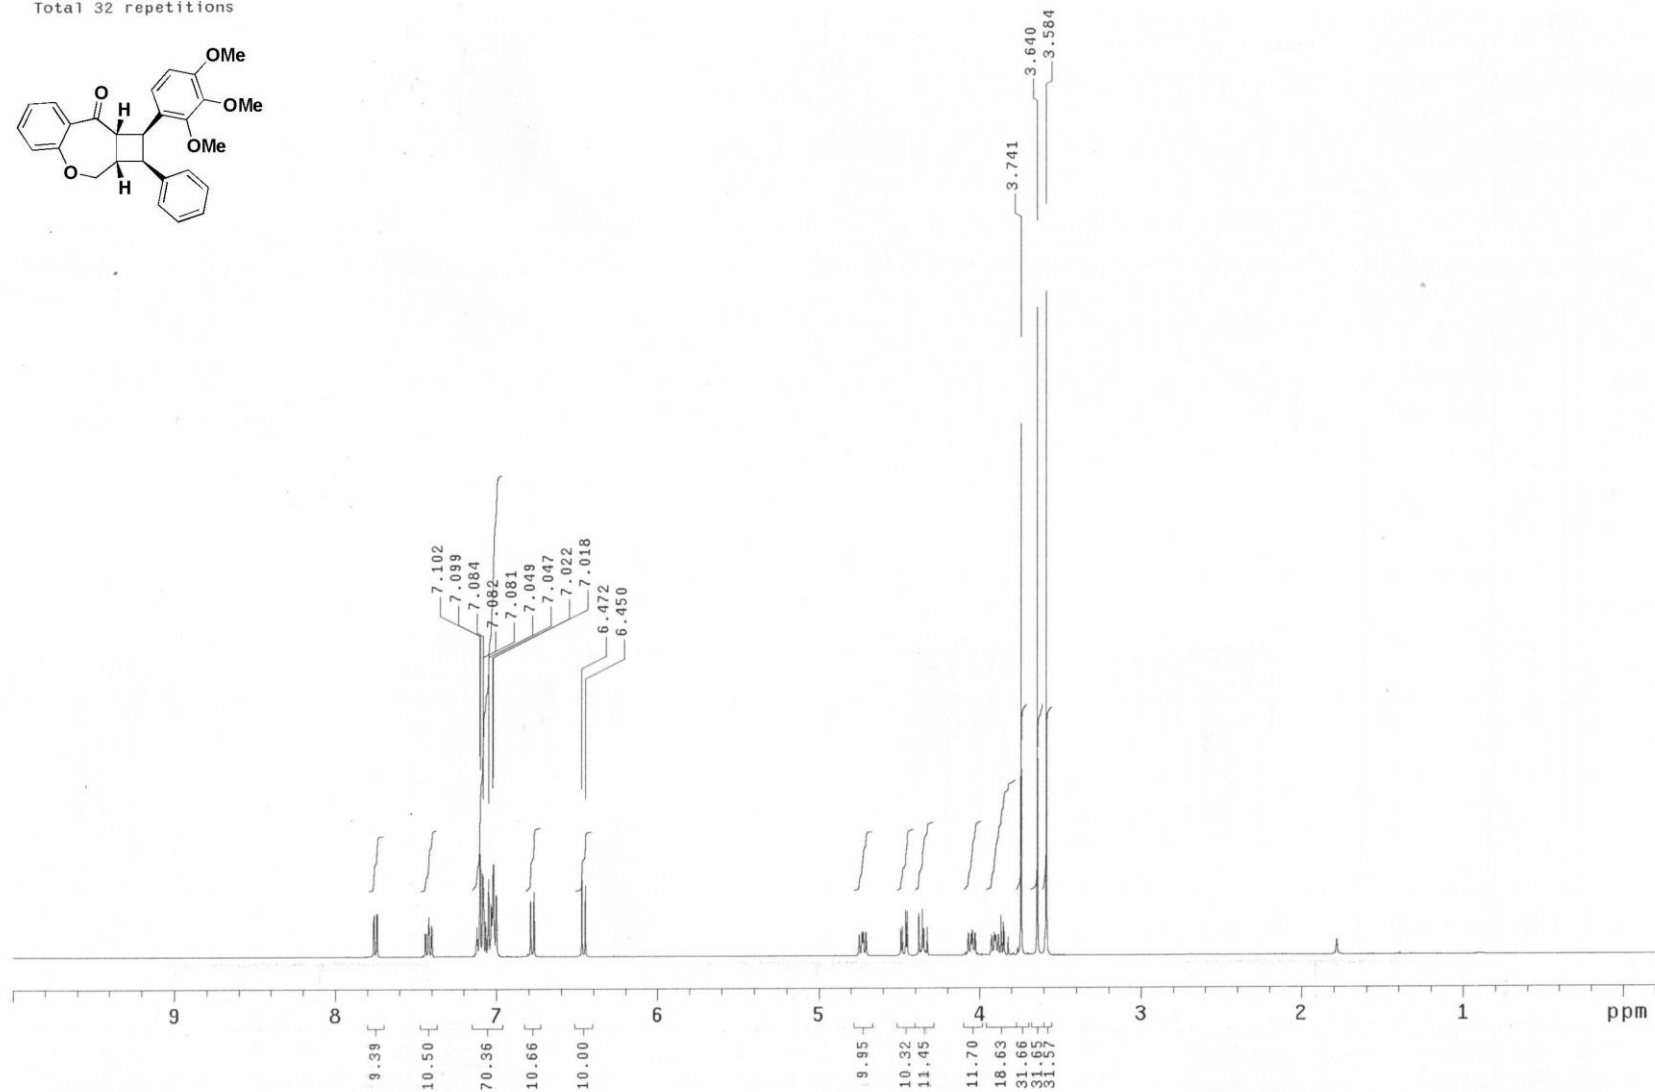

# Compound 6k (<sup>13</sup>C-NMR spectral data)

MC1080616

Pulse Sequence: s2pu1

UNITYplus-400 "unity400"

Date: Jun 17 2019

Solvent: CDCl<sub>3</sub>

Ambient temperature

Total 544 repetitions

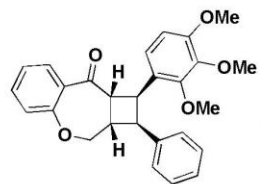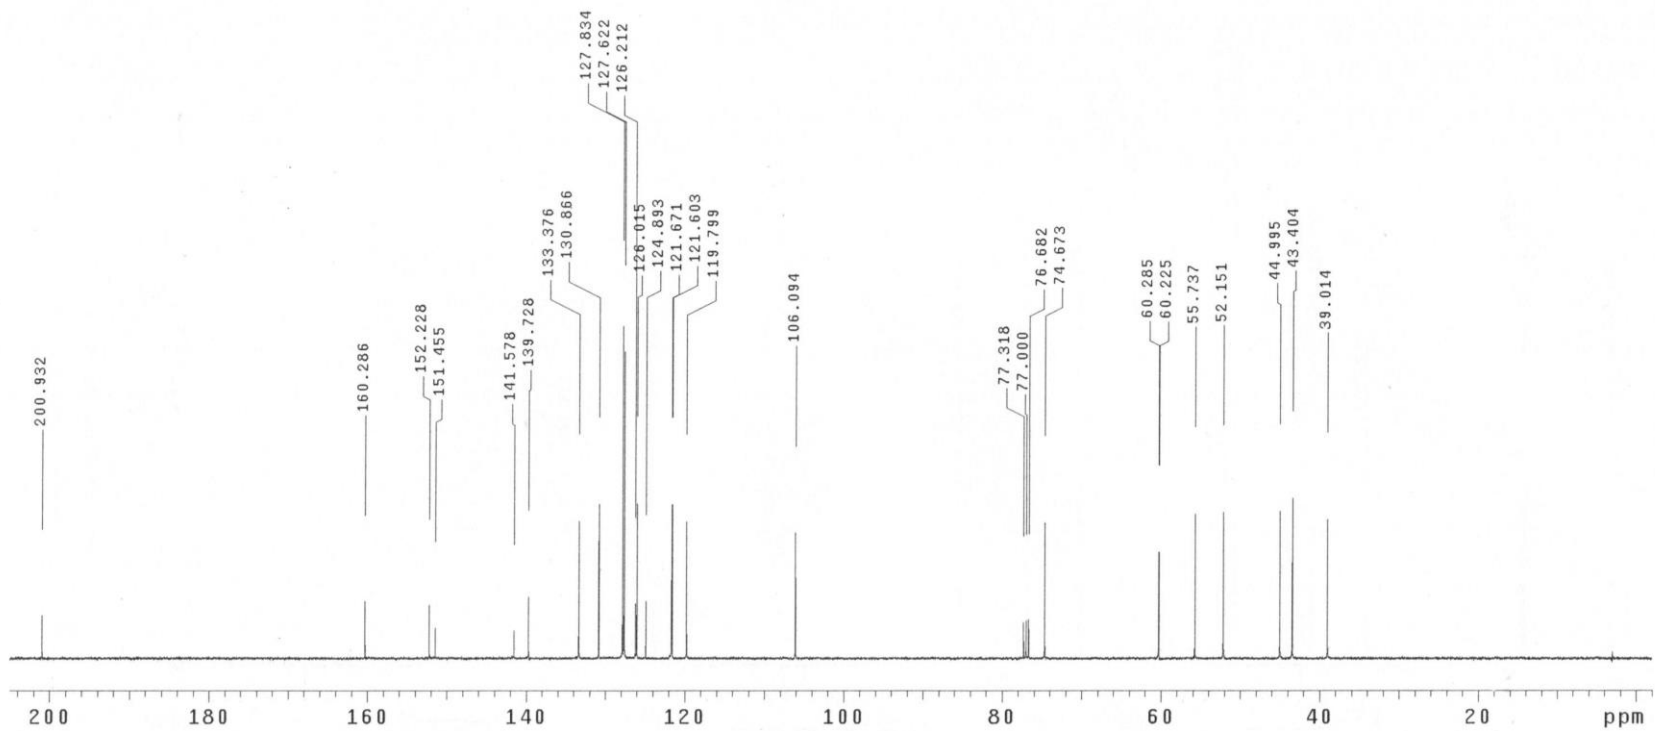

# Compound 6I (<sup>1</sup>H-NMR spectral data)

MC1080516

Pulse Sequence: s2pu1

UNITYplus-400 "unity400"

Date: May 27 2019

Solvent: CDC13

Ambient temperature

Total 32 repetitions

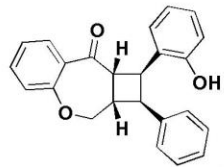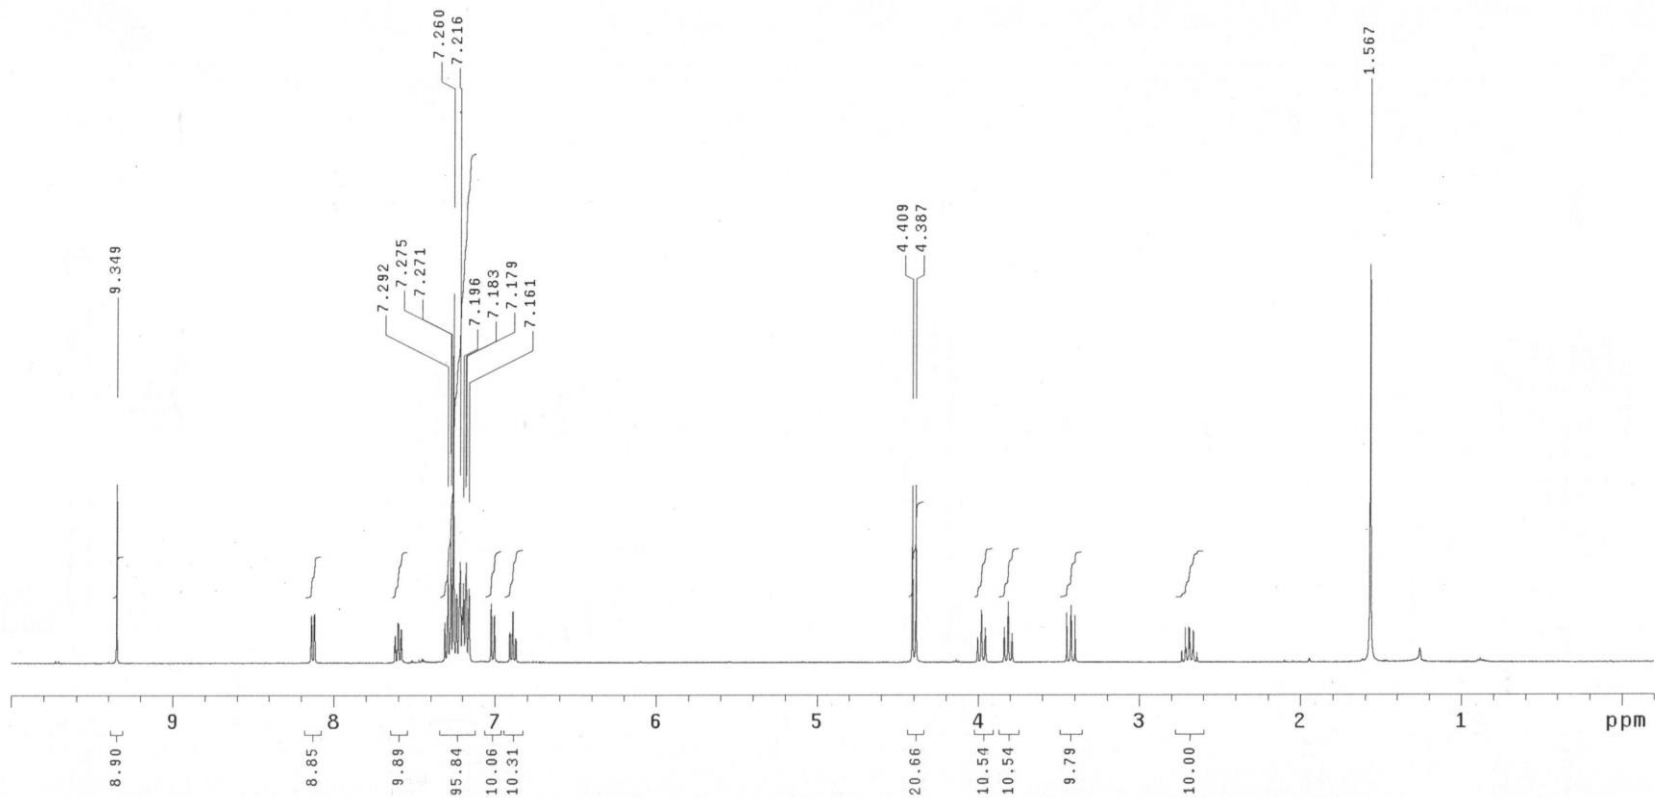



# Compound 6I (<sup>13</sup>C-NMR spectral data)

MC1080516

Pulse Sequence: s2pu1  
UNITYplus-400 "unity400"  
Date: May 27 2019  
Solvent: CDCl<sub>3</sub>  
Ambient temperature  
Total 9808 repetitions

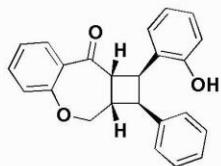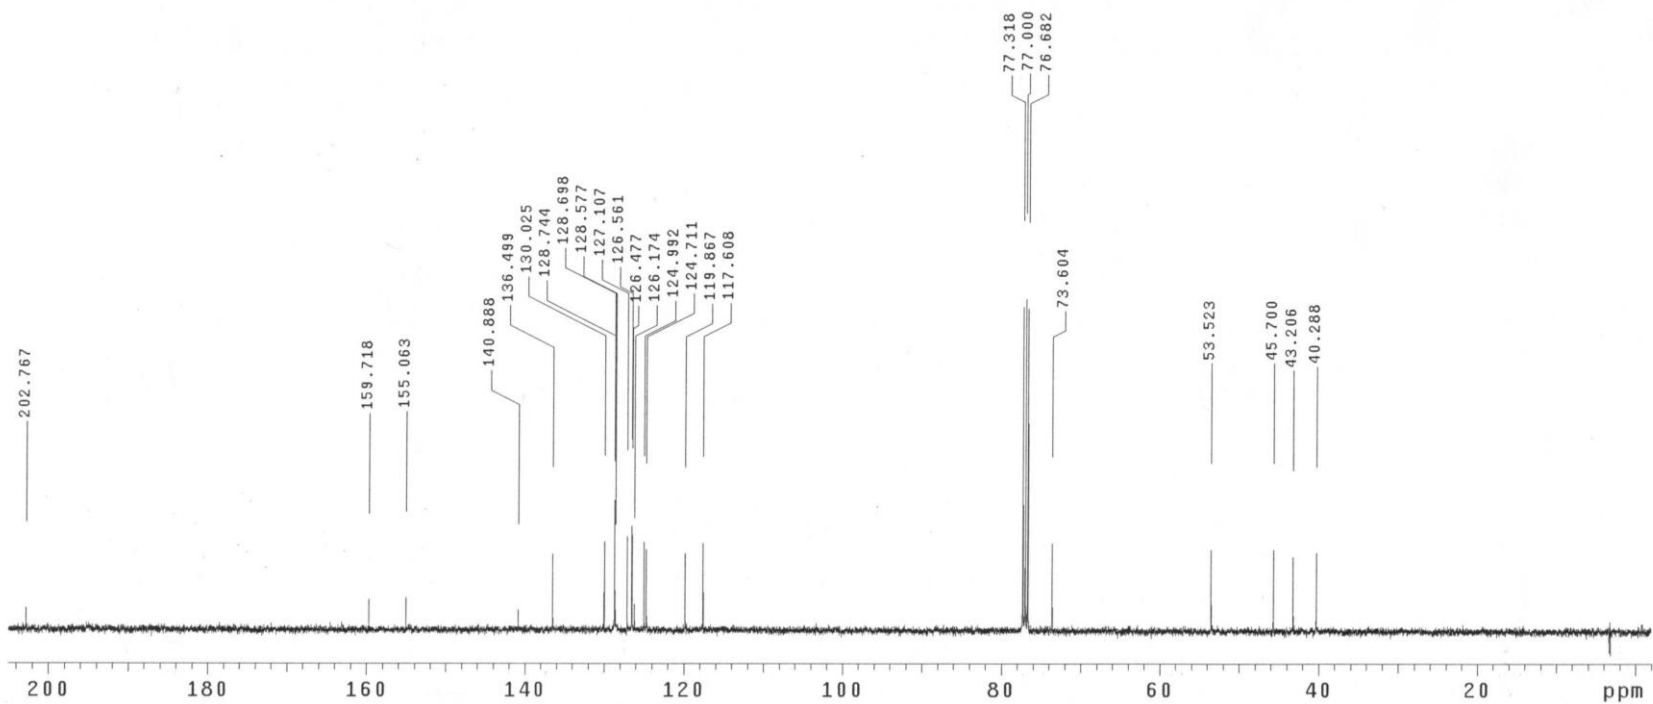

# Compound 6m (<sup>1</sup>H-NMR spectral data)

MC1080506

Pulse Sequence: s2pu1  
UNITYplus-400 "unity400"  
Date: May 7 2019  
Solvent: CDC13  
Ambient temperature  
Total 32 repetitions

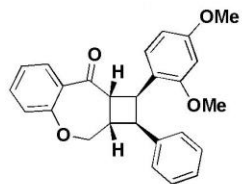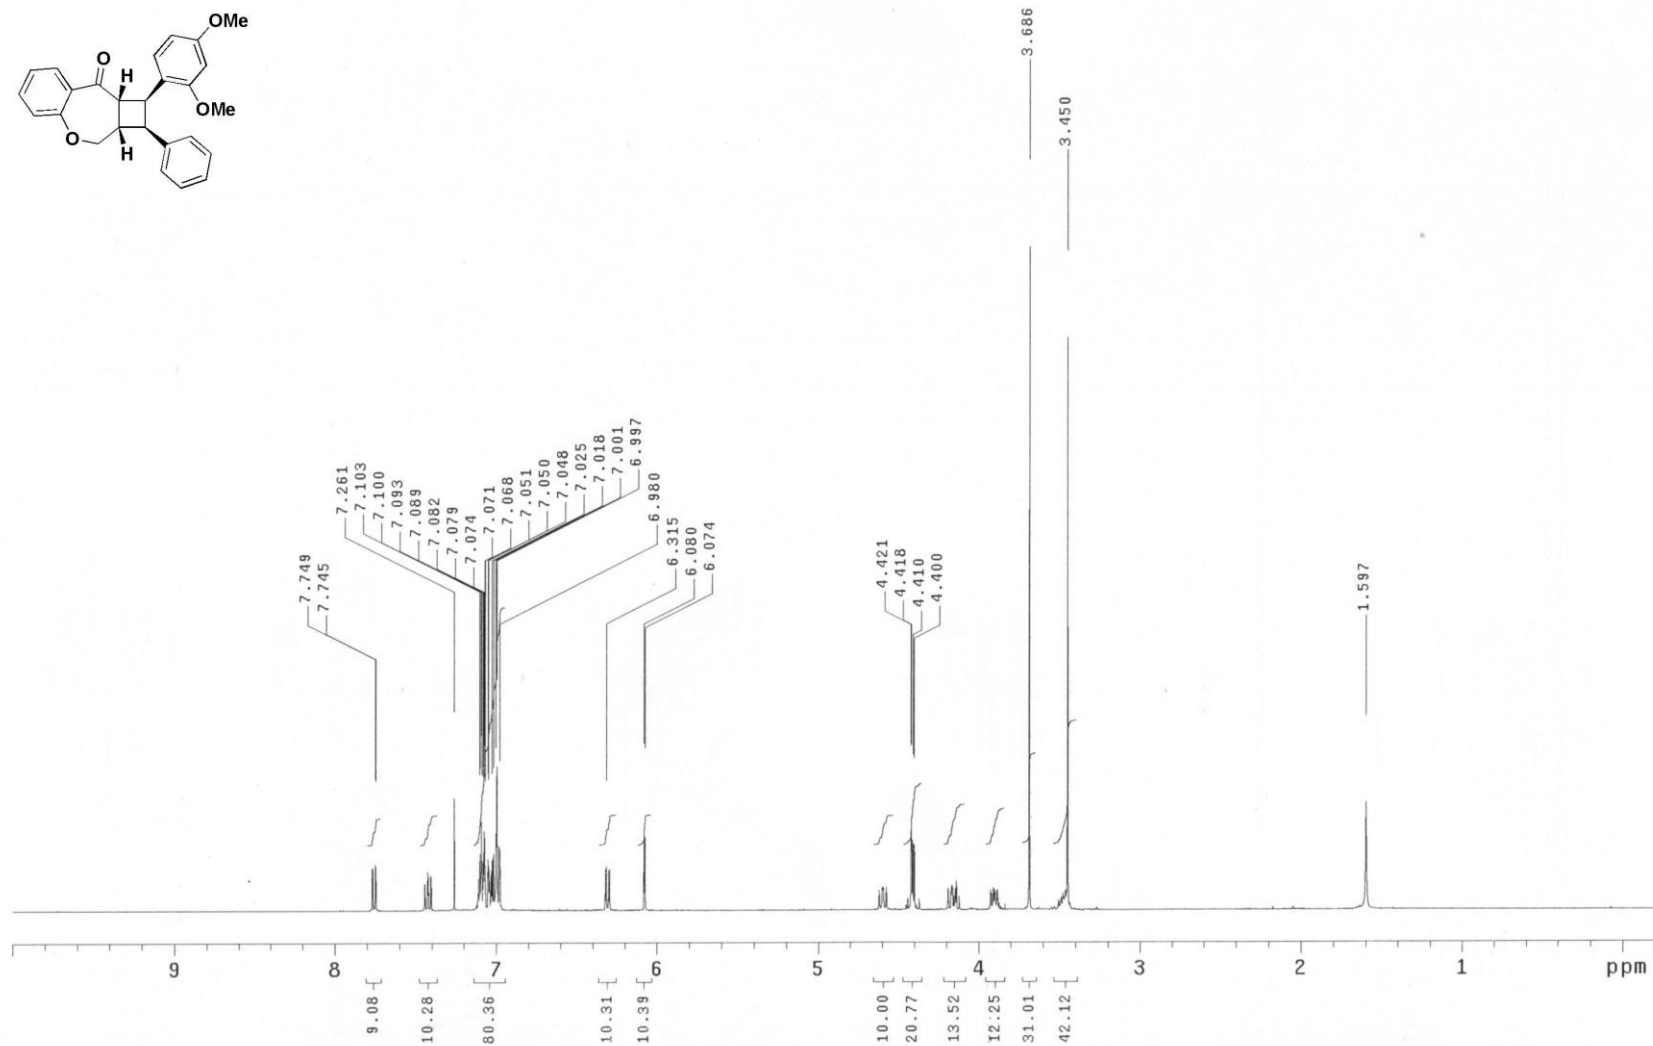

# Compound 6m (<sup>13</sup>C-NMR spectral data)

MC1080506

Pulse Sequence: s2pu1  
UNITYplus-400 "unity400"  
Date: May 7 2019  
Solvent: CDC13  
Ambient temperature  
Total 2064 repetitions

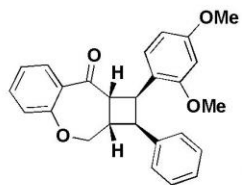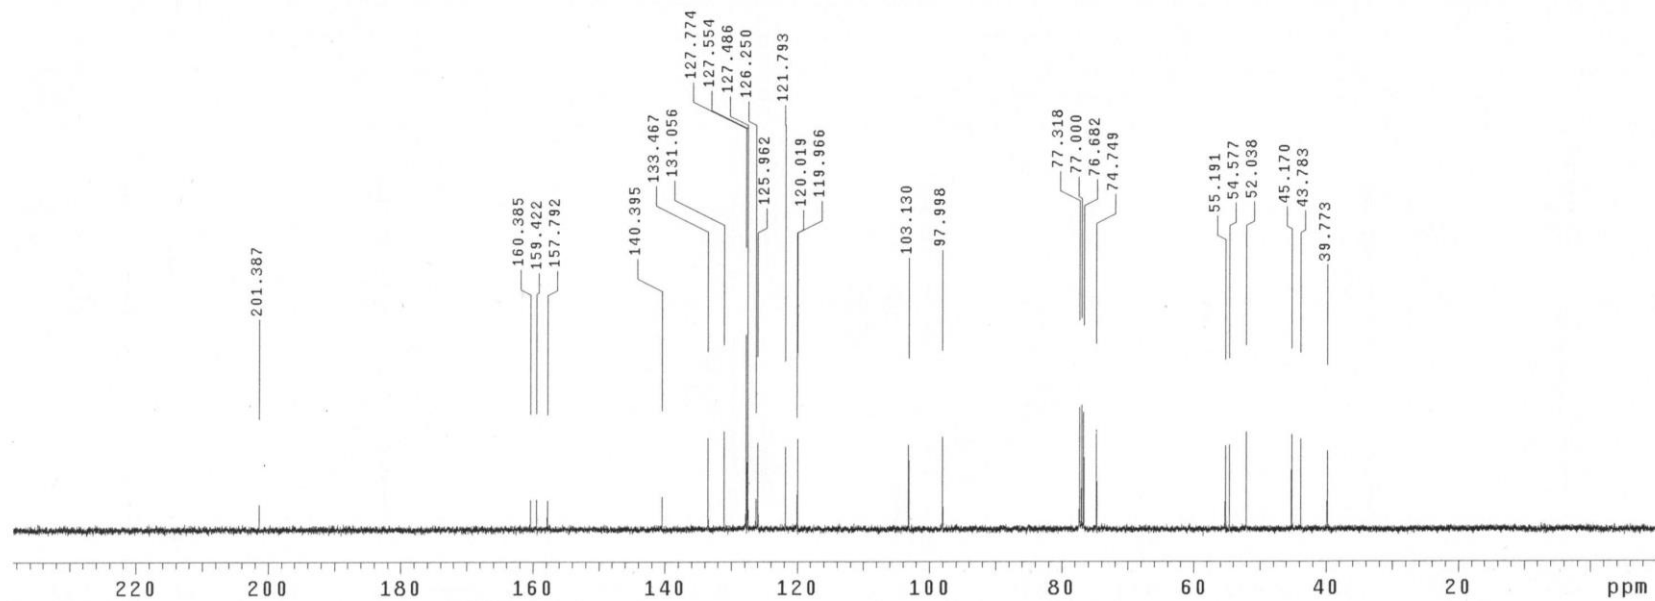

# Compound 6n (<sup>1</sup>H-NMR spectral data)

MC1080604

Pulse Sequence: s2pu1  
UNITYplus-400 "unity400"  
Date: Aug 14 2019  
Solvent: CDC13  
Ambient temperature  
Total 32 repetitions

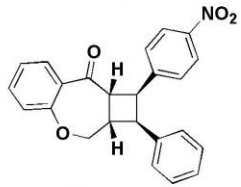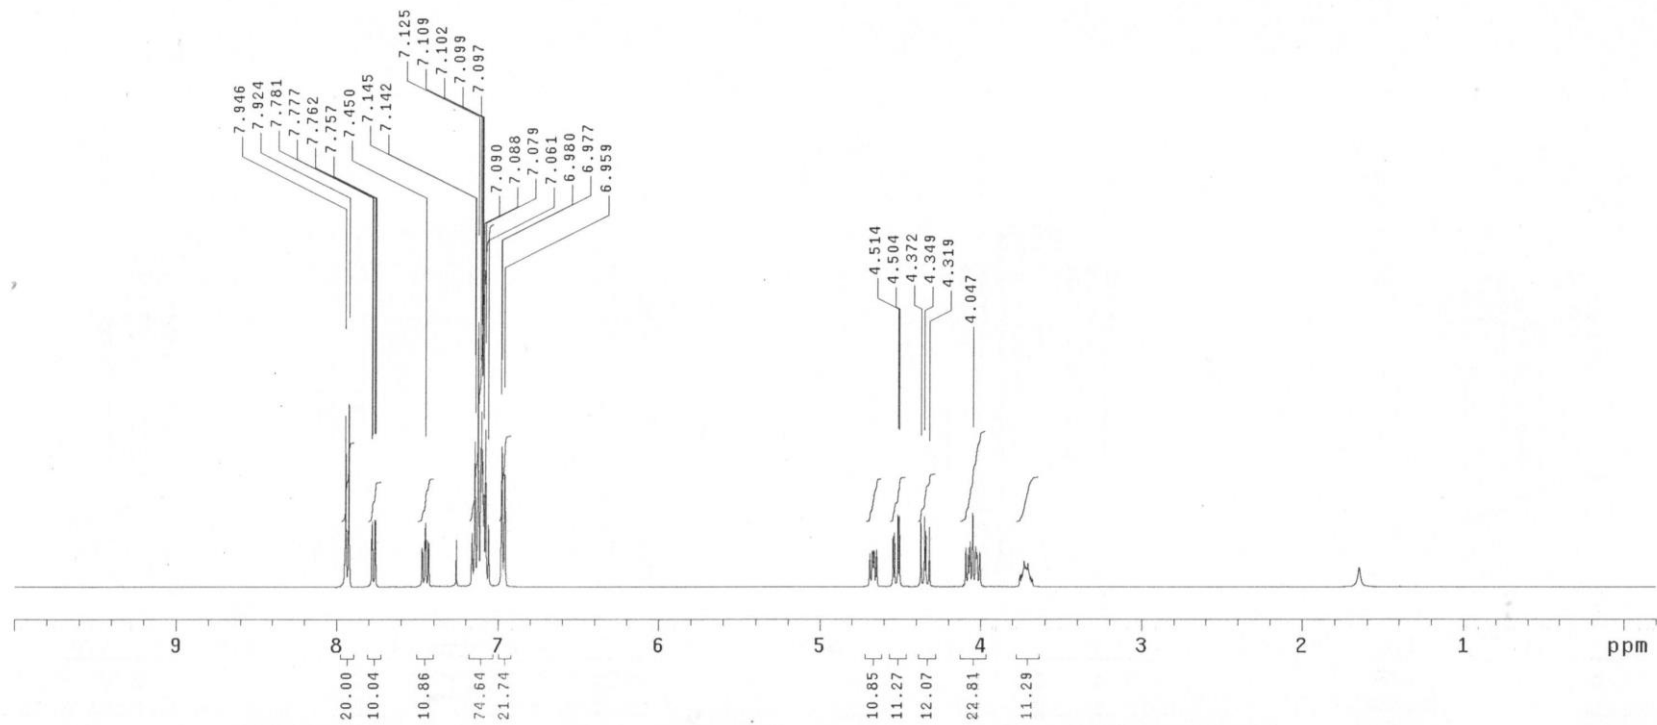

# Compound 6n (<sup>13</sup>C-NMR spectral data)

MC1080604

Pulse Sequence: s2pu1  
UNITYplus-400 "unity400"  
Date: Aug 14 2019  
Solvent: CDCl<sub>3</sub>  
Ambient temperature  
Total 400 repetitions

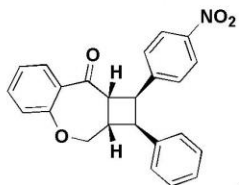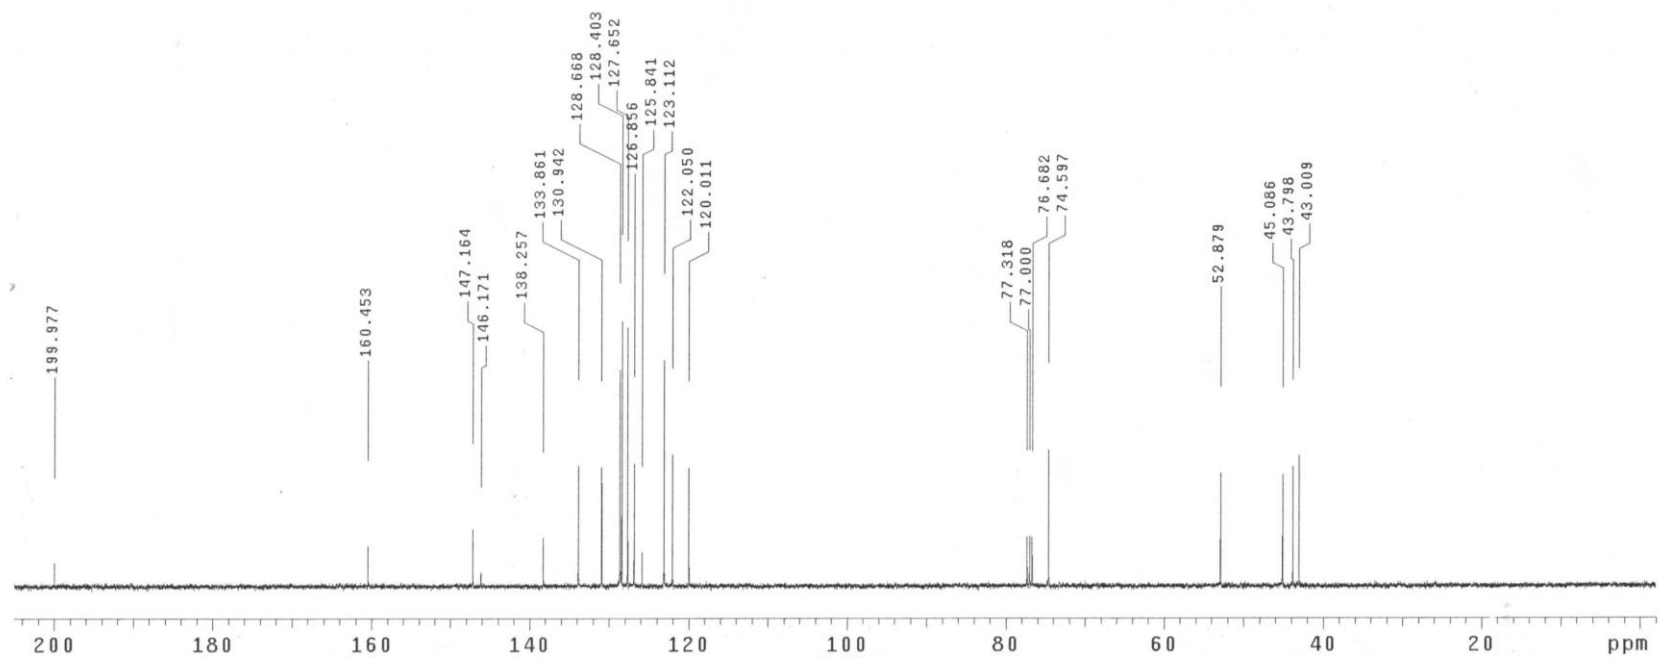

# Compound 6o (<sup>1</sup>H-NMR spectral data)

MC1080430

Pulse Sequence: s2pu1  
Mercury-400BB "MerPlus400"  
Date: May 22 2019  
Solvent: CDCl<sub>3</sub>  
Ambient temperature  
Total 32 repetitions

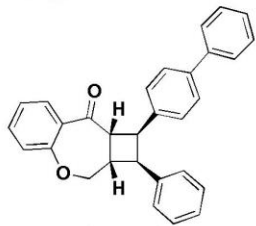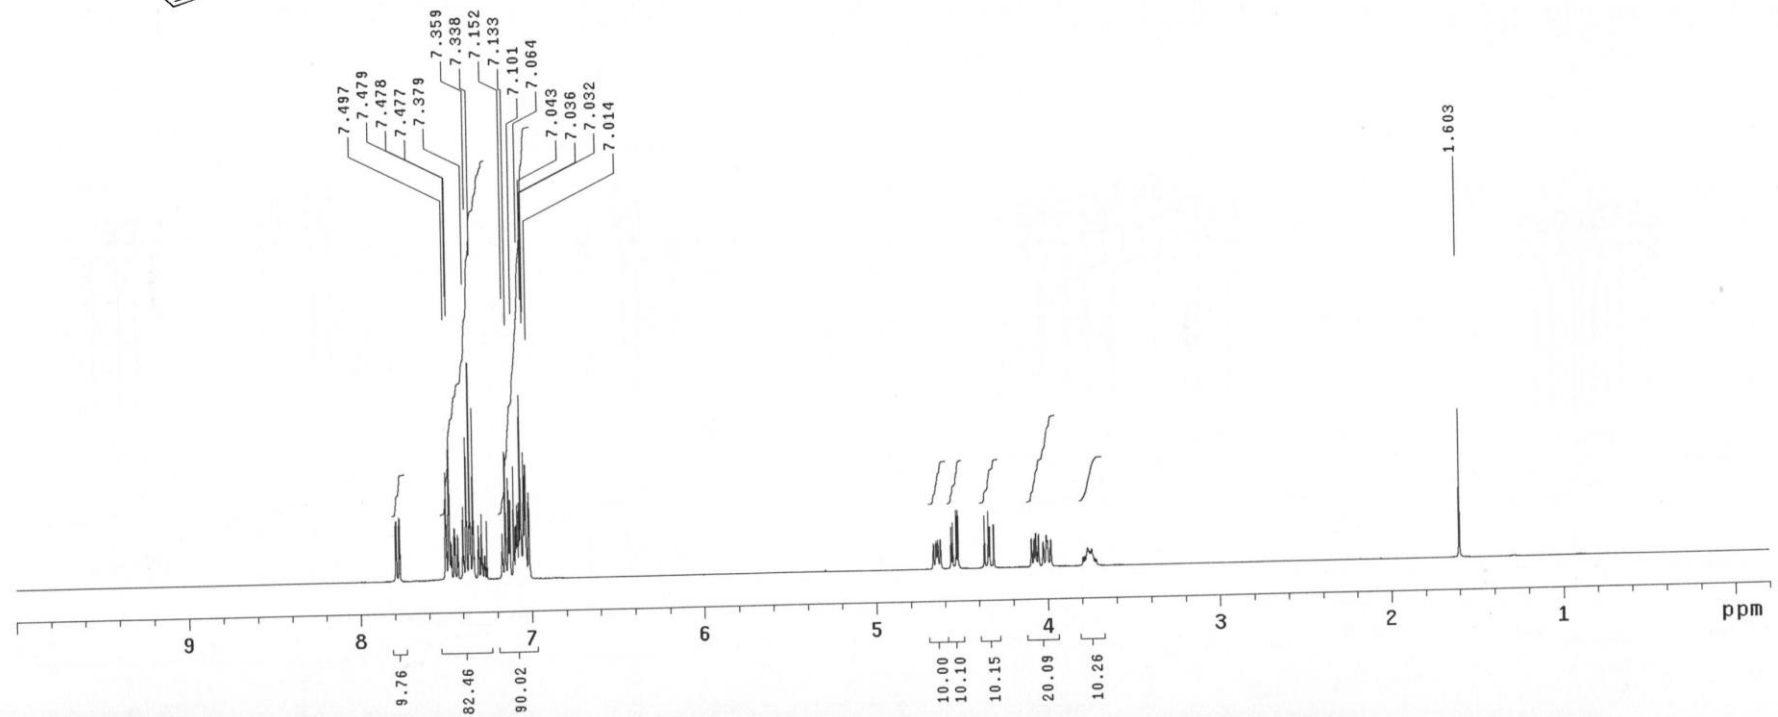

# Compound 6o (<sup>13</sup>C-NMR spectral data)

MC1080430

Pulse Sequence: s2pu1  
Mercury-400BB "MerPlus400"  
Date: May 22 2019  
Solvent: cdc13  
Ambient temperature  
Total 400 repetitions

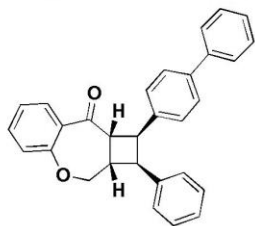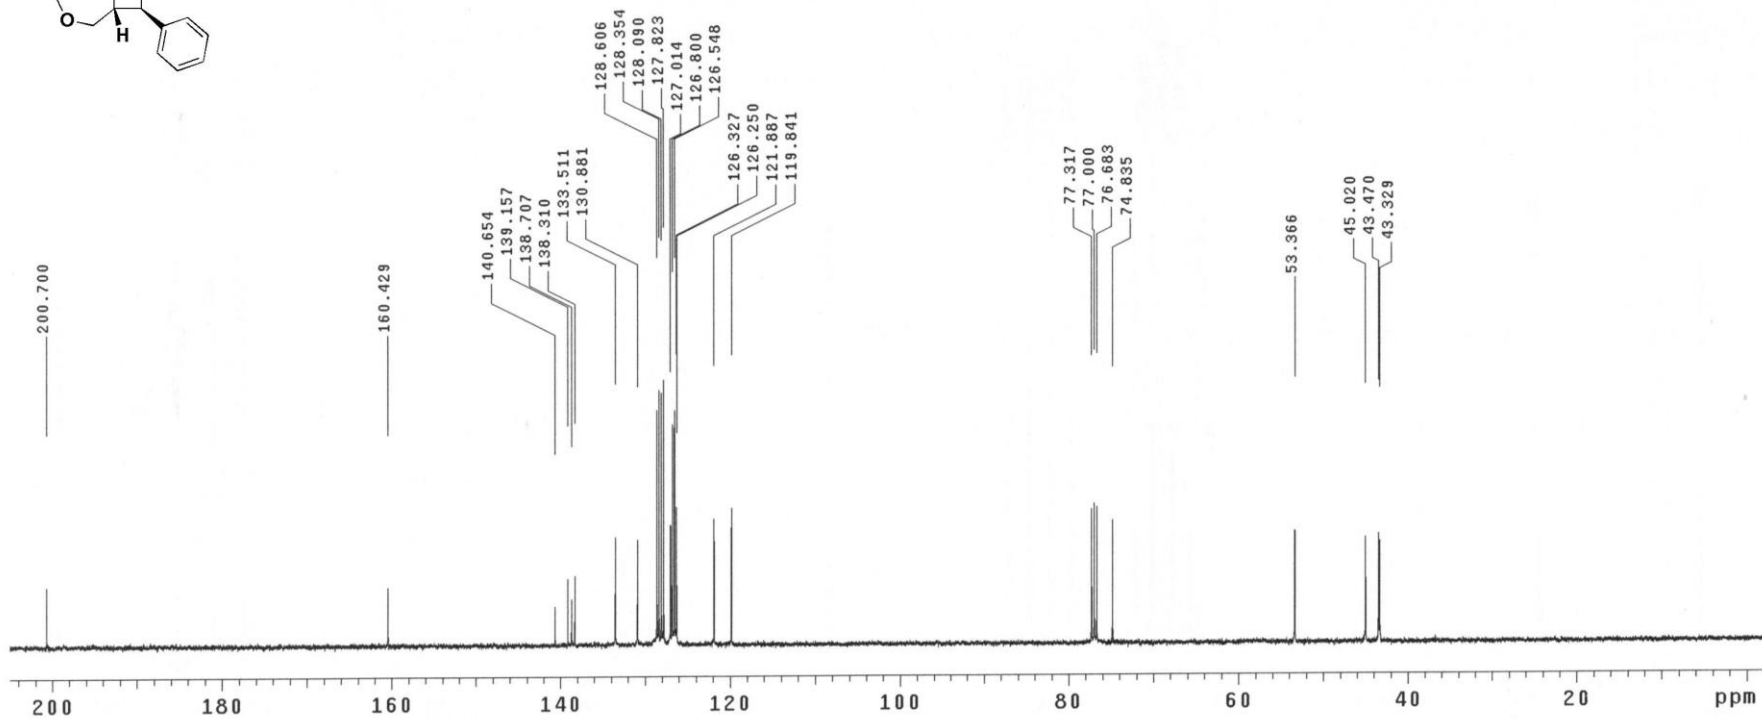

# Compound 6p (<sup>1</sup>H-NMR spectral data)

MC10806C12

Pulse Sequence: s2pu1  
UNITYplus-400 "unity400"  
Date: Jul 11 2019  
Solvent: CDCl<sub>3</sub>  
Ambient temperature  
Total 32 repetitions

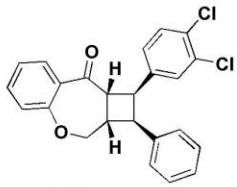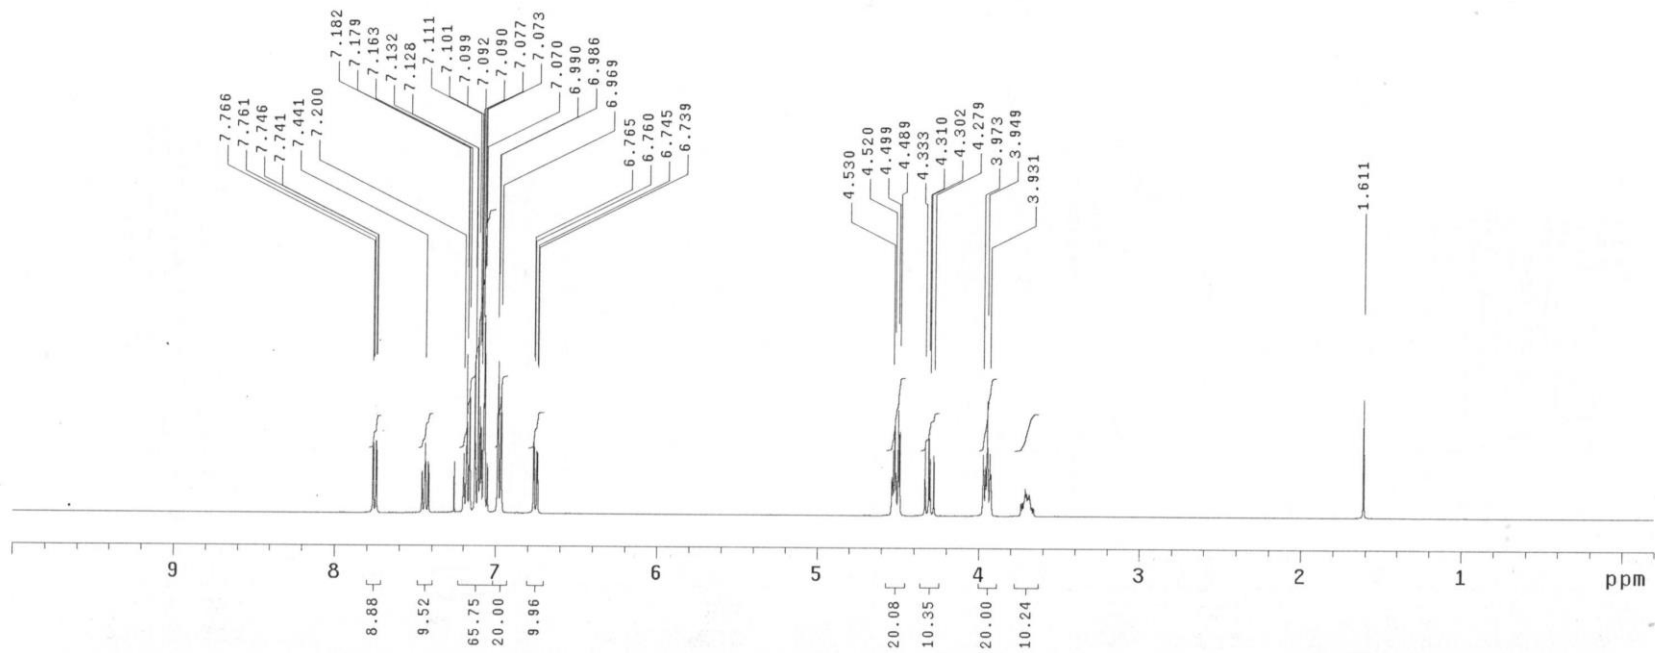



# Compound 6p (<sup>13</sup>C-NMR spectral data)

MC10806C12

Pulse Sequence: s2pu1  
UNITYplus-400 "unity400"  
Date: Jul 11 2019  
Solvent: CDCl<sub>3</sub>  
Ambient temperature  
Total 576 repetitions

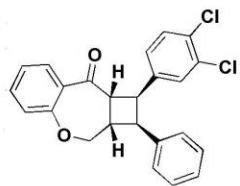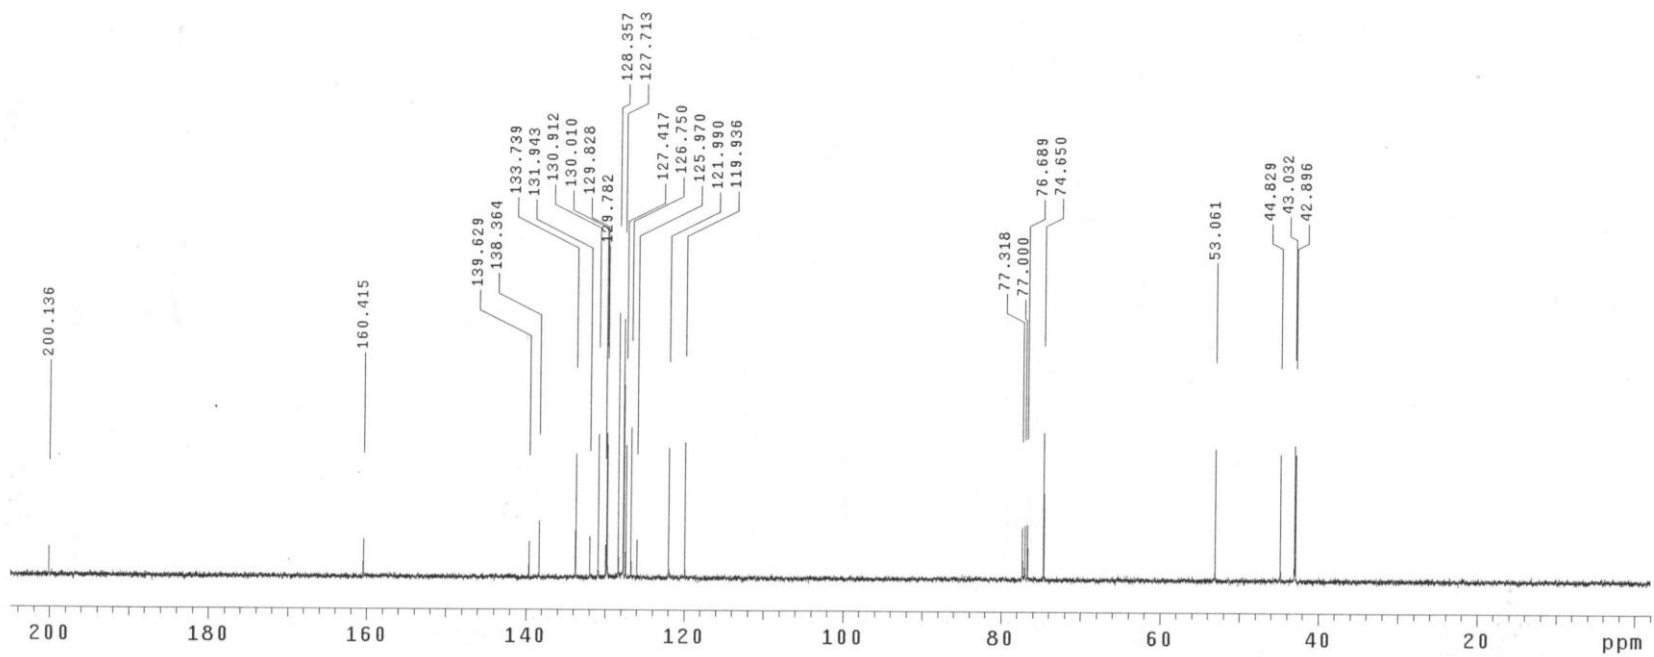

# Compound 6q (<sup>1</sup>H-NMR spectral data)

MC1080515

Pulse Sequence: s2pu1  
UNITYplus-400 "unity400"  
Date: May 20 2019  
Solvent: CDCl<sub>3</sub>  
Ambient temperature  
Total 32 repetitions

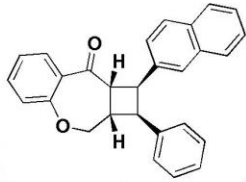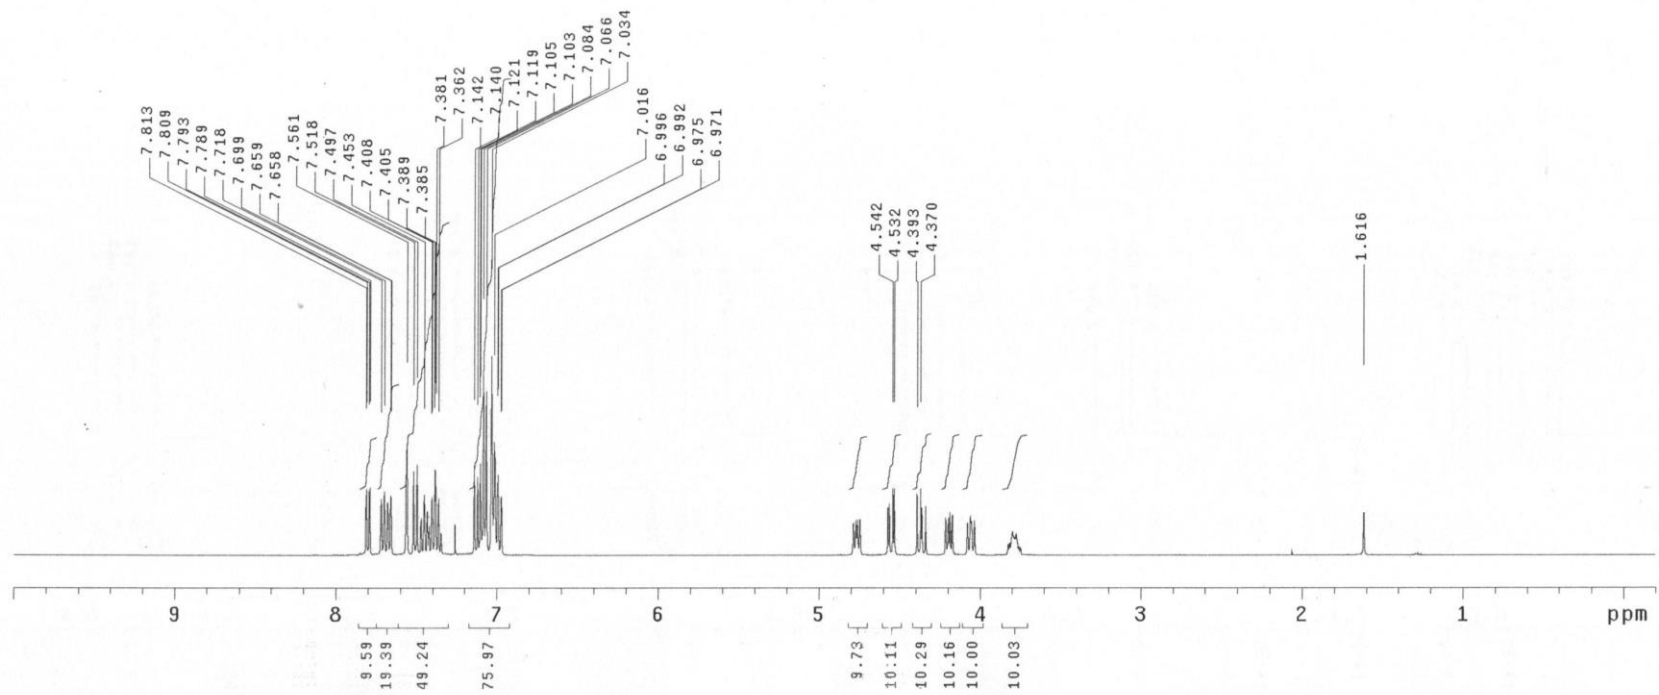

# Compound 6q (<sup>13</sup>C-NMR spectral data)

MC1080515

Pulse Sequence: s2pu1  
UNITYplus-400 "unity400"  
Date: May 20 2019  
Solvent: CDCl<sub>3</sub>  
Ambient temperature  
Total 1104 repetitions

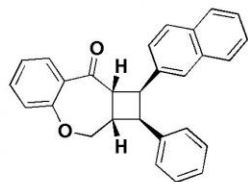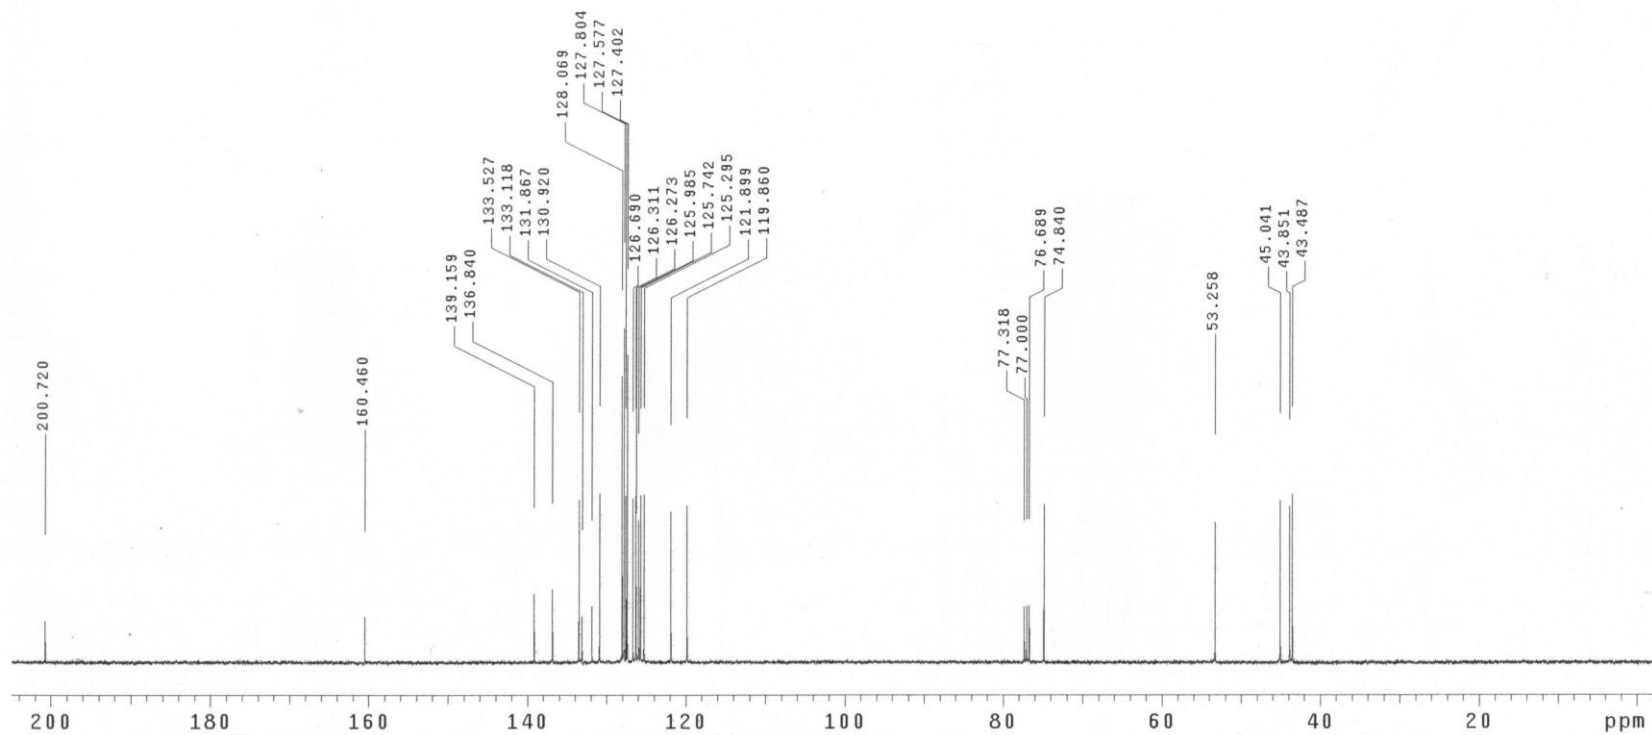

# Compound 6r (<sup>1</sup>H-NMR spectral data)

MC1080508

Pulse Sequence: s2pu1  
UNITYplus-400 "unity400"  
Date: May 9 2019  
Solvent: CDCl<sub>3</sub>  
Ambient temperature  
Total 32 repetitions

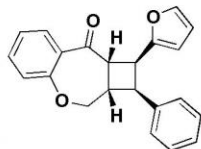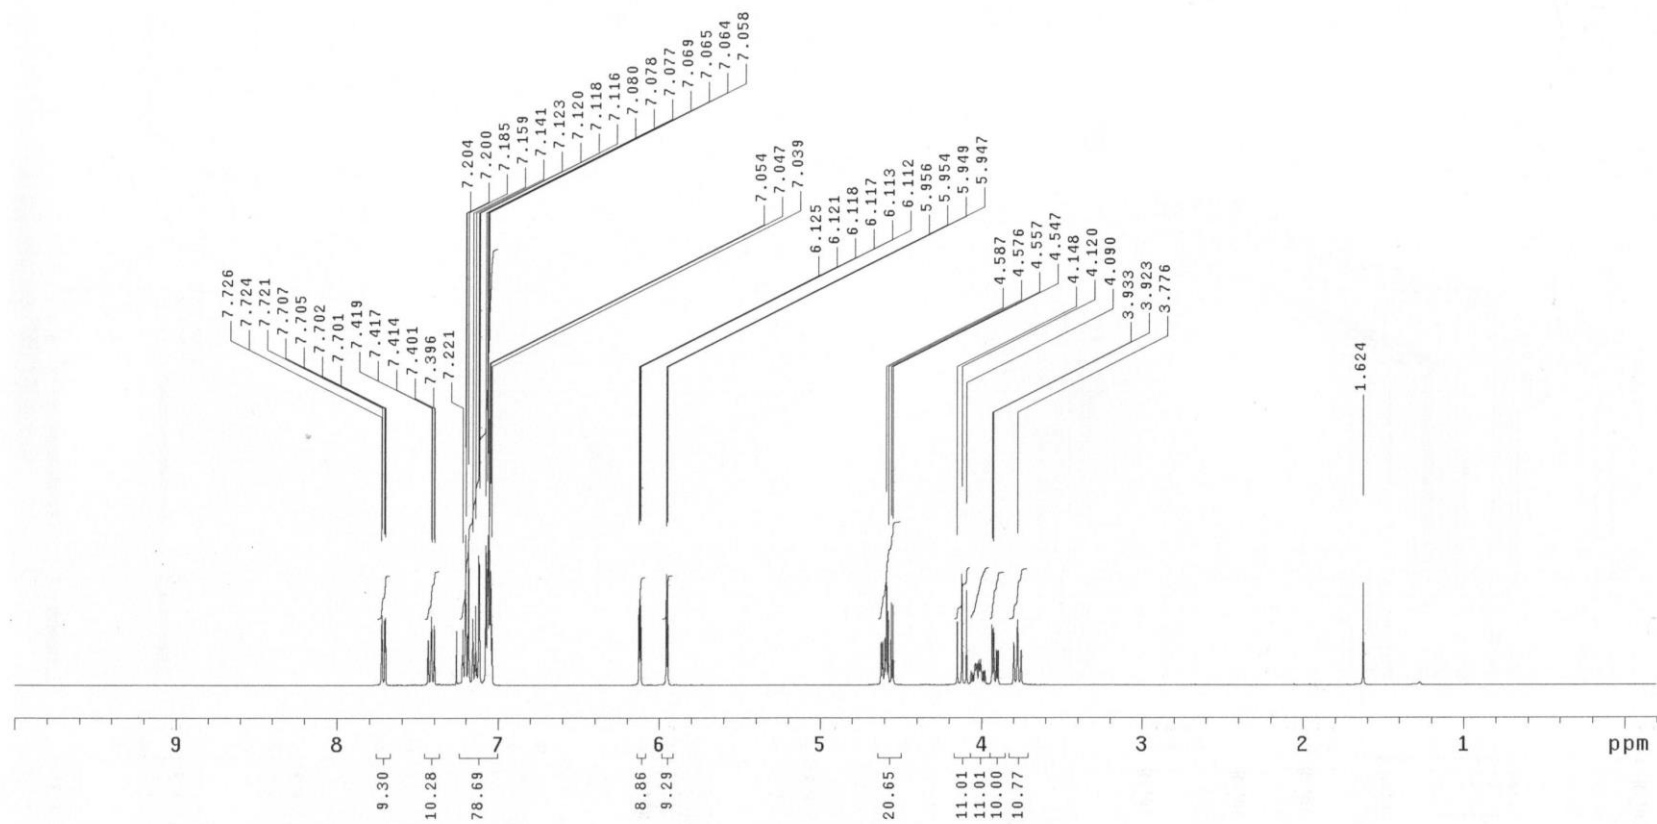

# Compound 6r (<sup>13</sup>C-NMR spectral data)

MC1080508

Pulse Sequence: s2pu1  
UNITYplus-400 "unity400"  
Date: May 9 2019  
Solvent: CDCl<sub>3</sub>  
Ambient temperature  
Total 1344 repetitions

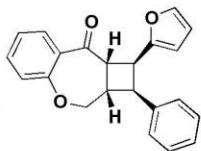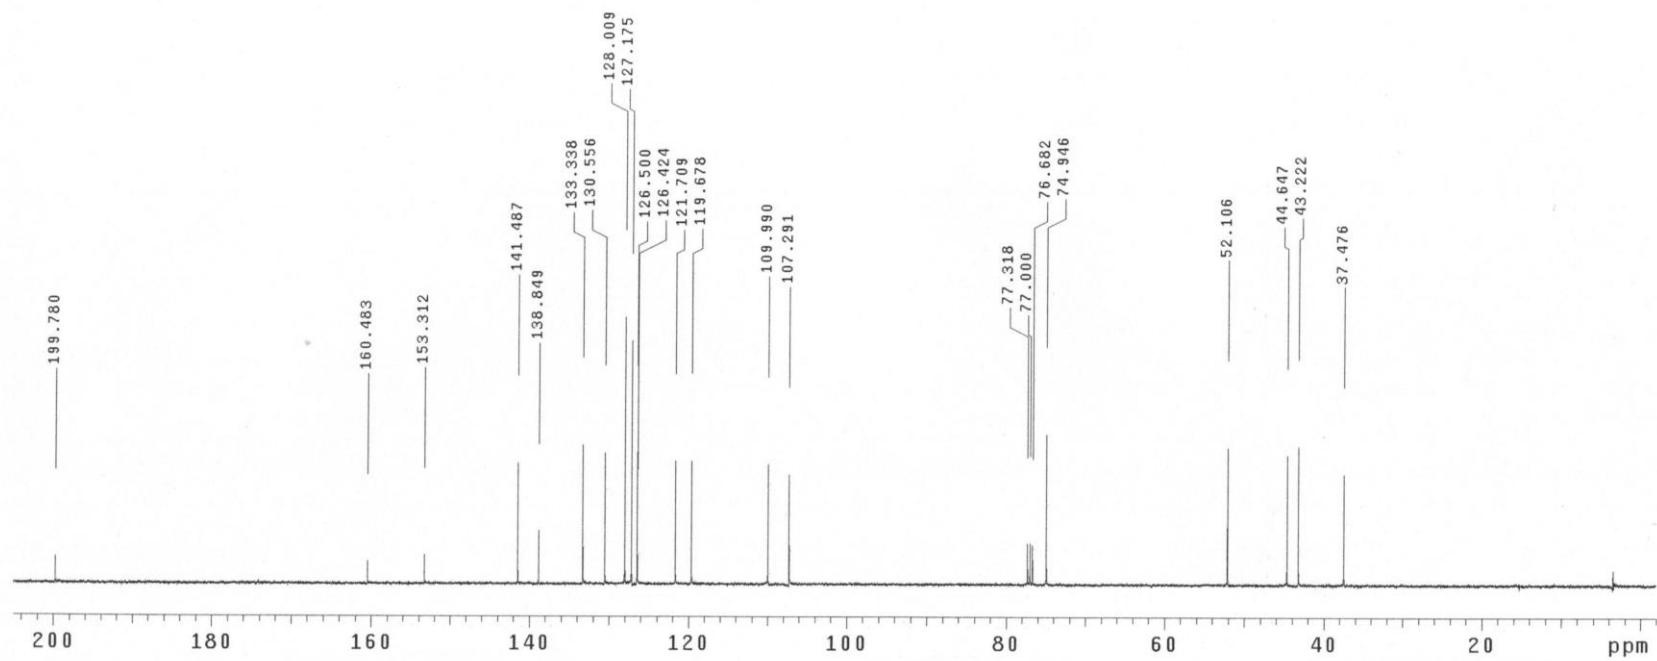

# Compound 6s (<sup>1</sup>H-NMR spectral data)

MC1080520

Pulse Sequence: s2pu1

UNITYplus-400 "unity400"

Date: May 21 2019

Solvent: CDCl<sub>3</sub>

Ambient temperature

Total 32 repetitions

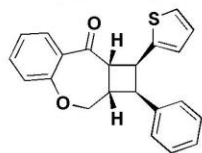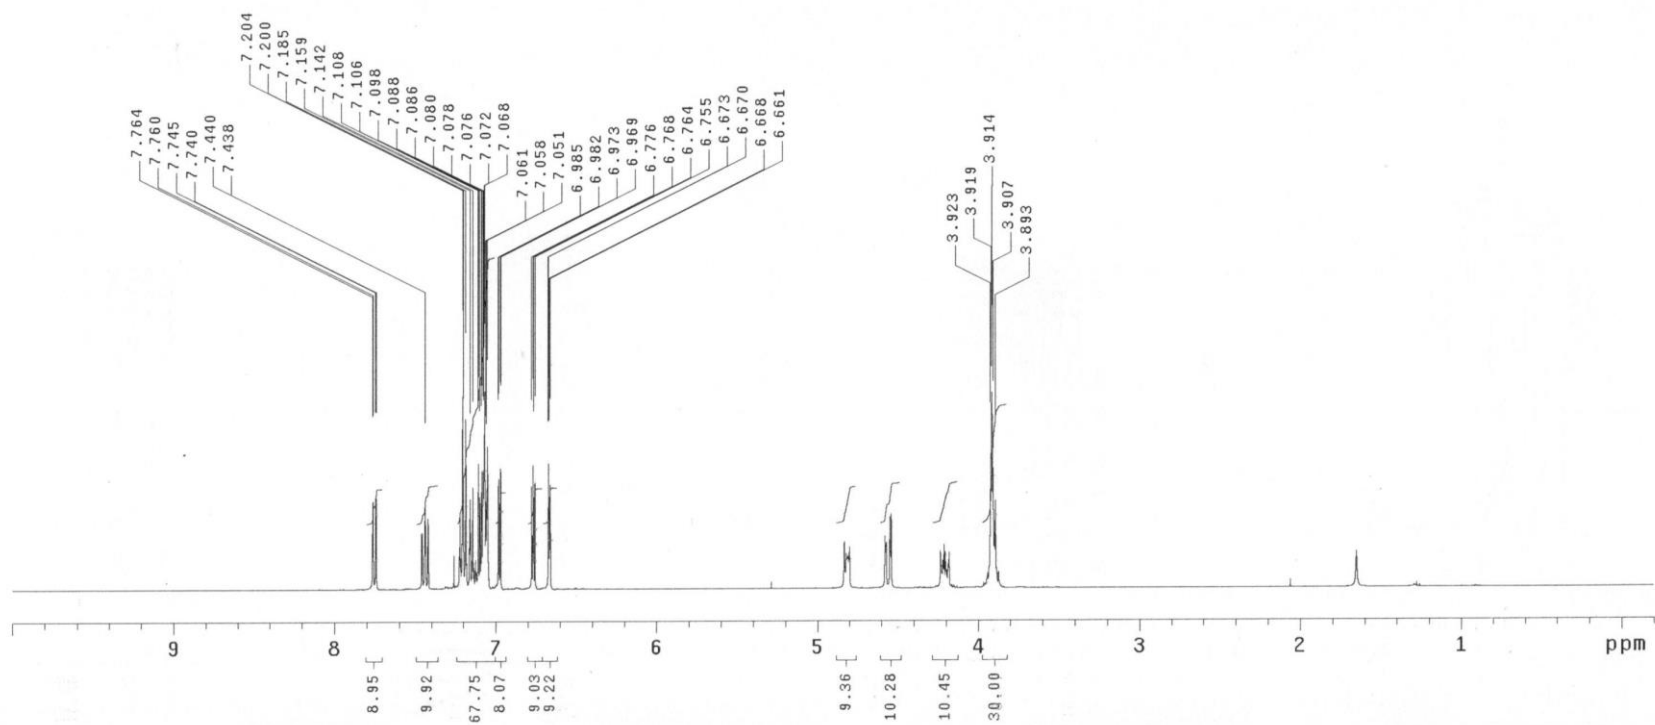

# Compound 6s (<sup>13</sup>C-NMR spectral data)

Mc1080520

Pulse Sequence: s2pu1  
UNITYplus-400 "unity400"  
Date: May 21 2019  
Solvent: CDCl<sub>3</sub>  
Ambient temperature  
Total 304 repetitions

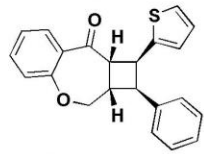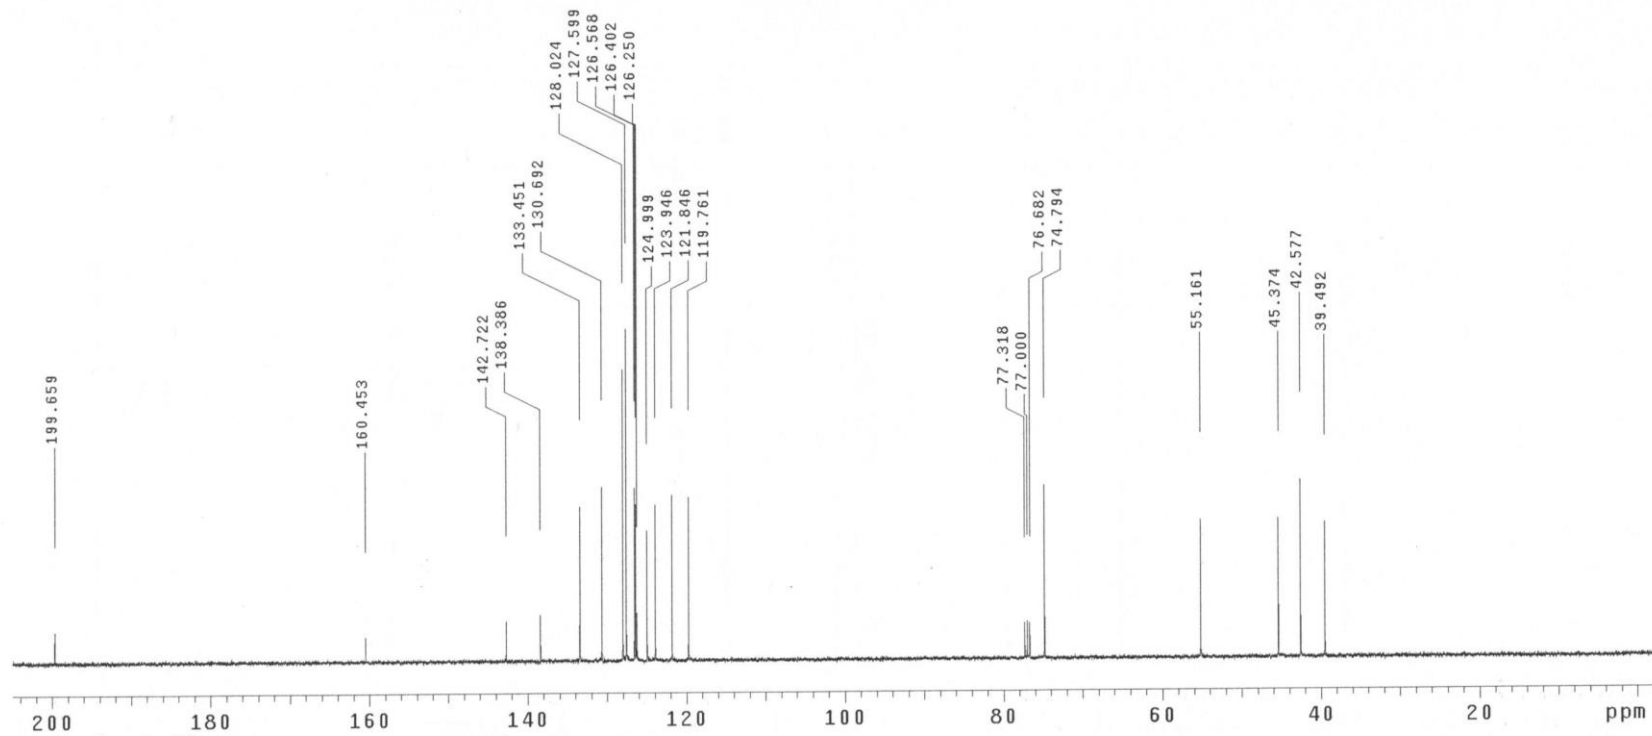

# Compound 6t (<sup>1</sup>H-NMR spectral data)

MC1080521

Pulse Sequence: s2pu1

UNITYplus-400 "unity400"

Date: May 21 2019

Solvent: CDCl<sub>3</sub>

Ambient temperature

Total 32 repetitions

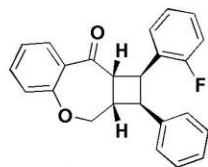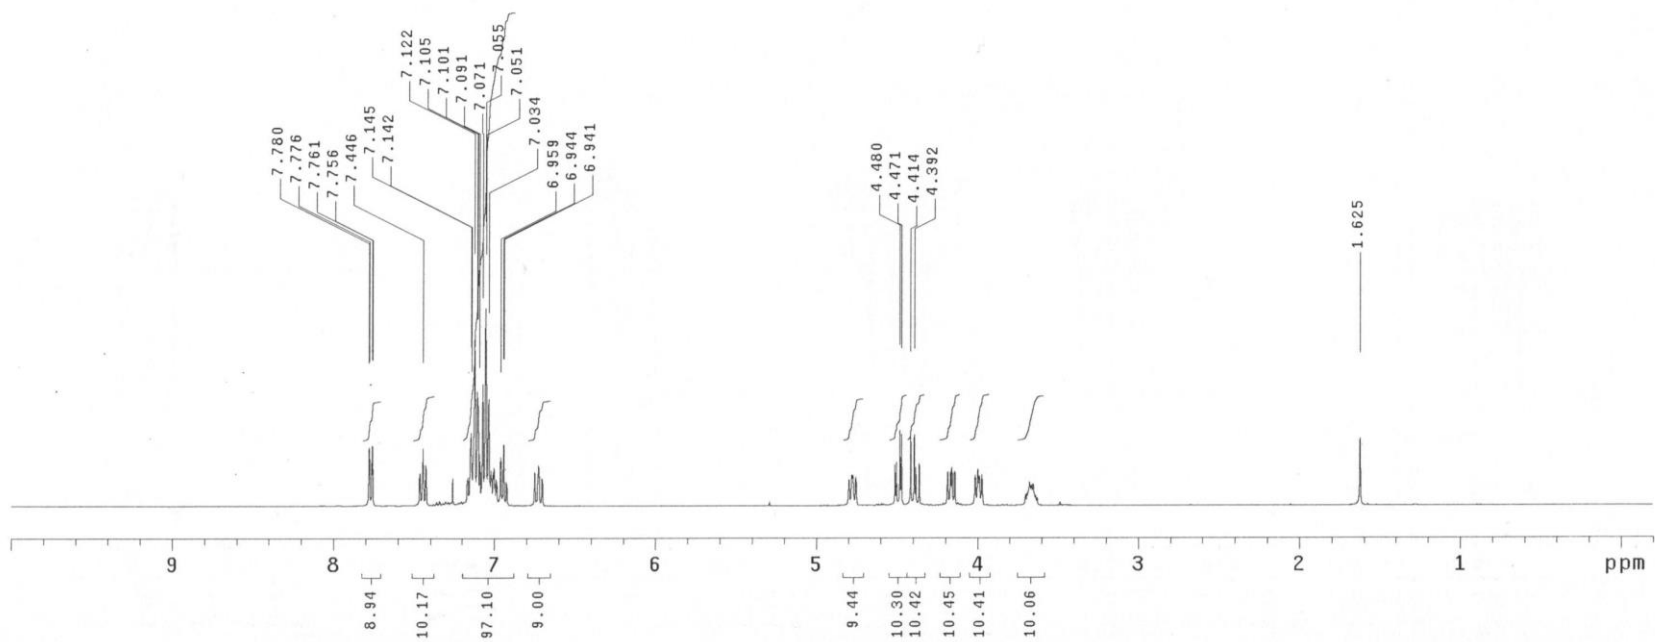



# Compound 6t (<sup>13</sup>C-NMR spectral data)

MC1080521

Pulse Sequence: s2pu1

UNITYplus-400 "unity400"

Date: May 21 2019

Solvent: CDCl<sub>3</sub>

Ambient temperature

Total 1344 repetitions

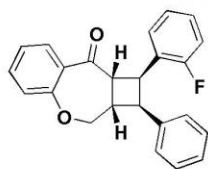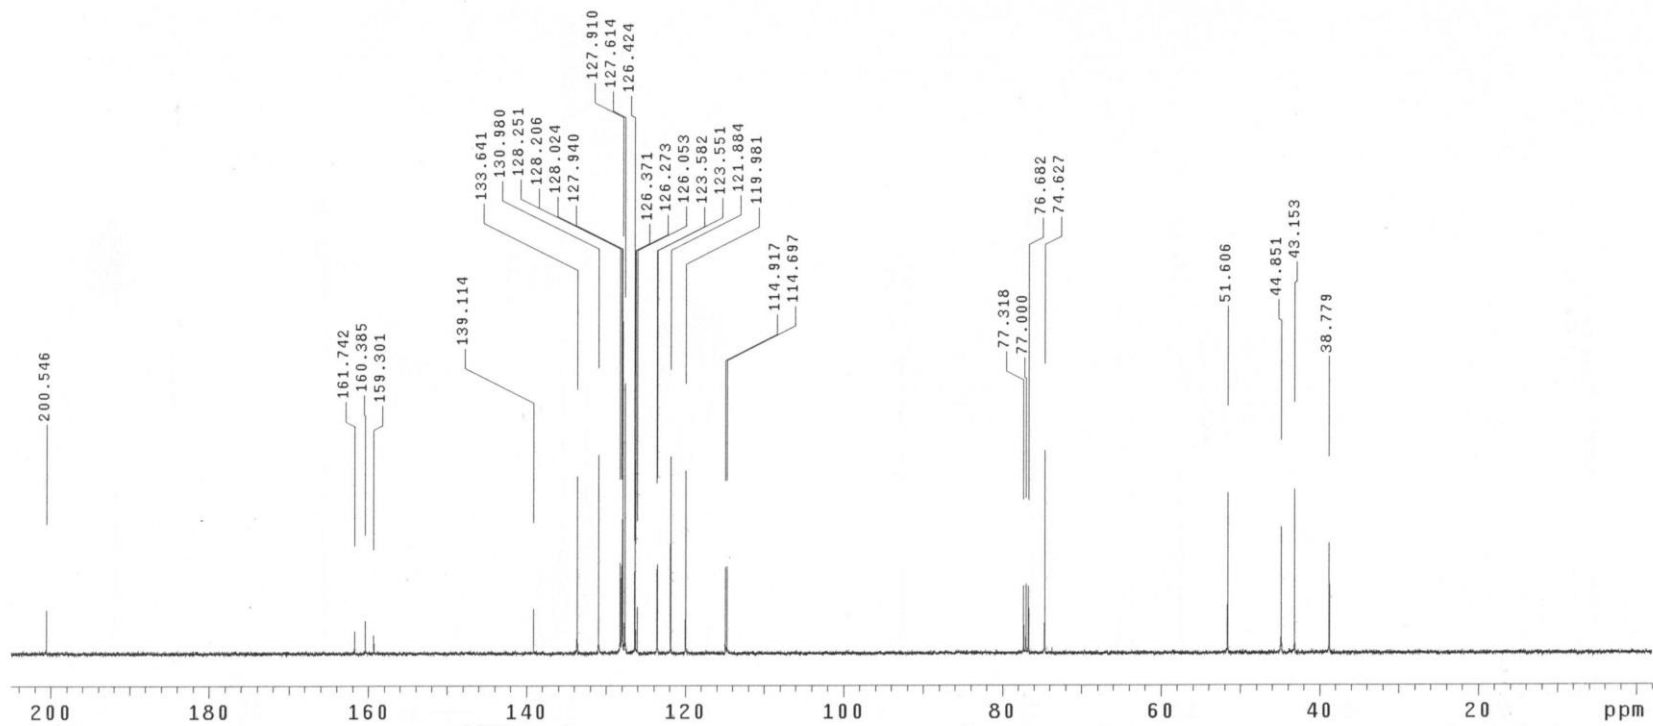

# Compound 6u (<sup>1</sup>H-NMR spectral data)

MC1080606

Pulse Sequence: s2pu1  
UNITYplus-400 "unity400"  
Date: Jun 6 2019  
Solvent: CDCl<sub>3</sub>  
Ambient temperature  
Total 32 repetitions

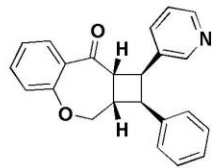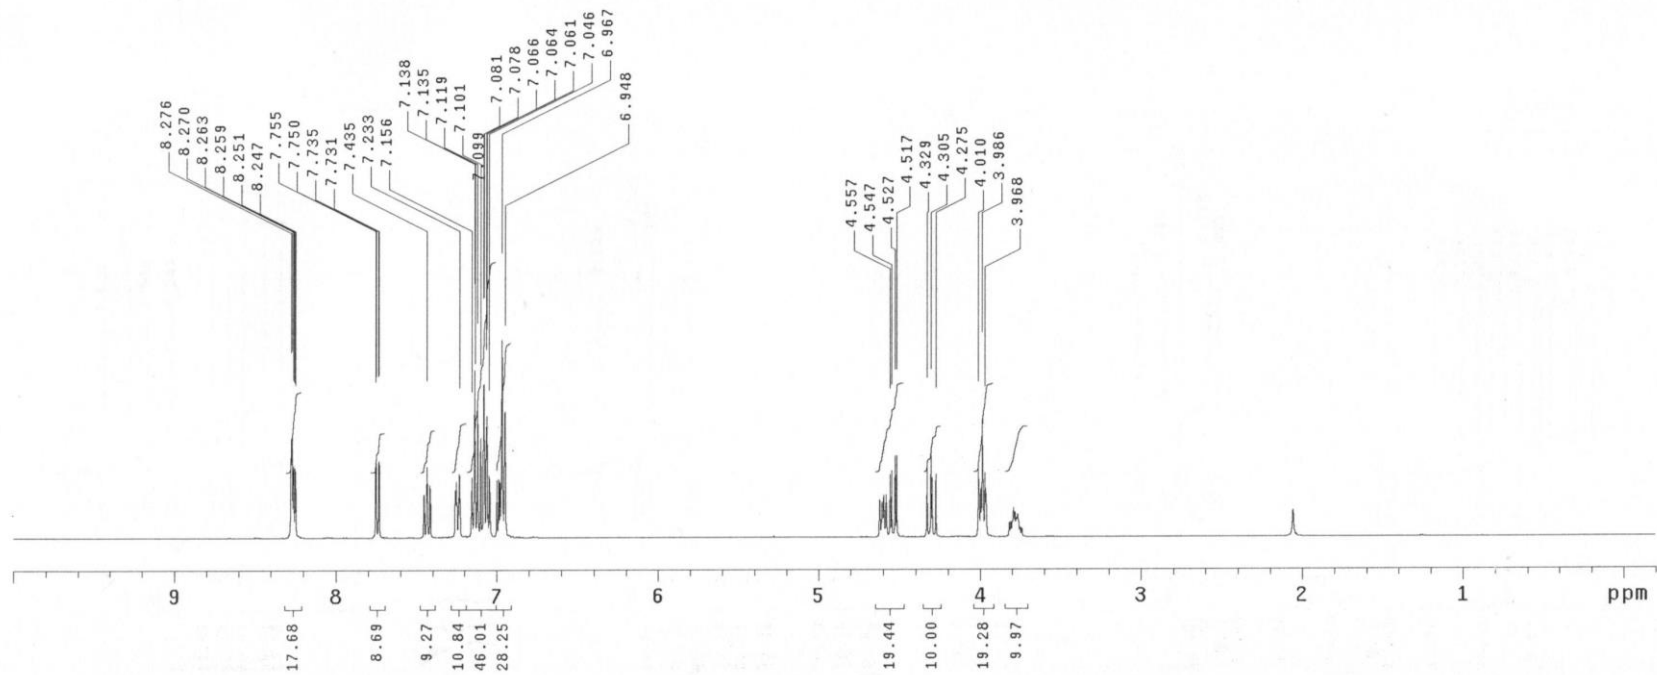

# Compound 6u (<sup>13</sup>C-NMR spectral data)

MC1080606

Pulse Sequence: s2pu1

UNITYplus-400 "unity400"

Date: Jun 5 2019

Solvent: CDCl<sub>3</sub>

Ambient temperature

Total 816 repetitions

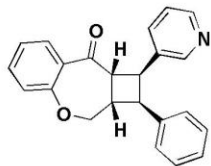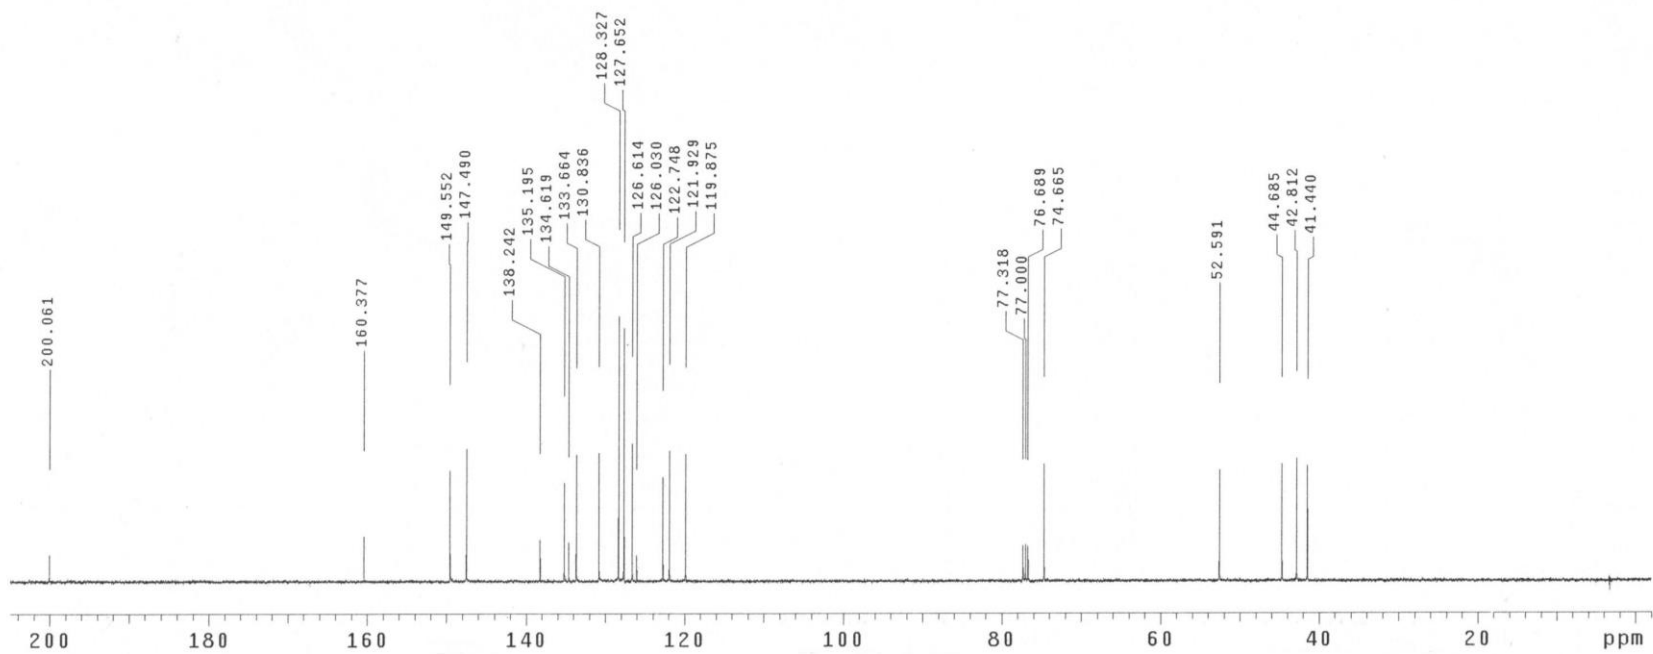

# Compound 6ac (<sup>1</sup>H-NMR spectral data)

MC1080624

Pulse Sequence: s2pu1  
UNITYplus-400 "unity400"  
Date: Jun 25 2019  
Solvent: CDCl<sub>3</sub>  
Ambient temperature  
Total 32 repetitions

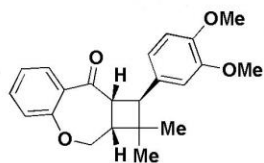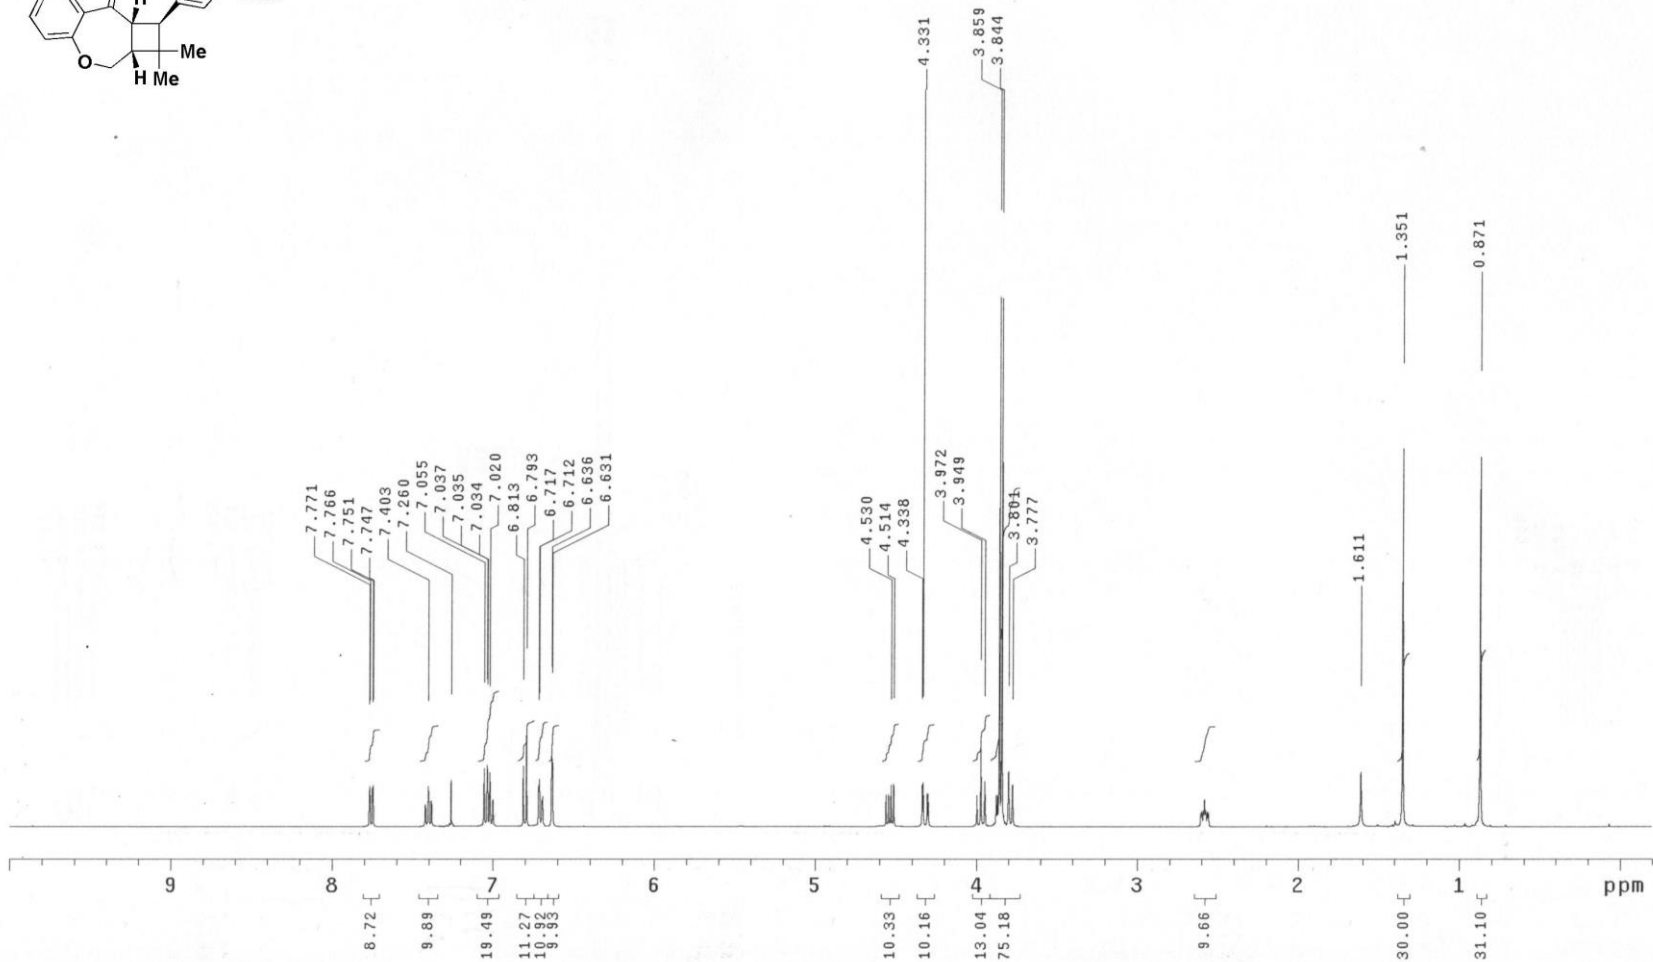

# Compound 6ac (<sup>13</sup>C-NMR spectral data)

MC1080624

Pulse Sequence: s2pu1

UNITYplus-400 "unity400"

Date: Jun 25 2019

Solvent: CDC13

Ambient temperature

Total 2240 repetitions

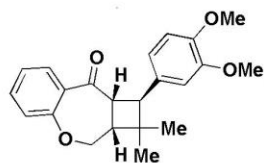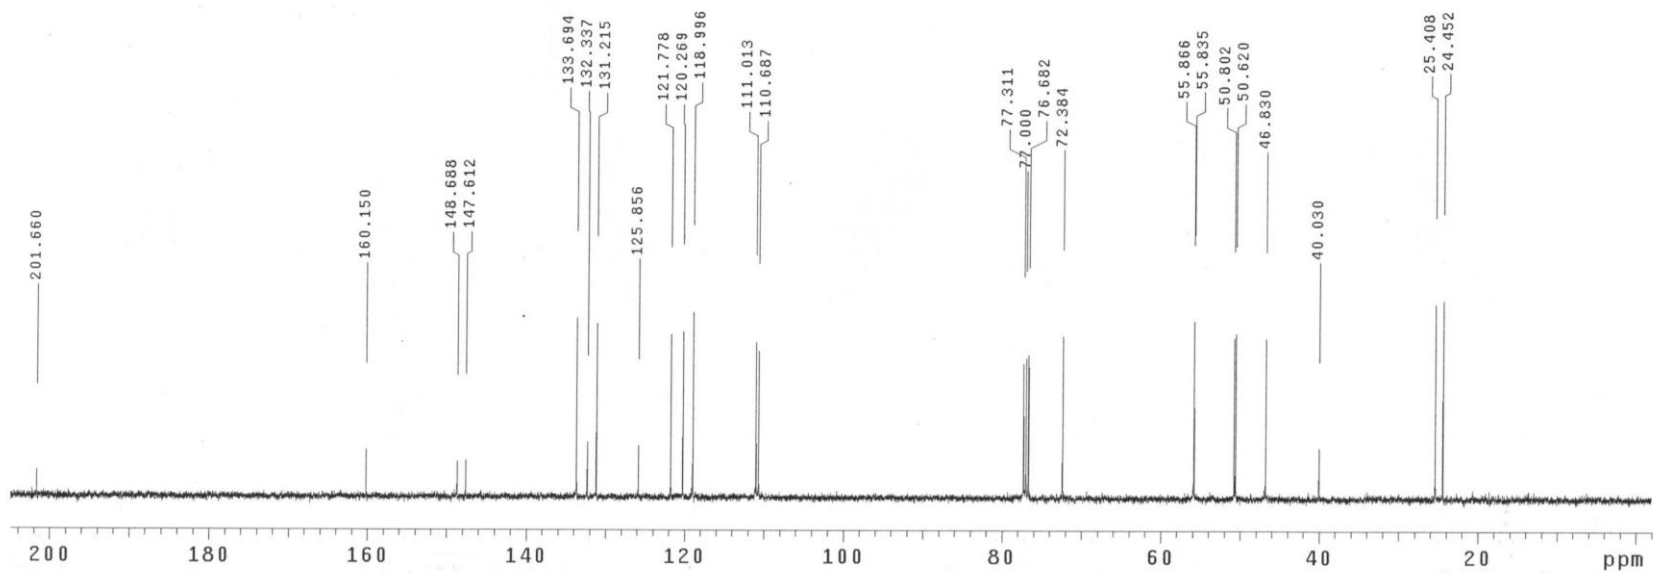

# Compound 6ad (<sup>1</sup>H-NMR spectral data)

MC10806NBS

Pulse Sequence: s2pu1

UNITYplus-400 "unity400"

Date: Jun 27 2019

Solvent: CDCl<sub>3</sub>

Ambient temperature

Total 32 repetitions

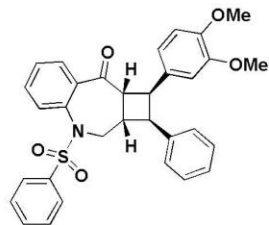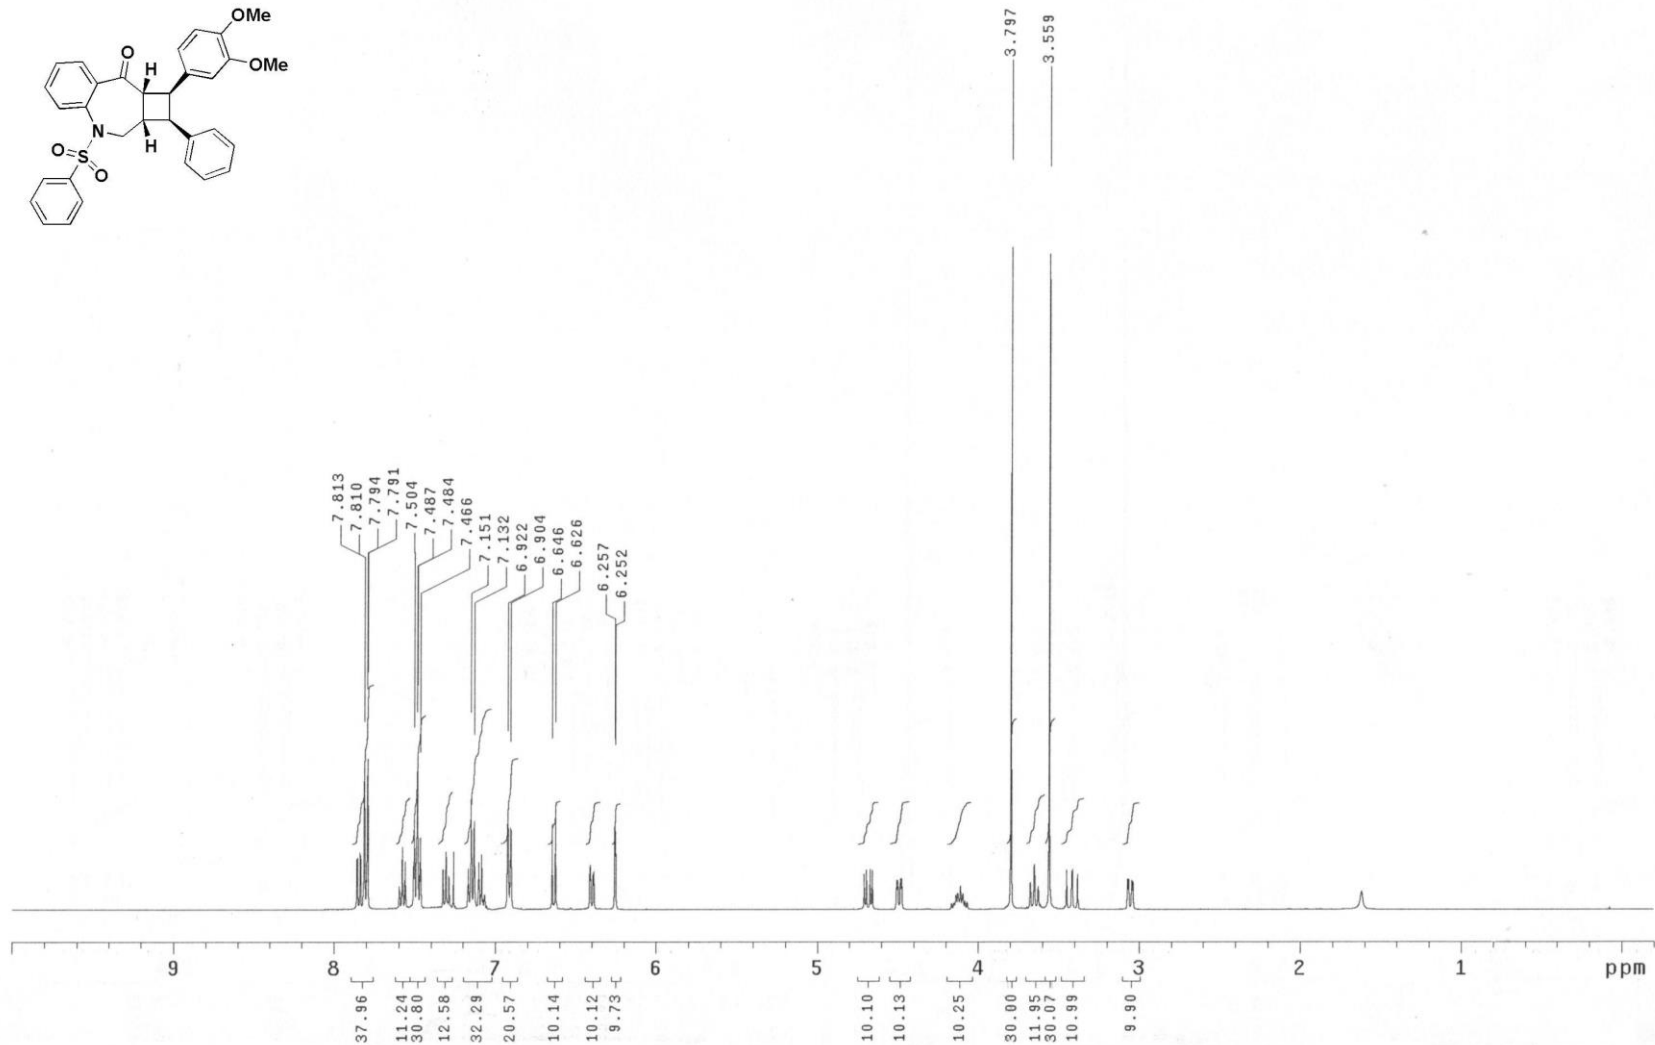

# Compound 6ad (<sup>13</sup>C-NMR spectral data)

MC10806NBS

Pulse Sequence: s2pu1

UNITYplus-400 "unity400"

Date: Jun 27 2019

Solvent: CDC13

Ambient temperature

Total 928 repetitions

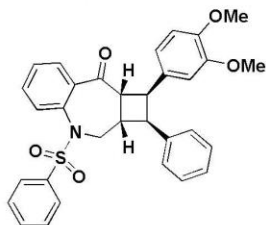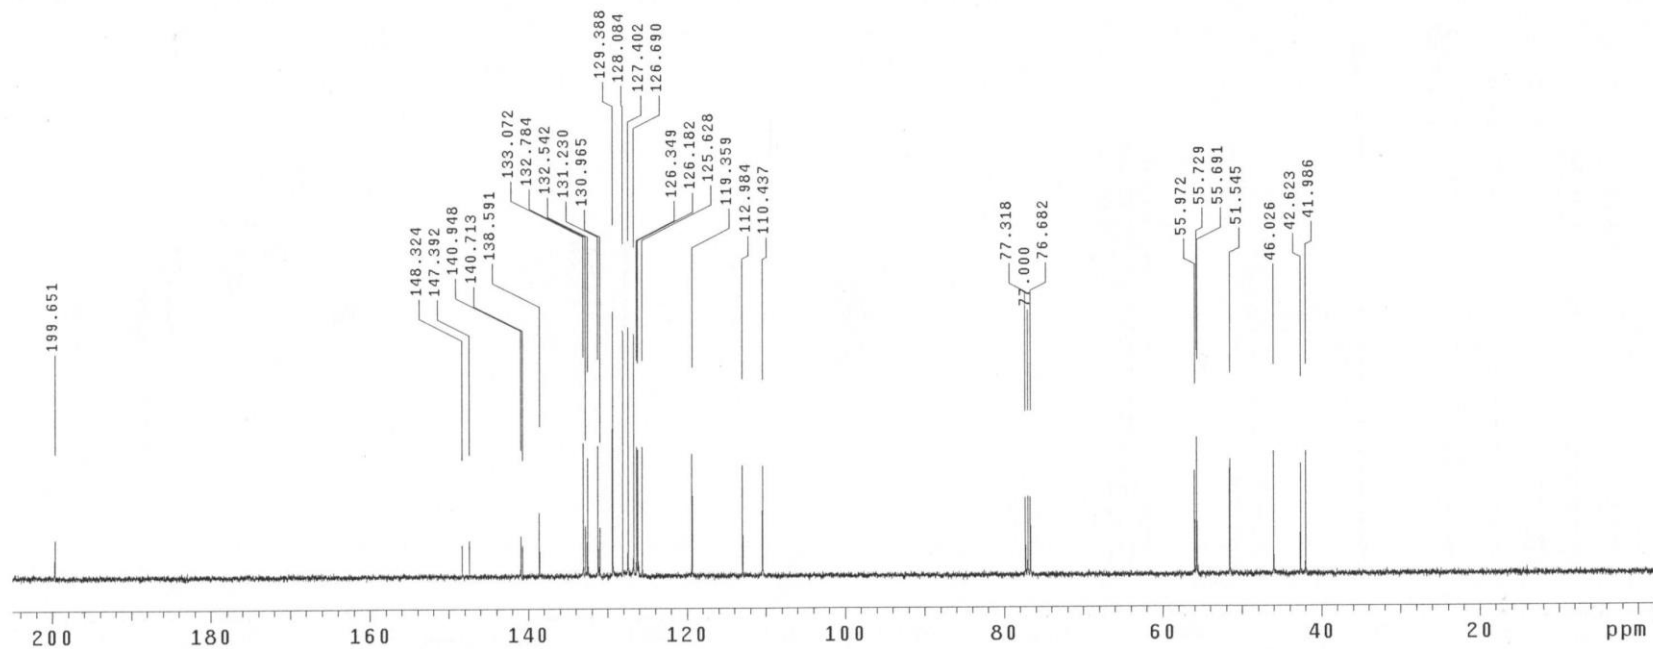

# Compound 7a (<sup>1</sup>H-NMR spectral data)

MC0218DN

Pulse Sequence: s2pu1  
UNITYplus-400 "unity400"  
Date: Feb 20 2019  
Solvent: CDCl<sub>3</sub>  
Ambient temperature  
Total 32 repetitions

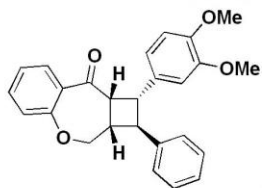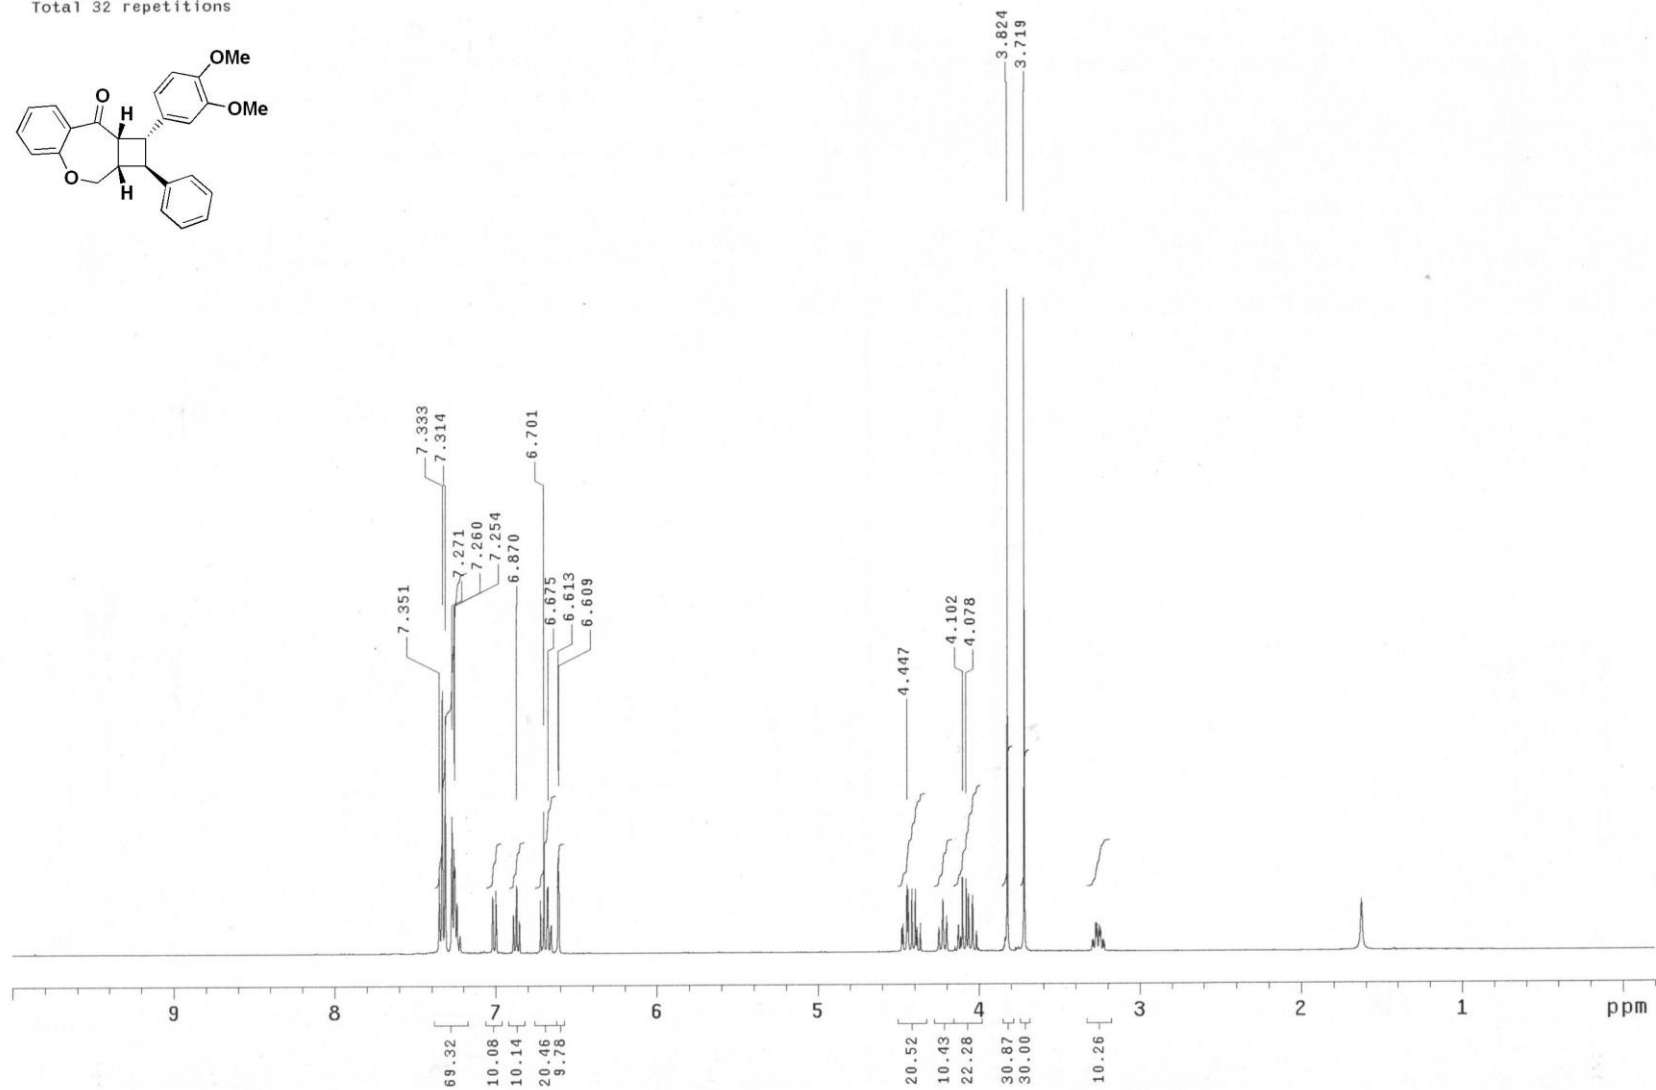



# Compound 7a (<sup>13</sup>C-NMR spectral data)

MC0218DN

Pulse Sequence: s2pu1  
UNITYplus-400 "unity400"  
Date: Feb 20 2019  
Solvent: CDC13  
Ambient temperature  
Total 1232 repetitions

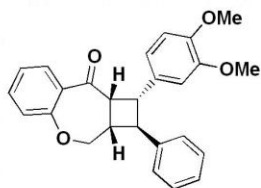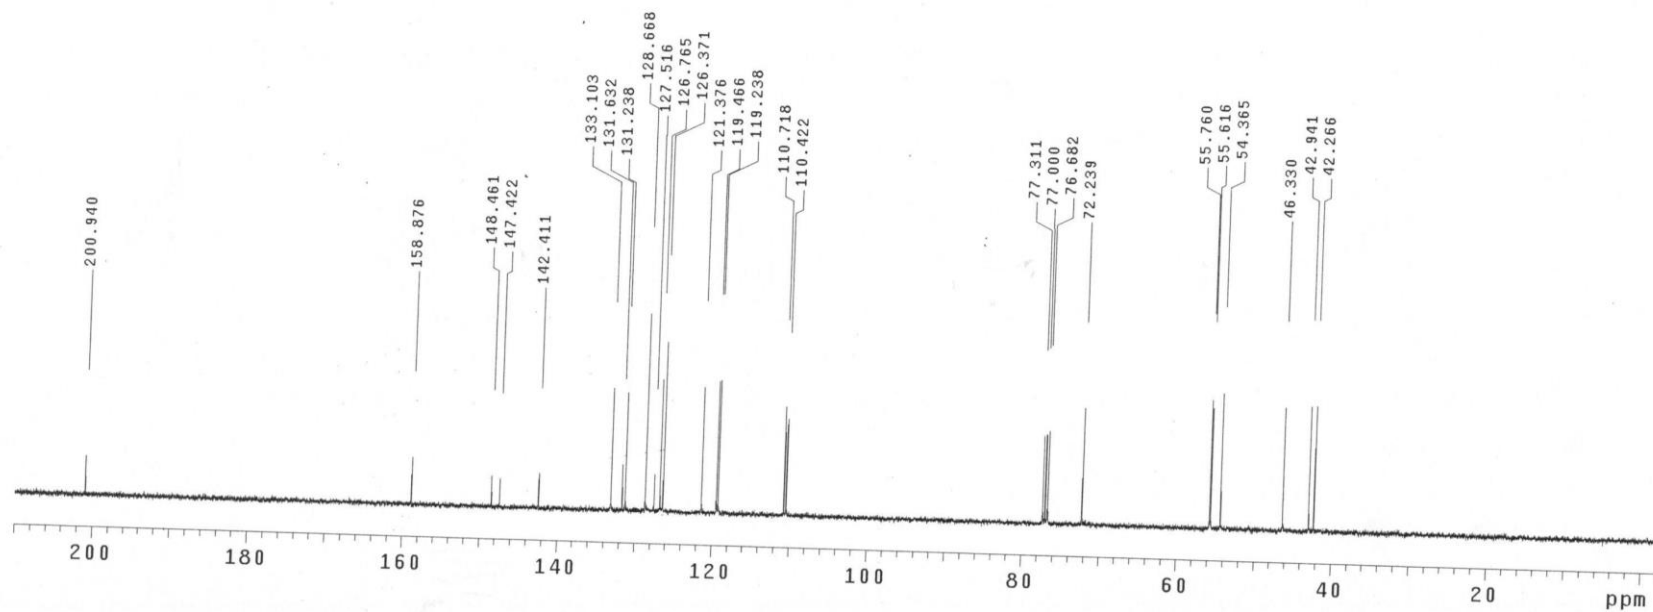

# Compound 7d (<sup>1</sup>H-NMR spectral data)

MC0403DN

Pulse Sequence: s2pu1  
UNITYplus-400 "unity400"  
Date: Apr 9 2019  
Solvent: CDCl<sub>3</sub>  
Ambient temperature  
Total 32 repetitions

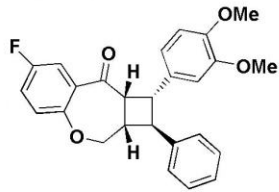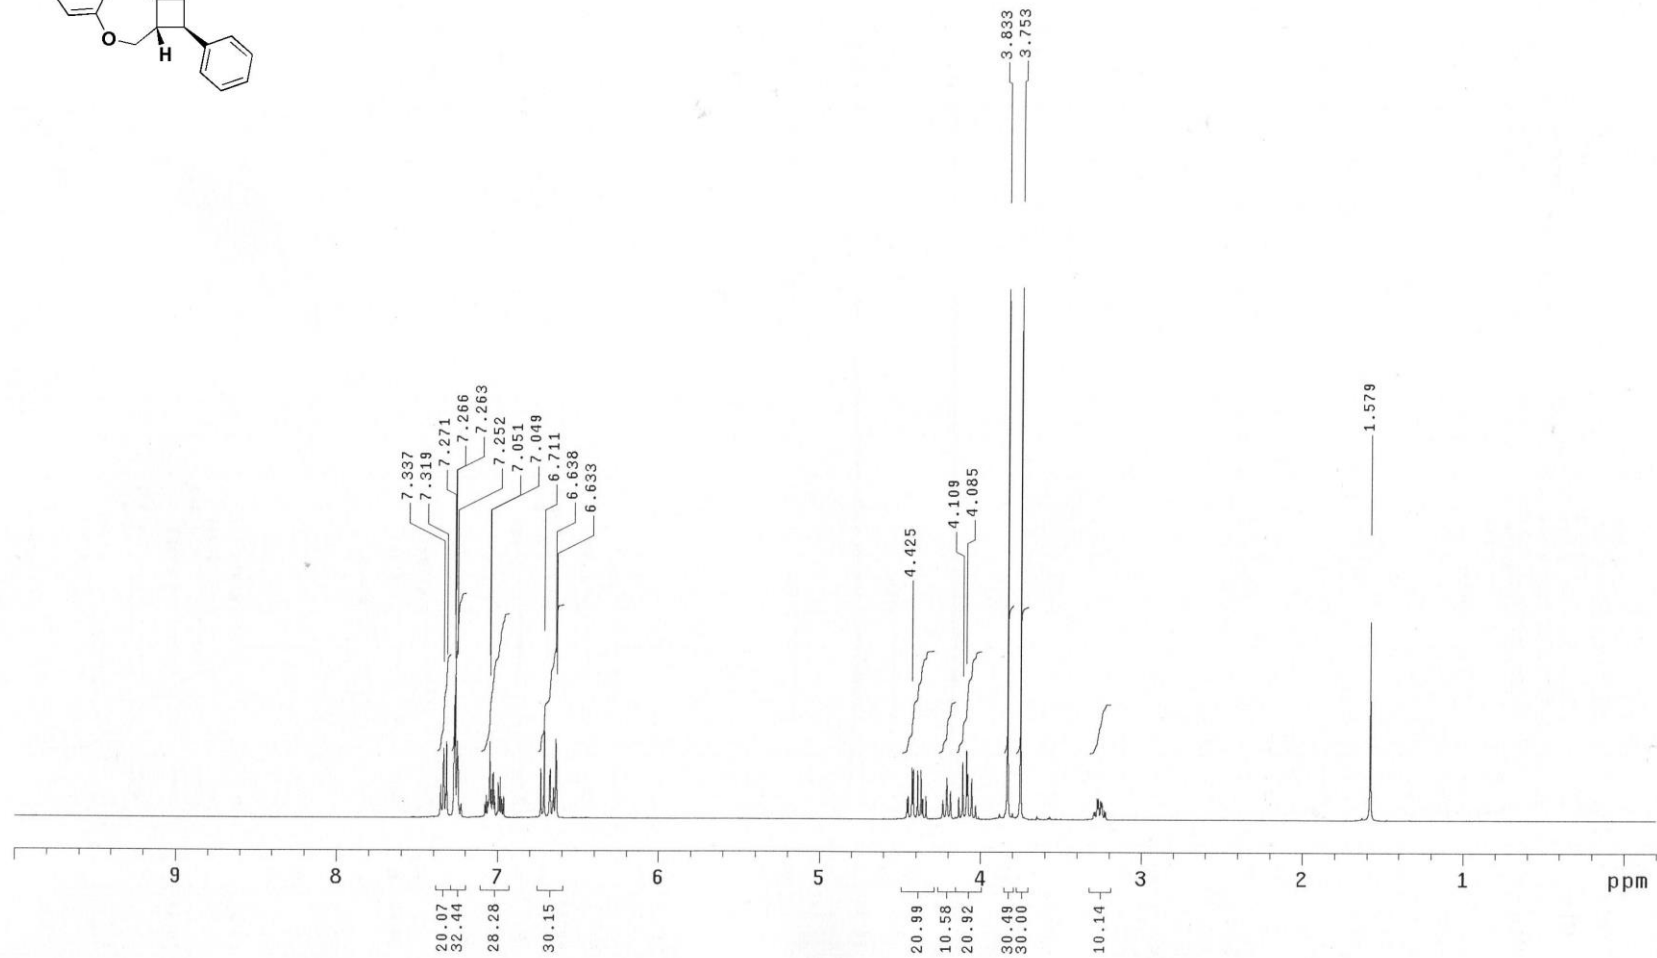

# Compound 7d (<sup>13</sup>C-NMR spectral data)

MC0403DN

Pulse Sequence: s2pu1  
UNITYplus-400 "unity400"  
Date: Apr 9 2019  
Solvent: CDCl<sub>3</sub>  
Ambient temperature  
Total 3360 repetitions

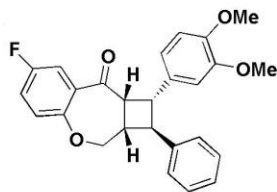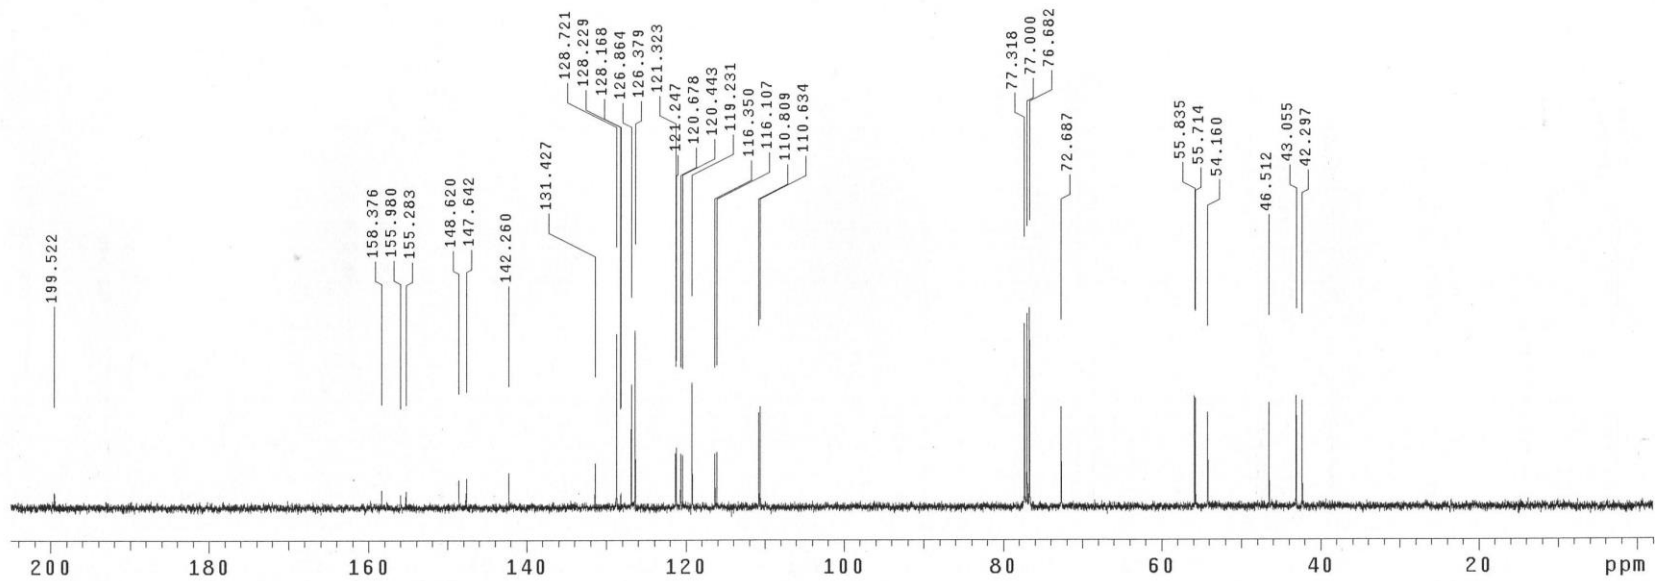

# Compound 7e (<sup>1</sup>H-NMR spectral data)

MC0319DN

Pulse Sequence: s2pu1

UNITYplus-400 "unity400"

Date: Mar 20 2019

Solvent: CDCl<sub>3</sub>

Ambient temperature

Total 32 repetitions

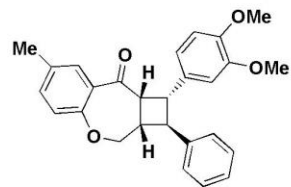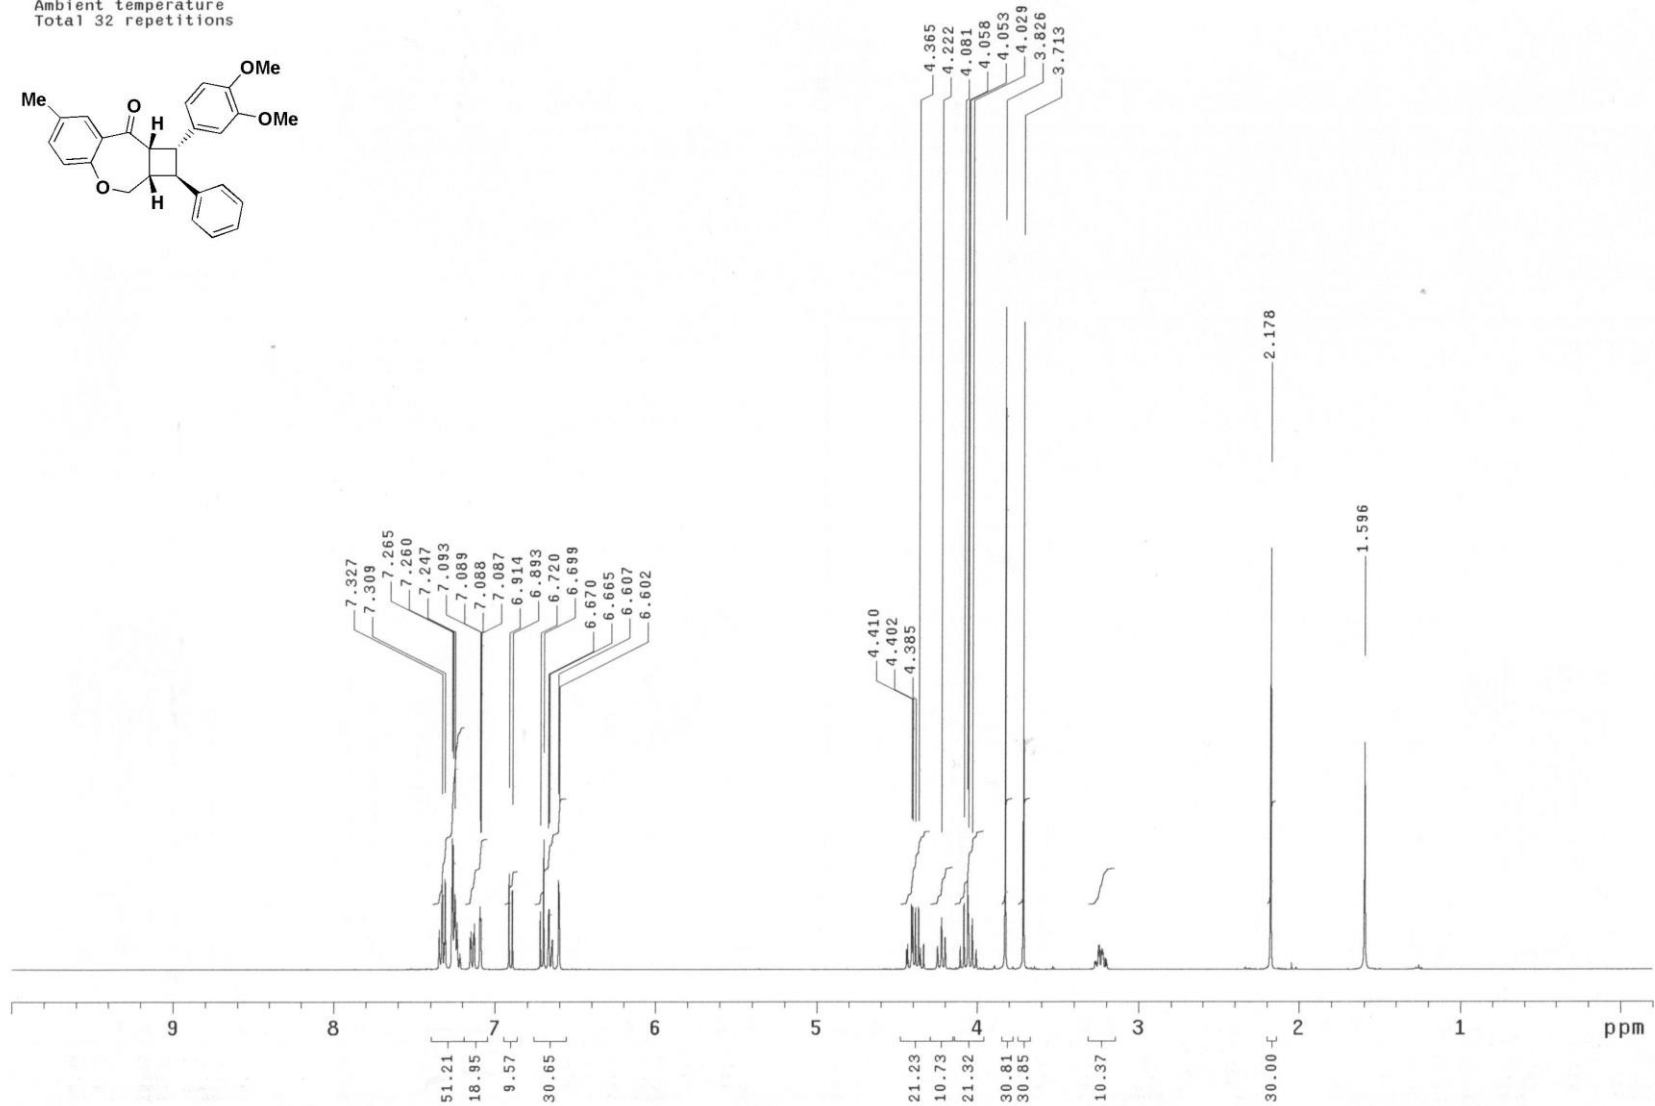

# Compound 7e (<sup>13</sup>C-NMR spectral data)

MC0319DN

Pulse Sequence: s2pu1

UNITYplus-400 "unity400"

Date: Mar 20 2019

Solvent: CDCl<sub>3</sub>

Ambient temperature

Total 1600 repetitions

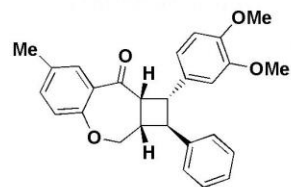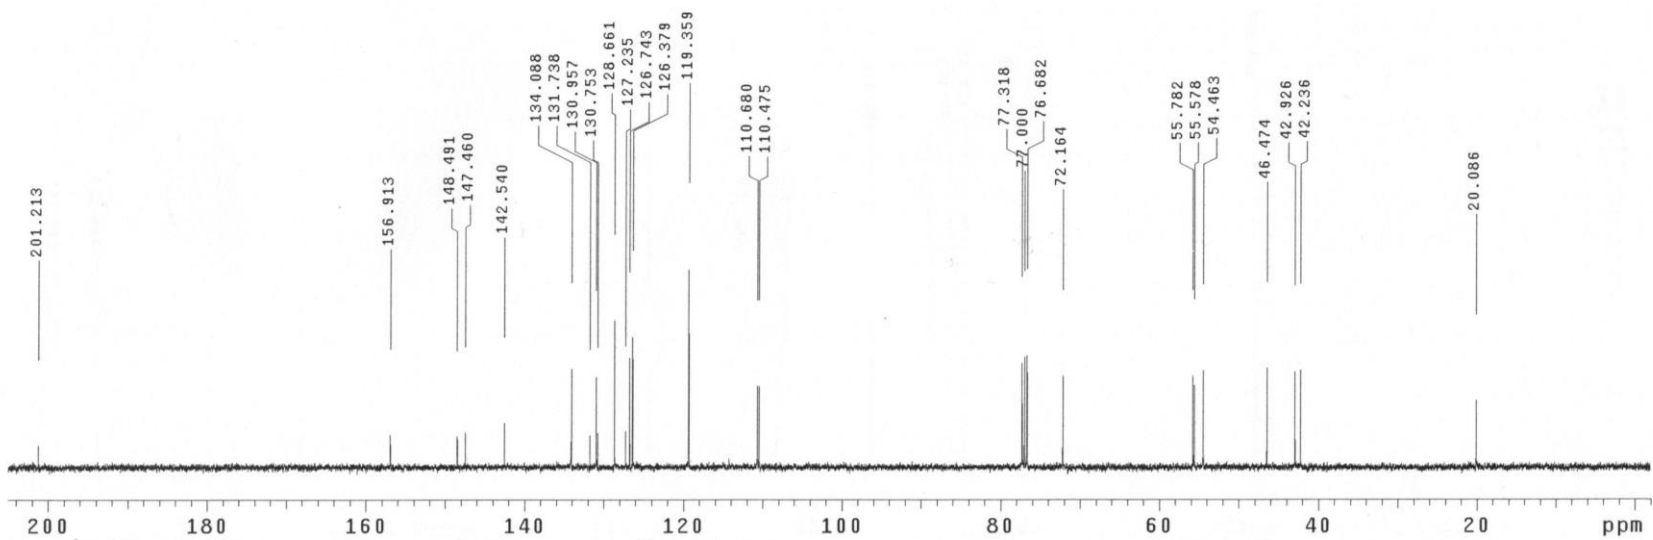

# Compound 7f (<sup>1</sup>H-NMR spectral data)

MC0314DN

Pulse Sequence: s2pu1

UNITYplus-400 "unity400"

Date: Mar 15 2019

Solvent: CDCl<sub>3</sub>

Ambient temperature

Total 32 repetitions

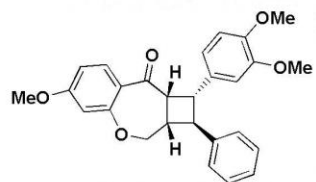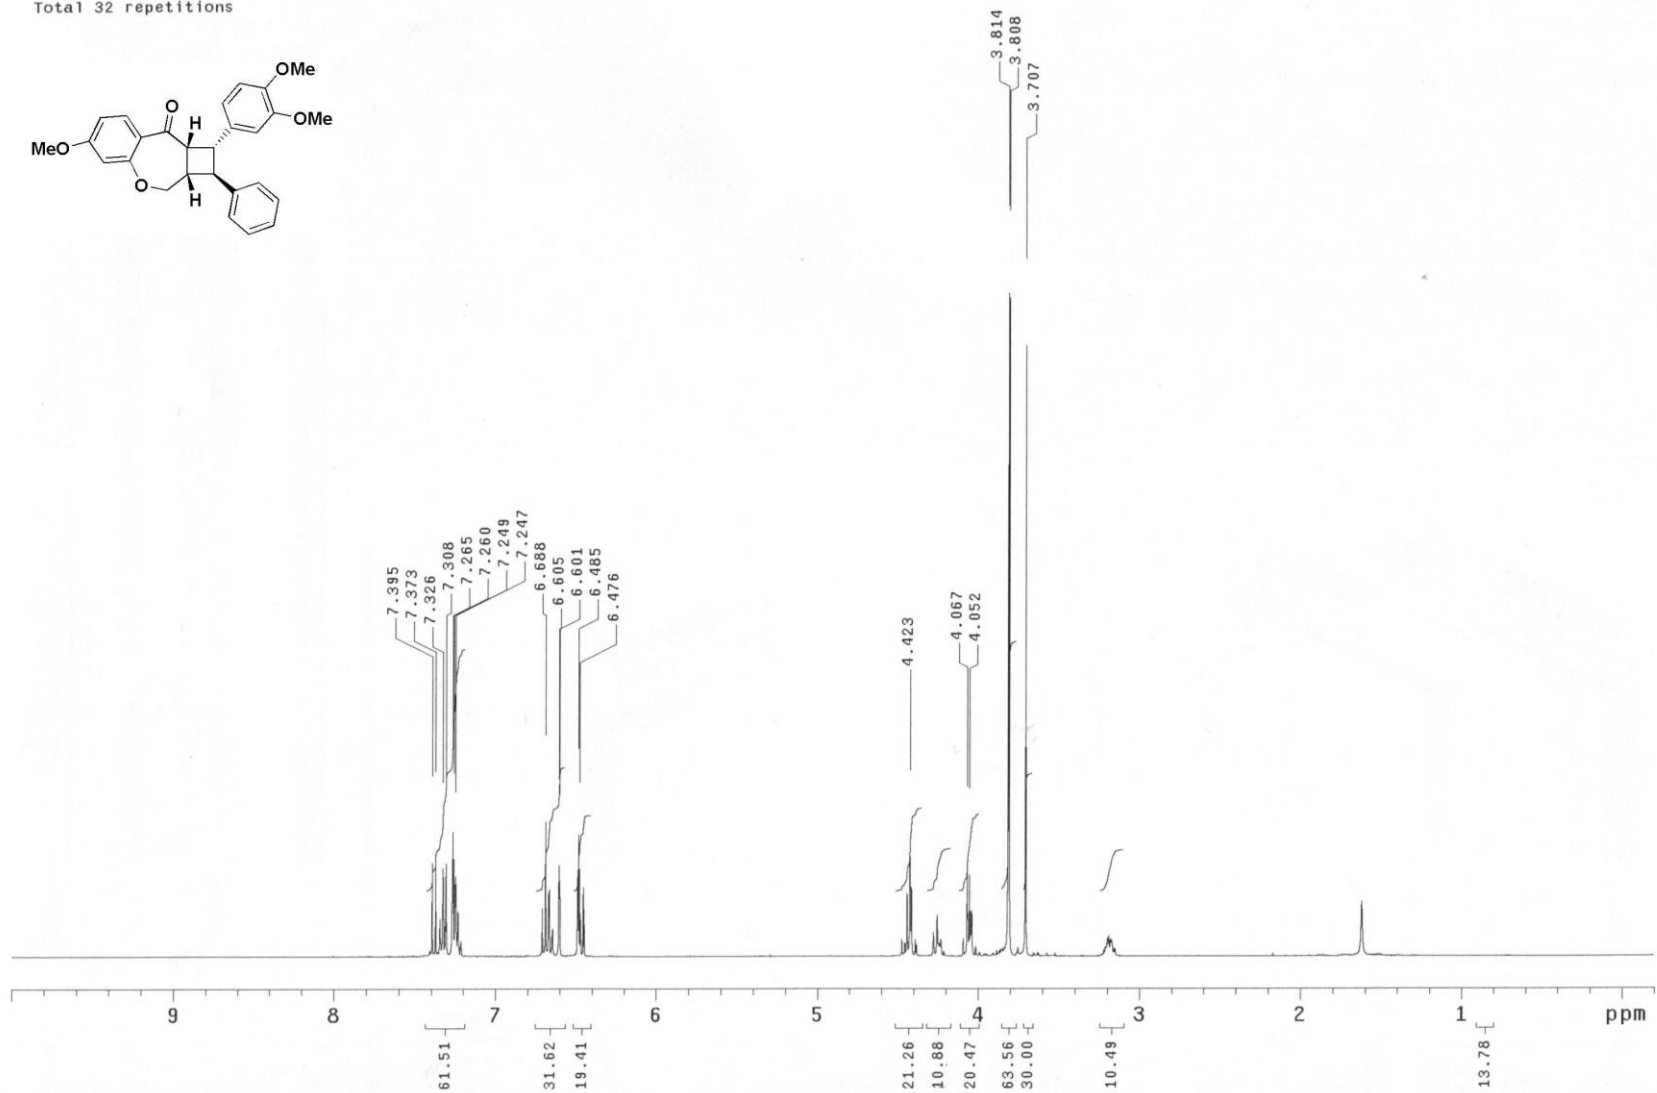

# Compound 7f (<sup>13</sup>C-NMR spectral data)

MC0314DN

Pulse Sequence: s2pu1

UNITYplus-400 "unity400"

Date: Mar 15 2019

Solvent: CDCl<sub>3</sub>

Ambient temperature

Total 1152 repetitions

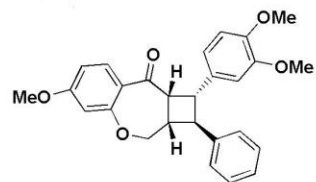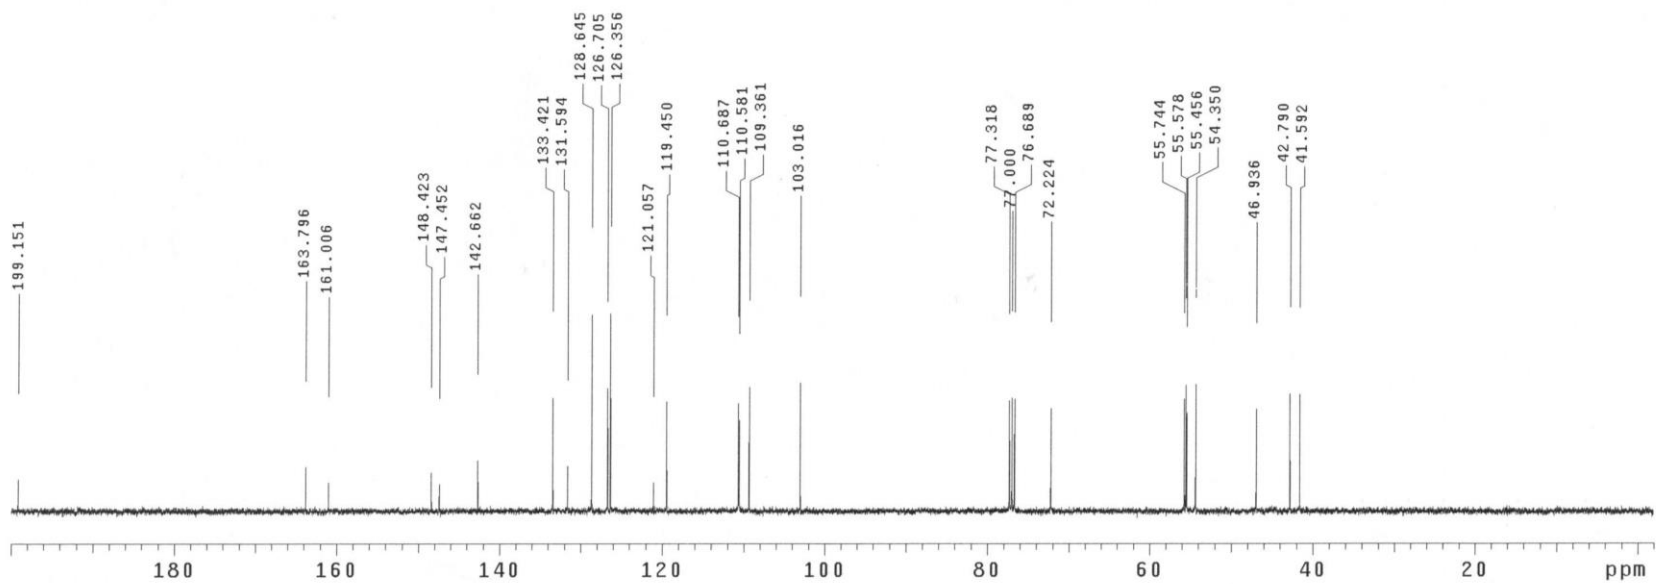

# Compound 7h (<sup>1</sup>H-NMR spectral data)

MC0426DN

Pulse Sequence: s2pu1  
UNITYplus-400 "unity400"  
Date: Apr 26 2019  
Solvent: CDC13  
Ambient temperature  
Total 32 repetitions

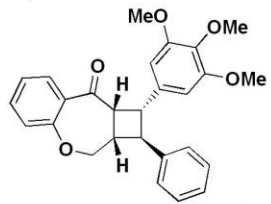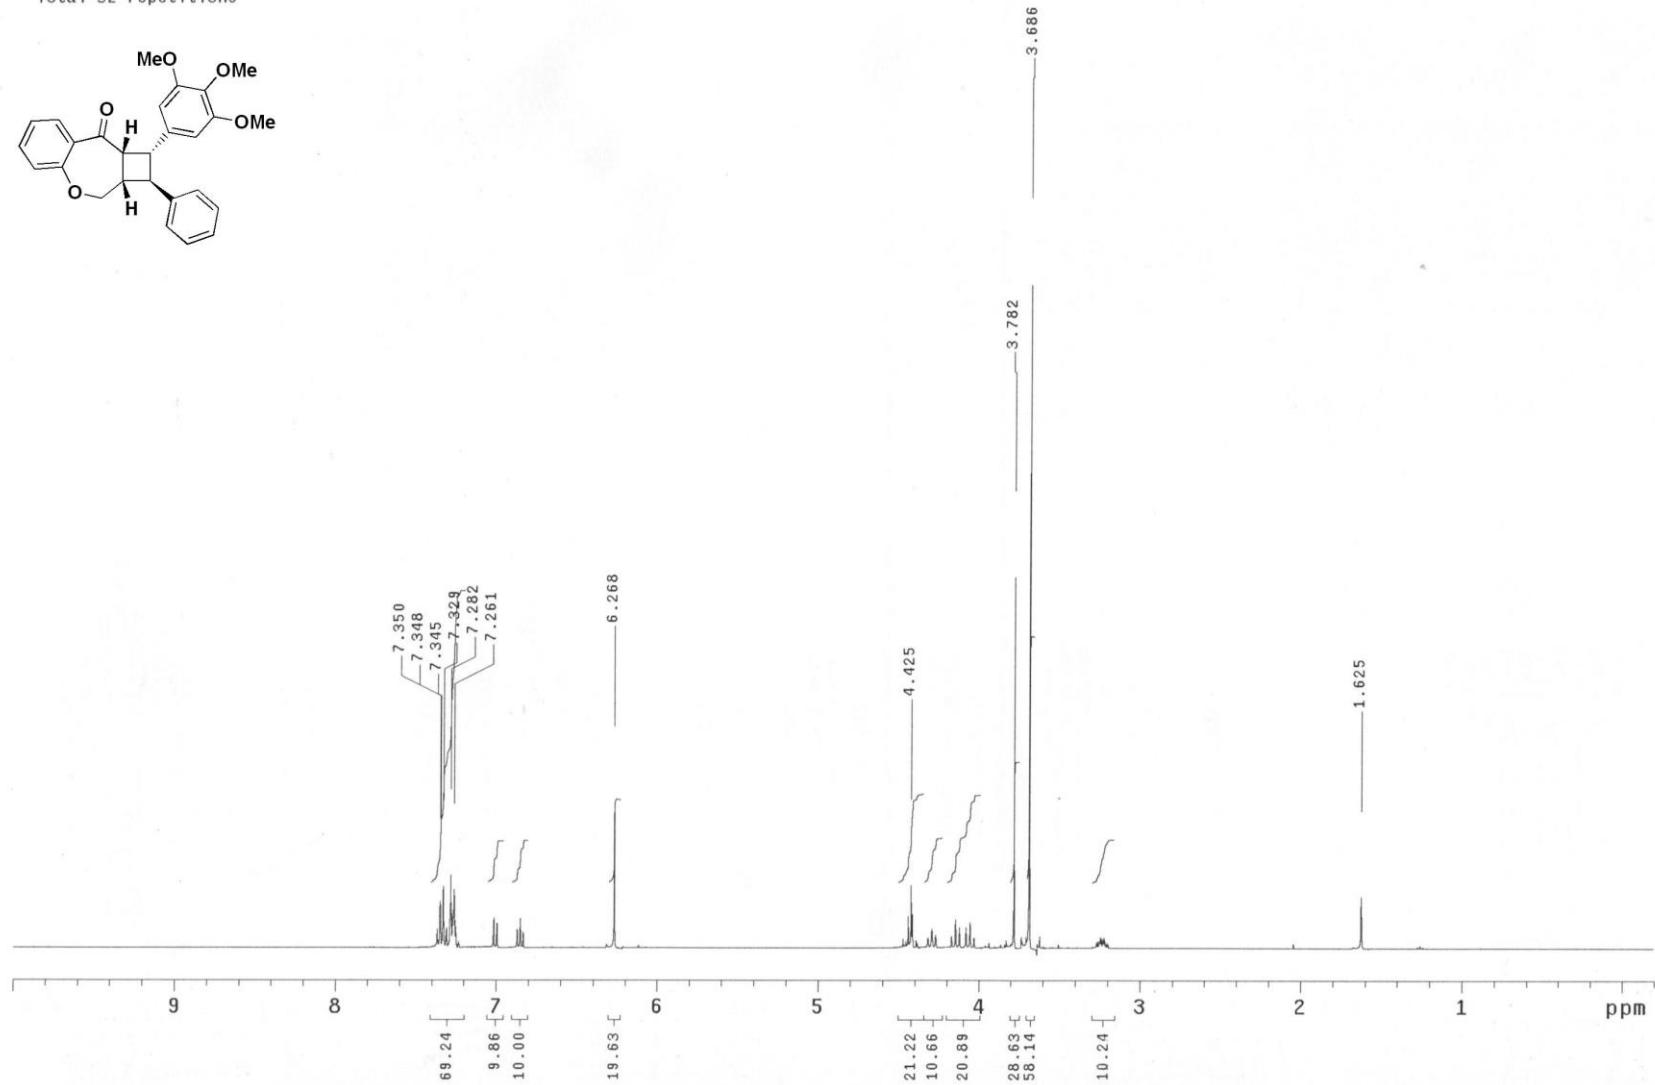



# Compound 7h (<sup>13</sup>C-NMR spectral data)

MC0426DN

Pulse Sequence: s2pu1  
UNITYplus-400 "unity400"  
Date: Apr 26 2019  
Solvent: CDC13  
Ambient temperature  
Total 2016 repetitions

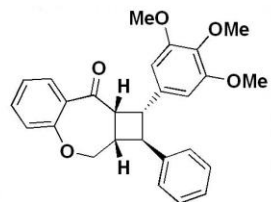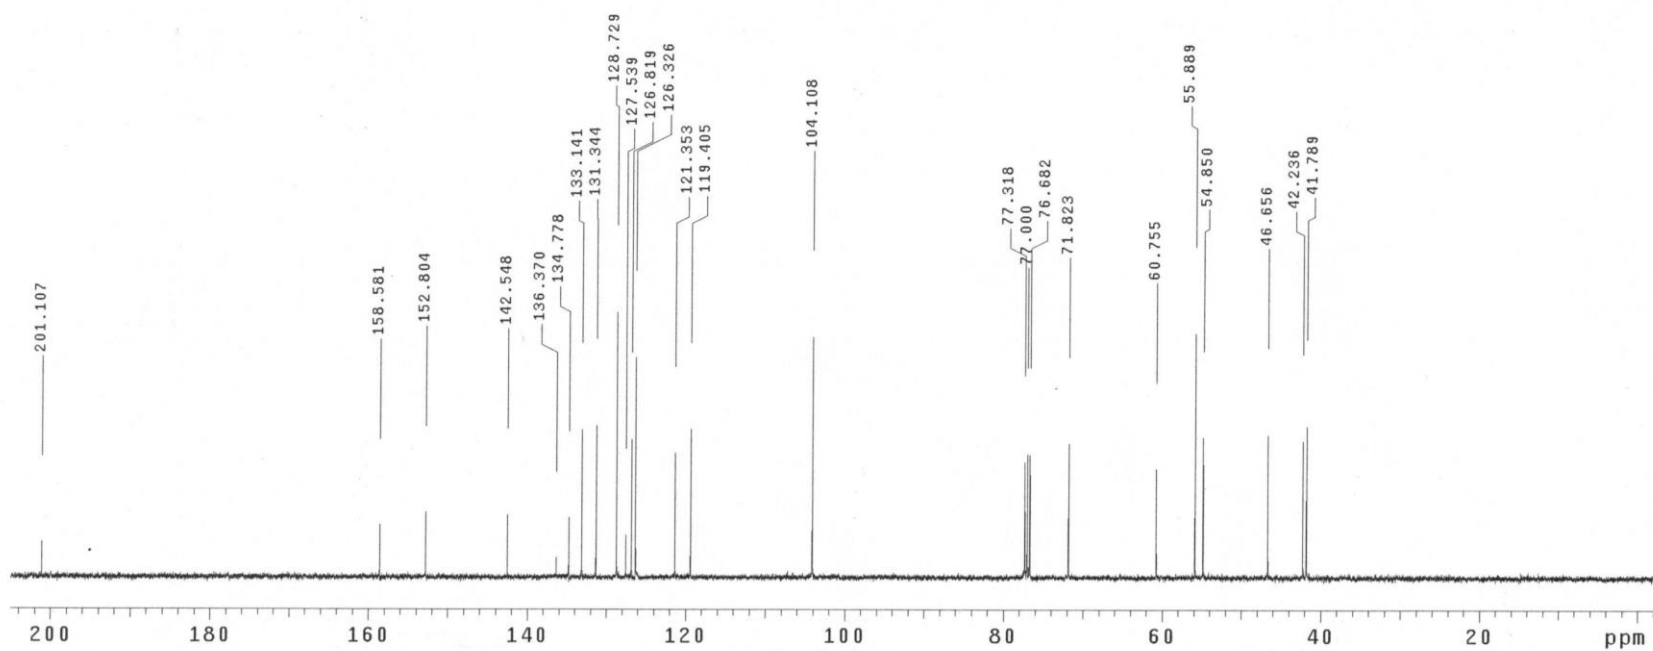

# Compound 7j (<sup>1</sup>H-NMR spectral data)

MC0627DN

Pulse Sequence: s2pu1  
UNITYplus-400 "unity400"  
Date: Jun 27 2019  
Solvent: CDCl<sub>3</sub>  
Ambient temperature  
Total 32 repetitions

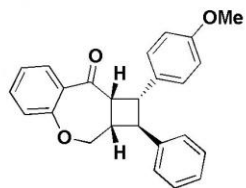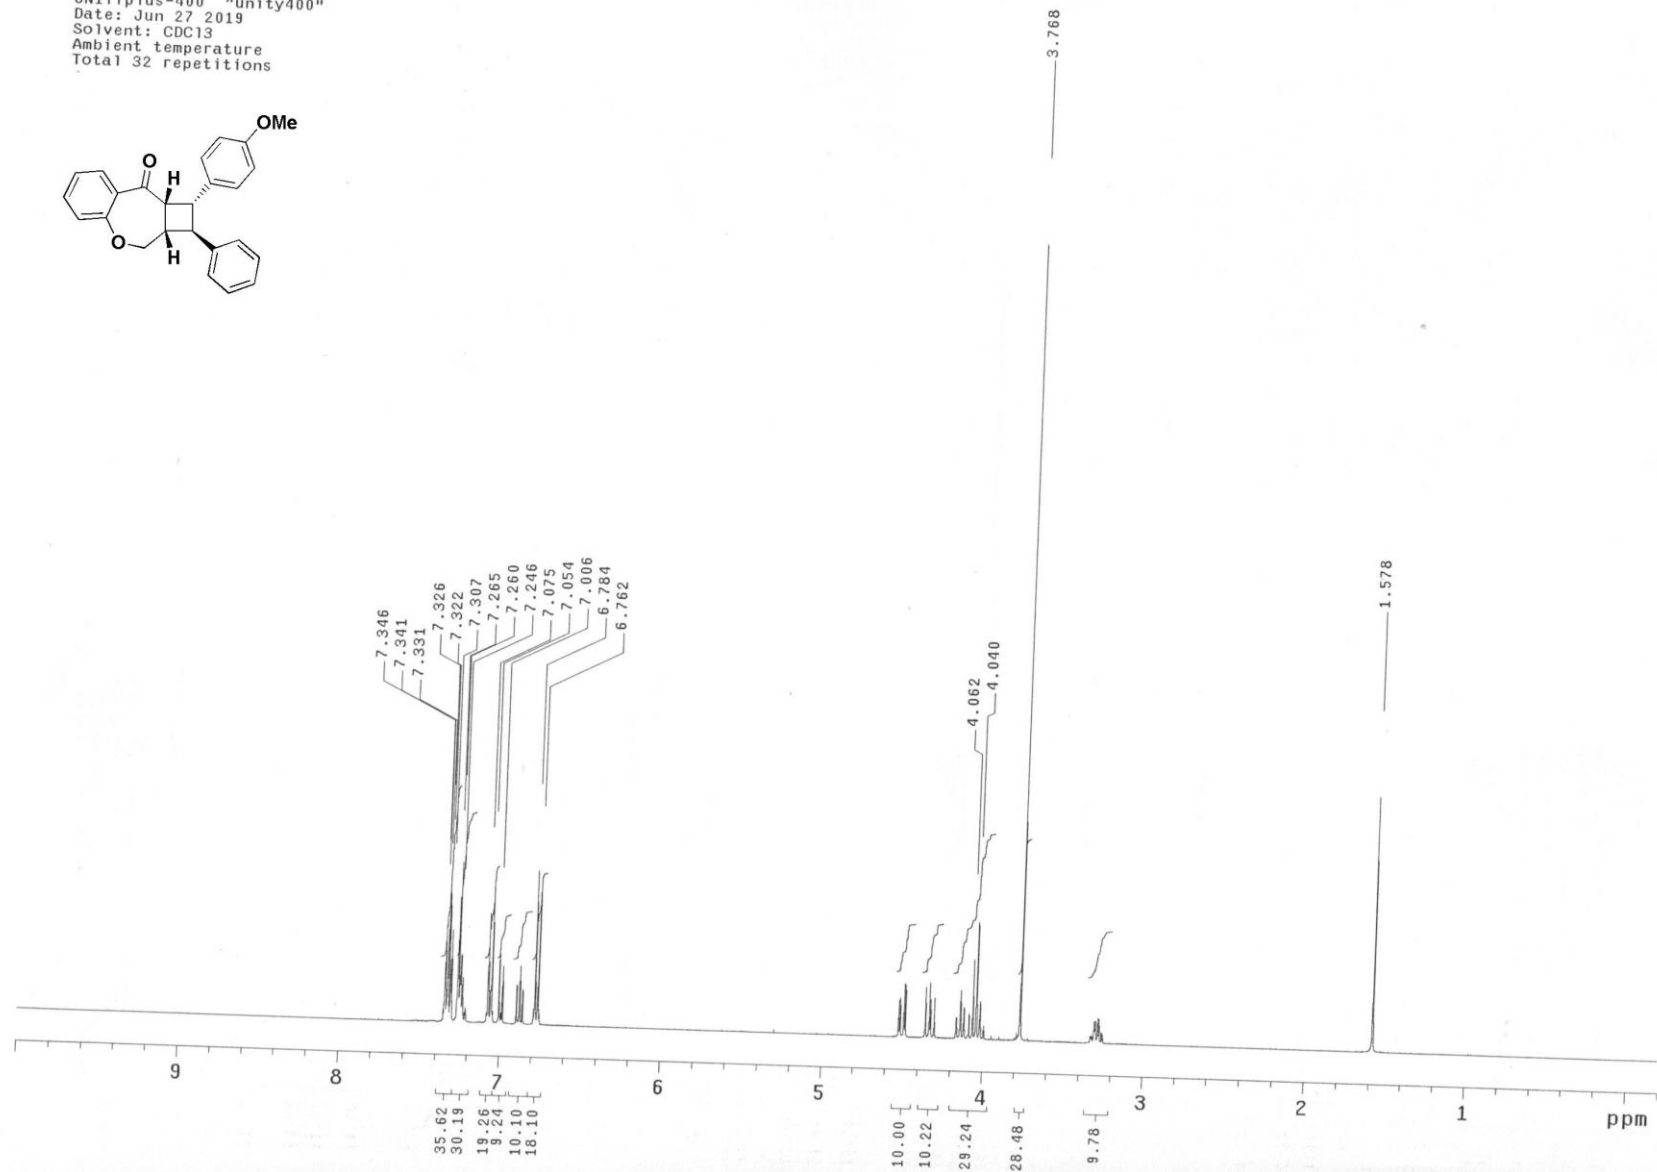

# Compound 7j (<sup>13</sup>C-NMR spectral data)

MC0627DN

Pulse Sequence: s2pu1  
UNITYplus-400 "unity400"  
Date: Jun 27 2019  
Solvent: CDC13  
Ambient temperature  
Total 2144 repetitions

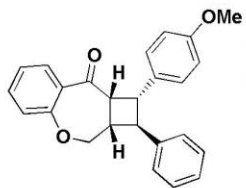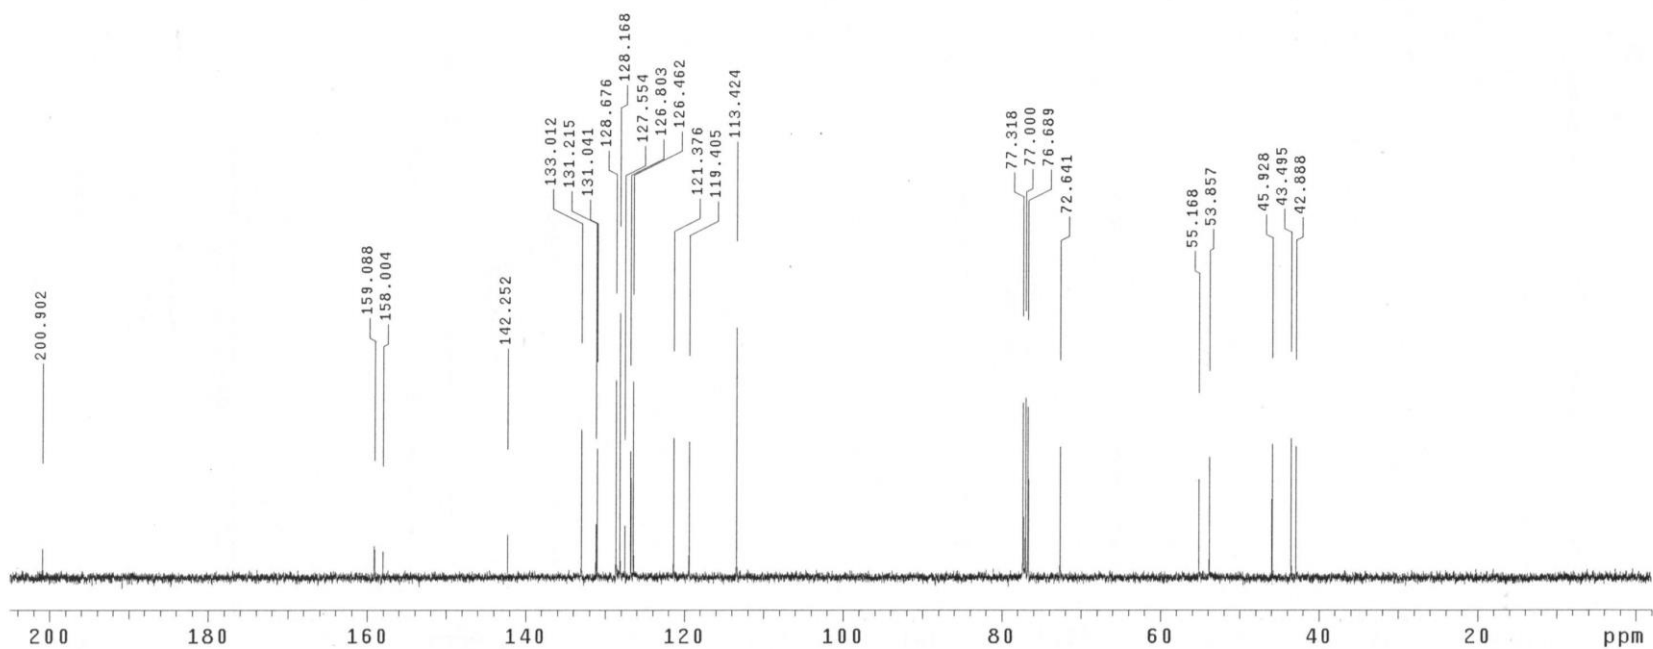

# Compound 7m (<sup>1</sup>H-NMR spectral data)

MC0506DN

Pulse Sequence: s2pu1  
UNITYplus-400 "unity400"  
Date: May 7 2019  
Solvent: CDCl<sub>3</sub>  
Ambient temperature  
Total 32 repetitions

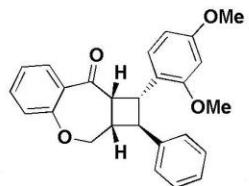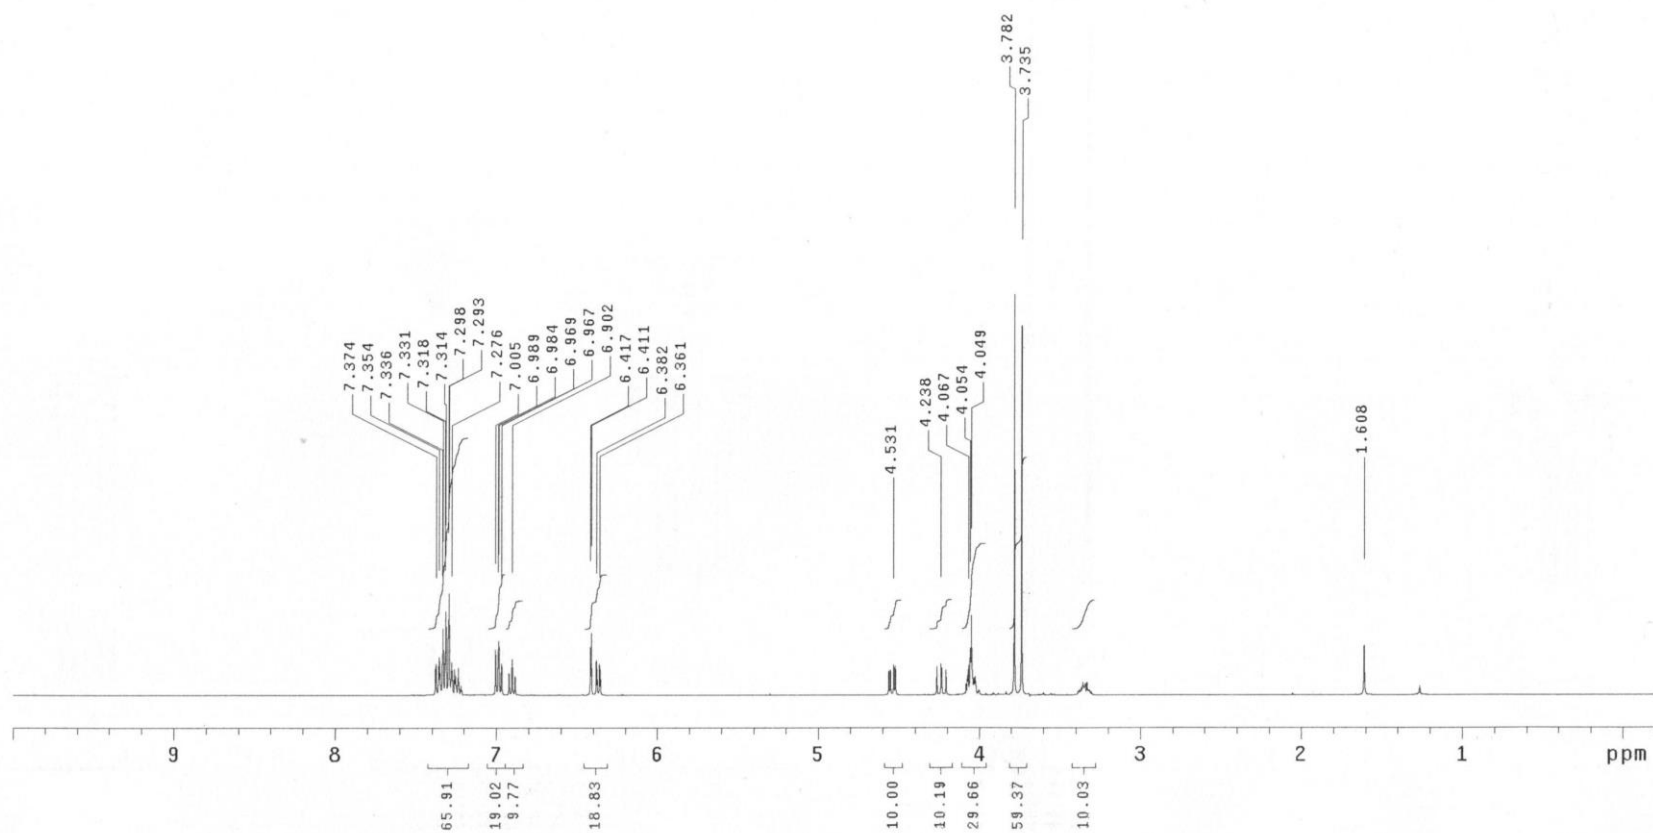

# Compound 7m (<sup>13</sup>C-NMR spectral data)

MC0506DN

Pulse Sequence: s2pu1  
UNITYplus-400 "unity400"  
Date: May 7 2019  
Solvent: CDCl<sub>3</sub>  
Ambient temperature  
Total 1632 repetitions

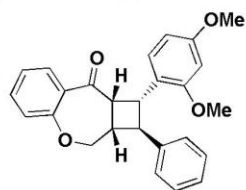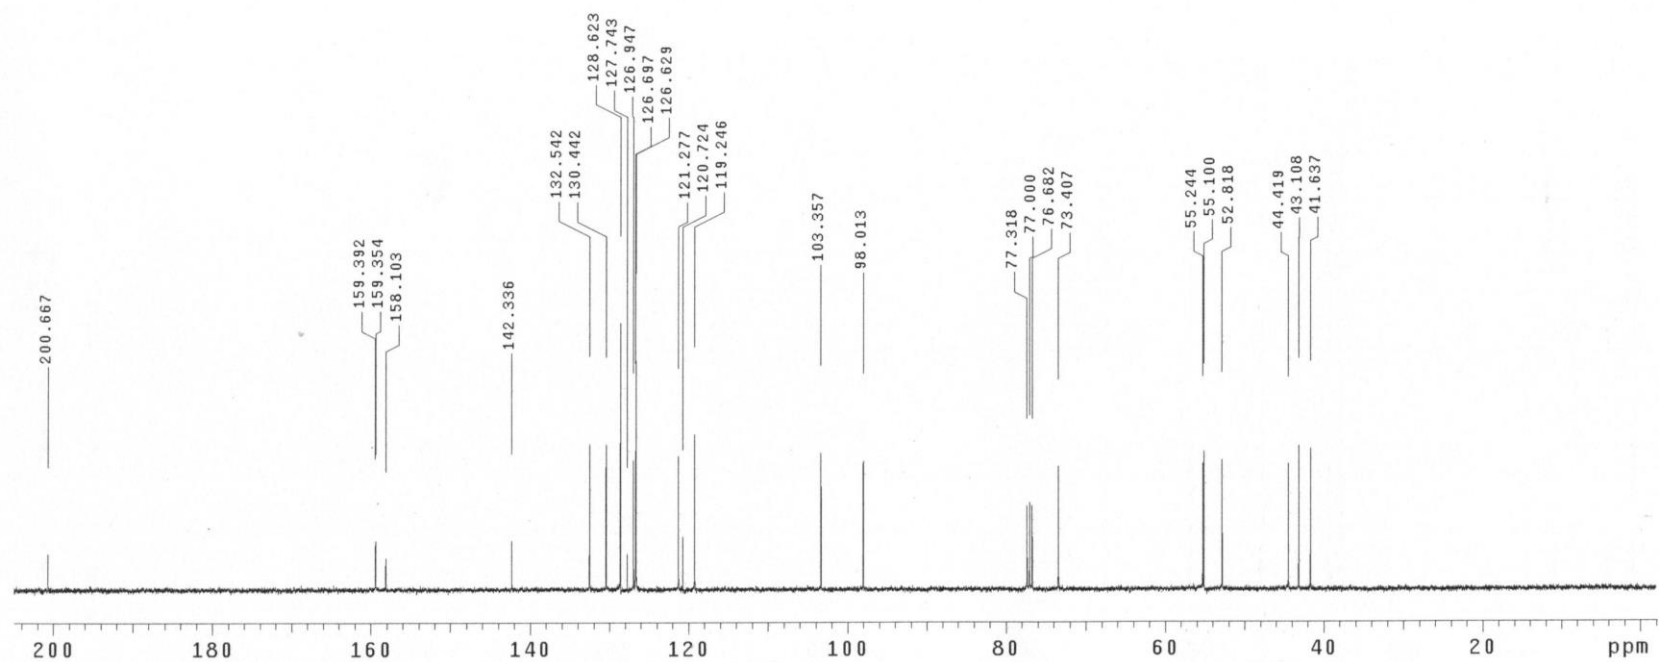

# Compound 7o (<sup>1</sup>H-NMR spectral data)

MC0430DN

Pulse Sequence: s2pu1

UNITYplus-400 "unity400"

Date: May 31 2019

Solvent: CDCl<sub>3</sub>

Ambient temperature

Total 32 repetitions

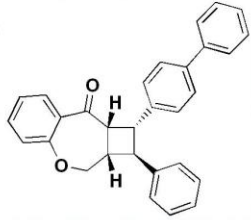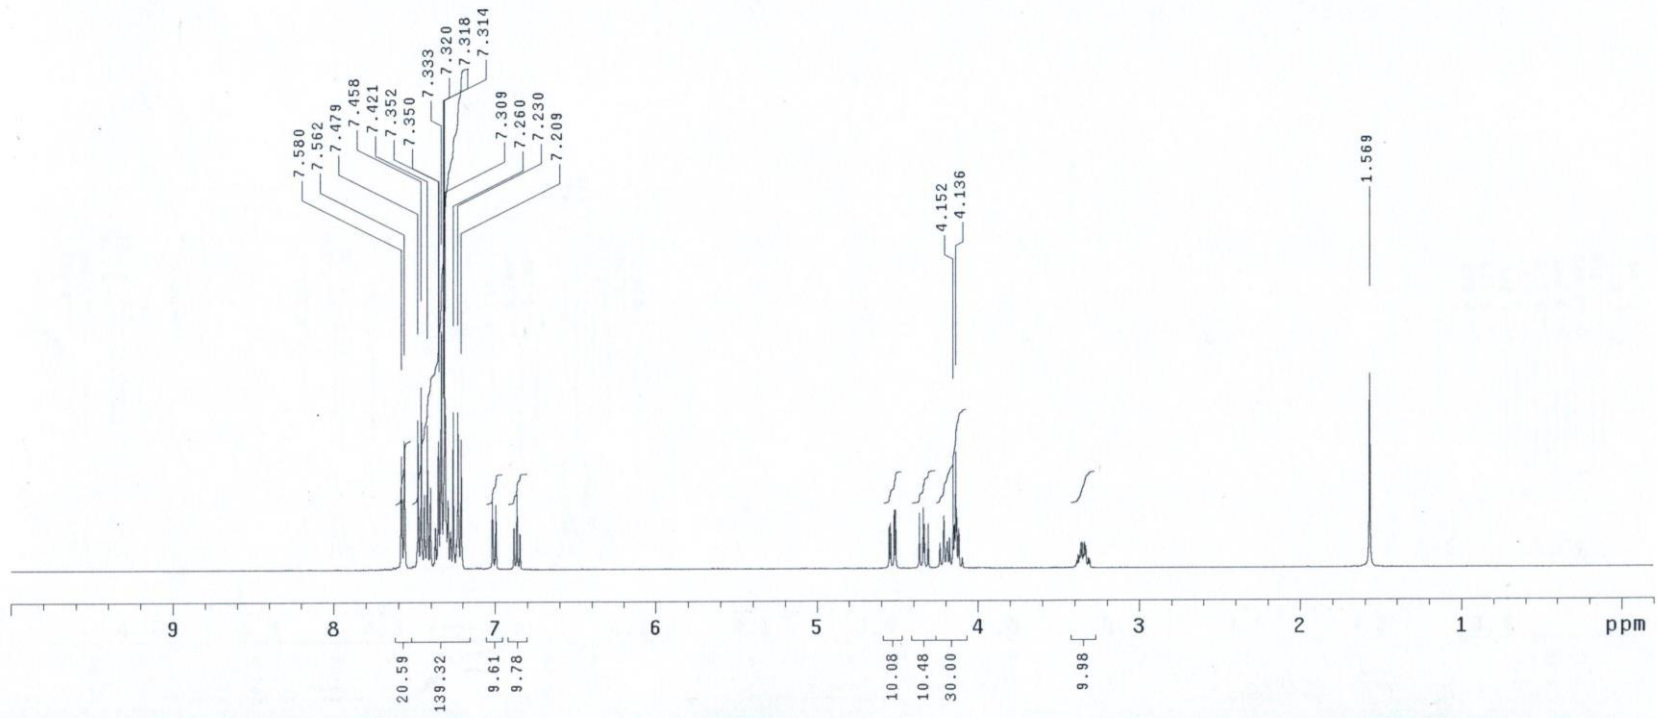

# Compound 7o (<sup>13</sup>C-NMR spectral data)

MC0430DN

Pulse Sequence: s2pu1  
UNITYplus-400 "unity400"  
Date: May 31 2019  
Solvent: CDCl<sub>3</sub>  
Ambient temperature  
Total 10016 repetitions

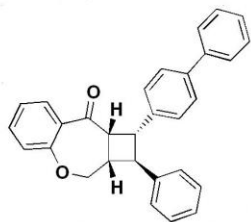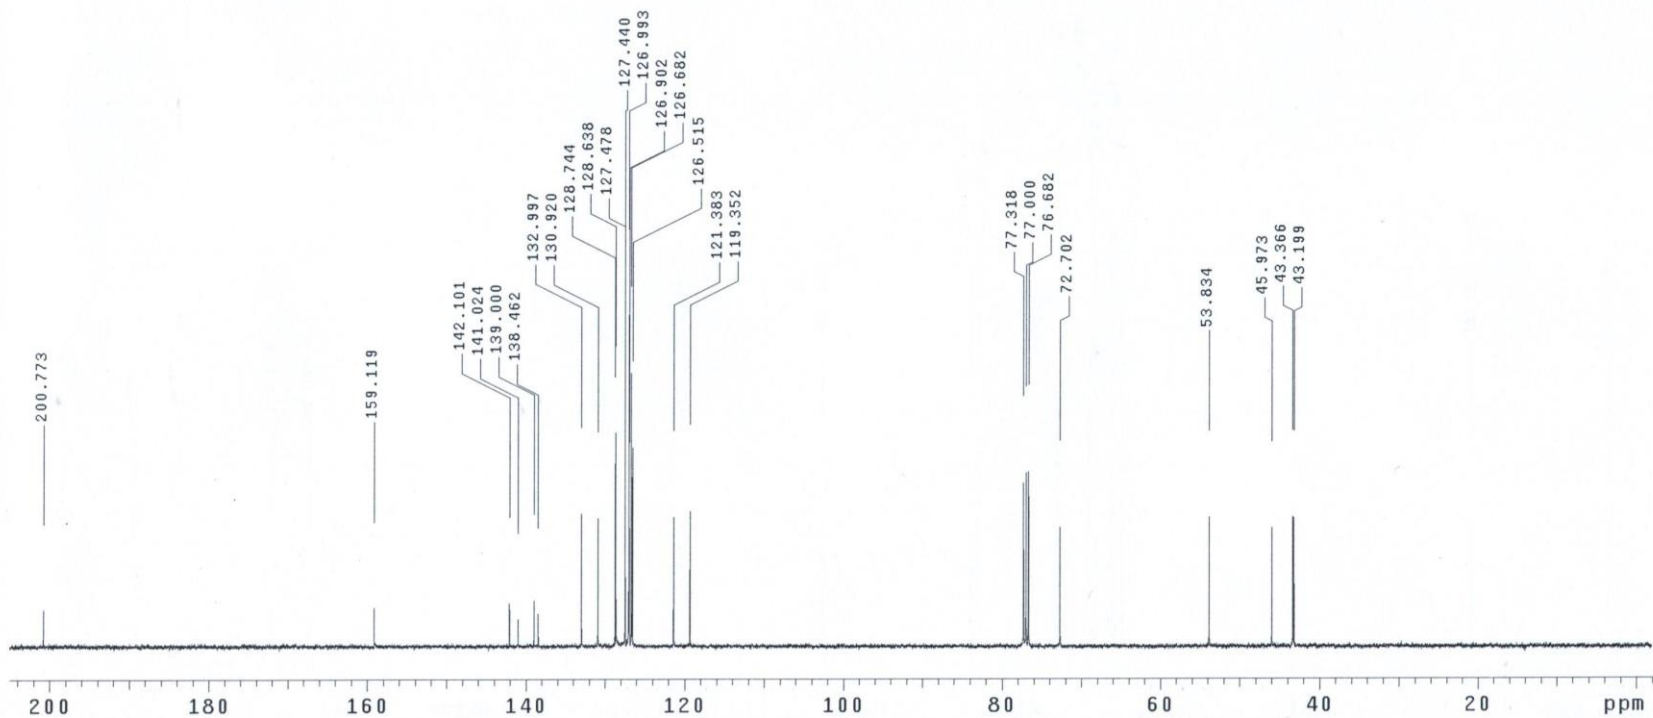

# Compound 7q (<sup>1</sup>H-NMR spectral data)

MC0515DN

Pulse Sequence: s2pu1  
UNITYplus-400 "unity400"  
Date: May 20 2019  
Solvent: CDCl<sub>3</sub>  
Ambient temperature  
Total 64 repetitions

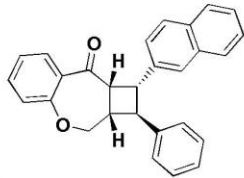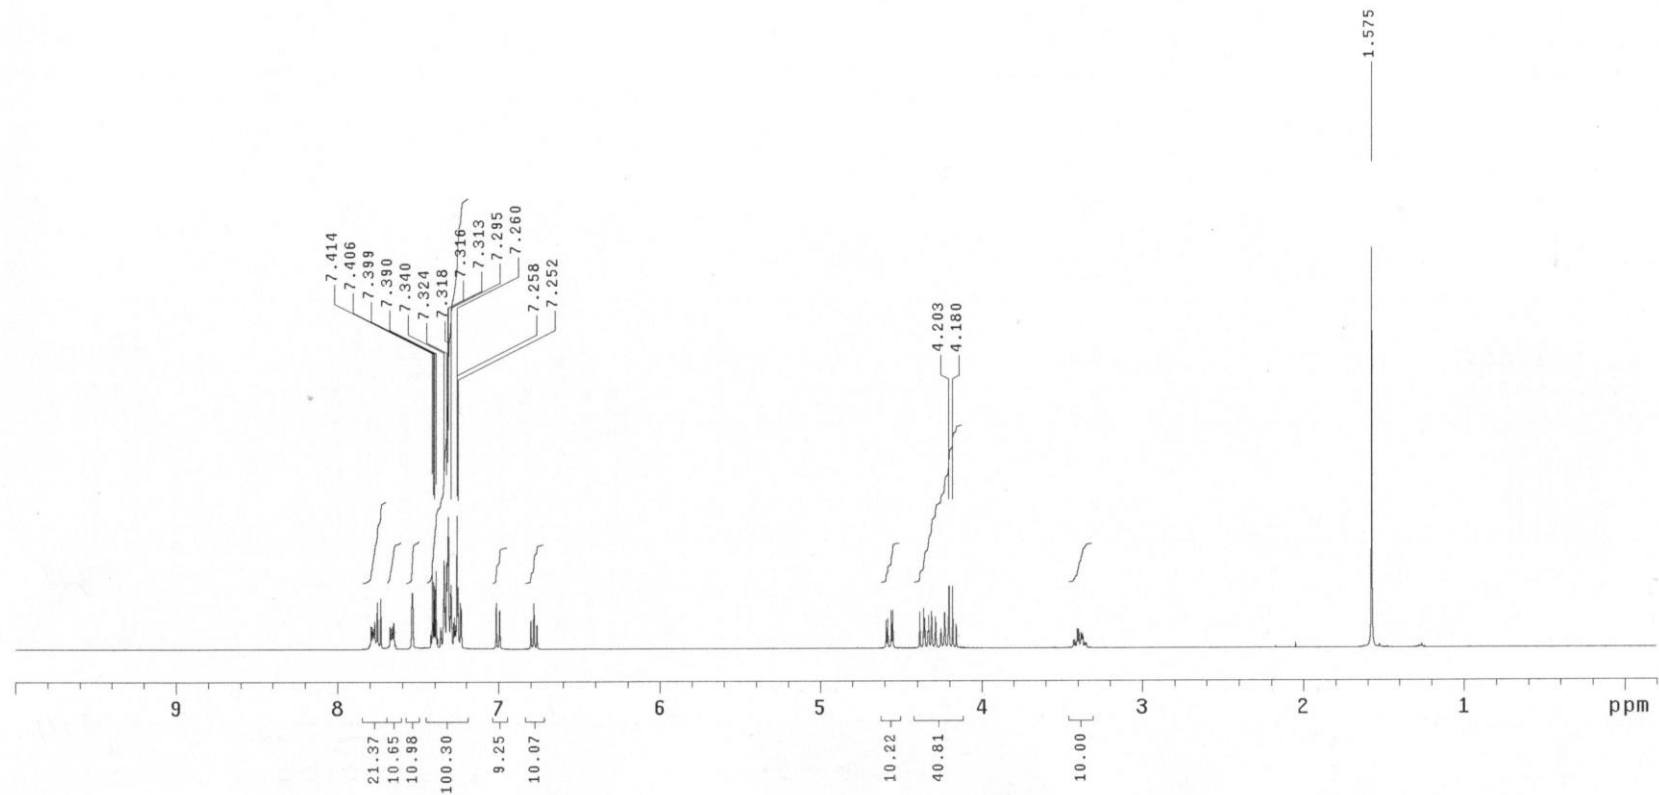



# Compound 7q (<sup>13</sup>C-NMR spectral data)

MC0515DN

Pulse Sequence: s2pu1  
UNITYplus-400 "unity400"  
Date: May 20 2019  
Solvent: CDCl<sub>3</sub>  
Ambient temperature  
Total 6016 repetitions

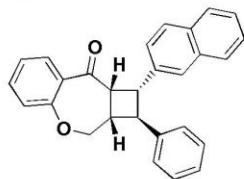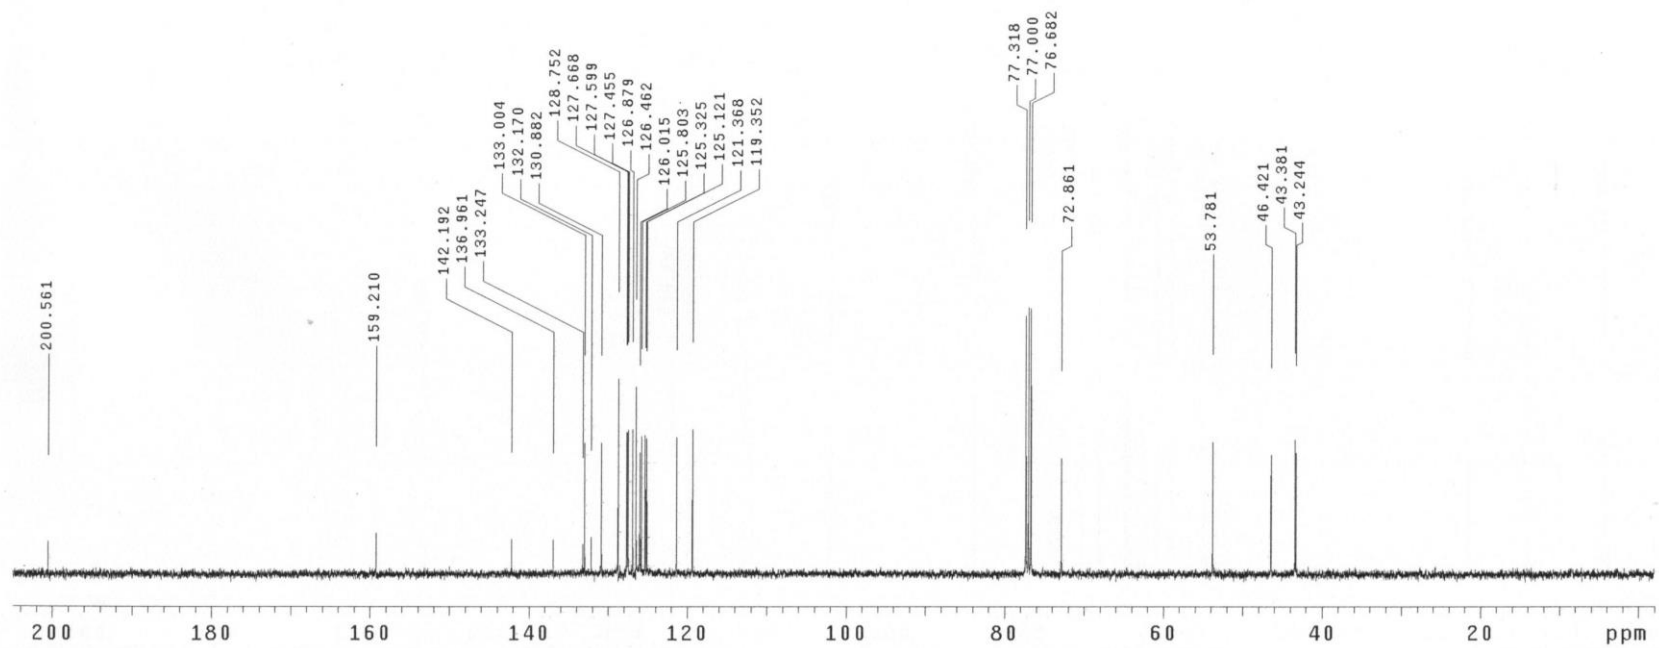

# Compound 8 (<sup>1</sup>H-NMR spectral data)

MCMe2324

Pulse Sequence: s2pu1  
UNITYplus-400 "unity400"  
Date: Jun 10 2019  
Solvent: CDC13  
Ambient temperature  
Total 32 repetitions

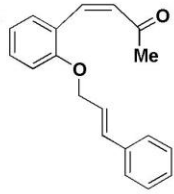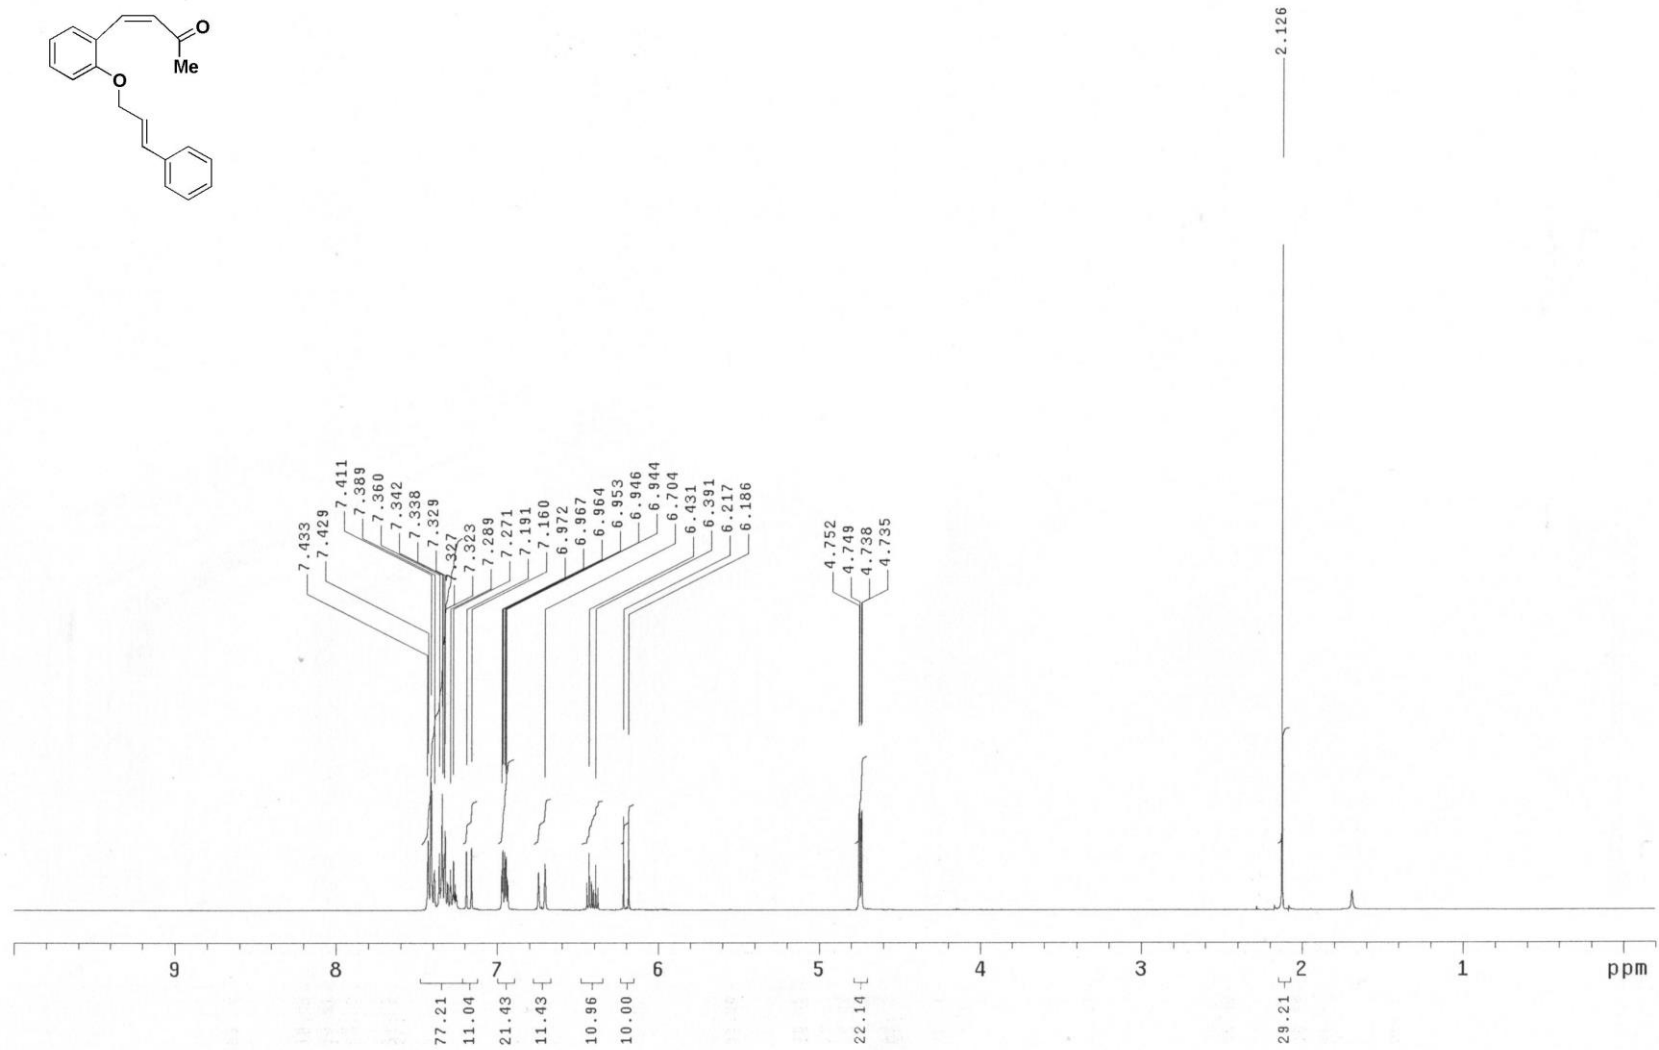

# Compound 8 (<sup>13</sup>C-NMR spectral data)

MCMe2324

Pulse Sequence: s2pu1  
UNITYplus-400 "unity400"  
Date: Jun 10 2019  
Solvent: CDCl<sub>3</sub>  
Ambient temperature  
Total 2832 repetitions

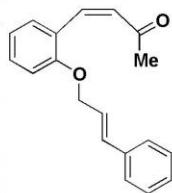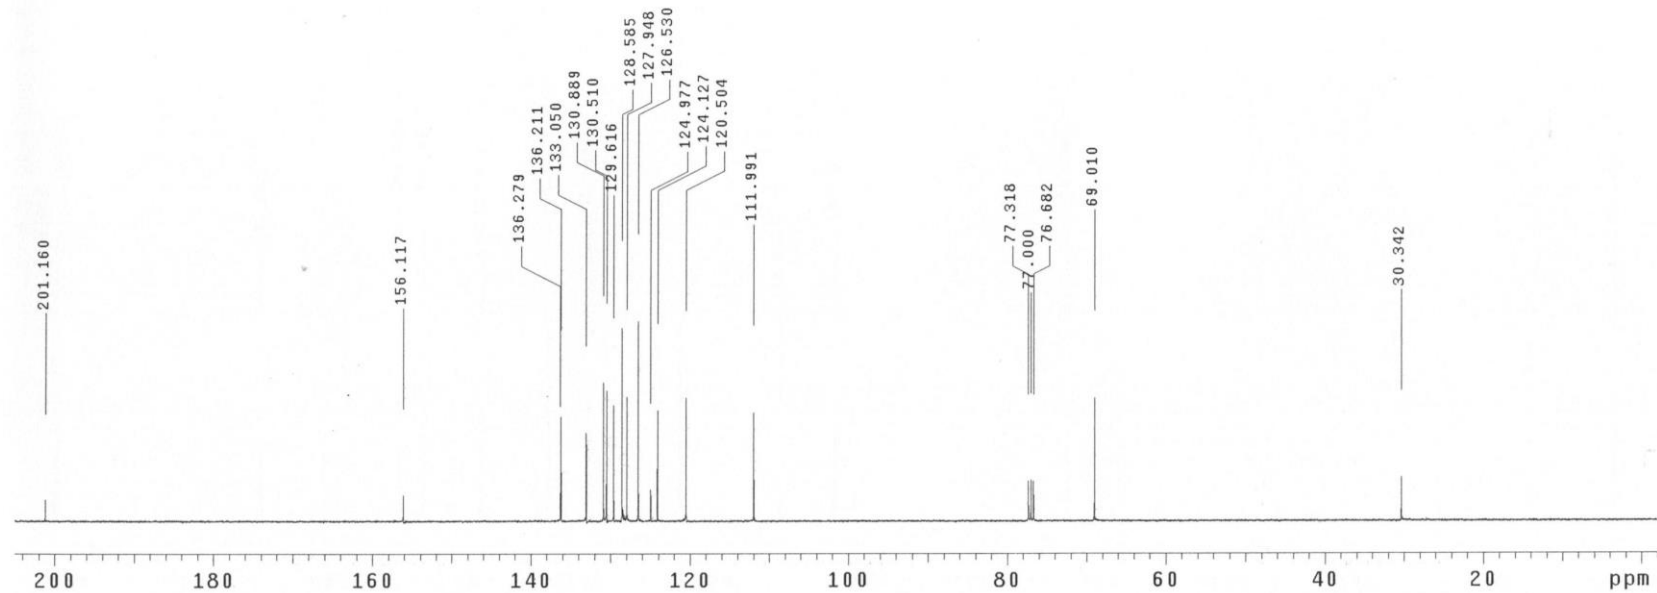

## X-ray crystal data of compound 6a (CCDC 1943157)

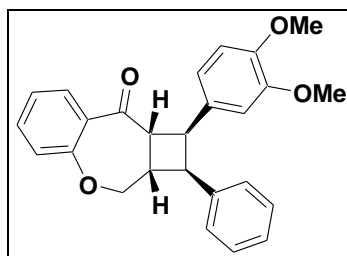

**Sample preparation** : A solution of compound **6a** (30 mg) in  $\text{CH}_2\text{Cl}_2$  (10 mL) was placed in a tube (10 mL). EtOAc (2 mL) was added slowly to the vial with a dropper. The vial was closed with little cotton and kept at room temperature for 2 days. Then, colorless prisms were observed.

**Crystal measurement** : X-ray crystal structures were determined with a Bruker Enraf-Nonius single-crystal diffractometer (CAD4, Kappa CCD). Thermal ellipsoids are drawn at 50% probability level.

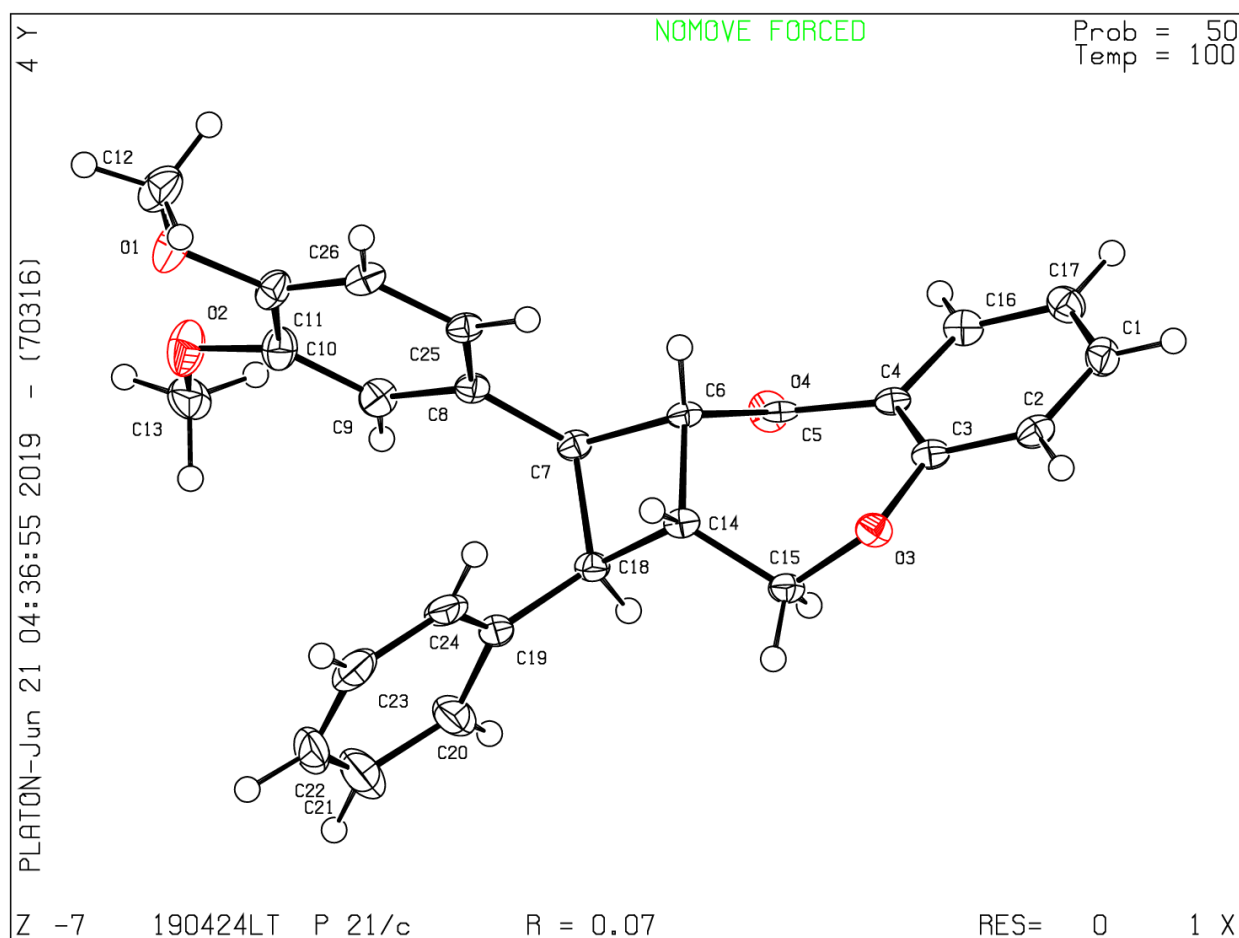

|                                   |                                                                                                        |
|-----------------------------------|--------------------------------------------------------------------------------------------------------|
| Identification code               | 190424LT                                                                                               |
| Empirical formula                 | C <sub>26</sub> H <sub>24</sub> O <sub>4</sub>                                                         |
| Formula weight                    | 400.45                                                                                                 |
| Temperature                       | 100(2) K                                                                                               |
| Wavelength                        | 0.71073 Å                                                                                              |
| Crystal system                    | Monoclinic                                                                                             |
| Space group                       | P2 <sub>1</sub> /c                                                                                     |
| Unit cell dimensions              | a = 17.962(3) Å      α = 90°.<br>b = 10.2398(15) Å    β = 93.763(6)°.<br>c = 11.0654(16) Å    γ = 90°. |
| Volume                            | 2030.8(5) Å <sup>3</sup>                                                                               |
| Z                                 | 4                                                                                                      |
| Density (calculated)              | 1.310 Mg/m <sup>3</sup>                                                                                |
| Absorption coefficient            | 0.087 mm <sup>-1</sup>                                                                                 |
| F(000)                            | 848                                                                                                    |
| Crystal size                      | 0.27 x 0.25 x 0.25 mm <sup>3</sup>                                                                     |
| Theta range for data collection   | 2.273 to 26.665°.                                                                                      |
| Index ranges                      | -22 ≤ h ≤ 22, -12 ≤ k ≤ 12, -13 ≤ l ≤ 13                                                               |
| Reflections collected             | 28293                                                                                                  |
| Independent reflections           | 4214 [R(int) = 0.0777]                                                                                 |
| Completeness to theta = 25.242°   | 99.9 %                                                                                                 |
| Absorption correction             | Semi-empirical from equivalents                                                                        |
| Max. and min. transmission        | 0.7454 and 0.4629                                                                                      |
| Refinement method                 | Full-matrix least-squares on F <sup>2</sup>                                                            |
| Data / restraints / parameters    | 4214 / 0 / 273                                                                                         |
| Goodness-of-fit on F <sup>2</sup> | 1.082                                                                                                  |
| Final R indices [I > 2σ(I)]       | R1 = 0.0733, wR2 = 0.2118                                                                              |
| R indices (all data)              | R1 = 0.0878, wR2 = 0.2262                                                                              |
| Extinction coefficient            | n/a                                                                                                    |
| Largest diff. peak and hole       | 0.694 and -0.430 e.Å <sup>-3</sup>                                                                     |

## X-ray crystal data of compound 6d (CCDC 1943158)

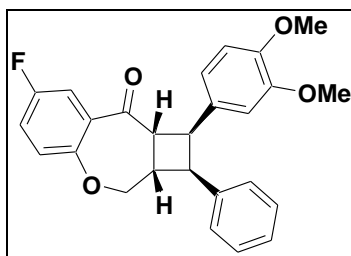

**Sample preparation** : A solution of compound **6d** (30 mg) in  $\text{CH}_2\text{Cl}_2$  (10 mL) was placed in a tube (10 mL). EtOAc (2 mL) was added slowly to the vial with a dropper. The vial was closed with little cotton and kept at room temperature for 2 days. Then, colorless prisms were observed.

**Crystal measurement** : X-ray crystal structures were determined with a Bruker Enraf-Nonius single-crystal diffractometer (CAD4, Kappa CCD). Thermal ellipsoids are drawn at 50% probability level.

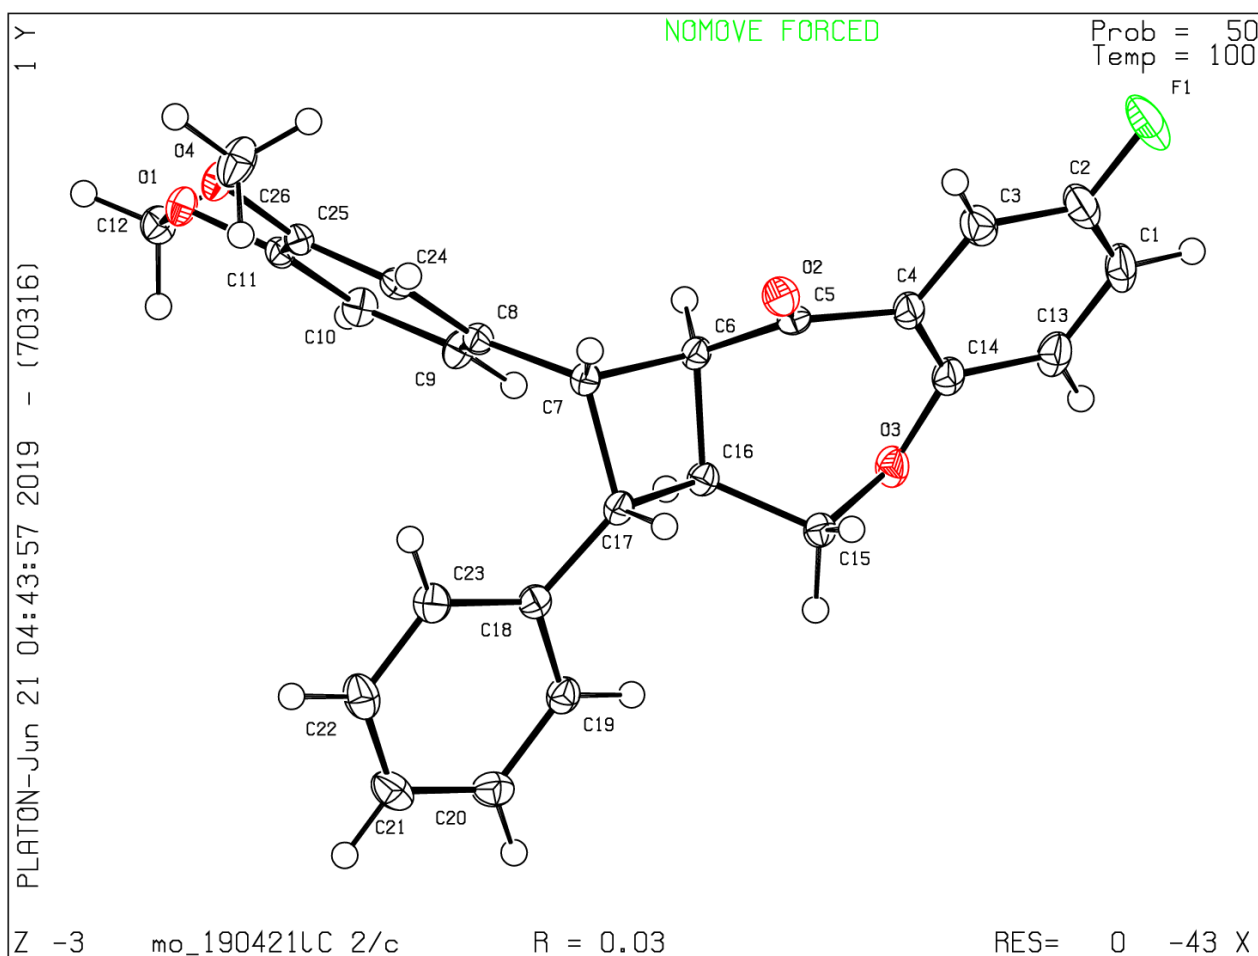

|                                      |                                             |                                |
|--------------------------------------|---------------------------------------------|--------------------------------|
| Identification code                  | mo_190421lt_0m                              |                                |
| Empirical formula                    | C26 H23 F O4                                |                                |
| Formula weight                       | 418.44                                      |                                |
| Temperature                          | 100(2) K                                    |                                |
| Wavelength                           | 0.71073 Å                                   |                                |
| Crystal system                       | Monoclinic                                  |                                |
| Space group                          | C2/c                                        |                                |
| Unit cell dimensions                 | a = 27.5645(11) Å                           | $\alpha = 90^\circ$ .          |
|                                      | b = 7.0521(3) Å                             | $\beta = 114.5740(10)^\circ$ . |
|                                      | c = 22.8442(10) Å                           | $\gamma = 90^\circ$ .          |
| Volume                               | 4038.4(3) Å <sup>3</sup>                    |                                |
| Z                                    | 8                                           |                                |
| Density (calculated)                 | 1.376 Mg/m <sup>3</sup>                     |                                |
| Absorption coefficient               | 0.098 mm <sup>-1</sup>                      |                                |
| F(000)                               | 1760                                        |                                |
| Crystal size                         | 0.25 x 0.20 x 0.20 mm <sup>3</sup>          |                                |
| Theta range for data collection      | 1.625 to 26.487°.                           |                                |
| Index ranges                         | -34<=h<=34, -8<=k<=8, -28<=l<=28            |                                |
| Reflections collected                | 34057                                       |                                |
| Independent reflections              | 4175 [R(int) = 0.0291]                      |                                |
| Completeness to theta = 25.242°      | 100.0 %                                     |                                |
| Absorption correction                | Semi-empirical from equivalents             |                                |
| Max. and min. transmission           | 0.7454 and 0.7264                           |                                |
| Refinement method                    | Full-matrix least-squares on F <sup>2</sup> |                                |
| Data / restraints / parameters       | 4175 / 0 / 282                              |                                |
| Goodness-of-fit on F <sup>2</sup>    | 1.031                                       |                                |
| Final R indices [ $I > 2\sigma(I)$ ] | R1 = 0.0345, wR2 = 0.0835                   |                                |
| R indices (all data)                 | R1 = 0.0412, wR2 = 0.0881                   |                                |
| Extinction coefficient               | n/a                                         |                                |
| Largest diff. peak and hole          | 0.296 and -0.208 e.Å <sup>-3</sup>          |                                |

## X-ray crystal data of compound 7a (CCDC 1943159)

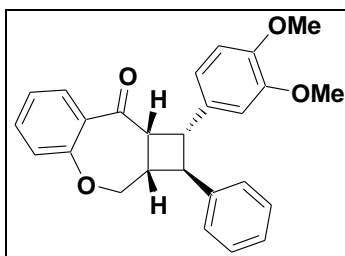

**Sample preparation** : A solution of compound **7a** (30 mg) in  $\text{CH}_2\text{Cl}_2$  (10 mL) was placed in a tube (10 mL). EtOAc (2 mL) was added slowly to the vial with a dropper. The vial was closed with little cotton and kept at room temperature for 2 days. Then, colorless prisms were observed.

**Crystal measurement** : X-ray crystal structures were determined with a Bruker Enraf-Nonius single-crystal diffractometer (CAD4, Kappa CCD). Thermal ellipsoids are drawn at 50% probability level.

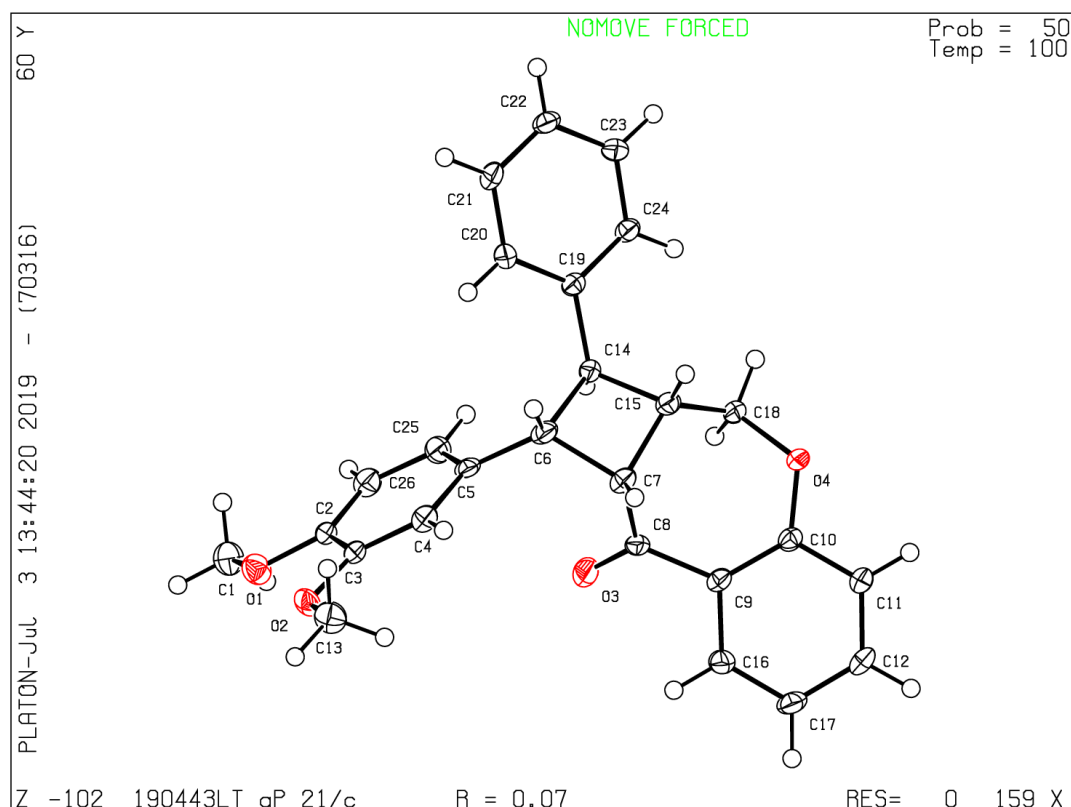



|                                   |                                                                                                            |
|-----------------------------------|------------------------------------------------------------------------------------------------------------|
| Identification code               | 190443LT_a                                                                                                 |
| Empirical formula                 | C <sub>26</sub> H <sub>24</sub> O <sub>4</sub>                                                             |
| Formula weight                    | 400.45                                                                                                     |
| Temperature                       | 100(2) K                                                                                                   |
| Wavelength                        | 0.71073 Å                                                                                                  |
| Crystal system                    | Monoclinic                                                                                                 |
| Space group                       | P2 <sub>1</sub> /c                                                                                         |
| Unit cell dimensions              | a = 13.8730(7) Å      α = 90°.<br>b = 22.7202(12) Å     β = 98.843(2)°.<br>c = 6.3384(3) Å        γ = 90°. |
| Volume                            | 1974.10(17) Å <sup>3</sup>                                                                                 |
| Z                                 | 4                                                                                                          |
| Density (calculated)              | 1.347 Mg/m <sup>3</sup>                                                                                    |
| Absorption coefficient            | 0.090 mm <sup>-1</sup>                                                                                     |
| F(000)                            | 848                                                                                                        |
| Crystal size                      | 0.14 x 0.12 x 0.04 mm <sup>3</sup>                                                                         |
| Theta range for data collection   | 1.485 to 26.410°.                                                                                          |
| Index ranges                      | -15 ≤ h ≤ 17, -17 ≤ k ≤ 28, -7 ≤ l ≤ 7                                                                     |
| Reflections collected             | 14699                                                                                                      |
| Independent reflections           | 4040 [R(int) = 0.0306]                                                                                     |
| Completeness to theta = 25.242°   | 100.0 %                                                                                                    |
| Absorption correction             | Semi-empirical from equivalents                                                                            |
| Max. and min. transmission        | 0.7454 and 0.6781                                                                                          |
| Refinement method                 | Full-matrix least-squares on F <sup>2</sup>                                                                |
| Data / restraints / parameters    | 4040 / 0 / 273                                                                                             |
| Goodness-of-fit on F <sup>2</sup> | 1.131                                                                                                      |
| Final R indices [I > 2σ(I)]       | R1 = 0.0716, wR2 = 0.1719                                                                                  |
| R indices (all data)              | R1 = 0.0849, wR2 = 0.1787                                                                                  |
| Extinction coefficient            | n/a                                                                                                        |
| Largest diff. peak and hole       | 0.711 and -0.293 e.Å <sup>-3</sup>                                                                         |

## X-ray crystal data of compound 7m (CCDC 1943160)

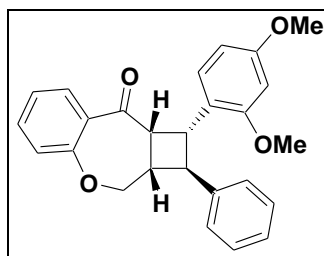

**Sample preparation** : A solution of compound **7m** (30 mg) in CH<sub>2</sub>Cl<sub>2</sub> (10 mL) was placed in a tube (10 mL). EtOAc (2 mL) was added slowly to the vial with a dropper. The vial was closed with little cotton and kept at room temperature for 2 days. Then, colorless prisms were observed.

**Crystal measurement** : X-ray crystal structures were determined with a Bruker Enraf-Nonius single-crystal diffractometer (CAD4, Kappa CCD). Thermal ellipsoids are drawn at 50% probability level.

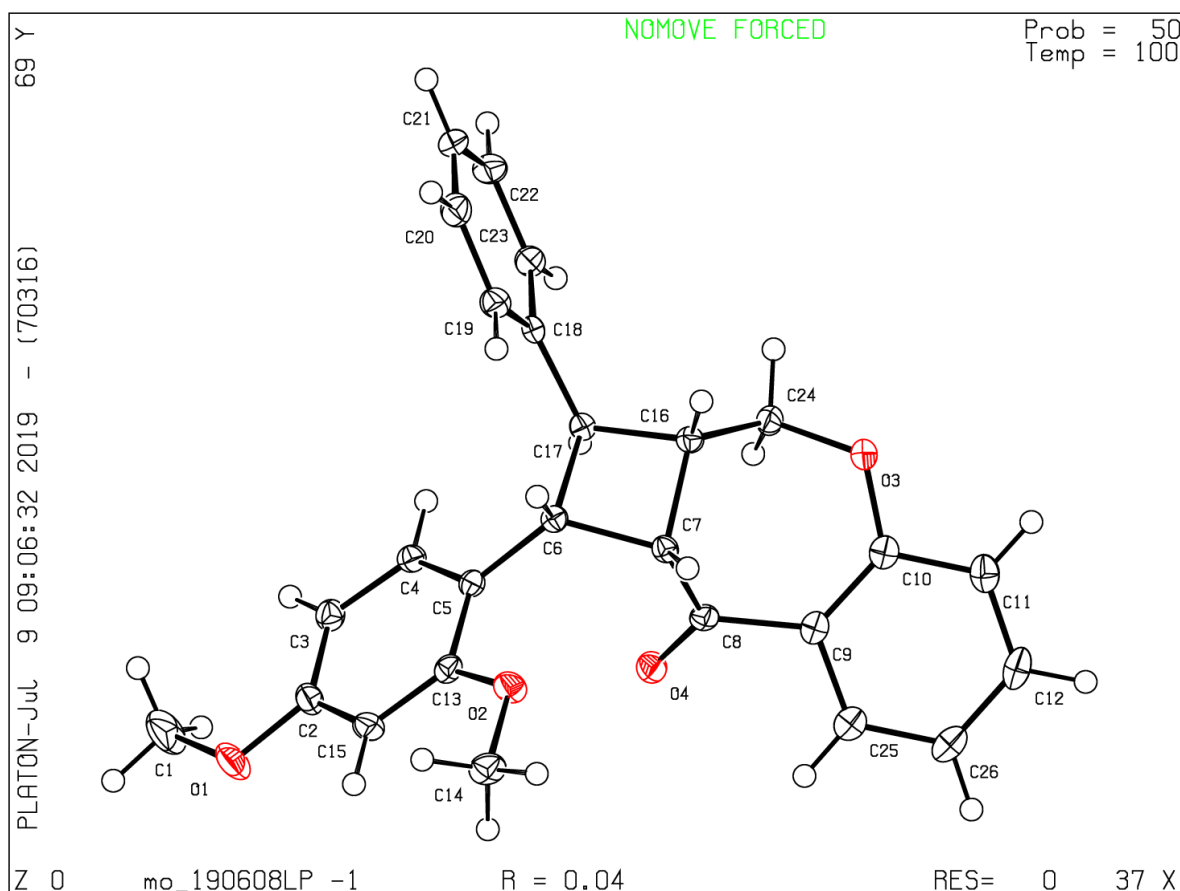

|                                   |                                             |                               |
|-----------------------------------|---------------------------------------------|-------------------------------|
| Identification code               | mo_190608LT_0m                              |                               |
| Empirical formula                 | C26 H24 O4                                  |                               |
| Formula weight                    | 400.45                                      |                               |
| Temperature                       | 100(2) K                                    |                               |
| Wavelength                        | 0.71073 Å                                   |                               |
| Crystal system                    | Triclinic                                   |                               |
| Space group                       | P-1                                         |                               |
| Unit cell dimensions              | a = 9.4174(5) Å                             | $\alpha = 92.823(2)^\circ$ .  |
|                                   | b = 10.5047(5) Å                            | $\beta = 108.693(2)^\circ$ .  |
|                                   | c = 11.7070(6) Å                            | $\gamma = 109.839(2)^\circ$ . |
| Volume                            | 1015.58(9) Å <sup>3</sup>                   |                               |
| Z                                 | 2                                           |                               |
| Density (calculated)              | 1.310 Mg/m <sup>3</sup>                     |                               |
| Absorption coefficient            | 0.087 mm <sup>-1</sup>                      |                               |
| F(000)                            | 424                                         |                               |
| Crystal size                      | 0.30 x 0.28 x 0.27 mm <sup>3</sup>          |                               |
| Theta range for data collection   | 1.866 to 26.432°.                           |                               |
| Index ranges                      | -11<=h<=11, -13<=k<=13, -14<=l<=14          |                               |
| Reflections collected             | 23935                                       |                               |
| Independent reflections           | 4180 [R(int) = 0.0254]                      |                               |
| Completeness to theta = 25.242°   | 100.0 %                                     |                               |
| Absorption correction             | Semi-empirical from equivalents             |                               |
| Max. and min. transmission        | 0.7454 and 0.7241                           |                               |
| Refinement method                 | Full-matrix least-squares on F <sup>2</sup> |                               |
| Data / restraints / parameters    | 4180 / 0 / 273                              |                               |
| Goodness-of-fit on F <sup>2</sup> | 1.026                                       |                               |
| Final R indices [I>2sigma(I)]     | R1 = 0.0361, wR2 = 0.0856                   |                               |
| R indices (all data)              | R1 = 0.0443, wR2 = 0.0909                   |                               |
| Extinction coefficient            | n/a                                         |                               |
| Largest diff. peak and hole       | 0.268 and -0.254 e.Å <sup>-3</sup>          |                               |
